# Supplementary material for: Introduction of a condensed, reverse tricarboxylic acid cycle for additional CO2 fixation in plants
Source: bioRxiv preprint, doi:10.1101/2022.03.04.483018, version 1 (2022-03-05)
Supplement: Supplemental File S2 [file 483018_file03.xlsx]

## Sheet: Empty_Vector
Accession	Description	Exp. q-value: Combined	# PSMs	# Protein Unique Peptides	# AAs	Abundance cp_EV	Normalized Abundance cp_EV(%)	Abundance EV1	Normalized Abundance EV1 (%)	Abundance EV2	Normalized Abundance EV2(%)	Abundance EV3	Normalized Abundance EV3(%)	Abundance EV4	Normalized Abundance EV4(%)	Abundance EV5	Normalized Abundance EV5(%)
Csa_019099612.1	PREDICTED: uncharacterized protein LOC109132455 [Camelina sativa]	0	1151	7	258	5.42223e+08	10.3725	4.27459e+10	7.64545	5.95581e+10	11.5281	5.8974e+10	8.87955	6.51591e+10	8.63682	4.05067e+10	7.5308	used protein sequence and blasted it --> rubisco large subunit (uniprot)
Csa_010460766.1	PREDICTED: chlorophyll a-b binding protein 2, chloroplastic isoform X1 [Camelina sativa]	0	726	8	267	2.32874e+08	4.30463	1.20305e+10	2.07923	1.01083e+10	1.89062	1.46639e+10	2.13348	1.51749e+10	1.94363	1.28646e+10	2.3111
Csa_010430302.1	PREDICTED: photosystem I reaction center subunit II-1, chloroplastic-like [Camelina sativa]	0	675	6	213	1.64673e+08	3.81565	4.23681e+09	0.917884	5.08448e+09	1.19208	6.00128e+09	1.0945	6.0308e+09	0.968263	5.09721e+09	1.14785
Csa_010464595.1	PREDICTED: histone H2B.9-like [Camelina sativa]	0	215	0	126	8.8285e+07	3.45814	544607948	0.199453	4.87114e+08	0.193063	7.70816e+08	0.237646	1.03013e+09	0.27959	5.231e+08	0.199135
Csa_010490718.1	PREDICTED: histone H2B.9 [Camelina sativa]	0	215	0	131	8.8285e+07	3.32615	544607948	0.191841	4.87114e+08	0.185694	7.70816e+08	0.228575	1.03013e+09	0.268918	5.231e+08	0.191535
Csa_010426021.1	PREDICTED: histone H4 [Camelina sativa]	0	116	13	103	6.65545e+07	3.18909	4.84623e+08	0.217118	2.01217e+08	0.0975585	6.32107e+08	0.238398	6.03858e+08	0.200491	3.38678e+08	0.157719
Csa_010426025.1	PREDICTED: histone H2B.7-like [Camelina sativa]	0	179	0	129	8.13436e+07	3.11215	500722269	0.179116	4.70689e+08	0.182214	7.49284e+08	0.225635	1.0137e+09	0.268732	5.03731e+08	0.187302
Csa_010421087.1	PREDICTED: histone H2B.10 [Camelina sativa]	0	230	2	146	8.98883e+07	3.03862	5.6618e+08	0.178949	4.94173e+08	0.16903	8.05203e+08	0.214241	1.06566e+09	0.249612	5.52491e+08	0.181513
Csa_010479049.1	PREDICTED: photosystem II 22 kDa protein, chloroplastic [Camelina sativa]	0	154	0	197	1.1029e+08	2.76309	1.3614e+09	0.318896	1.38071e+09	0.350004	1.3651e+09	0.269184	1.91134e+09	0.331795	1.26633e+09	0.308329
Csa_010474916.1	PREDICTED: photosystem I reaction center subunit II-2, chloroplastic-like [Camelina sativa]	0	579	0	247	1.21987e+08	2.43749	3.00784e+09	0.561934	3.28945e+09	0.665066	4.13499e+09	0.65032	4.16204e+09	0.576246	3.3617e+09	0.652823
Csa_010461444.1	PREDICTED: photosystem II 22 kDa protein, chloroplastic-like [Camelina sativa]	0	277	3	265	1.17295e+08	2.18455	1.61294e+09	0.280867	1662850976	0.313362	1.6717e+09	0.245054	2.07335e+09	0.267563	1.39624e+09	0.252725
Csa_010415258.1	PREDICTED: ribulose bisphosphate carboxylase small chain 1A, chloroplastic [Camelina sativa]	0	1992	7	181	6.23966e+07	1.70141	4.46038e+10	11.3716	4.88896e+10	13.4889	5.19099e+10	11.1409	6.51268e+10	12.3049	4.2095e+10	11.1554
Csa_010444775.1	PREDICTED: oxygen-evolving enhancer protein 1-1, chloroplastic [Camelina sativa]	0	1550	10	332	1.02335e+08	1.52129	1.00332e+10	1.39453	9.6773e+09	1.45564	1.16566e+10	1.3639	1.23273e+10	1.26978	9.40934e+09	1.35942
Csa_010438388.1	PREDICTED: photosystem I reaction center subunit IV A, chloroplastic [Camelina sativa]	0	233	5	145	4.46899e+07	1.52114	1.29921e+09	0.413466	1.54935e+09	0.533606	1.78377e+09	0.477882	2.1885e+09	0.516151	1.70944e+09	0.565484
Csa_010442418.1	PREDICTED: pyruvate dehydrogenase E1 component subunit beta-1, mitochondrial [Camelina sativa]	0	45	9	366	1.10206e+08	1.48611	1.35729e+08	0.0171128	2.14807e+08	0.0293094	134382627	0.014263	1.68825e+08	0.0157744	1.12098e+08	0.0146909
Csa_010422289.1	PREDICTED: ATP synthase gamma chain 1, chloroplastic [Camelina sativa]	0	551	20	375	1.122e+08	1.47668	9.31396e+08	0.114612	7.82931e+08	0.104263	1.2239e+09	0.126784	1.00078e+09	0.091265	8.11791e+08	0.103836
Csa_010464514.1	PREDICTED: chlorophyll a-b binding protein CP29.2, chloroplastic [Camelina sativa]	0	305	8	289	8.61967e+07	1.47204	2.30106e+09	0.367417	2.69779e+09	0.466174	2.70789e+09	0.363985	2.28994e+09	0.270972	1.9607e+09	0.325421
Csa_010434201.1	PREDICTED: oxygen-evolving enhancer protein 3-1, chloroplastic [Camelina sativa]	0	1177	12	224	6.21516e+07	1.3694	3.16799e+09	0.652624	4.31711e+09	0.962463	5.94806e+09	1.03152	6.99139e+09	1.06737	3.89947e+09	0.83501
Csa_010460962.1	PREDICTED: photosystem I reaction center subunit III, chloroplastic [Camelina sativa]	0	400	10	218	4.79779e+07	1.0862	1.34885e+09	0.28552	2.28736e+09	0.523983	2.6838e+09	0.478237	2255868538	0.353879	1.23937e+09	0.272696
Csa_010447419.1	PREDICTED: ATP synthase subunit b', chloroplastic-like [Camelina sativa]	0	134	9	220	4.80194e+07	1.07726	1.01049e+09	0.211952	9.23161e+08	0.209553	1.09644e+09	0.193603	9.23453e+08	0.143546	8.0123e+08	0.17469
Csa_010440682.1	PREDICTED: uncharacterized protein LOC104723946 [Camelina sativa]	0	620	24	507	9.81587e+07	0.955537	2.17828e+09	0.198259	2.14863e+09	0.211638	2.69478e+09	0.206474	3.47153e+09	0.234159	2.12306e+09	0.200858
Csa_010444330.1	PREDICTED: photosystem I reaction center subunit N, chloroplastic [Camelina sativa]	0	479	6	171	2.98528e+07	0.861619	1.93105e+09	0.521105	2.00816e+09	0.586462	2.75455e+09	0.625755	2.83071e+09	0.566105	2.37742e+09	0.666874
Csa_010457809.1	PREDICTED: putative oxygen-evolving enhancer protein 2-2 isoform X2 [Camelina sativa]	0	1812	0	219	3.49807e+07	0.788335	3.80911e+09	0.802615	4.40994e+09	1.0056	5.76195e+09	1.02206	5.31656e+09	0.830204	3.60823e+09	0.790286
Csa_010470604.1	PREDICTED: ribulose bisphosphate carboxylase small chain 1A, chloroplastic isoform X2 [Camelina sativa]	0	401	0	136	1.95803e+07	0.71057	15623785694	5.30122	1.65018e+10	6.05942	1.74836e+10	4.99393	1.99842e+10	5.02511	1.36375e+10	4.80982
Csa_010484176.1	PREDICTED: photosystem I reaction center subunit N, chloroplastic isoform X2 [Camelina sativa]	0	347	0	181	2.57704e+07	0.702699	1.34886e+09	0.343888	1.39468e+09	0.384799	2.08268e+09	0.446985	2.32888e+09	0.440014	1.90627e+09	0.505172
Csa_010480553.1	PREDICTED: LOW QUALITY PROTEIN: GDSL esterase/lipase At5g63170 [Camelina sativa]	0.001	256	1	337	4.74277e+07	0.69459	2.42332e+10	3.31825	3.18923e+10	4.72601	2.78978e+10	3.21581	3.89823e+10	3.95581	2.72039e+10	3.87199
Csa_010459118.1	PREDICTED: chlorophyll a-b binding protein CP24 10B, chloroplastic-like isoform X2 [Camelina sativa]	0	451	12	261	3.49496e+07	0.660889	1.52887e+09	0.270308	1282448654	0.245379	1.44707e+09	0.215377	2.37158e+09	0.310739	1.11593e+09	0.205083
Csa_010457808.1	PREDICTED: oxygen-evolving enhancer protein 2-1, chloroplastic isoform X1 [Camelina sativa]	0	1812	0	263	3.49807e+07	0.656446	3.80911e+09	0.668337	4.40994e+09	0.837365	5.76195e+09	0.851067	5.31656e+09	0.691311	3.60823e+09	0.658071
Csa_010427541.1	PREDICTED: 50S ribosomal protein 5, chloroplastic-like [Camelina sativa]	0	43	3	151	1.86289e+07	0.608889	8.2209e+07	0.0251229	1.08076e+08	0.0357429	1.14142e+08	0.0293642	1.37213e+08	0.0310755	8.26769e+07	0.0262628
Csa_010458012.1	PREDICTED: elongation factor 1-alpha 1 isoform X3 [Camelina sativa]	0	218	0	165	1.963e+07	0.587168	2.80605e+09	0.784765	1.94462e+09	0.588557	2.7276e+09	0.642164	2.69897e+09	0.559386	2.34486e+09	0.681659
Csa_010421955.1	PREDICTED: chlorophyll a-b binding protein CP26, chloroplastic [Camelina sativa]	0	362	22	281	3.28733e+07	0.577383	3.29171e+09	0.540559	2695371700	0.479017	2.83502e+09	0.391922	3.7008e+09	0.450389	2.77927e+09	0.474416
Csa_010446604.1	PREDICTED: cinnamyl alcohol dehydrogenase 7 [Camelina sativa]	0	14	0	357	39931288	0.552042	2.41836e+07	0.00312594	1.6415e+07	0.00229621	3.45192e+07	0.00375615	3.07419e+07	0.00294483	2.84276e+07	0.00381949
Csa_010435743.1	PREDICTED: ribulose bisphosphate carboxylase small chain F1, chloroplastic-like isoform X1 [Camelina sativa]	0	1625	12	181	1.96489e+07	0.535779	9.80748e+09	2.50038	9.51735e+09	2.62588	1.01375e+10	2.17571	1.20096e+10	2.26906	9.37857e+09	2.48538
Csa_010437162.1	PREDICTED: cinnamyl alcohol dehydrogenase 7-like [Camelina sativa]	0	40	3	368	3.99331e+07	0.535564	7.66093e+07	0.00960642	7.01927e+07	0.00952538	9.28862e+07	0.00980513	8.75118e+07	0.00813237	9.51806e+07	0.0124061
Csa_010425252.1	PREDICTED: 50S ribosomal protein L15, chloroplastic [Camelina sativa]	0	126	7	278	2.79154e+07	0.495593	3.65617e+08	0.060689	2.283e+08	0.041011	3.99626e+08	0.0558418	5.21919e+08	0.0642031	3.81756e+08	0.0658681
Csa_010480108.1	PREDICTED: photosystem I reaction center subunit V, chloroplastic-like [Camelina sativa]	0	241	6	162	1.5728e+07	0.479164	5.16873e+08	0.14723	5.35519e+08	0.165082	5.2599e+08	0.126128	7.98928e+08	0.168652	4.61325e+08	0.136592
Csa_010427315.1	PREDICTED: triosephosphate isomerase, cytosolic [Camelina sativa]	0	292	13	254	2.44071e+07	0.474252	1.02846e+09	0.186845	6.58759e+08	0.129518	1.43044e+09	0.218769	1.40478e+09	0.189136	1.24926e+09	0.235914
Csa_019085385.1	PREDICTED: uncharacterized protein LOC109126335 [Camelina sativa]	0	57	0	124	1.15171e+07	0.458402	1.2199e+08	0.0453973	1.29497e+08	0.0521525	1.28899e+08	0.0403811	9.96633e+07	0.027486	8.98479e+07	0.0347552
Csa_010436034.1	PREDICTED: 50S ribosomal protein L27, chloroplastic [Camelina sativa]	0	50	3	198	1.82519e+07	0.454956	1.83448e+08	0.0427539	1.53851e+08	0.0388038	1.91252e+08	0.0375224	2.30642e+08	0.0398356	1.35073e+08	0.0327217
Csa_010458156.1	PREDICTED: probable histone H2AXa [Camelina sativa]	0	62	1	143	1.23339e+07	0.425687	3.45867e+08	0.11161	1.84543e+08	0.0644464	4.81343e+08	0.130758	5.07024e+08	0.121252	3.7655e+08	0.126305
Csa_010427090.1	PREDICTED: 50S ribosomal protein L17, chloroplastic [Camelina sativa]	0	33	6	212	1.78056e+07	0.414522	8.57918e+07	0.018674	5.3489e+07	0.0125999	8.75164e+07	0.0160363	1.22546e+08	0.019768	7.94732e+07	0.0179812
Csa_010429775.1	PREDICTED: photosystem II 10 kDa polypeptide, chloroplastic-like [Camelina sativa]	0	285	7	141	1.1698e+07	0.409466	5.85118e+08	0.191493	7.30806e+08	0.258834	8.73021e+08	0.240522	7.98711e+08	0.193717	5.80112e+08	0.197345
Csa_010421871.1	PREDICTED: ATP synthase subunit delta, chloroplastic [Camelina sativa]	0	151	13	233	1.79734e+07	0.380716	8.74367e+08	0.173167	740606432	0.158734	8.40979e+08	0.14021	7.68588e+08	0.112807	6.00773e+08	0.123677
Csa_010443836.1	PREDICTED: elongation factor 1-alpha 1 [Camelina sativa]	0	468	11	449	3.45012e+07	0.379241	5.57698e+09	0.573166	3.45119e+09	0.383849	5.31789e+09	0.46009	5.46473e+09	0.416217	4.44293e+09	0.474632
Csa_010455694.1	PREDICTED: probable histone H2A.7 [Camelina sativa]	0	39	0	150	1.15104e+07	0.378726	2.39425e+08	0.0736558	1.20883e+08	0.0402451	334304082	0.0865766	3.69831e+08	0.0843161	2.46015e+08	0.0786692
Csa_019089313.1	PREDICTED: 5-methyltetrahydropteroyltriglutamate--homocysteine methyltransferase 1-like, partial [Camelina sativa]	0	83	0	97	7.29584e+06	0.371219	7.29307e+08	0.34695	4.29135e+08	0.220933	7.98743e+08	0.319878	7.1505e+08	0.252094	670276194	0.331448
Csa_010428827.1	PREDICTED: L-ascorbate peroxidase T, chloroplastic [Camelina sativa]	0	26	5	436	3.04669e+07	0.344881	8.60085e+08	0.0910297	5.77619e+08	0.0661597	7.25665e+08	0.0646546	1.0082e+09	0.0790782	7.14233e+08	0.0785755
Csa_010468991.1	PREDICTED: peptidyl-prolyl cis-trans isomerase CYP20-3, chloroplastic-like [Camelina sativa]	0	355	11	265	1.83133e+07	0.341073	1.17641e+09	0.204852	1190014895	0.224256	1.41735e+09	0.20777	1.42995e+09	0.184532	1.16982e+09	0.211742
Csa_010505656.1	PREDICTED: ribulose bisphosphate carboxylase/oxygenase activase, chloroplastic isoform X1 [Camelina sativa]	0	5173	34	474	3.20283e+07	0.333489	1.37904e+10	1.34254	1.83478e+10	1.93305	1.85303e+10	1.51863	1.97049e+10	1.42165	1.26434e+10	1.27944
Csa_010416303.1	PREDICTED: geranylgeranyl diphosphate reductase, chloroplastic [Camelina sativa]	0	259	20	468	2.85828e+07	0.301429	2.85914e+08	0.0281915	2.93798e+08	0.0313503	3.82766e+08	0.0317715	4.66765e+08	0.0341076	2.89795e+08	0.0297015
Csa_010462399.1	PREDICTED: chaperonin 60 subunit beta 1, chloroplastic [Camelina sativa]	0	1133	13	600	3.64714e+07	0.300005	3.6423e+09	0.280125	2.84124e+09	0.23648	4.12054e+09	0.26678	4.85464e+09	0.276696	3.57651e+09	0.285918
Csa_010497107.1	PREDICTED: calcium sensing receptor, chloroplastic [Camelina sativa]	0	175	20	389	2.35013e+07	0.298173	4.90238e+08	0.0581548	2.80436e+08	0.0360016	5.32874e+08	0.0532139	5.13559e+08	0.045148	4.24526e+08	0.0523467
Csa_010435345.1	PREDICTED: photosystem I reaction center subunit XI, chloroplastic-like [Camelina sativa]	0	290	6	219	1.30546e+07	0.294203	1.0663e+09	0.224678	1.28851e+09	0.29382	1.29737e+09	0.230127	1.64311e+09	0.256578	1.06777e+09	0.233866
Csa_010483858.1	PREDICTED: peter Pan-like protein isoform X2 [Camelina sativa]	0.023	1	0	322	19009012	0.29136		0		0		0		0		0
Csa_010486761.1	PREDICTED: probable thionin-2.4 [Camelina sativa]	0	15	0	132	7762827	0.29025	275432809	0.0962875	123547328	0.046741	436441562	0.128441	550396484	0.142594	447893350	0.162755
Csa_010487733.1	PREDICTED: probable thionin-2.4 [Camelina sativa]	0	15	0	132	7762827	0.29025	275432809	0.0962875	123547328	0.046741	436441562	0.128441	550396484	0.142594	447893350	0.162755
Csa_010422478.1	PREDICTED: cytochrome b6-f complex iron-sulfur subunit, chloroplastic [Camelina sativa]	0	141	9	234	1.37076e+07	0.289116	8.24406e+08	0.162575	7.32036e+08	0.156227	9.16053e+08	0.152074	7.03588e+08	0.102826	6.70365e+08	0.137413
Csa_010457901.1	PREDICTED: 50S ribosomal protein L4, chloroplastic-like [Camelina sativa]	0	71	12	282	1.65018e+07	0.288807	1.97301e+08	0.0322856	1.3411e+08	0.0237493	2.8096e+08	0.038703	4.06115e+08	0.0492491	2.73432e+08	0.0465087
Csa_010414717.1	PREDICTED: thionin-like isoform X1 [Camelina sativa]	0	15	0	133	7762827	0.288068	275432809	0.0955635	123547328	0.0463895	436441562	0.127475	550396484	0.141521	447893350	0.161531
Csa_010434541.1	PREDICTED: probable thionin-2.4 [Camelina sativa]	0	17	1	134	7762827	0.285918	296686029	0.102169	123547328	0.0460434	4.36699e+08	0.126598	5.50812e+08	0.140571	4.48096e+08	0.160399
Csa_010455585.1	PREDICTED: probable thionin-2.4 [Camelina sativa]	0	15	0	134	7762827	0.285918	275432809	0.0948504	123547328	0.0460434	436441562	0.126523	550396484	0.140465	447893350	0.160326
Csa_010426909.1	PREDICTED: probable thionin-2.4 [Camelina sativa]	0	103	2	134	7.52495e+06	0.277157	571922475	0.196952	2.80543e+08	0.104552	623467507	0.180742	6.13227e+08	0.1565	5.23772e+08	0.187487
Csa_010506698.1	PREDICTED: protein CURVATURE THYLAKOID 1B, chloroplastic [Camelina sativa]	0	51	2	181	9.8933e+06	0.269767	1.84224e+07	0.00469674	1.9795e+07	0.00546154	4.12841e+07	0.00886041	3.99966e+07	0.00755688	1.95965e+07	0.00519319
Csa_010457702.1	PREDICTED: peter Pan-like protein [Camelina sativa]	0.023	1	0	352	19009012	0.266528		0		0		0		0		0
Csa_010470239.1	PREDICTED: thionin-like [Camelina sativa]	0	15	0	144	7762827	0.266063	275432809	0.0882635	123547328	0.0428459	436441562	0.117737	550396484	0.130711	447893350	0.149192
Csa_019087994.1	PREDICTED: probable thionin-2.4 isoform X1 [Camelina sativa]	0.006	45	0	127	6.82634e+06	0.265284	1.63781e+08	0.0595096	70292179	0.0276402	88142582	0.0269607	6.61877e+07	0.0178226	5.36102e+07	0.0202478
Csa_010426187.1	PREDICTED: chlorophyll a-b binding protein 4, chloroplastic-like [Camelina sativa]	0	74	5	253	1.35631e+07	0.264584	5.02172e+08	0.0915925	4.05679e+08	0.0800757	6.28884e+08	0.0965607	4.73428e+08	0.0639929	3.9542e+08	0.0749673
Csa_010460127.1	PREDICTED: ubiquitin-40S ribosomal protein S27a-1-like [Camelina sativa]	0	445	0	156	8.22009e+06	0.260063	1.89747e+09	0.561278	9.0957e+08	0.291172	1.82622e+09	0.454755	2.15543e+09	0.472506	1.64632e+09	0.506201
Csa_010446730.1	PREDICTED: oxygen-evolving enhancer protein 1, chloroplastic-like [Camelina sativa]	0	65	0	332	1.7407e+07	0.258769	9.7261e+08	0.135185	8.89173e+08	0.133748	8.41986e+08	0.0985182	8.98225e+08	0.092522	7.78731e+08	0.112508
Csa_010413295.1	PREDICTED: ubiquitin-40S ribosomal protein S27a-2-like [Camelina sativa]	0	472	3	157	8.22009e+06	0.258407	1.98494e+09	0.583411	9.59119e+08	0.305078	1.93524e+09	0.478834	2.27249e+09	0.494996	1.72924e+09	0.52831
Csa_010502775.1	PREDICTED: chlorophyll a-b binding protein 5, chloroplastic-like [Camelina sativa]	0	688	5	266	1.36059e+07	0.252449	1.15382e+09	0.200163	1.16332e+09	0.218403	1.49871e+09	0.21887	1.46052e+09	0.187769	9.03241e+08	0.162876
Csa_010506160.1	PREDICTED: 50S ribosomal protein L3-1, chloroplastic [Camelina sativa]	0	126	14	271	1.37348e+07	0.250139	5.33204e+08	0.090793	324555757	0.0598079	5.5599e+08	0.0796981	6.85226e+08	0.0864695	5.35142e+08	0.0947182
Csa_010464816.1	PREDICTED: probable thionin-2.4 [Camelina sativa]	0.006	45	0	135	6.82634e+06	0.249563	1.63781e+08	0.0559831	70292179	0.0260023	88142582	0.0253631	6.61877e+07	0.0167665	5.36102e+07	0.0190479
Csa_010459681.1	PREDICTED: ferredoxin--NADP reductase, leaf isozyme 2, chloroplastic-like [Camelina sativa]	0	306	17	373	1.85744e+07	0.245772	7.49761e+08	0.0927561	5.88596e+08	0.0788037	5.56887e+08	0.0579973	6.62296e+08	0.0607213	5.07192e+08	0.0652224
Csa_010418122.1	PREDICTED: photosystem I chlorophyll a/b-binding protein 3-1, chloroplastic [Camelina sativa]	0	282	7	273	1.33474e+07	0.241303	8.95763e+08	0.151411	6.55431e+08	0.119895	1.12013e+09	0.159387	8.79939e+08	0.110227	6.61929e+08	0.116301
Csa_010460829.1	PREDICTED: photosystem I reaction center subunit psaK, chloroplastic [Camelina sativa]	0	7	2	130	5.86851e+06	0.222798	38283872	0.0135894	24941884	0.0095813	46037364	0.0137568	31376452	0.00825389	37206556	0.0137281
Csa_010465058.1	PREDICTED: phosphoglycerate kinase 1, chloroplastic [Camelina sativa]	0	1029	28	481	2.16635e+07	0.222285	3.58931e+09	0.344345	3.04982e+09	0.316641	4.26915e+09	0.344784	4.6614e+09	0.331413	3.09246e+09	0.308384
Csa_010436066.1	PREDICTED: 14-3-3-like protein GF14 chi isoform X2 [Camelina sativa]	0	201	7	268	1.159e+07	0.213439	6.71287e+08	0.115585	4.44372e+08	0.0828039	7.97983e+08	0.115667	8.78849e+08	0.112144	7.30114e+08	0.130674
Csa_010431846.1	PREDICTED: fructose-bisphosphate aldolase 2, chloroplastic [Camelina sativa]	0	1499	12	398	1.68892e+07	0.209437	8.20783e+09	0.951642	9.13044e+09	1.14564	9.85264e+09	0.961656	1.11694e+10	0.959723	7.82374e+09	0.942899
Csa_010426404.1	PREDICTED: 60S ribosomal protein L13-1 [Camelina sativa]	0	142	5	206	8.49e+06	0.203408	4.52593e+08	0.101384	2.83745e+08	0.0687859	4.53909e+08	0.0855956	6.09922e+08	0.101252	3.3333e+08	0.0776141
Csa_010489072.1	PREDICTED: photosystem I reaction center subunit IV B, chloroplastic [Camelina sativa]	0	94	2	180	7.22972e+06	0.198233	2.70783e+08	0.0694187	2.99681e+08	0.0831429	3.68237e+08	0.0794703	381928001	0.0725616	2.92813e+08	0.0780283
Csa_010413225.1	PREDICTED: 60S ribosomal protein L7a-2 [Camelina sativa]	0	123	2	256	1.02419e+07	0.197455	4.06105e+08	0.0732026	2.26243e+08	0.0441341	4.07998e+08	0.061911	5.34213e+08	0.0713629	3.33681e+08	0.062521
Csa_019092958.1	PREDICTED: 5-methyltetrahydropteroyltriglutamate--homocysteine methyltransferase 2-like isoform X2 [Camelina sativa]	0	74	0	184	7.29584e+06	0.195697	6.53926e+08	0.163998	4.04102e+08	0.109676	7.00167e+08	0.14782	6.28882e+08	0.116882	574355034	0.149726
Csa_010480169.1	PREDICTED: elongation factor 2 [Camelina sativa]	0	376	6	843	3.33209e+07	0.195082	1.49084e+09	0.0816076	9.11828e+08	0.0540161	1.35017e+09	0.0622172	1.36469e+09	0.0553611	9.89175e+08	0.0562833
Csa_010413860.1	PREDICTED: 50S ribosomal protein L28, chloroplastic [Camelina sativa]	0	14	3	143	5.63169e+06	0.19437	3.53366e+07	0.0114029	1.15553e+07	0.00403539	20354824	0.00552944	21670419	0.00518238	18166230	0.00609344
Csa_019092957.1	PREDICTED: 5-methyltetrahydropteroyltriglutamate--homocysteine methyltransferase 2-like isoform X1 [Camelina sativa]	0	74	0	197	7.29584e+06	0.182783	6.53926e+08	0.153176	4.04102e+08	0.102439	7.00167e+08	0.138066	6.28882e+08	0.109169	574355034	0.139845
Csa_010425563.1	PREDICTED: 50S ribosomal protein L12-3, chloroplastic-like [Camelina sativa]	0	441	0	187	6.72448e+06	0.177478	432632896	0.106759	3.71594e+08	0.0992353	7.82741e+08	0.162602	6.96229e+08	0.127323	3.31922e+08	0.0851389
Csa_010425561.1	PREDICTED: 50S ribosomal protein L12-1, chloroplastic [Camelina sativa]	0	441	0	191	6.72448e+06	0.173761	432632896	0.104524	3.71594e+08	0.097157	7.82741e+08	0.159197	6.96229e+08	0.124657	3.31922e+08	0.0833559
Csa_010474550.1	PREDICTED: chlorophyll a-b binding protein 3, chloroplastic-like [Camelina sativa]	0	27	0	115	3.88477e+06	0.166722	1.36239e+08	0.0546676	6.16251e+07	0.0267607	126502251	0.0427317	128221306	0.0381294	140681380	0.0586776
Csa_010414106.1	PREDICTED: 40S ribosomal protein S3-2-like [Camelina sativa]	0	240	4	250	8.38381e+06	0.165511	1.05006e+09	0.193822	5.40287e+08	0.107925	9.68333e+08	0.150465	1.19719e+09	0.163765	8.8925e+08	0.170615
Csa_010433975.1	PREDICTED: PGR5-like protein 1A, chloroplastic [Camelina sativa]	0	67	6	320	1.0597e+07	0.16344	9.26145e+07	0.0133554	1.09832e+08	0.0171402	1.26793e+08	0.015392	1.40367e+08	0.0150008	8.42295e+07	0.0126255
Csa_010434068.1	PREDICTED: probable plastid-lipid-associated protein 2, chloroplastic [Camelina sativa]	0	12	4	319	1.0075e+07	0.155877	1.63606e+07	0.00236666	2.13524e+07	0.00334267	2.00281e+07	0.00243892	2.38507e+07	0.00255687	1.12819e+07	0.0016964
Csa_010493770.1	PREDICTED: peroxisomal (S)-2-hydroxy-acid oxidase GLO5-like [Camelina sativa]	0	122	0	75	2.32185e+06	0.152792	4.51293e+08	0.277668	508051947	0.338287	5.77811e+08	0.299278	7.77171e+08	0.354367	5.45876e+08	0.349114
Csa_010420063.1	PREDICTED: 30S ribosomal protein S13, chloroplastic-like [Camelina sativa]	0	65	10	169	5.18149e+06	0.151319	2.45814e+08	0.0671195	204037727	0.0602923	2.78877e+08	0.0641027	2.87366e+08	0.0581496	2.27887e+08	0.0646794
Csa_010427985.1	PREDICTED: uncharacterized protein LOC104712726 [Camelina sativa]	0	63	9	291	8.9029e+06	0.150996	107700119	0.0170786	8.60156e+07	0.0147612	1.03452e+08	0.0138101	160567669	0.0188696	9.71119e+07	0.0160071
Csa_010422414.1	PREDICTED: oxygen-evolving enhancer protein 3-2, chloroplastic [Camelina sativa]	0	1055	11	230	7.01923e+06	0.150622	1.83243e+09	0.367644	2.48019e+09	0.538512	3.0136e+09	0.508988	3.09439e+09	0.460093	1.81845e+09	0.379234
Csa_010508915.1	PREDICTED: chlorophyll a-b binding protein CP29.3, chloroplastic [Camelina sativa]	0	126	9	303	9.21555e+06	0.150109	2.56723e+08	0.0390977	2.98173e+08	0.0491433	2.99468e+08	0.0383934	1.8837e+08	0.0212602	1.53248e+08	0.0242598
Csa_010465621.1	PREDICTED: photosystem I reaction center subunit VI-1, chloroplastic [Camelina sativa]	0	24	1	145	4383777	0.149213	11038534	0.00351295	22305204	0.00768204	16116604	0.00431773	12703219	0.00299601	14006086	0.00463322
Csa_019083114.1	PREDICTED: chaperonin 60 subunit alpha 1, chloroplastic [Camelina sativa]	0	791	34	587	1.73299e+07	0.145708	2.73106e+09	0.214694	2.35956e+09	0.200738	3.2073e+09	0.212252	4.05564e+09	0.236276	2.8081e+09	0.229461
Csa_010509364.1	PREDICTED: RNA-binding protein CP29B, chloroplastic [Camelina sativa]	0	93	9	292	8.538e+06	0.144311	3.7419e+08	0.0591341	1.7182e+08	0.0293852	2.51497e+08	0.033458	1.89474e+08	0.0221904	1.98717e+08	0.0326427
Csa_010420424.1	PREDICTED: uncharacterized protein LOC104706005 isoform X2 [Camelina sativa]	0	69	0	226	6.50672e+06	0.142096	2.18504e+08	0.0446148	2.36677e+08	0.0522981	2.13346e+08	0.0366713	1.97526e+08	0.0298892	1.64128e+08	0.0348344
Csa_010439586.1	PREDICTED: elongation factor Tu, chloroplastic [Camelina sativa]	0	673	3	485	1.38609e+07	0.141051	1.88327e+09	0.179184	2.04461e+09	0.210527	2.36499e+09	0.189425	2.5245e+09	0.178005	1.81105e+09	0.179111
Csa_010505428.1	PREDICTED: 30S ribosomal protein S31, chloroplastic-like [Camelina sativa]	0	31	4	118	3.32028e+06	0.138873	1.61551e+08	0.0631767	9.59267e+07	0.0405972	1.75134e+08	0.057655	130834671	0.0379174	1.20201e+08	0.0488608
Csa_010503753.1	PREDICTED: oxygen-evolving enhancer protein 1-2, chloroplastic-like [Camelina sativa]	0	976	10	336	9.41477e+06	0.138292	1.01613e+09	0.139552	1.0364e+09	0.154037	9.60277e+08	0.111021	1.01082e+09	0.102881	7.15761e+08	0.102179
Csa_010459748.1	PREDICTED: catalase-3 [Camelina sativa]	0	579	20	492	1.37585e+07	0.138017	2.00624e+09	0.188169	1.69747e+09	0.172296	2.68122e+09	0.211698	2.75195e+09	0.191282	1.7762e+09	0.173165
Csa_010469147.1	PREDICTED: transketolase-1, chloroplastic isoform X1 [Camelina sativa]	0	1430	28	742	2.02142e+07	0.134456	5.47765e+09	0.340658	6.4991e+09	0.437409	7.77249e+09	0.406917	7.86946e+09	0.362693	5.38979e+09	0.348419
Csa_019087264.1	PREDICTED: histone H3.3-like [Camelina sativa]	0.03	8	0	98	2.66758e+06	0.134344	1.87403e+07	0.00882426	2131970	0.00108641	44074024	0.0174705	53269984	0.0185889	37914974	0.0185575
Csa_010457490.1	PREDICTED: 50S ribosomal protein L28, chloroplastic-like [Camelina sativa]	0	10	0	142	3.851e+06	0.133848	8.48124e+06	0.00275613	7.51466e+06	0.00264277	13154846	0.00359871	16797194	0.00404526	1.38533e+07	0.00467948
Csa_010505623.1	PREDICTED: 60S ribosomal protein L23a-1 [Camelina sativa]	0	165	0	154	4.16887e+06	0.133606	4.02717e+08	0.120672	2.39488e+08	0.0776608	4.93294e+08	0.124433	6.33237e+08	0.140619	4.73718e+08	0.147548
Csa_010427292.1	PREDICTED: 60S ribosomal protein L23a-2 [Camelina sativa]	0	165	0	154	4.16887e+06	0.133606	4.02717e+08	0.120672	2.39488e+08	0.0776608	4.93294e+08	0.124433	6.33237e+08	0.140619	4.73718e+08	0.147548
Csa_010457366.1	PREDICTED: photosystem II repair protein PSB27-H1, chloroplastic-like [Camelina sativa]	0	88	4	173	4.62913e+06	0.132063	1.73673e+08	0.0463248	1.0279e+08	0.0296718	73164945	0.0164288	1.65285e+08	0.0326727	1.02533e+08	0.0284282
Csa_019094819.1	PREDICTED: polyubiquitin-like [Camelina sativa]	0	376	0	308	8.18609e+06	0.131175	1.71718e+09	0.257273	7.80469e+08	0.126544	1.54656e+09	0.195059	1.7738e+09	0.196948	1.30729e+09	0.203589
Csa_010416733.1	PREDICTED: 60S ribosomal protein L28-1 [Camelina sativa]	0	43	5	143	3.77181e+06	0.130179	1.27645e+08	0.0411905	5.61319e+07	0.0196025	1.23443e+08	0.0335336	1.36859e+08	0.0327291	1.32879e+08	0.0445712
Csa_010462061.1	PREDICTED: protein CURVATURE THYLAKOID 1C, chloroplastic [Camelina sativa]	0	18	0	156	4114186	0.130163	1.48913e+07	0.00440491	6.88471e+06	0.00220394	8890238	0.0022138	1.55959e+07	0.00341888	1.09961e+07	0.00338101
Csa_010500819.1	PREDICTED: protein CURVATURE THYLAKOID 1C, chloroplastic-like [Camelina sativa]	0	18	0	156	4114186	0.130163	1.48913e+07	0.00440491	6.88471e+06	0.00220394	8890238	0.0022138	1.55959e+07	0.00341888	1.09961e+07	0.00338101
Csa_010420975.1	PREDICTED: NAD(P)H-quinone oxidoreductase subunit U, chloroplastic [Camelina sativa]	0	13	5	219	5.7585e+06	0.129775	2.32677e+07	0.00490273	4.00893e+07	0.00914161	4.96656e+07	0.0088097	3.20742e+07	0.00500852	2.25059e+07	0.00492932
Csa_010435507.1	PREDICTED: defensin-like protein 3 [Camelina sativa]	0	137	0	79	2.06854e+06	0.12923	1.44887e+09	0.846312	1306332135	0.825781	2049996954	1.00804	2.12982e+09	0.921965	1.72746e+09	1.04885
Csa_010444888.1	PREDICTED: probable mediator of RNA polymerase II transcription subunit 36b isoform X2 [Camelina sativa]	0	30	0	278	7.24509e+06	0.128625	5.70313e+07	0.00946666	2.11201e+07	0.00379393	7.80729e+07	0.0109095	1.12179e+08	0.0137996	9.22953e+07	0.0159246
Csa_010479726.1	PREDICTED: protein CURVATURE THYLAKOID 1C, chloroplastic [Camelina sativa]	0	18	0	158	4114186	0.128515	1.48913e+07	0.00434915	6.88471e+06	0.00217604	8890238	0.00218578	1.55959e+07	0.0033756	1.09961e+07	0.00333822
Csa_010467178.1	PREDICTED: serine--glyoxylate aminotransferase-like [Camelina sativa]	0	205	11	454	1.14589e+07	0.12457	4.65489e+08	0.0473131	7.98236e+08	0.0878039	8.21419e+08	0.0702844	5.26653e+08	0.0396704	4.10174e+08	0.0433357
Csa_010509829.1	PREDICTED: 30S ribosomal protein S5, chloroplastic-like isoform X1 [Camelina sativa]	0	133	13	306	7.58907e+06	0.122404	3.95476e+08	0.0596385	2.45057e+08	0.039993	4.53301e+08	0.057546	504871814	0.0564232	3.66763e+08	0.0574907
Csa_010444885.1	PREDICTED: probable mediator of RNA polymerase II transcription subunit 36b isoform X1 [Camelina sativa]	0	37	1	313	7.73807e+06	0.122016	7.42262e+07	0.0109431	3.0388e+07	0.00484838	9.19289e+07	0.0114093	1.26636e+08	0.013836	1.10255e+08	0.0168961
Csa_010421234.2	PREDICTED: uncharacterized protein LOC104706719 [Camelina sativa]	0	80	5	215	5.23395e+06	0.120148	2.85939e+08	0.0613709	3.15056e+08	0.0731792	3.31847e+08	0.0599583	2.46356e+08	0.0391852	2.68833e+08	0.0599761
Csa_010429012.1	PREDICTED: triosephosphate isomerase, chloroplastic [Camelina sativa]	0	87	14	316	7.66458e+06	0.119709	2.66027e+08	0.0388479	1.09992e+08	0.0173825	4.32018e+08	0.0531085	3.41364e+08	0.0369427	3.38009e+08	0.0513068
Csa_010420423.1	PREDICTED: uncharacterized protein LOC104706005 isoform X1 [Camelina sativa]	0	69	0	273	6.50672e+06	0.117632	2.18504e+08	0.0369339	2.36677e+08	0.0432944	2.13346e+08	0.030358	1.97526e+08	0.0247434	1.64128e+08	0.0288373
Csa_010482002.1	PREDICTED: ATP-dependent zinc metalloprotease FTSH 5, chloroplastic-like isoform X1 [Camelina sativa]	0	244	8	710	1.69114e+07	0.117557	5.25986e+08	0.0341856	6.17184e+08	0.0434105	7.28733e+08	0.0398713	7.70484e+08	0.0371111	5.82787e+08	0.0393718
Csa_010416491.1	PREDICTED: defensin-like protein 1 [Camelina sativa]	0	74	0	90	2.06854e+06	0.113435	1.36404e+09	0.699377	1178964584	0.654179	1871844249	0.807936	1.96409e+09	0.746304	1.63921e+09	0.873628
Csa_010443004.1	PREDICTED: chlorophyll a-b binding protein 3, chloroplastic isoform X1 [Camelina sativa]	0	50	3	265	6.07765e+06	0.113192	2.05891e+08	0.0358525	8.34316e+07	0.0157226	2.09433e+08	0.0307008	1.79643e+08	0.0231826	1.9208e+08	0.0347672
Csa_010500213.1	PREDICTED: glyceraldehyde-3-phosphate dehydrogenase GAPB, chloroplastic [Camelina sativa]	0	1768	27	447	1.01097e+07	0.111624	7.10501e+09	0.733475	8.59011e+09	0.959687	8.92463e+09	0.775591	9.80111e+09	0.749835	7.45977e+09	0.800482
Csa_010510326.1	PREDICTED: histone H1.2-like [Camelina sativa]	0	14	4	276	6.2225e+06	0.111271	1.70975e+07	0.00285858	9.17322e+06	0.00165978	1.59435e+07	0.00224401	2.47456e+07	0.0030661	1.22125e+07	0.00212242
Csa_010464864.1	PREDICTED: 40S ribosomal protein S14-2-like isoform X1 [Camelina sativa]	0	135	9	151	3.39803e+06	0.111065	8.40586e+08	0.256882	4.6212e+08	0.152833	6.99723e+08	0.180011	1.07446e+09	0.243338	6.56908e+08	0.208671
Csa_010413891.1	PREDICTED: 36.4 kDa proline-rich protein-like [Camelina sativa]	0	88	0	272	6.04728e+06	0.109728	5.44051e+08	0.0922994	306771182	0.0563228	535861535	0.0765303	482818336	0.0607034	489041124	0.0862403
Csa_010497428.1	PREDICTED: ferredoxin--NADP reductase, leaf isozyme 1, chloroplastic-like, partial [Camelina sativa]	0	179	0	136	3.00758e+06	0.109145	5.21604e+08	0.176982	6.43048e+08	0.236125	9.74838e+08	0.278448	9.25151e+08	0.232633	8.5541e+08	0.301696
Csa_010446577.2	PREDICTED: histone H3-like centromeric protein CSE4 [Camelina sativa]	0	31	0	280	5.84459e+06	0.10302	9.16052e+07	0.015097	2.6969e+07	0.00481	9.56787e+07	0.0132742	1.49277e+08	0.0182319	8.58102e+07	0.0146999
Csa_019098008.1	PREDICTED: probable amino acid permease 7 isoform X3 [Camelina sativa]	0.015	29	1	404	8.41336e+06	0.102781	235206128	0.0268655	201868080	0.0249531	194464672	0.0186986	240859600	0.0203883	209377584	0.0248589
Csa_019085704.1	PREDICTED: defensin-like protein 4 [Camelina sativa]	0	147	2	100	2.06854e+06	0.102092	1.45405e+09	0.670978	1.31238e+09	0.655389	2062202314	0.80109	2.13958e+09	0.731689	1.73373e+09	0.831601
Csa_010413519.1	PREDICTED: 40S ribosomal protein S13-1 [Camelina sativa]	0	107	1	151	3.08865e+06	0.100953	5.46383e+08	0.166974	2.64552e+08	0.0874929	5.07949e+08	0.130675	7.65158e+08	0.173289	4.9637e+08	0.157675
Csa_010429707.1	PREDICTED: uncharacterized protein Os08g0359500-like [Camelina sativa]	0	45	5	240	4.88943e+06	0.100548	1.82282e+08	0.0350478	1.4532e+08	0.030238	1.98939e+08	0.0322001	1.5848e+08	0.0225819	1.44573e+08	0.0288942
Csa_010435449.1	PREDICTED: glutamine synthetase, chloroplastic/mitochondrial-like isoform X2 [Camelina sativa]	0	388	22	430	8.68731e+06	0.0997111	2.17046e+09	0.232922	1.93603e+09	0.224844	1.95073e+09	0.176229	1.74902e+09	0.139099	1.42345e+09	0.158784
Csa_010435004.1	PREDICTED: 60S ribosomal protein L27-3 [Camelina sativa]	0	41	2	135	2.68321e+06	0.0980953	1.31991e+08	0.0451168	51116326	0.0189088	143424201	0.0412704	2.05383e+08	0.052027	1.20592e+08	0.0428468
Csa_010488821.1	PREDICTED: pEARLI1-like lipid transfer protein 2 [Camelina sativa]	0	88	0	306	6.04728e+06	0.0975362	5.44051e+08	0.0820439	306771182	0.0500647	535861535	0.068027	482818336	0.0539586	489041124	0.0766581
Csa_010493908.2	PREDICTED: DEAD-box ATP-dependent RNA helicase 3, chloroplastic-like [Camelina sativa]	0	161	23	862	1.68957e+07	0.0967375	3.8079e+08	0.0203848	3.00783e+08	0.0174255	4.17235e+08	0.0188028	4.30044e+08	0.017061	3.10926e+08	0.0173015
Csa_010421722.1	PREDICTED: 30S ribosomal protein S1, chloroplastic-like [Camelina sativa]	0	223	21	416	8.06619e+06	0.0956978	5.55295e+08	0.0615968	5.68534e+08	0.0682499	6.43619e+08	0.0601015	8.96938e+08	0.0737339	6.28301e+08	0.0724449
Csa_010416079.1	PREDICTED: photosystem I reaction center subunit IV B, chloroplastic-like [Camelina sativa]	0	112	1	150	2.89726e+06	0.0953286	1.48077e+07	0.00455537	14161142	0.00471461	1.10383e+07	0.00285866	40532048	0.00924071	7.56262e+06	0.00241833
Csa_010414195.1	PREDICTED: ATP-dependent zinc metalloprotease FTSH 2, chloroplastic-like isoform X1 [Camelina sativa]	0	181	16	703	1.35104e+07	0.0948506	6.06609e+08	0.0398182	5.37177e+08	0.0381593	6.6005e+08	0.036473	6.06147e+08	0.0294863	4.69508e+08	0.0320348
Csa_010473862.1	PREDICTED: 3-ketoacyl-CoA thiolase 2, peroxisomal-like [Camelina sativa]	0	8	0	157	3.01661e+06	0.0948302	1.52765e+07	0.00449006	8.49267e+06	0.00270136	26363544	0.0065231	2.99182e+07	0.0065168	3.24278e+07	0.00990722
Csa_010423143.1	PREDICTED: uncharacterized protein LOC104708296 [Camelina sativa]	0	12	2	157	3.00766e+06	0.0945487	1.07108e+07	0.0031481	8.31809e+06	0.00264583	22639412	0.00560164	23949988	0.00521679	1.42298e+07	0.00434744
Csa_010493589.1	PREDICTED: polyubiquitin-like [Camelina sativa]	0	445	0	430	8.22009e+06	0.0943485	1.89747e+09	0.203626	9.0957e+08	0.105635	1.82622e+09	0.164981	2.15543e+09	0.171421	1.64632e+09	0.183645
Csa_010414920.1	PREDICTED: UPF0603 protein At1g54780, chloroplastic [Camelina sativa]	0	59	10	287	5.46192e+06	0.0939269	5.19043e+07	0.00834545	1.25602e+08	0.0218551	9.00517e+07	0.0121888	8.49603e+07	0.0101235	6.24183e+07	0.0104319
Csa_010433705.1	PREDICTED: 60S ribosomal protein L7a-1 [Camelina sativa]	0	72	0	257	4.85216e+06	0.0931814	2.00933e+08	0.0360783	1.20842e+08	0.0234814	2.12515e+08	0.0321223	2.40973e+08	0.0320651	1.47756e+08	0.0275768
Csa_019092871.1	PREDICTED: 40S ribosomal protein S5-2 isoform X1 [Camelina sativa]	0	85	2	221	4.09935e+06	0.0915482	3.466e+08	0.0723709	1.17384e+08	0.0265249	2.77848e+08	0.0488387	2.85932e+08	0.0442455	2.36298e+08	0.0512863
Csa_010420816.1	PREDICTED: probable plastid-lipid-associated protein 8, chloroplastic [Camelina sativa]	0	30	7	241	4.43299e+06	0.0907834	88901797	0.0170224	71310962	0.0147767	9.38843e+07	0.015133	1.04176e+08	0.0147825	9.16325e+07	0.0182375
Csa_019084369.1	PREDICTED: uncharacterized protein LOC104709852 [Camelina sativa]	0	26	0	303	5.49022e+06	0.089428	7.63668e+07	0.0116303	2.6969e+07	0.00444489	7.35553e+07	0.00943021	1.20943e+08	0.0136501	6.31754e+07	0.0100009
Csa_010450689.2	PREDICTED: magnesium-protoporphyrin IX monomethyl ester [oxidative] cyclase, chloroplastic-like [Camelina sativa]	0	35	0	133	2.35089e+06	0.0872385	9.04995e+07	0.0313995	7.22587e+07	0.0271317	93764110	0.0273864	8.37834e+07	0.0215429	55458901	0.0200011
Csa_010504908.1	PREDICTED: 60S ribosomal protein L18a-2 [Camelina sativa]	0	81	5	178	3.13453e+06	0.086912	354565395	0.0919188	1.62815e+08	0.0456786	3.40612e+08	0.0743344	4.23891e+08	0.081439	3.45876e+08	0.093204
Csa_010422957.1	PREDICTED: malate dehydrogenase, glyoxysomal-like [Camelina sativa]	0	299	11	358	6.12529e+06	0.0844443	7.99276e+08	0.103025	4.64662e+08	0.0648175	7.36097e+08	0.0798733	9.65327e+08	0.0922124	5.75184e+08	0.077065
Csa_010423867.1	PREDICTED: heat shock 70 kDa protein 18-like [Camelina sativa]	0	244	0	97	1.64016e+06	0.0834527	2.839e+08	0.135059	2.63004e+08	0.135403	3.98078e+08	0.159421	4.46243e+08	0.157325	3.16085e+08	0.156303
Csa_010477215.1	PREDICTED: histone H3-like 2 [Camelina sativa]	0.015	7	0	138	2.31547e+06	0.0828107	3.50236e+07	0.0117114	5.34525e+06	0.00193431	3.92254e+07	0.0110418	5.10898e+07	0.0126606	36624825	0.0127301
Csa_019084164.1	PREDICTED: uncharacterized protein Os08g0359500-like isoform X2 [Camelina sativa]	0	24	0	219	3.66001e+06	0.0824832	1.59683e+08	0.0336467	1.14511e+08	0.026112	1.6888e+08	0.029956	1.26803e+08	0.0198008	1.16182e+08	0.0254465
Csa_010431660.1	PREDICTED: 30S ribosomal protein S17, chloroplastic-like, partial [Camelina sativa]	0	98	3	173	2.88694e+06	0.0823603	1.60474e+08	0.0428041	1.41609e+08	0.0408773	1.99566e+08	0.0448115	2.41183e+08	0.0476759	1.68509e+08	0.0467209
Csa_010449596.1	PREDICTED: 50S ribosomal protein L19-1, chloroplastic [Camelina sativa]	0	21	2	227	3.77148e+06	0.0819997	119304024	0.0242525	9.09837e+07	0.0200159	7.291e+07	0.012477	8.03495e+07	0.0121047	6.24632e+07	0.0131987
Csa_019093208.1	PREDICTED: histone H3.3-like [Camelina sativa]	0.006	12	0	161	2.66984e+06	0.0818437	5.0262e+07	0.0144059	5.34525e+06	0.00165798	6.13488e+07	0.0148023	7.94241e+07	0.0168704	59259645	0.017655
Csa_010474870.1	PREDICTED: uncharacterized protein OsI_027940-like [Camelina sativa]	0.007	3	0	217	3592829	0.0817153	55707702	0.0118463	5.13136e+07	0.0118089	7.41261e+07	0.0132697	3.60173e+07	0.0056761	3.38969e+07	0.00749264
Csa_010487198.1	PREDICTED: protein FLUORESCENT IN BLUE LIGHT, chloroplastic [Camelina sativa]	0	22	5	300	4.90884e+06	0.0807578	2.60514e+07	0.00400718	2.24294e+07	0.00373367	2.45064e+07	0.00317328	2.97418e+07	0.00339035	87232962	0.0139474
Csa_019083431.1	PREDICTED: 60S ribosomal protein L30-2 isoform X1 [Camelina sativa]	0	144	1	115	1.87094e+06	0.0802951	1.0143e+08	0.0407004	2.24527e+08	0.0975011	2.42793e+08	0.082014	1.80116e+08	0.0535616	80936389	0.0337582
Csa_010443959.1	PREDICTED: ribulose-phosphate 3-epimerase, chloroplastic [Camelina sativa]	0	231	9	281	4.48293e+06	0.0787376	4.03591e+08	0.066277	6.09979e+08	0.108404	5.30435e+08	0.073329	4.1844e+08	0.0509243	3.45708e+08	0.0590116
Csa_010425375.1	PREDICTED: glyceraldehyde-3-phosphate dehydrogenase GAPA1, chloroplastic isoform X1 [Camelina sativa]	0	936	5	400	6.3159e+06	0.0779295	2.09802e+09	0.242035	2.11674e+09	0.264269	2988312779	0.290212	2.13892e+09	0.182866	1.87888e+09	0.225306
Csa_010422762.2	PREDICTED: uncharacterized protein LOC104707989 [Camelina sativa]	0	126	8	985	1.52765e+07	0.0765447	2.04388e+08	0.0095752	1.30042e+08	0.00659302	2.34068e+08	0.00923116	2.55645e+08	0.00887562	1.64701e+08	0.00802037
Csa_010426929.1	PREDICTED: peroxiredoxin-2E, chloroplastic [Camelina sativa]	0	146	15	233	3.60077e+06	0.0762721	4.05506e+08	0.08031	3.6039e+08	0.0772424	5.54999e+08	0.0925307	6.65153e+08	0.0976256	4.86075e+08	0.100065
Csa_010451655.1	PREDICTED: polyubiquitin 4-like [Camelina sativa]	0	376	0	534	8.18609e+06	0.0756592	1.71718e+09	0.148389	7.80469e+08	0.0729882	1.54656e+09	0.112506	1.7738e+09	0.113596	1.30729e+09	0.117426
Csa_010415415.1	PREDICTED: glycerate dehydrogenase HPR, peroxisomal [Camelina sativa]	0	187	23	386	5.72779e+06	0.0732363	6.57467e+08	0.0785986	6.56713e+08	0.0849624	8.6163e+08	0.0867128	8.58765e+08	0.0760826	7.36134e+08	0.0914752
Csa_010489717.1	PREDICTED: ADP,ATP carrier protein 1, mitochondrial-like [Camelina sativa]	0	189	0	314	4.59848e+06	0.0722789	9.07603e+08	0.133381	5.74463e+08	0.0913631	1.01074e+09	0.125043	1.20708e+09	0.131464	8.08227e+08	0.123463
Csa_010415746.1	PREDICTED: 60S ribosomal protein L27a-3 [Camelina sativa]	0	31	7	146	2.135e+06	0.0721723	1.10305e+08	0.0348633	8.45288e+07	0.0289128	1.06375e+08	0.0283033	1.68274e+08	0.0394152	8.84749e+07	0.029067
Csa_010425376.1	PREDICTED: glyceraldehyde-3-phosphate dehydrogenase A, chloroplastic isoform X2 [Camelina sativa]	0	782	0	317	4.57255e+06	0.0711911	1.32879e+09	0.193431	1.26064e+09	0.198596	2.07985e+09	0.254872	1.39845e+09	0.150864	1.13009e+09	0.170997
Csa_010467756.1	PREDICTED: protein THYLAKOID FORMATION 1, chloroplastic [Camelina sativa]	0	50	7	303	4.36277e+06	0.0710634	1.84126e+08	0.0280414	1.44269e+08	0.0237777	193769186	0.0248423	320016635	0.0361184	186152344	0.0294686
Csa_010416877.1	PREDICTED: fructose-bisphosphate aldolase 1, chloroplastic [Camelina sativa]	0	1101	12	399	5.7152e+06	0.0706944	1069692147	0.123713	1.15713e+09	0.144827	1.3374e+09	0.130208	1690523809	0.144893	1.29576e+09	0.155771
Csa_010420526.2	PREDICTED: 5-methyltetrahydropteroyltriglutamate--homocysteine methyltransferase 1 [Camelina sativa]	0	474	11	765	1.08698e+07	0.0701276	2.05653e+09	0.124051	1.07329e+09	0.0700641	2.07693e+09	0.105466	1.74477e+09	0.0779966	1.56132e+09	0.0978959
Csa_019082575.1	PREDICTED: peroxisomal (S)-2-hydroxy-acid oxidase GLO5-like [Camelina sativa]	0	140	0	196	2.76916e+06	0.0697299	4.87209e+08	0.114706	523926296	0.133491	6.23903e+08	0.123655	8.29084e+08	0.144657	5.87578e+08	0.143795
Csa_010420870.1	PREDICTED: 40S ribosomal protein S8-1 [Camelina sativa]	0	405	8	223	3.14082e+06	0.0695129	6.74607e+08	0.139596	6.48765e+08	0.145285	7.54405e+08	0.131416	9.82725e+08	0.150704	5.77369e+08	0.124189
Csa_010457375.1	PREDICTED: protochlorophyllide reductase C, chloroplastic isoform X1 [Camelina sativa]	0	68	10	402	5.62535e+06	0.0690638	1.98879e+08	0.0228292	1.11192e+08	0.013813	2.021e+08	0.0195295	3.01797e+08	0.0256736	1.73827e+08	0.0207407
Csa_010432832.1	PREDICTED: 40S ribosomal protein S6-1 [Camelina sativa]	0	217	12	250	3.45667e+06	0.0682409	824376589	0.152165	3.59342e+08	0.0717805	9.48547e+08	0.14739	1.0762e+09	0.147214	7.5209e+08	0.144299
Csa_010465338.1	PREDICTED: peroxisomal (S)-2-hydroxy-acid oxidase GLO1 isoform X1 [Camelina sativa]	0	605	1	371	5.10377e+06	0.067896	1.65575e+09	0.205944	1.39971e+09	0.188409	1.94512e+09	0.203668	2.1673e+09	0.199776	1.5899e+09	0.205556
Csa_010502502.1	PREDICTED: peroxiredoxin Q, chloroplastic isoform X1 [Camelina sativa]	0	111	12	219	3.00705e+06	0.0677678	4.53901e+08	0.0956413	3.29413e+08	0.0751164	5.44478e+08	0.0965798	4.86696e+08	0.0759997	4.59802e+08	0.100707
Csa_010422777.1	PREDICTED: protein CURVATURE THYLAKOID 1A, chloroplastic-like [Camelina sativa]	0	217	9	167	2.28369e+06	0.0674913	4.14706e+08	0.114591	5.1909e+08	0.155226	5.36082e+08	0.124699	6.13848e+08	0.125702	3.99404e+08	0.114717
Csa_010419864.1	PREDICTED: polyubiquitin-like [Camelina sativa]	0	445	0	609	8.22009e+06	0.0666171	1.89747e+09	0.143776	9.0957e+08	0.074586	1.82622e+09	0.116489	2.15543e+09	0.121036	1.64632e+09	0.129667
Csa_010502067.1	PREDICTED: fructose-bisphosphate aldolase 3, chloroplastic [Camelina sativa]	0	283	14	394	5.23981e+06	0.0656366	1.62462e+09	0.190276	1.58592e+09	0.201012	1.41564e+09	0.139574	1.65013e+09	0.143226	1.28789e+09	0.156789
Csa_010425922.1	PREDICTED: 50S ribosomal protein L9, chloroplastic [Camelina sativa]	0	243	10	197	2.60642e+06	0.0652987	3.65292e+08	0.0855662	3.71755e+08	0.0942386	3.54016e+08	0.0698081	5.26335e+08	0.0913681	3.12789e+08	0.0761585
Csa_019087615.1	PREDICTED: chaperone protein ClpC1, chloroplastic-like [Camelina sativa]	0	269	0	741	9.77117e+06	0.0650811	9.01967e+08	0.0561695	7.80016e+08	0.0525683	1.13823e+09	0.0596705	1.40488e+09	0.0648363	1.05939e+09	0.0685758
Csa_010474522.1	PREDICTED: 30S ribosomal protein S17, chloroplastic-like [Camelina sativa]	0	16	0	101	1.32364e+06	0.064681	48980375	0.0223784	5.64935e+07	0.0279329	5.79298e+07	0.0222808	9.04879e+07	0.0306385	6.25923e+07	0.0297258
Csa_010465339.1	PREDICTED: peroxisomal (S)-2-hydroxy-acid oxidase GLO1 isoform X2 [Camelina sativa]	0	529	0	364	4.72411e+06	0.0640539	1.6189e+09	0.205233	1296349002	0.177852	1.89131e+09	0.201842	2.12303e+09	0.199459	1.57179e+09	0.207123
Csa_010426161.1	PREDICTED: uncharacterized protein LOC104711177 [Camelina sativa]	0	148	4	116	1.50412e+06	0.0639957	2.12711e+08	0.0846176	1.78592e+08	0.0768851	2.87919e+08	0.0964189	2.42167e+08	0.0713929	1.31676e+08	0.0544481
Csa_019101033.1	PREDICTED: outer envelope membrane protein 7-like [Camelina sativa]	0	63	3	71	919203	0.0638969	1.18852e+08	0.0772461	9.69041e+07	0.0681588	1.23227e+08	0.0674215	1.42646e+08	0.0687067	1.01835e+08	0.0687978
Csa_010502017.1	PREDICTED: eukaryotic initiation factor 4A-2-like [Camelina sativa]	0	83	0	271	3.49439e+06	0.0636399	3.91465e+08	0.0666579	2.60709e+08	0.0480424	3.89883e+08	0.0558876	5.22108e+08	0.0658854	3.13017e+08	0.0554029
Csa_010425679.1	PREDICTED: 60S ribosomal protein L34-3 [Camelina sativa]	0	26	2	120	1.54451e+06	0.0635238	1.64893e+08	0.0634086	6.60713e+07	0.027496	133450125	0.0432004	1.79676e+08	0.0512045	1.20417e+08	0.0481328
Csa_010462544.1	PREDICTED: ADP,ATP carrier protein 1, mitochondrial [Camelina sativa]	0	283	3	381	4.87202e+06	0.0631118	1.00442e+09	0.121652	6.32972e+08	0.0829656	1.09739e+09	0.111888	1.27856e+09	0.114761	8.72886e+08	0.109892
Csa_010442575.1	PREDICTED: chaperone protein ClpC1, chloroplastic-like [Camelina sativa]	0	539	6	929	1.18067e+07	0.0627248	1.60858e+09	0.0799014	1.28998e+09	0.0693437	1.86029e+09	0.0777883	2.22956e+09	0.0820733	1.59627e+09	0.0824182
Csa_010415143.1	PREDICTED: peroxiredoxin-2B [Camelina sativa]	0	53	7	162	2.04623e+06	0.06234	1.707e+08	0.0486237	1.49866e+08	0.0461982	1.9211e+08	0.0460666	1.79974e+08	0.0379921	1.26411e+08	0.0374288
Csa_010421581.1	PREDICTED: 60S ribosomal protein L9-1 [Camelina sativa]	0	240	8	194	2.4397e+06	0.0620672	9.4934e+08	0.225813	7.02007e+08	0.180708	1.07395e+09	0.215047	1.08507e+09	0.191273	8.85651e+08	0.218975
Csa_010502610.1	PREDICTED: 30S ribosomal protein S20, chloroplastic [Camelina sativa]	0	57	5	203	2.55245e+06	0.0620566	1.16777e+08	0.0265455	9.06674e+07	0.0223045	1.22173e+08	0.0233792	1.96999e+08	0.0331868	1.29557e+08	0.0306126
Csa_010461217.1	PREDICTED: uncharacterized protein LOC104741967 [Camelina sativa]	0	12	3	176	2.18985e+06	0.0614086	5.98451e+07	0.0156908	5.64873e+07	0.0160279	5.38451e+07	0.0118846	7.47401e+07	0.0145224	60538624	0.0164989
Csa_010460161.1	PREDICTED: serine/arginine-rich splicing factor RSZ21 isoform X1 [Camelina sativa]	0.007	13	0	188	2.30934e+06	0.0606257	26300650	0.0064556	15476226	0.00411098	23993758	0.00495781	3.10615e+07	0.00565019	24285748	0.00619623
Csa_010416357.1	PREDICTED: 30S ribosomal protein S9, chloroplastic-like [Camelina sativa]	0	6	3	209	2.56024e+06	0.0604591	996814	0.000220088	1.57367e+06	0.000376015	5.46415e+07	0.0101561	5.29896e+07	0.00867046	3.98797e+07	0.00915248
Csa_010465264.1	PREDICTED: eukaryotic initiation factor 4A-1 [Camelina sativa]	0	231	5	412	4.91598e+06	0.0588897	7.33093e+08	0.0821088	5.83573e+08	0.0707353	7.77118e+08	0.0732723	9.04774e+08	0.0751002	5.85478e+08	0.0681628
Csa_010469305.2	PREDICTED: 60S ribosomal protein L38 isoform X1 [Camelina sativa]	0	51	3	69	818514	0.0585469	2.95709e+08	0.197762	1.48683e+08	0.10761	2.73226e+08	0.153824	2.68949e+08	0.133296	2.03688e+08	0.141596
Csa_010506034.1	PREDICTED: rhodanese-like domain-containing protein 9, chloroplastic [Camelina sativa]	0	28	6	234	2.75676e+06	0.0581446	2.89771e+07	0.00571435	7.14916e+07	0.0152573	4.98212e+07	0.00827082	5.79519e+07	0.00846934	3.58212e+07	0.00734274
Csa_010499750.1	PREDICTED: phosphoribulokinase, chloroplastic-like [Camelina sativa]	0	659	23	396	4.64587e+06	0.0579027	1.52636e+09	0.177864	1.40622e+09	0.177336	1.57629e+09	0.154629	1.5566e+09	0.134425	1.24219e+09	0.150462
Csa_010417215.1	PREDICTED: serine/arginine-rich splicing factor RSZ22A [Camelina sativa]	0	17	2	197	2.30934e+06	0.057856	2.69e+07	0.00630107	1.58687e+07	0.00402266	2.50421e+07	0.00493804	3.19408e+07	0.0055447	2.5561e+07	0.00622365
Csa_010419564.1	PREDICTED: 40S ribosomal protein S20-2-like [Camelina sativa]	0	86	6	122	1.42492e+06	0.0576446	6.6904e+08	0.253058	4.70305e+08	0.192512	7.04716e+08	0.22439	8.59751e+08	0.240997	6.04697e+08	0.237745
Csa_010511017.1	PREDICTED: thionin-like isoform X1 [Camelina sativa]	0	32	0	129	1.49325e+06	0.0571308	1.67672e+08	0.0599791	1.14539e+08	0.0443407	2.48272e+08	0.0747631	3.10995e+08	0.0824446	2.30422e+08	0.0856777
Csa_010454547.1	PREDICTED: thionin isoform X1 [Camelina sativa]	0	32	0	129	1.49325e+06	0.0571308	1.67672e+08	0.0599791	1.14539e+08	0.0443407	2.48272e+08	0.0747631	3.10995e+08	0.0824446	2.30422e+08	0.0856777
Csa_010505199.1	PREDICTED: bifunctional enolase 2/transcriptional activator [Camelina sativa]	0	328	13	444	5.05057e+06	0.0561415	7.29311e+08	0.075798	6.18945e+08	0.0696158	9.0822e+08	0.0794618	9.87251e+08	0.0760401	6.85413e+08	0.0740463
Csa_010464668.1	PREDICTED: peptidyl-prolyl cis-trans isomerase FKBP16-4, chloroplastic [Camelina sativa]	0	27	7	230	2.61102e+06	0.0560286	2.36175e+07	0.00473843	22845823	0.00496041	2.32965e+07	0.00393472	2.91662e+07	0.0043366	2.13672e+07	0.00445609
Csa_019084783.1	PREDICTED: protein plastid transcriptionally active 16, chloroplastic-like isoform X2 [Camelina sativa]	0	107	8	523	5.90204e+06	0.0556964	1.52905e+08	0.0134911	1.47522e+08	0.0140862	1.43491e+08	0.0106579	2.32283e+08	0.0151885	1.61897e+08	0.0148481
Csa_010458213.1	PREDICTED: uncharacterized protein LOC104739524 [Camelina sativa]	0	5	3	176	1.96072e+06	0.0549831	22272030	0.00583949	3.53543e+07	0.0100315	1.96876e+07	0.00434541	12273145	0.00238474	15048401	0.00410121
Csa_001289901.1	uncharacterized protein LOC104746256 [Camelina sativa]	0	279	9	377	4.12203e+06	0.0539631	9.41089e+08	0.115191	6.9608e+08	0.0922054	1.05184e+09	0.108382	1.09175e+09	0.0990334	8.27563e+08	0.105292
Csa_010494605.1	PREDICTED: thionin isoform X1 [Camelina sativa]	0	18	0	137	1.49325e+06	0.0537947	161375904	0.0543558	110072552	0.0401233	244168480	0.0692339	308128544	0.0769147	228125920	0.0798708
Csa_010424860.1	PREDICTED: 60S ribosomal protein L7-2 [Camelina sativa]	0	118	5	242	2.63411e+06	0.0537212	4.59662e+08	0.0876499	2.48292e+08	0.0512373	4.53068e+08	0.0727274	6.26889e+08	0.0885876	3.88776e+08	0.0770581
Csa_010423791.1	PREDICTED: 40S ribosomal protein S23-2 [Camelina sativa]	0	41	2	142	1.53455e+06	0.0533358	1.36551e+08	0.0443746	8.34158e+07	0.0293358	1.32789e+08	0.0363265	1.37647e+08	0.0331494	1.38131e+08	0.0466593
Csa_010464620.1	PREDICTED: 40S ribosomal protein S23-1-like [Camelina sativa]	0	39	0	142	1.53455e+06	0.0533358	134282338	0.0436374	8.31987e+07	0.0292595	132529457	0.0362555	1.37579e+08	0.0331332	1.38011e+08	0.0466185
Csa_010416215.1	PREDICTED: uncharacterized protein LOC104702090 [Camelina sativa]	0	17	3	215	2313077	0.053098	27065937	0.00580915	23888208	0.0055486	36549577	0.0066038	39493833	0.00628187	41967398	0.00936284
Csa_010417152.1	PREDICTED: 50S ribosomal protein L35, chloroplastic [Camelina sativa]	0	11	1	145	1549355	0.0527363	48060908	0.0152951	57460124	0.0197896	54764052	0.0146716	45336324	0.0106924	19414718	0.00642239
Csa_010435624.1	PREDICTED: beta carbonic anhydrase 1, chloroplastic [Camelina sativa]	0	1587	14	345	3.65416e+06	0.0522752	2.88551e+09	0.38595	4.51396e+09	0.653397	4.29787e+09	0.483932	3.79736e+09	0.37641	2.87628e+09	0.399894
Csa_010433228.1	PREDICTED: ADP,ATP carrier protein 3, mitochondrial-like [Camelina sativa]	0	116	0	380	4.00633e+06	0.0520343	4.77958e+08	0.058041	3.11934e+08	0.0409937	4.5675e+08	0.0466923	7.05103e+08	0.0634552	4.07909e+08	0.0514888
Csa_019082829.1	PREDICTED: adenine DNA glycosylase-like isoform X6 [Camelina sativa]	0	46	3	156	1.62809e+06	0.0515086	132216871	0.0391102	1.537e+08	0.0492025	1.0498e+08	0.0261416	1.70419e+08	0.0373587	8.20459e+07	0.025227
Csa_019097656.1	PREDICTED: probable mediator of RNA polymerase II transcription subunit 37e isoform X2 [Camelina sativa]	0	982	7	652	6.7504e+06	0.0510986	2.53995e+09	0.179766	1.97329e+09	0.151141	2.95959e+09	0.176333	3.52503e+09	0.18489	2.45824e+09	0.180847
Csa_010416036.1	PREDICTED: eukaryotic initiation factor 4A-3 [Camelina sativa]	0	187	0	414	4.2493e+06	0.0506575	6.38939e+08	0.0712176	5.30724e+08	0.0640186	7.12617e+08	0.066866	7.95322e+08	0.0656963	5.29505e+08	0.0613485
Csa_010444826.2	PREDICTED: ferredoxin--NADP reductase, leaf isozyme 1, chloroplastic [Camelina sativa]	0	462	13	363	3.71364e+06	0.0504918	1.59627e+09	0.202922	1.35443e+09	0.186332	1.86709e+09	0.199806	1.8581e+09	0.175049	1.56692e+09	0.207049
Csa_010435212.1	PREDICTED: adenosylhomocysteinase 1 [Camelina sativa]	0	693	37	485	4.89736e+06	0.0498365	2.64211e+09	0.251384	1.4714e+09	0.151505	2.79214e+09	0.223638	3651938843	0.257502	2.67677e+09	0.26473
Csa_010427764.1	PREDICTED: ketol-acid reductoisomerase, chloroplastic [Camelina sativa]	0	206	16	591	5.88218e+06	0.0491222	5.70054e+08	0.0445099	5.35269e+08	0.0452297	6.61235e+08	0.0434628	6.0741e+08	0.0351473	4.34352e+08	0.0352523
Csa_010442005.1	PREDICTED: 40S ribosomal protein S15-5 [Camelina sativa]	0	4	1	152	1.49302e+06	0.0484785	1.39911e+07	0.00424754		0		0	1.34635e+07	0.00302909	1.34814e+07	0.00425428
Csa_010442270.1	PREDICTED: uncharacterized protein At5g48480-like [Camelina sativa]	0	18	6	174	1.70702e+06	0.048419	4.09342e+07	0.0108559	3.90983e+06	0.00112214	5.64313e+07	0.0125986	87128895	0.0171242	5.2714e+07	0.0145315
Csa_010427219.1	PREDICTED: chlorophyll a-b binding protein 6, chloroplastic isoform X2 [Camelina sativa]	0	54	0	164	1.60708e+06	0.0483639	2.15987e+08	0.0607731	2.51798e+08	0.0766738	2.50482e+08	0.0593312	3.3093e+08	0.0690065	2.54701e+08	0.0744939
Csa_010431822.1	PREDICTED: peptidyl-prolyl cis-trans isomerase CYP18-3 [Camelina sativa]	0	86	4	173	1.67605e+06	0.0478153	1.9263e+08	0.0513814	1.5102e+08	0.043594	232045133	0.0521046	3.47854e+08	0.0687622	2.37809e+08	0.0659349
Csa_010420178.1	PREDICTED: 40S ribosomal protein S9-1 [Camelina sativa]	0	154	4	198	1.91278e+06	0.047679	2.19228e+08	0.0510927	1.53038e+08	0.0385986	3.19429e+08	0.06267	2.7892e+08	0.048174	1.80751e+08	0.0437875
Csa_010427217.1	PREDICTED: chlorophyll a-b binding protein 6, chloroplastic isoform X1 [Camelina sativa]	0	126	6	241	2.3263e+06	0.0476405	5.28752e+08	0.101242	6.48732e+08	0.134427	6.11565e+08	0.0985769	6.22733e+08	0.0883656	4.92839e+08	0.0980894
Csa_010475192.1	PREDICTED: 50S ribosomal protein L6, chloroplastic [Camelina sativa]	0	102	10	224	2.16101e+06	0.0476141	3.03423e+08	0.0625069	2.97529e+08	0.0663314	2.87728e+08	0.049898	2.7817e+08	0.0424679	2.02224e+08	0.0433031
Csa_010434548.1	PREDICTED: peroxisomal (S)-2-hydroxy-acid oxidase GLO5-like [Camelina sativa]	0	293	0	368	3.51882e+06	0.0471928	7.66711e+08	0.0961418	8.01557e+08	0.108774	9.953e+08	0.105064	1.14687e+09	0.106577	8.10722e+08	0.105672
Csa_010416278.1	PREDICTED: 60S ribosomal protein L35a-3 [Camelina sativa]	0	97	2	112	1.06864e+06	0.0470914	2.46821e+08	0.101693	1.37592e+08	0.0613498	382477504	0.132659	3.95774e+08	0.120845	2.96997e+08	0.127194
Csa_010457870.1	PREDICTED: 60S ribosomal protein L35a-1 [Camelina sativa]	0	80	0	112	1.06864e+06	0.0470914	2.0423e+08	0.0841454	9.10452e+07	0.0405955	292845640	0.101571	3.18503e+08	0.0972508	2.64638e+08	0.113336
Csa_010457265.1	PREDICTED: 60S ribosomal protein L19-1 [Camelina sativa]	0	125	4	215	2.02325e+06	0.0464448	2.67835e+08	0.0574854	160449904	0.0372683	3.27425e+08	0.0591594	4.34778e+08	0.0691556	2.99632e+08	0.0668473
Csa_010458216.1	PREDICTED: chloroplast stem-loop binding protein of 41 kDa b, chloroplastic [Camelina sativa]	0	693	21	379	3.55233e+06	0.0462595	1.3612e+09	0.165734	1.89708e+09	0.249968	1.93118e+09	0.19794	2.10219e+09	0.189684	1.29034e+09	0.163305
Csa_010504905.1	PREDICTED: uncharacterized protein At2g34460, chloroplastic-like [Camelina sativa]	0	21	7	282	2.63912e+06	0.0461887	44076814	0.00721256	5.32716e+07	0.00943376	8.66549e+07	0.011937	5.9288e+07	0.00718978	4.71629e+07	0.00802205
Csa_010434046.1	PREDICTED: putative lipid-binding protein AIR1B [Camelina sativa]	0.006	1	1	114	1.06633e+06	0.046165	6.92296e+06	0.0028023		0	8511136	0.00290023	5.4444e+06	0.00163321	5.52209e+06	0.00232345
Csa_010435779.1	PREDICTED: uncharacterized protein LOC104719534 [Camelina sativa]	0	33	5	288	2.63878e+06	0.0452206	8.43578e+07	0.0135164	1.06137e+08	0.018404	9.4556e+07	0.012754	1.25957e+08	0.0149565	9.14123e+07	0.0152246
Csa_010500023.1	PREDICTED: 30S ribosomal protein S10, chloroplastic [Camelina sativa]	0	47	7	192	1.71506e+06	0.0440864	2.49684e+08	0.0600091	1.36053e+08	0.0353871	2.05907e+08	0.04166	206084297	0.0367064	1.7476e+08	0.043659
Csa_010515031.1	PREDICTED: uncharacterized protein LOC104790932 [Camelina sativa]	0	63	2	128	1.12116e+06	0.0432301	9.33136e+07	0.0336405	1.25104e+08	0.0488091	1.29667e+08	0.0393522	1.26634e+08	0.0338329	5.81762e+07	0.0218007
Csa_010470232.1	PREDICTED: thionin-like [Camelina sativa]	0	25	3	136	1.18684e+06	0.0430706	4.20571e+07	0.0142702	18933748	0.00695242	4.90856e+07	0.0140206	5.66007e+07	0.0142325	3.48172e+07	0.0122797
Csa_010466676.1	PREDICTED: probable plastid-lipid-associated protein 6, chloroplastic [Camelina sativa]	0	21	6	280	2.43499e+06	0.0429206	4.09625e+07	0.00675082	5.22395e+07	0.00931707	1.07272e+08	0.0148825	102305386	0.0124951	8.05481e+07	0.0137985
Csa_010459760.1	PREDICTED: high mobility group B protein 3 [Camelina sativa]	0	13	0	141	1.21766e+06	0.0426219	48174348	0.0157661	22650451	0.00802225	48511982	0.0133653	82138474	0.0199217	58291682	0.0198299
Csa_010423854.1	PREDICTED: probable mediator of RNA polymerase II transcription subunit 37c [Camelina sativa]	0	244	0	190	1.64016e+06	0.0426048	2.839e+08	0.068951	2.63004e+08	0.0691269	3.98078e+08	0.0813889	4.46243e+08	0.0803186	3.16085e+08	0.0797966
Csa_010412694.1	PREDICTED: protein PROTON GRADIENT REGULATION 5, chloroplastic [Camelina sativa]	0	8	2	133	1.13169e+06	0.0419957	1.8086e+07	0.00627506	2.40836e+07	0.00904291	24207986	0.00707061	1.87747e+07	0.00482746	1.73052e+07	0.00624106
Csa_010459761.1	PREDICTED: high mobility group B protein 2 [Camelina sativa]	0	13	0	144	1.21766e+06	0.041734	48174348	0.0154377	22650451	0.00785512	48511982	0.0130869	82138474	0.0195066	58291682	0.0194168
Csa_010420587.1	PREDICTED: 40S ribosomal protein S16-3-like [Camelina sativa]	0	53	3	146	1.21549e+06	0.041089	3.03969e+08	0.0960737	1.30284e+08	0.0445632	2.65307e+08	0.0705904	4.137e+08	0.0969015	2.76362e+08	0.0907943
Csa_010479285.1	PREDICTED: putative DNA-binding protein At1g48610 [Camelina sativa]	0	14	3	213	1.76971e+06	0.0410063	2.43867e+07	0.00528325	1.35457e+07	0.00317586	2.74564e+07	0.00500741	2.73341e+07	0.00438858	1.96855e+07	0.00443304
Csa_010466918.1	PREDICTED: 60S ribosomal protein L13a-2-like isoform X1 [Camelina sativa]	0	350	4	206	1.66424e+06	0.0398727	4.70753e+08	0.105452	3.19679e+08	0.0774971	6.07661e+08	0.114589	6.7803e+08	0.112559	3.54472e+08	0.082537
Csa_010452531.1	PREDICTED: sorting nexin 1-like [Camelina sativa]	0.021	5	2	404	3.25965e+06	0.0398213		0		0		0	3.95175e+06	0.000334508	6.48678e+06	0.000770161
Csa_010429090.1	PREDICTED: glycine-rich RNA-binding protein GRP1A-like [Camelina sativa]	0	461	6	175	1.41179e+06	0.0398161	1.06227e+09	0.280108	5.36711e+08	0.153158	9.1351e+08	0.20278	7.79524e+08	0.152331	5.32642e+08	0.145993
Csa_010433754.1	PREDICTED: AP-4 complex subunit mu [Camelina sativa]	0	19	3	451	3.59876e+06	0.0393825	5.79947e+08	0.059339	4.36296e+08	0.0483107	9.81024e+08	0.0844993	1299307710	0.0985221	803581225	0.0854648
Csa_019096639.1	PREDICTED: nucleolar protein 56-like isoform X1 [Camelina sativa]	0.001	5	0	191	1.52233e+06	0.039337	4.68811e+06	0.00113264	1.28684e+06	0.000336457	7.0333e+06	0.00143046	9753860	0.00174639	4.96713e+06	0.0012474
Csa_010465334.1	PREDICTED: peroxisomal (S)-2-hydroxy-acid oxidase GLO2 isoform X2 [Camelina sativa]	0	549	9	360	2.86778e+06	0.039316	470703190	0.0603355	3.50404e+08	0.0486077	5.36946e+08	0.0579399	472583456	0.0448925	3.88201e+08	0.0517235
Csa_010413914.1	PREDICTED: 3-ketoacyl-CoA thiolase 2, peroxisomal [Camelina sativa]	0	23	1	462	3.67073e+06	0.0392136	5.2497e+07	0.00524349	7.18072e+07	0.00776184	99795683	0.00839111	70826864	0.00524269	5.45319e+07	0.00566164
Csa_010413120.1	PREDICTED: peptidyl-prolyl cis-trans isomerase Pin1 [Camelina sativa]	0	12	6	119	938805	0.0389364	60108750	0.0233087	3.03591e+07	0.0127403	8.86232e+07	0.0289301	1.14885e+08	0.0330151	1.02041e+08	0.0411302
Csa_010461393.1	PREDICTED: 60S ribosomal protein L3-1 [Camelina sativa]	0	210	8	389	3.0205e+06	0.0383227	9.13995e+08	0.108423	3.14781e+08	0.0404108	6.76056e+08	0.0675123	6.92497e+08	0.0608789	6.17611e+08	0.0761552
Csa_010462617.1	PREDICTED: thionin [Camelina sativa]	0	112	3	138	1.06308e+06	0.03802	5.86504e+08	0.196119	2.06809e+08	0.0748393	1.02728e+09	0.289175	1.32998e+09	0.329583	7.58405e+08	0.263606
Csa_010466805.1	PREDICTED: chaperonin CPN60, mitochondrial [Camelina sativa]	0	81	13	577	4.41284e+06	0.0377459	2.65141e+08	0.0212046	1.03265e+08	0.00893752	2.20687e+08	0.0148576	3.28443e+08	0.0194662	2.55638e+08	0.0212512
Csa_010459474.1	PREDICTED: 60S ribosomal protein L6-1 [Camelina sativa]	0	141	10	234	1.76491e+06	0.037225	9.22868e+08	0.181992	4.99497e+08	0.1066	8.90801e+08	0.147882	1.09858e+09	0.160551	8.73874e+08	0.179129
Csa_010458591.1	PREDICTED: putative lactoylglutathione lyase isoform X1 [Camelina sativa]	0	44	9	322	2.42596e+06	0.0371839	1.43003e+08	0.0204936	1.13991e+08	0.0176789	1.39774e+08	0.0168624	1.44586e+08	0.0153557	8.57701e+07	0.0127766
Csa_010447980.1	PREDICTED: uncharacterized protein At4g28440-like [Camelina sativa]	0	18	3	154	1.15593e+06	0.0370457	1.26675e+07	0.00379575	7.82026e+06	0.00253594	2.02612e+07	0.00511086	2.51123e+07	0.00557653	1.46422e+07	0.00456056
Csa_010492309.1	PREDICTED: uncharacterized protein LOC104769728 [Camelina sativa]	0	132	4	181	1.35733e+06	0.0370111	1.44241e+08	0.0367738	1.78695e+08	0.049303	2.25025e+08	0.0482949	3.17615e+08	0.0600096	1.81029e+08	0.0479737
Csa_019092722.1	PREDICTED: sphingosine kinase 1-like isoform X1 [Camelina sativa]	0.019	9	0	265	1.98014e+06	0.0368787	123519272	0.0215088	149248400	0.0281256	175266912	0.0256924	184496176	0.0238089	87260664	0.0157945
Csa_010415348.1	PREDICTED: protein HHL1, chloroplastic isoform X1 [Camelina sativa]	0	21	5	231	1.72558e+06	0.0368681	4.37109e+07	0.00873184	3.02575e+07	0.00654122	51805826	0.00871197	4.29539e+07	0.00635899	3.86344e+07	0.00802225
Csa_010426394.1	PREDICTED: 40S ribosomal protein S11-1 [Camelina sativa]	0	121	6	160	1.18545e+06	0.036567	5.17339e+08	0.149205	2.52791e+08	0.0789004	5.93116e+08	0.144002	7.45902e+08	0.159426	5.95972e+08	0.178665
Csa_010498889.1	PREDICTED: spermidine synthase 1 [Camelina sativa]	0	77	4	400	2.9218e+06	0.0360509	7.81007e+07	0.00900997	4.71319e+07	0.00588429	8.03319e+07	0.0078015	7.87668e+07	0.00673412	3.07846e+07	0.00369154
Csa_010463885.1	PREDICTED: glyceraldehyde-3-phosphate dehydrogenase GAPC1, cytosolic [Camelina sativa]	0	792	32	338	2.45922e+06	0.0359093	2.57509e+09	0.351564	1.67174e+09	0.246996	3.52651e+09	0.405302	2.81614e+09	0.284928	1.984e+09	0.281552
Csa_010433367.1	PREDICTED: protochlorophyllide reductase B, chloroplastic isoform X1 [Camelina sativa]	0	61	3	401	2.91106e+06	0.0358289	9.1122e+07	0.0104859	6.05228e+07	0.00753726	9.71326e+07	0.00940958	2.03097e+08	0.0173203	1.18925e+08	0.0142254
Csa_010444638.1	PREDICTED: mitochondrial outer membrane protein porin 2 [Camelina sativa]	0	49	11	276	1.96955e+06	0.0352197	9.20269e+07	0.0153863	6.336e+07	0.0114642	9.18845e+07	0.0129325	1.21789e+08	0.0150903	8.07284e+07	0.0140298
Csa_010427548.1	PREDICTED: magnesium-protoporphyrin IX monomethyl ester [oxidative] cyclase, chloroplastic [Camelina sativa]	0	74	8	409	2.88417e+06	0.0348036	1.92562e+08	0.0217258	1.26852e+08	0.0154886	1.9009e+08	0.0180545	2.19216e+08	0.0183293	1.57077e+08	0.0184214
Csa_010463051.1	PREDICTED: UDP-arabinopyranose mutase 1 [Camelina sativa]	0	67	2	357	2515018	0.0347696	1.01957e+07	0.00131789	2312590	0.000323496	2.81393e+07	0.00306193	2.37794e+07	0.00227788	1.711e+07	0.00229887
Csa_010420918.1	PREDICTED: 20 kDa chaperonin, chloroplastic [Camelina sativa]	0	265	13	253	1.77538e+06	0.0346335	1.66731e+09	0.304106	1361006139	0.268645	1.77524e+09	0.272575	2.42023e+09	0.327141	1.60283e+09	0.303879
Csa_010495847.1	PREDICTED: lipoxygenase 2, chloroplastic-like [Camelina sativa]	0	150	17	897	6.29182e+06	0.0346187	5.34717e+08	0.027508	2.7431e+08	0.0152717	5.08353e+08	0.0220152	4.92239e+08	0.0187664	3.41639e+08	0.0182688
Csa_019082523.1	PREDICTED: 3-ketoacyl-CoA thiolase 2, peroxisomal-like [Camelina sativa]	0	20	0	468	3.27182e+06	0.0345041	5.08646e+07	0.00501531	4.64767e+07	0.00495938	74229001	0.00616137	70826864	0.00517548	5.39052e+07	0.00552483
Csa_010461687.1	PREDICTED: putative DNA-binding protein At1g48610 [Camelina sativa]	0	9	3	211	1.47013e+06	0.0343875	1.95857e+06	0.000428336	2.38406e+06	0.000564253	3.62099e+06	0.000666644	460071	7.4566e-05	359100	8.16333e-05
Csa_010464879.1	PREDICTED: 2-Cys peroxiredoxin BAS1, chloroplastic [Camelina sativa]	0	190	12	267	1.83168e+06	0.0338583	8.95807e+08	0.154822	1.17455e+09	0.219684	1.26611e+09	0.184209	1.05761e+09	0.135461	9.22511e+08	0.165727
Csa_010452888.2	PREDICTED: LOW QUALITY PROTEIN: uncharacterized protein LOC104734904 [Camelina sativa]	0	434	24	1126	7.71211e+06	0.0338035	1.66997e+09	0.068438	1.39795e+09	0.062	2.05894e+09	0.071032	1.86675e+09	0.0566953	1.43298e+09	0.0610429
Csa_010480123.1	PREDICTED: nucleolar protein 56-like [Camelina sativa]	0	13	2	528	3595431	0.0336081	4.31703e+07	0.00377293	1.95497e+07	0.00184903	45278070	0.00333122	58838233	0.00381087	3.84376e+07	0.00349185
Csa_010430349.1	PREDICTED: elongation factor G, chloroplastic isoform X1 [Camelina sativa]	0	219	42	783	5.09693e+06	0.0321272	6.76037e+08	0.0398416	6.76287e+08	0.0431328	7.98396e+08	0.0396102	8.50296e+08	0.037137	6.2e+08	0.0379808
Csa_010493425.1	PREDICTED: photosystem II stability/assembly factor HCF136, chloroplastic-like [Camelina sativa]	0	134	17	407	2.63537e+06	0.0319575	2.09141e+08	0.0237122	183075190	0.0224633	2.57657e+08	0.0245922	338493875	0.0284416	1.99909e+08	0.0235598
Csa_010420828.1	PREDICTED: GTP-binding nuclear protein Ran-1 [Camelina sativa]	0	91	12	221	1.42716e+06	0.0318717	5.36191e+08	0.111958	2.92078e+08	0.0660001	5.76717e+08	0.101373	6.93159e+08	0.10726	5.1649e+08	0.112099
Csa_010466592.1	PREDICTED: plastidial pyruvate kinase 1, chloroplastic [Camelina sativa]	0	38	8	599	3835973	0.0316064	48700690	0.00375177	3.10521e+07	0.00258882	6.20308e+07	0.00402282	8.4131e+07	0.00480316	6.61331e+07	0.00529573
Csa_010425278.1	PREDICTED: probable plastid-lipid-associated protein 4, chloroplastic [Camelina sativa]	0	17	1	242	1.54877e+06	0.0315862	2.41436e+07	0.00460379	3.64391e+07	0.00751953	1.76351e+07	0.00283082	3.51446e+07	0.00496639	2.12754e+07	0.00421692
Csa_010450334.1	PREDICTED: nucleolar protein 56-like [Camelina sativa]	0	4	0	138	875689	0.0313183	8659286	0.00289555	2696904	0.000975944	6799482	0.00191402	15993296	0.0039633	11071176	0.00384812
Csa_010433406.1	PREDICTED: 60S ribosomal protein L14-2-like [Camelina sativa]	0	99	8	134	843787	0.0310781	5.48799e+08	0.188989	2.7696e+08	0.103217	6.09138e+08	0.176588	6.41744e+08	0.163778	5.60369e+08	0.200587
Csa_010504652.1	PREDICTED: probable glucan endo-1,3-beta-glucosidase BG3 [Camelina sativa]	0	137	5	341	2.11563e+06	0.0306205	149805415	0.0202722	2.00328e+08	0.0293376	1.80932e+08	0.0206116	3.25682e+08	0.0326616	1.42305e+08	0.0200171
Csa_019084309.1	PREDICTED: LOW QUALITY PROTEIN: putative F-box protein At4g10190 [Camelina sativa]	0.028	49	1	374	2.30814e+06	0.0304591	1.19885e+08	0.0147918	2.69923e+08	0.0360419	237604368	0.0246793	236474304	0.0216227	1.35284e+08	0.0173504
Csa_010422128.1	PREDICTED: plant UBX domain-containing protein 8 [Camelina sativa]	0.001	5	2	559	3406826	0.0300791	4.82994e+07	0.00398711	3.88765e+07	0.00347307	5.53586e+07	0.00384701	3.87071e+07	0.00236798	3.94668e+07	0.00338652
Csa_010466477.1	PREDICTED: proteasome subunit alpha type-4-A [Camelina sativa]	0	23	7	250	1.49732e+06	0.0295598	7.35801e+07	0.0135815	5.52939e+07	0.0110452	7.896e+07	0.0122692	9.66798e+07	0.0132249	5.43109e+07	0.0104203
Csa_010435466.1	PREDICTED: peroxiredoxin-2F, mitochondrial-like [Camelina sativa]	0	21	7	201	1.19555e+06	0.0293561	4.10316e+07	0.00942	20067342	0.00498577	2.83991e+07	0.00548855	4.0942e+07	0.0069658	2.85494e+07	0.00681295
Csa_010458669.1	PREDICTED: ATP-dependent Clp protease proteolytic subunit-related protein 2, chloroplastic [Camelina sativa]	0	28	5	279	1.64821e+06	0.0291564	7.45473e+07	0.0123298	8.09481e+07	0.0144891	1.09783e+08	0.0152856	1.01788e+08	0.0124765	9.56249e+07	0.01644
Csa_010422149.1	PREDICTED: PGR5-like protein 1B, chloroplastic [Camelina sativa]	0	5	3	319	1.87593e+06	0.0290237	6151172	0.000889806	8881646	0.0013904	8.75494e+06	0.00106614	20473518	0.00219482	1.21087e+07	0.0018207
Csa_010417905.1	PREDICTED: 60S ribosomal protein L10a-2 [Camelina sativa]	0	55	1	216	1.23785e+06	0.0282841	58097812	0.0124118	57693124	0.0133386	83249128	0.0149719	56313858	0.00891579	48762716	0.0108285
Csa_010443579.1	PREDICTED: 40S ribosomal protein S4-3-like [Camelina sativa]	0	241	16	262	1.48767e+06	0.0280242	5.42496e+08	0.0955485	3.56067e+08	0.0678687	5.77499e+08	0.0856248	5.62856e+08	0.0734673	3.78071e+08	0.069216
Csa_010430043.1	PREDICTED: heat shock 70 kDa protein 15 [Camelina sativa]	0	75	5	829	4.65296e+06	0.0277014	2.02748e+08	0.0112858	1.68742e+08	0.010165	2.28148e+08	0.0106908	2.79421e+08	0.0115267	2.19576e+08	0.0127047
Csa_010463338.1	PREDICTED: alanine--tRNA ligase-like [Camelina sativa]	0	61	5	1050	5797811	0.0272522	8.54937e+07	0.00375727	6.19669e+07	0.0029472	1.10104e+08	0.00407347	118339521	0.00385424	1.02941e+08	0.00470254
Csa_010438732.1	PREDICTED: heat shock protein 90-2-like [Camelina sativa]	0	409	16	706	3.85144e+06	0.0269243	1.06147e+09	0.0693795	6.19504e+08	0.0438205	1.32539e+09	0.072927	1.1093e+09	0.0537333	6.97115e+08	0.0473624
Csa_010466126.1	PREDICTED: tubulin alpha-2 chain-like [Camelina sativa]	0	344	6	451	2.45047e+06	0.0268164	8.83922e+08	0.090441	6.07185e+08	0.0672331	1.28997e+09	0.11111	1.16884e+09	0.0886289	9.92718e+08	0.10558
Csa_010506279.1	PREDICTED: cysteine synthase, chloroplastic/chromoplastic [Camelina sativa]	0	136	12	395	2.14433e+06	0.026793	2.25384e+08	0.0263302	2.13501e+08	0.0269924	2.65281e+08	0.0260891	2.27051e+08	0.0196573	1.63875e+08	0.0198998
Csa_010416237.1	PREDICTED: enolase 1, chloroplastic [Camelina sativa]	0	46	3	479	2.59448e+06	0.0267326	4.24381e+07	0.00408835	1.63667e+06	0.000170633	9.50857e+06	0.000771133	100980411	0.00720941	7.52506e+07	0.00753544
Csa_010459106.1	PREDICTED: pyrophosphate-energized vacuolar membrane proton pump 1 [Camelina sativa]	0	155	6	766	4.11894e+06	0.0265389	4.74883e+08	0.0286079	4.18686e+08	0.027296	517654947	0.0262519	5.93405e+08	0.0264923	5.05306e+08	0.0316417
Csa_010475419.1	PREDICTED: histone H1.1-like [Camelina sativa]	0	11	0	271	1.44697e+06	0.0263523	1.43033e+07	0.00243553	4.44946e+06	0.000819929	1.87866e+07	0.00269295	1.29382e+07	0.00163268	1.36839e+07	0.00242201
Csa_010486562.1	PREDICTED: histone H1.1-like [Camelina sativa]	0	11	0	273	1.44697e+06	0.0261592	1.43033e+07	0.00241769	4.44946e+06	0.000813923	1.87866e+07	0.00267323	1.29382e+07	0.00162072	1.36839e+07	0.00240426
Csa_010426520.1	PREDICTED: 60S ribosomal protein L26-1 [Camelina sativa]	0	130	11	146	770902	0.0260599	4.73685e+08	0.149715	2.28964e+08	0.0783164	3.82262e+08	0.101709	5.83099e+08	0.13658	3.80863e+08	0.125127
Csa_010503467.1	PREDICTED: haloacid dehalogenase-like hydrolase domain-containing protein At3g48420 [Camelina sativa]	0	69	10	327	1.71026e+06	0.0258131	1.41071e+08	0.0199076	101585705	0.015514	1.49169e+08	0.0177207	161383597	0.0168776	1.26254e+08	0.0185196
Csa_010424235.1	PREDICTED: histone H2B.10-like [Camelina sativa]	0	10	0	152	790254	0.0256596	18928443	0.00574645	5.94848e+06	0.00195434	31529737	0.00805799	33140519	0.00745614	27624674	0.00871741
Csa_010465732.1	PREDICTED: universal stress protein PHOS32 [Camelina sativa]	0	34	5	163	833317	0.0252319	1.70036e+08	0.0481371	177184288	0.0542845	2.48302e+08	0.0591757	1.76281e+08	0.0369842	1.20625e+08	0.0354963
Csa_010442239.1	PREDICTED: acetyl-CoA acetyltransferase, cytosolic 1 [Camelina sativa]	0	11	5	403	2.02659e+06	0.0248192	27936860	0.0031989	1.61608e+07	0.0020026	25423769	0.00245067	3.76593e+07	0.00319569	2.23112e+07	0.00265553
Csa_010465687.1	PREDICTED: translationally-controlled tumor protein 1 [Camelina sativa]	0	176	7	168	841599	0.0247242	176709747	0.0485377	2.42139e+08	0.0719771	268499327	0.0620846	3.09148e+08	0.0629297	1.99377e+08	0.0569247
Csa_010495636.1	PREDICTED: malate dehydrogenase, cytoplasmic 2-like [Camelina sativa]	0	110	13	394	1.95812e+06	0.0245284	8.30118e+08	0.0972236	5.81252e+08	0.0736727	9.94661e+08	0.0980683	1.21771e+09	0.105693	8.31303e+08	0.101204
Csa_010465189.1	PREDICTED: LOW QUALITY PROTEIN: chaperonin 60 subunit beta 2, chloroplastic [Camelina sativa]	0	1013	5	596	2.94953e+06	0.0244249	3.15516e+07	0.00244289	1.65918e+07	0.00139022	3.52854e+07	0.00229985	5.61351e+07	0.00322097	4.35018e+07	0.00350103
Csa_010497600.1	PREDICTED: peptidyl-prolyl cis-trans isomerase CYP38, chloroplastic-like [Camelina sativa]	0	18	0	87	429256	0.0243514	3.00964e+07	0.0159633	6.09347e+07	0.0349771	6.61747e+07	0.0295476	4.94967e+07	0.0194561	2.6789e+07	0.0147697
Csa_010460118.1	PREDICTED: glutamate--glyoxylate aminotransferase 1 [Camelina sativa]	0	304	8	481	2.34462e+06	0.0240577	1.01637e+09	0.0975063	1.17164e+09	0.121643	1.4077e+09	0.113688	1.33065e+09	0.0946053	1.03855e+09	0.103566
Csa_010472973.1	PREDICTED: chaperone protein ClpC1, chloroplastic-like [Camelina sativa]	0	142	0	445	2.13847e+06	0.0237175	3.20651e+08	0.0332507	2.29491e+08	0.0257539	2.90143e+08	0.0253281	4.43858e+08	0.03411	2.76753e+08	0.0298309
Csa_010490757.1	PREDICTED: 60S ribosomal protein L4-2 [Camelina sativa]	0	383	24	407	1.95453e+06	0.0237015	8.97761e+08	0.101788	3.97607e+08	0.0487863	7.32995e+08	0.0699611	9.27066e+08	0.0778958	6.79798e+08	0.0801161
Csa_010476972.1	PREDICTED: receptor for activated C kinase 1A [Camelina sativa]	0	129	3	328	1.55221e+06	0.0233563	4.67069e+08	0.0657106	2.70154e+08	0.0411316	5.1687e+08	0.061215	4.47174e+08	0.0466231	3.81827e+08	0.0558376
Csa_010416330.1	PREDICTED: uncharacterized protein LOC104702202 [Camelina sativa]	0	1	1	199	924555	0.0229301		0		0		0		0		0
Csa_010458997.1	PREDICTED: uncharacterized protein LOC104740167 [Camelina sativa]	0	57	9	376	1.73964e+06	0.0228349	1.47543e+08	0.0181075	1.85338e+08	0.0246158	3.90811e+08	0.0403765	2.2605e+08	0.0205596	2.86761e+08	0.0365819
Csa_010438498.1	PREDICTED: ADP,ATP carrier protein 1, mitochondrial-like [Camelina sativa]	0	58	0	129	592152	0.0226553	135693505	0.0485397	9.22022e+07	0.0356936	1.74368e+08	0.052508	1.21875e+08	0.032309	7.7328e+07	0.0287528
Csa_010417919.1	PREDICTED: 60S acidic ribosomal protein P2-1 [Camelina sativa]	0	25	4	114	519756	0.022502	6.54411e+07	0.0264895	2.13375e+07	0.00934711	6.14406e+07	0.0209363	65441380	0.0196311	4.14104e+07	0.0174236
Csa_010414719.1	PREDICTED: thionin [Camelina sativa]	0	116	1	133	605959	0.0224863	4.0576e+08	0.140782	2.46603e+08	0.0925946	6.70391e+08	0.195806	7.74049e+08	0.199028	584370722	0.210752
Csa_010438931.1	PREDICTED: magnesium protoporphyrin IX methyltransferase, chloroplastic [Camelina sativa]	0	84	13	313	1.41436e+06	0.0223019	1.77005e+08	0.0260957	1.20003e+08	0.0191464	1.70278e+08	0.0211331	2.53727e+08	0.0277217	1.81919e+08	0.0278784
Csa_010508848.1	PREDICTED: 40S ribosomal protein S26-1 [Camelina sativa]	0	70	3	131	590189	0.0222355	4.12021e+08	0.145136	2.41459e+08	0.0920472	4.67282e+08	0.138566	4.83797e+08	0.126296	4.07256e+08	0.149118
Csa_010432013.1	PREDICTED: serine hydroxymethyltransferase 1, mitochondrial [Camelina sativa]	0	325	14	517	2.32689e+06	0.0222132	1.18386e+09	0.105667	6.86402e+08	0.066302	1.19939e+09	0.0901198	1.15814e+09	0.0766073	9.39875e+08	0.0871994
Csa_010505538.1	PREDICTED: probable histone H2A variant 2 [Camelina sativa]	0	50	0	135	600813	0.0219651	6126931	0.00209429		0		0	5.058e+06	0.00128128	7572309	0.00269047
Csa_010465530.1	PREDICTED: probable histone H2A variant 3 [Camelina sativa]	0	47	0	136	600813	0.0218036	6126931	0.00207889		0		0	5.058e+06	0.00127186	7572309	0.00267069
Csa_010435552.1	PREDICTED: chaperonin CPN60, mitochondrial-like [Camelina sativa]	0	45	0	113	496124	0.021669	1.42176e+08	0.0580598	4.82262e+07	0.0213129	78027266	0.0268236	9.17529e+07	0.0277677	5.6791e+07	0.0241065
Csa_010427164.1	PREDICTED: histone H2A variant 1-like [Camelina sativa]	0	50	0	137	600813	0.0216444	6126931	0.00206372		0		0	5.058e+06	0.00126257	7572309	0.00265119
Csa_010465788.1	PREDICTED: S-adenosylmethionine synthase 4 [Camelina sativa]	0	381	12	393	1.71856e+06	0.0215824	1.13772e+09	0.133589	6.69492e+08	0.0850729	1.1412e+09	0.112803	1.18527e+09	0.103139	9.10144e+08	0.111084
Csa_010422569.1	PREDICTED: V-type proton ATPase subunit F [Camelina sativa]	0	11	4	128	557100	0.0214808	4.02631e+07	0.0145153	13895131	0.00542115	4.5115e+07	0.0136918	4.40528e+07	0.0117696	3.36115e+07	0.0125954
Csa_010432926.1	PREDICTED: leucine aminopeptidase 2, chloroplastic [Camelina sativa]	0	113	9	584	2.50268e+06	0.0211504	2.72392e+08	0.0215234	2.31249e+08	0.0197745	2.92424e+08	0.0194514	2.47707e+08	0.0145052	1.94976e+08	0.0160141
Csa_010418195.1	PREDICTED: 5'-adenylylsulfate reductase 2, chloroplastic [Camelina sativa]	0	25	10	455	1.93608e+06	0.0210009	3.72382e+07	0.00377664	3.81616e+07	0.00418845	6.0501e+07	0.00516537	4.98636e+07	0.00374775	4.23079e+07	0.00446009
Csa_010425277.1	PREDICTED: probable plastid-lipid-associated protein 4, chloroplastic isoform X2 [Camelina sativa]	0	7	0	241	1.01455e+06	0.020777	13632924	0.00261036	2.33715e+07	0.00484294		0	1.29089e+07	0.00183177	9.49925e+06	0.00189063
Csa_010469032.1	PREDICTED: uncharacterized protein LOC104749149 [Camelina sativa]	0	8	2	272	1.1368e+06	0.0206273	1.33797e+06	0.000226989	17585290	0.00322864	1.35506e+06	0.000193526	5616403	0.000706135	2.66695e+06	0.000470306
Csa_019102181.1	PREDICTED: probable plastid-lipid-associated protein 4, chloroplastic [Camelina sativa]	0	7	0	244	1.01455e+06	0.0205215	13632924	0.00257826	2.33715e+07	0.00478339		0	1.29089e+07	0.00180925	9.49925e+06	0.00186738
Csa_010415780.1	PREDICTED: MLP-like protein 31 [Camelina sativa]	0	61	5	172	714781	0.0205103	9.36549e+07	0.0251264	1.41702e+08	0.0411422	1.412e+08	0.0318902	1.15985e+08	0.0230607	9.88044e+07	0.0275538
Csa_010436160.1	PREDICTED: mediator of RNA polymerase II transcription subunit 37f isoform X1 [Camelina sativa]	0	399	31	668	2.77481e+06	0.0205014	5.17998e+08	0.0357832	3.25508e+08	0.0243346	5.88055e+08	0.0341972	5.96955e+08	0.0305607	3.87794e+08	0.0278457
Csa_010428897.1	PREDICTED: 60S ribosomal protein L22-2-like isoform X1 [Camelina sativa]	0	112	3	162	671587	0.0204604	270013330	0.0769127	174727612	0.0538623	2.82623e+08	0.0677707	4.9278e+08	0.104025	2.51913e+08	0.0745882
Csa_010434166.1	PREDICTED: sphingosine kinase 2-like isoform X1 [Camelina sativa]	0.019	9	0	480	1.98014e+06	0.0203601	123519272	0.0118747	149248400	0.0155277	175266912	0.0141843	184496176	0.0131445	87260664	0.00871989
Csa_010413185.1	PREDICTED: ribosome-recycling factor, chloroplastic-like [Camelina sativa]	0	75	6	275	1.12113e+06	0.0201211	1.81623e+08	0.0304767	1.7402e+08	0.0316013	2.57955e+08	0.0364386	2.28159e+08	0.0283728	1.40168e+08	0.0244484
Csa_010412572.1	PREDICTED: uncharacterized protein LOC104698886 [Camelina sativa]	0	6	1	128	521252	0.0200985	26443850	0.00953329	30824030	0.0120259	26752686	0.00811909	11992592	0.00320406	6510421	0.00243968
Csa_010459715.1	PREDICTED: plastocyanin major isoform, chloroplastic [Camelina sativa]	0	95	3	167	679918	0.020094	1.08236e+09	0.299078	1383515551	0.413719	1.33636e+09	0.310855	1.04206e+09	0.213391	9.85903e+08	0.283173
Csa_010460229.1	PREDICTED: LOW QUALITY PROTEIN: adenylate kinase 4 [Camelina sativa]	0	24	0	246	984225	0.0197463	2.98499e+07	0.00559932	1.60384e+07	0.00325584	2.78621e+07	0.00439976	2.97111e+07	0.0041303	1.98574e+07	0.00387188
Csa_010415776.1	PREDICTED: MLP-like protein 31 [Camelina sativa]	0	18	0	171	681829	0.0196791	6.22758e+07	0.0168055	2.38686e+07	0.0069706	5.46993e+07	0.0124261	65932748	0.0131857	5.30408e+07	0.0148781
Csa_010444224.1	PREDICTED: adenylate kinase 4 [Camelina sativa]	0	24	0	247	984225	0.0196664	2.98499e+07	0.00557665	1.60384e+07	0.00324266	2.78621e+07	0.00438194	2.97111e+07	0.00411358	1.98574e+07	0.00385621
Csa_010491496.1	PREDICTED: uncharacterized protein At4g28440 isoform X1 [Camelina sativa]	0	12	3	149	589854	0.0195382	1.62767e+07	0.00504091	3.95956e+07	0.0132709	30500817	0.00795198	4.02232e+07	0.00923184	3.03903e+07	0.00978325
Csa_010425732.1	PREDICTED: eukaryotic translation initiation factor 3 subunit I [Camelina sativa]	0	20	3	356	1.39535e+06	0.0193446	1.10593e+09	0.143352	4.38294e+08	0.0614829	1.15879e+09	0.126446	1.82558e+09	0.175368	1507445962	0.203107
Csa_010435310.1	PREDICTED: 60S ribosomal protein L13a-3 [Camelina sativa]	0	174	0	206	807076	0.0193363	1.80442e+08	0.0404201	8.95914e+07	0.0217189	2.03541e+08	0.0383826	2.16329e+08	0.0359125	1.17359e+08	0.0273264
Csa_010419241.1	PREDICTED: UDP-sulfoquinovose synthase, chloroplastic-like [Camelina sativa]	0	5	0	192	750616	0.0192949		0		0	1.15261e+06	0.000233201		0	740487	0.000184991
Csa_010482382.1	PREDICTED: thioredoxin M1, chloroplastic [Camelina sativa]	0	151	8	184	698155	0.0187267	9.30082e+08	0.233255	9.79555e+08	0.265858	1.30427e+09	0.275359	1.17821e+09	0.218979	8.65877e+08	0.225721
Csa_010468841.1	PREDICTED: 50S ribosomal protein L1, chloroplastic-like [Camelina sativa]	0	115	13	350	1.32319e+06	0.0186587	3.85641e+08	0.0508444	2.76732e+08	0.0394848	5.01831e+08	0.0556979	3.88976e+08	0.0380061	3.30359e+08	0.0452743
Csa_019084795.1	PREDICTED: probable plastid-lipid-associated protein 4, chloroplastic isoform X1 [Camelina sativa]	0	7	0	269	1.01455e+06	0.0186143	13632924	0.00233865	2.33715e+07	0.00433884		0	1.29089e+07	0.0016411	9.49925e+06	0.00169383
Csa_010487816.1	PREDICTED: protein TIC 62, chloroplastic-like [Camelina sativa]	0	48	4	773	2.89204e+06	0.0184651	1.02357e+08	0.00611037	6.76516e+07	0.00437056	1.02544e+08	0.00515323	136413471	0.00603498	1.10773e+08	0.00687365
Csa_010458594.1	PREDICTED: aminomethyltransferase, mitochondrial [Camelina sativa]	0	358	25	408	1.52161e+06	0.0184065	1.28274e+09	0.14508	1.21274e+09	0.148438	1.62132e+09	0.154368	1.49532e+09	0.125335	1.3186e+09	0.15502
Csa_010505041.1	PREDICTED: glycine cleavage system H protein 1, mitochondrial [Camelina sativa]	0	138	3	166	616626	0.0183333	6.71297e+08	0.18661	8.52441e+08	0.256445	9.05636e+08	0.211932	7.41267e+08	0.152709	5.17106e+08	0.149419
Csa_010426934.1	PREDICTED: 60S ribosomal protein L24-2 [Camelina sativa]	0	18	2	163	603447	0.0182717	1.42446e+07	0.00403265	2155157	0.000660282		0	995219	0.000208799	650989	0.000191567
Csa_010476452.1	PREDICTED: photosynthetic NDH subunit of lumenal location 2, chloroplastic-like [Camelina sativa]	0	6	2	193	711187	0.0181867	816367	0.000195189	2.25507e+06	0.000583501	2.43751e+06	0.000490612	511635	9.0657e-05	1.48279e+06	0.000368515
Csa_010443053.1	PREDICTED: thiamine thiazole synthase, chloroplastic [Camelina sativa]	0	248	11	351	1.28761e+06	0.0181052	7.66855e+08	0.100817	7.12081e+08	0.101312	7.65255e+08	0.0846933	9.33371e+08	0.0909379	6.78259e+08	0.0926877
Csa_010439778.1	PREDICTED: sm-like protein LSM5 [Camelina sativa]	0.016	1	1	88	322193	0.0180701		0		0		0		0		0
Csa_010505209.1	PREDICTED: 60S ribosomal protein L24-1 [Camelina sativa]	0	38	2	164	588402	0.0177075	1.25446e+08	0.0352974	5.85475e+07	0.017828	141811302	0.0335905	9.31797e+07	0.0194301	8.40379e+07	0.024579
Csa_010508411.1	PREDICTED: defensin-like protein 4 [Camelina sativa]	0	86	2	98	348028	0.0175273	8.36149e+07	0.0393719	2.29489e+08	0.116943	1.9461e+08	0.0771415	1.72657e+08	0.06025	6.06436e+07	0.029682
Csa_010432401.1	PREDICTED: 40S ribosomal protein S25-3-like [Camelina sativa]	0	61	1	108	380939	0.0174084	18509038	0.00790839	2.10419e+07	0.0097297	17696282	0.00636514	30058822	0.00951801	16348270	0.00726076
Csa_010433486.1	PREDICTED: fructose-bisphosphate aldolase 5, cytosolic isoform X1 [Camelina sativa]	0	176	10	358	1.25998e+06	0.0173703	2.08883e+08	0.0269245	2.29871e+08	0.0320656	2.25625e+08	0.0244824	4.69059e+08	0.0448066	3.64354e+08	0.0488174
Csa_010505352.1	PREDICTED: 60S ribosomal protein L36-2-like [Camelina sativa]	0	28	2	112	393556	0.0173426	6.83258e+07	0.028151	1.93151e+07	0.00861225	5.88566e+07	0.0204139	7.30534e+07	0.0223059	4.90765e+07	0.0210179
Csa_010427581.1	PREDICTED: H/ACA ribonucleoprotein complex subunit 4-like [Camelina sativa]	0	8	4	573	2.00277e+06	0.0172505	14763318	0.00118893	1.71165e+06	0.000149176	18393119	0.00124695	23090653	0.0013781	1.84294e+07	0.00154274
Csa_010423884.1	PREDICTED: uncharacterized protein At5g02240-like [Camelina sativa]	0	55	8	253	880134	0.0171694	1.47765e+08	0.0269513	1.45251e+08	0.0286706	3.40416e+08	0.0522685	1.60727e+08	0.0217254	2.15904e+08	0.040933
Csa_010419205.1	PREDICTED: 40S ribosomal protein S3a-1-like [Camelina sativa]	0	183	16	262	898428	0.0169242	6.14508e+08	0.108232	2.69454e+08	0.0513595	4.33452e+08	0.0642672	6.34709e+08	0.082846	4.10187e+08	0.0750956
Csa_010473638.1	PREDICTED: monodehydroascorbate reductase 5, mitochondrial [Camelina sativa]	0	199	22	496	1.68093e+06	0.0167261	5.97264e+08	0.0555665	4.53538e+08	0.0456636	7.41144e+08	0.0580458	7.68004e+08	0.0529517	5.98563e+08	0.0578844
Csa_010421197.1	PREDICTED: 60S ribosomal protein L13-3 [Camelina sativa]	0	24	1	206	696712	0.0166922	25116454	0.00562625	17259498	0.00418407	32529182	0.00613417	40001776	0.00664064	35135404	0.0081811
Csa_010458632.1	PREDICTED: 14 kDa proline-rich protein DC2.15-like [Camelina sativa]	0	24	2	143	476707	0.0164529	98576448	0.0318101	1.21465e+08	0.0424184	1.31839e+08	0.0358145	1.72667e+08	0.0412926	1.13376e+08	0.0380295
Csa_010476270.1	PREDICTED: glyceraldehyde-3-phosphate dehydrogenase A, chloroplastic isoform X2 [Camelina sativa]	0	678	1	317	1.04047e+06	0.0161994	4271707	0.000621828	1108586	0.000174642		0		0	2.32654e+06	0.000352035
Csa_010511054.1	PREDICTED: thionin-like [Camelina sativa]	0	40	1	133	435795	0.0161718	1.17633e+08	0.0408138	8.1771e+07	0.0307034	2.45168e+08	0.0716081	2.87633e+08	0.073958	2.37444e+08	0.0856335
Csa_010518069.1	PREDICTED: uncharacterized protein LOC104793414 [Camelina sativa]	0	63	7	139	452218	0.0160568	3.58668e+08	0.119071	322523318	0.115874	3.8781e+08	0.108381	4.34357e+08	0.106864	2.80624e+08	0.0968376
Csa_010420237.1	PREDICTED: UDP-arabinopyranose mutase 2 [Camelina sativa]	0	68	3	363	1.17985e+06	0.0160416	2.65193e+08	0.033712	1.46779e+08	0.0201927	2.64724e+08	0.0283293	4.82927e+08	0.0454959	379259942	0.0501146
Csa_010433791.1	PREDICTED: heat shock 70 kDa protein 6, chloroplastic-like [Camelina sativa]	0	547	25	719	2.32985e+06	0.0159929	1.6672e+09	0.107001	1.51296e+09	0.105084	2.20034e+09	0.11888	2.61322e+09	0.124293	1.90014e+09	0.126762
Csa_010435508.1	PREDICTED: phosphoglycolate phosphatase 1B, chloroplastic [Camelina sativa]	0	125	10	365	1.16717e+06	0.0157822	4.06841e+08	0.0514352	3.66266e+08	0.0501121	5.3352e+08	0.0567816	5.82954e+08	0.0546185	4.3695e+08	0.0574212
Csa_010417621.1	PREDICTED: phosphoglycerate kinase, cytosolic [Camelina sativa]	0	391	15	401	1.27873e+06	0.0157385	4.13632e+08	0.0475991	124501419	0.0155049	354135396	0.0343064	3.34477e+08	0.0285247	3.17448e+08	0.0379718
Csa_010466290.1	PREDICTED: DNA-damage-repair/toleration protein DRT100-like [Camelina sativa]	0	40	8	365	1.16356e+06	0.0157335	1.98433e+08	0.025087	1.00542e+08	0.0137561	2.31198e+08	0.024606	2.49919e+08	0.0234155	2.03096e+08	0.0266897
Csa_010423648.1	PREDICTED: signal recognition particle 54 kDa protein, chloroplastic [Camelina sativa]	0	60	15	568	1.80749e+06	0.0157056	100414909	0.00815789	3.49872e+07	0.00307609	8.46909e+07	0.00579213	9.07301e+07	0.00546262	7.82595e+07	0.0066088
Csa_019089770.1	PREDICTED: golgin subfamily A member 6-like protein 22 isoform X2 [Camelina sativa]	0	2	0	278	878423	0.015595	14169574	0.00235202		0	22551196	0.00315119	17184244	0.0021139	11450594	0.00197568
Csa_010442915.1	PREDICTED: thylakoid lumenal 17.4 kDa protein, chloroplastic [Camelina sativa]	0	69	9	238	749901	0.0155508	1.64381e+08	0.0318714	1.46527e+08	0.0307454	215644386	0.0351974	217250671	0.0312164	2.17957e+08	0.0439267
Csa_019086050.1	PREDICTED: golgin subfamily A member 6-like protein 22 isoform X2 [Camelina sativa]	0	2	0	279	878423	0.0155391	14169574	0.00234358		0	22551196	0.0031399	17184244	0.00210632	11450594	0.0019686
Csa_010437036.1	PREDICTED: protein RER1A [Camelina sativa]	0	1	0	195	606953	0.015362	14347527	0.00339524	2.82107e+07	0.00722467	16858952	0.0033585		0	686294	0.000168814
Csa_010416918.1	PREDICTED: protein RER1B [Camelina sativa]	0	1	0	195	606953	0.015362	14347527	0.00339524	2.82107e+07	0.00722467	16858952	0.0033585		0	686294	0.000168814
Csa_010414292.1	PREDICTED: uncharacterized protein LOC104700469 [Camelina sativa]	0	32	10	394	1.2215e+06	0.0153012	1.52139e+09	0.178186	1.23327e+09	0.156315	8.09495e+08	0.079812	5.8789e+08	0.0510267	5.56808e+08	0.0677865
Csa_010447022.1	PREDICTED: peptidyl-prolyl cis-trans isomerase [Camelina sativa]	0	79	3	171	529752	0.0152899	116475351	0.0314316	6.46121e+07	0.0188693	1.42786e+08	0.0324368	144170108	0.0288322	1.14949e+08	0.0322435
Csa_010437471.1	PREDICTED: ankyrin repeat domain-containing protein 2A-like [Camelina sativa]	0	60	8	344	1.05773e+06	0.0151755	1.41278e+08	0.0189515	1.19345e+08	0.0173255	1.60016e+08	0.0180699	2.10487e+08	0.020925	1.42038e+08	0.0198052
Csa_010416508.1	PREDICTED: TATA-binding protein-associated factor 2N-like [Camelina sativa]	0	10	2	332	1.01827e+06	0.0151375	3.5202e+07	0.00489279	23149188	0.00348206	2.95975e+07	0.00346312	4.6061e+07	0.00474453	2.9742e+07	0.00429701
Csa_010449401.1	PREDICTED: protein PAM68, chloroplastic-like [Camelina sativa]	0.017	4	1	218	667114	0.0151032	4368579	0.000924723	2.33924e+06	0.000535867	5973092	0.00106437	8.60147e+06	0.00134932	4265594	0.000938549
Csa_010438971.2	PREDICTED: 31 kDa ribonucleoprotein, chloroplastic-like, partial [Camelina sativa]	0	97	0	156	476887	0.0150875	6.0224e+08	0.178145	4.0888e+08	0.130891	5.69382e+08	0.141785	5.96422e+08	0.130746	4.99467e+08	0.153573
Csa_010413019.1	PREDICTED: phosphoenolpyruvate carboxylase 2-like [Camelina sativa]	0	310	0	894	2.6827e+06	0.0148102	7.84603e+08	0.0404987	8.55086e+08	0.0477651	1.03682e+09	0.0450522	9.6563e+08	0.0369378	8.07725e+08	0.0433371
Csa_010417176.1	PREDICTED: NADP-dependent glyceraldehyde-3-phosphate dehydrogenase [Camelina sativa]	0	118	18	496	1.48705e+06	0.0147969	2.59988e+08	0.024188	2.51564e+08	0.0253283	3.54101e+08	0.0277329	3.82336e+08	0.026361	2.56468e+08	0.024802
Csa_010415598.1	PREDICTED: methyltransferase-like protein 7B [Camelina sativa]	0	69	7	305	908024	0.0146935	8.39833e+07	0.0127064	7.01311e+07	0.0114828	1.23308e+08	0.0157052	1.1134e+08	0.0124839	8.35961e+07	0.0131468
Csa_010438354.1	PREDICTED: uncharacterized protein LOC104721969 [Camelina sativa]	0	303	0	957	2.81745e+06	0.0145302	8.74847e+08	0.042184	7.68526e+08	0.0401037	8.21893e+08	0.0333621	9.37456e+08	0.0334994	7.47102e+08	0.0374457
Csa_010417785.1	PREDICTED: 30S ribosomal protein S17, chloroplastic-like [Camelina sativa]	0	84	2	112	329291	0.0145107		0		0	687780	0.000238551	595300	0.000181768	1.13194e+06	0.000484773
Csa_010444504.1	PREDICTED: 50S ribosomal protein L29, chloroplastic-like [Camelina sativa]	0	65	8	174	504371	0.0143063	1.81077e+08	0.0480222	9.64994e+07	0.0276958	1.15648e+08	0.025819	1.72236e+08	0.0338512	1.23284e+08	0.0339854
Csa_010423537.1	PREDICTED: 40S ribosomal protein S17-4-like [Camelina sativa]	0	83	0	138	399666	0.0142937	3.0894e+08	0.103305	1.95265e+08	0.0706615	3.13541e+08	0.0882602	2.92029e+08	0.0723676	2.02553e+08	0.0704033
Csa_010506494.1	PREDICTED: fasciclin-like arabinogalactan protein 8 [Camelina sativa]	0	35	6	423	1.21957e+06	0.0142297	1.99761e+08	0.0217921	49914859	0.00589288	6.90298e+07	0.00633937	50667396	0.00409625	71810727	0.00814297
Csa_010433141.1	PREDICTED: uncharacterized protein LOC104717292 isoform X1 [Camelina sativa]	0	303	0	980	2.81745e+06	0.0141892	8.74847e+08	0.041194	7.68526e+08	0.0391625	8.21893e+08	0.0325791	9.37456e+08	0.0327132	7.47102e+08	0.0365669
Csa_010422057.1	PREDICTED: V-type proton ATPase subunit E1 [Camelina sativa]	0	71	10	230	660758	0.0141789	3.87393e+08	0.0777235	3.79886e+08	0.0824829	4.83386e+08	0.0816425	5.99615e+08	0.0891544	4.53555e+08	0.0945879
Csa_010415765.1	PREDICTED: NAD(P)H-quinone oxidoreductase subunit L, chloroplastic [Camelina sativa]	0.033	2	1	192	548888	0.0141094	884235	0.000212517	3.11357e+06	0.000809835	1403932	0.00028405	3.1121e+06	0.000554307	1.88661e+06	0.000471319
Csa_010423371.1	PREDICTED: 40S ribosomal protein S17-4-like [Camelina sativa]	0	86	1	140	399666	0.0140895	3.23673e+08	0.106686	2.01189e+08	0.0717652	3.20515e+08	0.0889344	2.98793e+08	0.0729861	2.08112e+08	0.071302
Csa_010464738.1	PREDICTED: 40S ribosomal protein S17-2-like [Camelina sativa]	0	83	0	140	399666	0.0140895	3.0894e+08	0.10183	1.95265e+08	0.0696521	3.13541e+08	0.0869994	2.92029e+08	0.0713338	2.02553e+08	0.0693976
Csa_010426925.1	PREDICTED: fructose-bisphosphate aldolase 8, cytosolic [Camelina sativa]	0	373	20	358	1.01077e+06	0.0139346	1.25604e+09	0.161901	8.61394e+08	0.120159	1.46754e+09	0.159242	1.73943e+09	0.166158	1.25606e+09	0.168291
Csa_010443768.1	PREDICTED: 40S ribosomal protein S15a-1 [Camelina sativa]	0	95	3	130	366604	0.0139181	4.86932e+08	0.172843	2.98716e+08	0.11475	4.87253e+08	0.1456	5.91251e+08	0.155535	4.24418e+08	0.156597
Csa_010517313.1	PREDICTED: 40S ribosomal protein S15a-like [Camelina sativa]	0	54	0	130	366604	0.0139181	2.83996e+08	0.100809	1.91824e+08	0.0736883	3.15371e+08	0.0942384	3.26324e+08	0.0858427	2.54371e+08	0.0938552
Csa_010435213.1	PREDICTED: serine hydroxymethyltransferase 4 [Camelina sativa]	0	103	11	471	1.32303e+06	0.0138635	2.19861e+08	0.0215405	1.8314e+08	0.0194178	3.51576e+08	0.0289967	2.56321e+08	0.0186106	1.74616e+08	0.0177826
Csa_010508551.1	PREDICTED: phosphoenolpyruvate carboxylase 2 [Camelina sativa]	0	340	3	963	2.68391e+06	0.0137553	8.69939e+08	0.0416861	9.16903e+08	0.0475484	1.13504e+09	0.0457861	1.08354e+09	0.0384782	8.89764e+08	0.0443182
Csa_010413881.1	PREDICTED: 60S ribosomal protein L23 [Camelina sativa]	0	258	12	140	386158	0.0136133	5.97734e+08	0.197019	4.50032e+08	0.160529	6.75392e+08	0.187403	1.07418e+09	0.262389	6.42172e+08	0.220017
Csa_010428118.2	PREDICTED: 40S ribosomal protein Sa-1 [Camelina sativa]	0	327	6	298	818943	0.0135633	6.8465e+08	0.106018	5.33835e+08	0.0894601	9.23738e+08	0.120416	1.07753e+09	0.123655	6.28753e+08	0.101204
Csa_010468018.1	PREDICTED: uncharacterized protein LOC104748022 [Camelina sativa]	0	5	0	116	318246	0.0135404	9.20496e+06	0.00366178	396721	0.000170791	230247	7.71056e-05	355809	0.000104896	373289	0.000154355
Csa_010431613.1	PREDICTED: chaperone protein ClpB4, mitochondrial-like [Camelina sativa]	0	22	0	830	2.27495e+06	0.0135276	198565929	0.0110396	164838158	0.00991786	311389785	0.0145739	340252280	0.0140191	310879552	0.0179659
Csa_010498352.1	PREDICTED: serine/arginine-rich SC35-like splicing factor SCL33 [Camelina sativa]	0.009	1	0	201	550176	0.0135093		0		0		0		0		0
Csa_010463964.1	PREDICTED: 40S ribosomal protein Sa-2 [Camelina sativa]	0	180	0	267	729190	0.013479	2.61291e+08	0.0451587	2.92786e+08	0.0547618	4.25845e+08	0.0619569	4.64164e+08	0.0594509	2.19012e+08	0.0393451
Csa_010464944.1	PREDICTED: serine/arginine-rich SC35-like splicing factor SCL33 isoform X1 [Camelina sativa]	0.009	1	0	206	550176	0.0131814		0		0		0		0		0
Csa_010442128.1	PREDICTED: glucose-6-phosphate isomerase, cytosolic [Camelina sativa]	0	13	6	560	1.49464e+06	0.0131728	2.46977e+07	0.00203515	1.9767e+07	0.00176275	1.93583e+07	0.00134286	3.47733e+07	0.00212352	2.46377e+07	0.00211031
Csa_010485861.1	PREDICTED: 40S ribosomal protein Sa-2-like [Camelina sativa]	0	180	0	274	729190	0.0131346	2.61291e+08	0.044005	2.92786e+08	0.0533628	4.25845e+08	0.0603741	4.64164e+08	0.0579321	2.19012e+08	0.0383399
Csa_010505663.1	PREDICTED: mannose-1-phosphate guanylyltransferase 1 [Camelina sativa]	0	19	4	361	956953	0.0130831	3.72279e+07	0.00475872	7.83175e+06	0.0010834	1.72786e+07	0.0018593	4.33327e+07	0.00410494	2.6479e+07	0.00351827
Csa_010430893.2	PREDICTED: receptor for activated C kinase 1A-like [Camelina sativa]	0	91	0	299	789639	0.0130342	3.12539e+08	0.0482348	1.59186e+08	0.0265872	3.59478e+08	0.0467036	3.19854e+08	0.0365829	2.59089e+08	0.0415634
Csa_010469823.1	PREDICTED: histone H1.2-like [Camelina sativa]	0	11	3	277	730658	0.0130185		0		0		0		0		0
Csa_010421674.1	PREDICTED: 40S ribosomal protein S24-2 [Camelina sativa]	0	36	2	133	349964	0.0129867	3.37718e+07	0.0117174	2.95242e+07	0.0110858	3.17252e+07	0.00926623	4.94047e+07	0.0127032	2.1714e+07	0.00783107
Csa_010506468.1	PREDICTED: transketolase-2, chloroplastic [Camelina sativa]	0	422	0	739	1.93653e+06	0.0129332	1.72458e+09	0.107688	1.75452e+09	0.118564	2.66902e+09	0.1403	2.98015e+09	0.137909	2.1236e+09	0.137836
Csa_010432576.1	PREDICTED: protein TIC 22, chloroplastic [Camelina sativa]	0	5	3	272	705282	0.0127974	2.10005e+06	0.000356277	416224	7.64181e-05	3.10773e+06	0.000443837	3.01623e+06	0.000379222	1.37128e+06	0.00024182
Csa_010465064.1	PREDICTED: nucleolar protein 56-like [Camelina sativa]	0	5	0	498	1280567	0.0126911	1.46264e+07	0.00135531	4.88284e+06	0.000489645	10111577	0.00078875	20555816	0.00141157	1.47416e+07	0.00141987
Csa_010426916.1	PREDICTED: monodehydroascorbate reductase 1, peroxisomal [Camelina sativa]	0	154	19	434	1.1051e+06	0.0125672	3.8182e+08	0.0405972	2.99646e+08	0.0344792	5.6233e+08	0.0503328	5.58327e+08	0.0439944	4.67402e+08	0.0516577
Csa_010459860.1	PREDICTED: uncharacterized protein LOC104740846 [Camelina sativa]	0	5	0	125	318246	0.0125655	9.20496e+06	0.00339813	396721	0.000158494	230247	7.1554e-05	355809	9.73431e-05	373289	0.000143241
Csa_010462396.1	PREDICTED: uncharacterized protein LOC104742986 isoform X1 [Camelina sativa]	0	72	18	340	853751	0.0123931	1.72758e+08	0.023447	8.10865e+07	0.0119099	1.52547e+08	0.017429	2.2965e+08	0.0230986	1.46852e+08	0.0207173
Csa_010452310.1	PREDICTED: ferredoxin-dependent glutamate synthase 1, chloroplastic/mitochondrial [Camelina sativa]	0	477	42	1620	4.04706e+06	0.0123297	1.08646e+09	0.0309475	2.07003e+09	0.0638115	1.50614e+09	0.0361161	1.36762e+09	0.02887	1.1261e+09	0.0333424
Csa_010476269.1	PREDICTED: glyceraldehyde-3-phosphate dehydrogenase GAPA2, chloroplastic isoform X1 [Camelina sativa]	0	800	4	399	975713	0.0120691	4.98865e+08	0.057695	4.84446e+08	0.0606333	5.79679e+08	0.056437	4.28943e+08	0.0367642	4.18819e+08	0.0503486
Csa_010439815.1	PREDICTED: 60S ribosomal protein L11-1 isoform X1 [Camelina sativa]	0	310	8	183	445573	0.0120169	2.83972e+08	0.0716065	146266597	0.0399147	3.6283e+08	0.0770198	465280428	0.0869484	2.7114e+08	0.0710685
Csa_010474737.1	PREDICTED: F-box/LRR-repeat protein At1g06630-like [Camelina sativa]	0	119	0	413	998139	0.011928	2.94592e+07	0.00329154	1.00659e+08	0.0121714	6.24643e+07	0.00587533	8.64091e+07	0.00715496	4.53721e+07	0.00526954
Csa_019101720.1	PREDICTED: F-box/LRR-repeat protein At1g06630-like isoform X1 [Camelina sativa]	0	119	0	413	998139	0.011928	2.94592e+07	0.00329154	1.00659e+08	0.0121714	6.24643e+07	0.00587533	8.64091e+07	0.00715496	4.53721e+07	0.00526954
Csa_010496356.1	PREDICTED: transmembrane 9 superfamily member 12-like isoform X3 [Camelina sativa]	0	9	3	664	1.59734e+06	0.0118729	1.43928e+07	0.00100024	1.36489e+06	0.000102652	14305750	0.000836936	1.46952e+07	0.00075684	1.15294e+07	0.000832864
Csa_010514215.1	PREDICTED: 60S ribosomal protein L5-1 [Camelina sativa]	0	77	12	302	723502	0.0118239	2.65923e+08	0.0406328	1.18975e+08	0.0196737	2.35944e+08	0.0303495	2.03734e+08	0.0230704	1.68051e+08	0.0266912
Csa_010448484.1	PREDICTED: acyl carrier protein 4, chloroplastic-like [Camelina sativa]	0	113	4	136	324081	0.0117609	2.28677e+08	0.0775911	2.55614e+08	0.0938608	2.87321e+08	0.0820689	2.75185e+08	0.0691964	1.95503e+08	0.0689521
Csa_010493973.1	PREDICTED: 60S ribosomal protein L22-3 [Camelina sativa]	0	104	5	124	292231	0.0116314	2.54481e+08	0.0947026	1.497e+08	0.0602889	2.48654e+08	0.0778975	3.60791e+08	0.099502	2.59084e+08	0.10022
Csa_010503983.1	PREDICTED: RNA-binding protein CP33, chloroplastic-like [Camelina sativa]	0	37	4	330	765622	0.0114506	1.05869e+08	0.0148042	51273716	0.00775924	75204173	0.00885274	1.22003e+08	0.0126431	7.48599e+07	0.010881
Csa_010511187.1	PREDICTED: uncharacterized protein LOC104787319 [Camelina sativa]	0	12	3	229	523598	0.0112847	8.76233e+06	0.00176568	1.90835e+07	0.00416161	9.07747e+06	0.00153985	1.47706e+07	0.00220578	8.21289e+06	0.00172026
Csa_010419797.1	PREDICTED: cysteine proteinase inhibitor 1-like [Camelina sativa]	0	60	4	102	232683	0.0112588	3.53321e+07	0.0159844	1.96544e+07	0.00962271	5.55296e+07	0.0211483	5.7946e+07	0.0194277	5.12397e+07	0.0240957
Csa_010452271.1	PREDICTED: histone deacetylase HDT3 [Camelina sativa]	0	4	0	301	678936	0.0111324	1.7131e+07	0.00262631	1.09694e+06	0.000181994	6.29826e+06	0.000812838	1.09782e+07	0.00124727	5.47194e+06	0.000871984
Csa_010435690.1	PREDICTED: LOW QUALITY PROTEIN: putative transcription factor bHLH086 [Camelina sativa]	0.007	168	0	289	651618	0.0111281	2.86268e+08	0.0457092	4.36693e+08	0.0754599	4.60008e+08	0.0618325	7.08178e+08	0.0837998	2.98317e+08	0.0495124
Csa_010490865.1	PREDICTED: histone deacetylase HDT3 [Camelina sativa]	0	5	1	302	678936	0.0110956	1.80719e+07	0.00276137	1.09694e+06	0.000181391	8.49122e+06	0.00109223	1.09782e+07	0.00124314	7.98664e+06	0.0012685
Csa_019088727.1	PREDICTED: uncharacterized protein LOC104726010 isoform X1 [Camelina sativa]	0	35	5	137	307721	0.0110857	6.46932e+07	0.0217904	1.24575e+08	0.0454096	1.18721e+08	0.0336632	1.84898e+08	0.046154	9.42198e+07	0.032988
Csa_010435429.1	PREDICTED: biotin carboxylase, chloroplastic [Camelina sativa]	0	79	13	535	1.20098e+06	0.0110792	1.44161e+08	0.0124343	1.33224e+08	0.0124356	2.15379e+08	0.0156386	2.30185e+08	0.0147137	1.69247e+08	0.015174
Csa_010420125.1	PREDICTED: beta carbonic anhydrase 2, chloroplastic-like [Camelina sativa]	0	351	14	259	578232	0.0110187	1.00954e+09	0.179868	7.73317e+08	0.149106	1.33717e+09	0.200557	1.46794e+09	0.193824	1.33048e+09	0.2464
Csa_010440545.1	PREDICTED: uncharacterized protein LOC104723825 isoform X1 [Camelina sativa]	0	2	0	397	878423	0.0109204	14169574	0.001647		0	22551196	0.00220663	17184244	0.00148026	11450594	0.00138348
Csa_010434437.1	PREDICTED: psbP domain-containing protein 1, chloroplastic isoform X1 [Camelina sativa]	0	27	6	288	629815	0.0107931	6.52975e+07	0.0104624	9.27974e+07	0.016091	8.28184e+07	0.0111708	6.43133e+07	0.00763671	4.5556e+07	0.00758729
Csa_019091431.1	PREDICTED: LOW QUALITY PROTEIN: nucleolar GTP-binding protein 1 [Camelina sativa]	0.007	1	0	669	1455327	0.0107365	443385	3.05832e-05		0		0		0		0
Csa_010434676.1	PREDICTED: 60S ribosomal protein L15-1 [Camelina sativa]	0	78	3	204	443692	0.0107344	2.38156e+08	0.0538715	1.4093e+08	0.0344995	2.39997e+08	0.045701	3.44496e+08	0.05775	2.04262e+08	0.0480277
Csa_010457530.1	PREDICTED: nucleolar GTP-binding protein 1 [Camelina sativa]	0	2	1	671	1455327	0.0107045	443385	3.04921e-05	3.65561e+06	0.000272067	5470350	0.000316696		0	4.58262e+06	0.000327586
Csa_019089559.1	PREDICTED: catalase-2 isoform X1 [Camelina sativa]	0	289	12	495	1.05443e+06	0.0105133	3.97062e+08	0.0370153	3.67105e+08	0.0370359	4.97661e+08	0.0390551	4.65608e+08	0.0321672	389949305	0.0377865
Csa_010483364.1	PREDICTED: transcription factor bHLH82 [Camelina sativa]	0.007	168	0	311	651618	0.0103409	2.86268e+08	0.0424757	4.36693e+08	0.0701219	4.60008e+08	0.0574585	7.08178e+08	0.0778718	2.98317e+08	0.04601
Csa_010438099.1	PREDICTED: transcription factor bHLH69 isoform X1 [Camelina sativa]	0.007	168	0	313	651618	0.0102748	2.86268e+08	0.0422043	4.36693e+08	0.0696739	4.60008e+08	0.0570914	7.08178e+08	0.0773743	2.98317e+08	0.045716
Csa_019099669.1	PREDICTED: protein plastid transcriptionally active 16, chloroplastic-like [Camelina sativa]	0	117	7	560	1.14645e+06	0.010104	8.85308e+07	0.00729516	2.20616e+07	0.00196738	1.38698e+08	0.00962128	102315049	0.00624812	6.71097e+07	0.00574819
Csa_010489787.1	PREDICTED: rRNA biogenesis protein RRP5-like [Camelina sativa]	0	11	0	1892	3.87095e+06	0.0100977	5.82054e+06	0.000141961	3.07114e+06	8.1062e-05	3.74719e+06	7.69369e-05	3.72135e+06	6.72632e-05	4.84614e+06	0.000122859
Csa_010414374.1	PREDICTED: proliferating cell nuclear antigen 2 [Camelina sativa]	0	14	6	263	534084	0.0100226	4.49424e+07	0.00788548	3.70372e+06	0.000703269	4.63312e+07	0.00684333	4.35788e+07	0.00566654	2.92122e+07	0.00532773
Csa_010476484.1	PREDICTED: uncharacterized protein LOC104755731 [Camelina sativa]	0	6	2	195	395533	0.0100109	23290646	0.00551157	1.34858e+07	0.00345368	2.97385e+07	0.00592426	3.20261e+07	0.00561652	20610662	0.0050698
Csa_010428139.1	PREDICTED: lipoxygenase 4, chloroplastic [Camelina sativa]	0	9	0	924	1.86925e+06	0.00998441	3.11618e+06	0.000155625	15765072	0.000852045	10739004	0.000451484	1.33454e+06	4.93921e-05	1.1817e+06	6.13435e-05
Csa_010513167.1	PREDICTED: probable glutamyl-tRNA reductase 3, chloroplastic, partial [Camelina sativa]	0	5	0	437	883369	0.00997671	1.29768e+07	0.0013703	1.64717e+07	0.00188233	2.33441e+07	0.00207513	1.26323e+07	0.000988551	7.49379e+06	0.000822534
Csa_019087803.1	PREDICTED: cysteine synthase 1 isoform X1 [Camelina sativa]	0	110	2	347	700923	0.00996937	2.75407e+08	0.0366246	1.90968e+08	0.0274833	3.12808e+08	0.0350186	2.8342e+08	0.0279318	2.07659e+08	0.0287049
Csa_010498340.1	PREDICTED: rRNA biogenesis protein RRP5 isoform X1 [Camelina sativa]	0	11	0	1926	3.87095e+06	0.00991945	5.82054e+06	0.000139455	3.07114e+06	7.9631e-05	3.74719e+06	7.55787e-05	3.72135e+06	6.60758e-05	4.84614e+06	0.000120691
Csa_010493643.1	PREDICTED: glucose-1-phosphate adenylyltransferase small subunit, chloroplastic [Camelina sativa]	0	111	18	523	1.04418e+06	0.00985369	2.96543e+08	0.0261646	2.32213e+08	0.0221729	3.09639e+08	0.0229987	3.61579e+08	0.0236429	2.87736e+08	0.0263893
Csa_010426990.1	PREDICTED: 60S ribosomal protein L12-2 [Camelina sativa]	0	325	2	166	331132	0.0098451	8.28035e+08	0.23018	4.40945e+08	0.132652	7.84837e+08	0.183663	9.80556e+08	0.202005	6.00225e+08	0.173436
Csa_019091301.1	PREDICTED: proline-rich protein 36-like isoform X1 [Camelina sativa]	0	3	1	514	1.00808e+06	0.00967965	1315364	0.000118089		0	1.34229e+06	0.000101446	3.74942e+06	0.000249459	1.8006e+06	0.000168031
Csa_010470268.1	PREDICTED: glutamyl-tRNA reductase 1, chloroplastic [Camelina sativa]	0	16	3	546	1.06643e+06	0.00963979	2.6358e+07	0.00222766	2.09074e+07	0.00191226	4.2634e+07	0.00303328	3.55418e+07	0.0022261	2.74945e+07	0.00241539
Csa_010422976.1	PREDICTED: 40S ribosomal protein S15-4-like [Camelina sativa]	0	19	3	152	293113	0.00951739	4.65583e+07	0.0141345	2.34768e+07	0.00771318	3.14666e+07	0.00804184	1.44488e+07	0.00325078	1.38983e+07	0.00438585
Csa_010466479.1	PREDICTED: 36.4 kDa proline-rich protein-like [Camelina sativa]	0	1	0	371	714104	0.0094998	6.78367e+06	0.00084376	9020148	0.00121417	6.70931e+06	0.000702512	4701243	0.000433348	5825855	0.000753216
Csa_010435371.1	PREDICTED: fasciclin-like arabinogalactan protein 2 [Camelina sativa]	0	7	3	420	799751	0.00939793	3.78438e+07	0.00415789	1.87685e+07	0.00223161	3.70091e+07	0.00342302	1.81726e+07	0.00147967	3.13057e+07	0.00357526
Csa_010421033.1	PREDICTED: 60S ribosomal protein L10a-3-like [Camelina sativa]	0	45	2	217	408892	0.00929984	2.53847e+08	0.0539808	1.24618e+08	0.0286786	239969427	0.0429582	2.80529e+08	0.0442096	2.08107e+08	0.0460003
Csa_010462063.1	PREDICTED: photosystem I reaction center subunit VI-2, chloroplastic [Camelina sativa]	0	18	1	145	272300	0.00926842	72969899	0.0232222	3.64144e+07	0.0125413	8.38771e+07	0.0224711	43393419	0.0102342	53488514	0.017694
Csa_019097423.1	PREDICTED: receptor for activated C kinase 1A-like [Camelina sativa]	0	71	0	344	645966	0.00926783	2.34897e+08	0.0315099	9.94822e+07	0.0144419	2.89554e+08	0.032698	2.45795e+08	0.024435	1.99525e+08	0.0278211
Csa_010413613.1	PREDICTED: methylenetetrahydrofolate reductase 1 isoform X1 [Camelina sativa]	0	90	10	592	1.10169e+06	0.00918465	1.18703e+08	0.00925266	9.61497e+07	0.00811082	181003057	0.0118772	1.65132e+08	0.0095391	1.13003e+08	0.00915588
Csa_010432453.1	PREDICTED: V-type proton ATPase subunit H [Camelina sativa]	0	30	6	452	835816	0.00912638	7.48257e+07	0.00763907	4.69791e+07	0.00519044	9.18688e+07	0.0078955	9.14233e+07	0.00691698	7.75049e+07	0.00822478
Csa_010422800.1	PREDICTED: 50S ribosomal protein L5, chloroplastic-like isoform X1 [Camelina sativa]	0	86	10	264	485492	0.00907622	1.90819e+08	0.0333539	1.35863e+08	0.0257001	1.90035e+08	0.0279628	2.5147e+08	0.0325747	1.77001e+08	0.0321592
Csa_010465576.1	PREDICTED: uncharacterized protein LOC104745900 [Camelina sativa]	0	21	2	268	492312	0.00906636	2.99831e+07	0.00516261	1.86272e+07	0.00347097	4.15168e+07	0.00601781	4.68342e+07	0.00597622	2.97896e+07	0.00533168
Csa_010419295.1	PREDICTED: transcription factor bHLH66-like [Camelina sativa]	0.007	168	0	355	651618	0.00905923	2.86268e+08	0.0372111	4.36693e+08	0.0614308	4.60008e+08	0.0503369	7.08178e+08	0.0682201	2.98317e+08	0.0403073
Csa_010462616.1	PREDICTED: glutamyl-tRNA reductase 2, chloroplastic-like [Camelina sativa]	0	10	0	483	883369	0.00902655	1.45252e+07	0.00138773	1.75747e+07	0.0018171	3.20416e+07	0.00257702	2.28662e+07	0.00161899	1.53643e+07	0.00152581
Csa_010441141.1	PREDICTED: 40S ribosomal protein S19-1 [Camelina sativa]	0	59	3	143	259411	0.0089532	3.12532e+08	0.100852	1.36575e+08	0.0476952	2.50799e+08	0.0681302	1.91812e+08	0.0458711	1.81443e+08	0.0608607
Csa_010431368.1	PREDICTED: 50S ribosomal protein 6, chloroplastic-like [Camelina sativa]	0	7	1	135	244643	0.00894388	2.79116e+07	0.00954069	9.12221e+06	0.00337447	7.84053e+06	0.00225612	4.01645e+07	0.0101744	3.2896e+07	0.0116881
Csa_010492753.1	PREDICTED: 50S ribosomal protein 6, chloroplastic-like [Camelina sativa]	0	5	0	135	244643	0.00894388	25067849	0.00856863	8948465	0.00331019	6484024	0.00186578	39384812	0.00997684	3.22178e+07	0.0114471
Csa_010432391.1	PREDICTED: 30S ribosomal protein S16-1, chloroplastic [Camelina sativa]	0	35	4	113	204763	0.00894334	7.44592e+07	0.0304066	86136870	0.038067	8.76574e+07	0.0301342	8.67726e+07	0.0262604	6.68116e+07	0.0283601
Csa_010480510.1	PREDICTED: translation initiation factor IF-2, chloroplastic-like [Camelina sativa]	0	35	0	997	1.7992e+06	0.0089066	3.64876e+07	0.0016888	1.44575e+07	0.000724161	34212768	0.00133304	5.03419e+07	0.00172676	3.39332e+07	0.00163254
Csa_010422938.1	PREDICTED: actin-7 [Camelina sativa]	0	223	6	377	660307	0.00864433	149408134	0.0182878	1.1535e+08	0.0152797	2.04364e+08	0.0210578	1.7477e+08	0.0158534	1.18396e+08	0.0150637
Csa_010421691.1	PREDICTED: membrane-associated protein VIPP1, chloroplastic [Camelina sativa]	0	31	8	326	568203	0.00860227	248868879	0.0352274	1.13528e+08	0.017391	2.39827e+08	0.0285778	241077054	0.0252893	2.02245e+08	0.0297574
Csa_010463547.1	PREDICTED: mitochondrial outer membrane protein porin 1-like [Camelina sativa]	0	64	8	276	475203	0.0084976	1.05041e+08	0.0175622	1.55205e+08	0.0280825	2.23221e+08	0.0314178	1.39758e+08	0.0173167	8.69933e+07	0.0151186
Csa_010500399.1	PREDICTED: putative DNA-binding protein At1g48610 [Camelina sativa]	0	9	2	212	357906	0.00833219		0		0	74972.3	1.37377e-05	93345.1	1.50575e-05	66487.7	1.50432e-05
Csa_010436170.1	PREDICTED: dynamin-related protein 1A [Camelina sativa]	0	16	7	610	1.02349e+06	0.00828099	4.16255e+06	0.000314889	6.6605e+06	0.000545274	17543245	0.0011172	2.44144e+07	0.00136872	1.73245e+07	0.00136228
Csa_010441489.1	PREDICTED: 50S ribosomal protein L19-2, chloroplastic [Camelina sativa]	0	22	2	229	382865	0.00825157	2.26713e+06	0.000456846	1.31009e+06	0.000285697	2.36675e+06	0.000401483	1.36668e+06	0.000204094	1.46329e+06	0.000306499
Csa_019090056.1	PREDICTED: subtilisin-like protease SBT3.6 isoform X1 [Camelina sativa]	0	8	1	779	1.29901e+06	0.00823005	13022434	0.000771406	1.97498e+06	0.000126609	1942145	9.68488e-05	2691499	0.000118156	2.46033e+06	0.000151492
Csa_010501498.1	PREDICTED: translation initiation factor IF-2, chloroplastic-like [Camelina sativa]	0	40	2	1079	1.7992e+06	0.00822973	4.18951e+07	0.00179172	2.9256e+07	0.00135404	50581855	0.00182106	7.07612e+07	0.0022427	4.18814e+07	0.0018618
Csa_010432134.2	PREDICTED: heterodimeric geranylgeranyl pyrophosphate synthase large subunit 1, chloroplastic [Camelina sativa]	0	2	2	377	628262	0.00822481	3.727e+06	0.000456191	3.04701e+06	0.000403619	2.95883e+06	0.000304879	2.17699e+06	0.000197475	1.53087e+06	0.000194774
Csa_010490475.1	PREDICTED: glutamyl-tRNA reductase 2, chloroplastic-like [Camelina sativa]	0	10	0	533	883369	0.00817978	1.45252e+07	0.00125755	1.75747e+07	0.00164664	3.20416e+07	0.00233527	2.28662e+07	0.00146712	1.53643e+07	0.00138267
Csa_010467390.1	PREDICTED: peptidyl-prolyl cis-trans isomerase CYP19-1-like [Camelina sativa]	0	153	5	172	280499	0.00804877	4.57836e+08	0.122831	2.53668e+08	0.0736505	5.00986e+08	0.113148	7.03796e+08	0.139932	4.27871e+08	0.119321
Csa_010432628.1	PREDICTED: glycine dehydrogenase (decarboxylating) 1, mitochondrial [Camelina sativa]	0	286	25	1045	1.69756e+06	0.00801746	1.30645e+09	0.0576903	1.24972e+09	0.0597219	1.49264e+09	0.0554866	1.47857e+09	0.0483865	1.31136e+09	0.0601922
Csa_010512565.1	PREDICTED: uncharacterized protein LOC104788492 [Camelina sativa]	0	6	2	273	440801	0.00796905	392521	6.63482e-05	1.61778e+07	0.00295935	2.01626e+06	0.000286902		0	1.19947e+06	0.000210747
Csa_010433728.1	PREDICTED: rhodanese-like domain-containing protein 11, chloroplastic [Camelina sativa]	0	9	3	290	462112	0.00786459	1.78141e+07	0.00283462	9.4249e+06	0.001623	1.71503e+07	0.00229733	33380397	0.00393633	1.90923e+07	0.00315786
Csa_019102232.1	PREDICTED: uncharacterized protein LOC104698757 [Camelina sativa]	0.039	2	0	406	646306	0.00785667	2.10299e+06	0.000239023	733901	9.02714e-05	1.85862e+06	0.000177834	2.88045e+06	0.000242623	2.15034e+06	0.000254047
Csa_010438970.1	PREDICTED: 31 kDa ribonucleoprotein, chloroplastic [Camelina sativa]	0	101	1	300	476887	0.00784551	6.04617e+08	0.0930009	4.12798e+08	0.0687155	5.72035e+08	0.0740715	5.9769e+08	0.0681322	5.00584e+08	0.0800367
Csa_010505624.1	PREDICTED: photosynthetic NDH subunit of lumenal location 1, chloroplastic isoform X1 [Camelina sativa]	0	16	0	237	375819	0.00782631	2.06514e+07	0.00402095	1.29406e+07	0.00272675	2.70923e+07	0.00444067	3.18764e+07	0.00459959	2.41475e+07	0.00488718
Csa_010509010.1	PREDICTED: photosynthetic NDH subunit of lumenal location 1, chloroplastic [Camelina sativa]	0	16	0	237	375819	0.00782631	2.06514e+07	0.00402095	1.29406e+07	0.00272675	2.70923e+07	0.00444067	3.18764e+07	0.00459959	2.41475e+07	0.00488718
Csa_010477907.2	PREDICTED: tubulin beta-2 chain-like [Camelina sativa]	0	68	0	308	486666	0.00779843	4.67108e+08	0.0699833	1.25337e+08	0.020322	2.65624e+08	0.0335017	4.16123e+08	0.0462029	2.9394e+08	0.0457764
Csa_010447298.1	PREDICTED: UDP-sulfoquinovose synthase, chloroplastic-like [Camelina sativa]	0	47	11	480	750616	0.00771798	4.07869e+07	0.0039211	4.03324e+07	0.00419615	3.98716e+07	0.0032268	4.05079e+07	0.002886	33332032	0.00333085
Csa_019101940.1	PREDICTED: probable pectinesterase/pectinesterase inhibitor 35 [Camelina sativa]	0	27	0	435	677147	0.00768281	1.41727e+07	0.00150345	1.47299e+07	0.00169103	1.52419e+07	0.00136113	2.33596e+07	0.00183643	2.18147e+07	0.00240544
Csa_010428631.1	PREDICTED: defensin-like protein 1 [Camelina sativa]	0	86	1	80	123876	0.00764232	49586762	0.0286025	4.27268e+07	0.0266716	7.35152e+07	0.0356975	6.99511e+07	0.0299022	7.41034e+07	0.0444306
Csa_010439370.1	PREDICTED: uncharacterized protein LOC104722825 isoform X2 [Camelina sativa]	0.007	14	3	1245	1.90002e+06	0.0075321	168291111	0.00623763	1.78651e+08	0.00716598	225028060	0.00702129	6.66344e+07	0.00183032	43444516	0.00167378
Csa_010442501.1	PREDICTED: RNA-binding protein CP31B, chloroplastic [Camelina sativa]	0	23	2	282	429299	0.00751342	4.14765e+07	0.00678705	3.58449e+07	0.0063477	5.68122e+07	0.00782604	2.51504e+08	0.0304996	2.6613e+08	0.0452667
Csa_010441738.1	PREDICTED: RNA-binding protein CP31B, chloroplastic-like [Camelina sativa]	0	14	0	282	429299	0.00751342	19554510	0.00319982	9.6165e+06	0.00170297	2.45652e+07	0.00338393	2.16908e+08	0.0263042	2.31311e+08	0.0393443
Csa_010461070.1	PREDICTED: glycine cleavage system H protein 3, mitochondrial [Camelina sativa]	0	59	2	166	252663	0.00751208	9.33401e+07	0.0259471	1.19286e+08	0.0358857	1.41957e+08	0.03322	1.48494e+08	0.0305914	9.61205e+07	0.0277742
Csa_010449281.1	PREDICTED: trigger factor-like protein TIG, Chloroplastic [Camelina sativa]	0	71	19	552	838408	0.00749623	2.16424e+08	0.0180923	1.0903e+08	0.00986382	1.78698e+08	0.0125757	2.10745e+08	0.0130562	1.58807e+08	0.0137995
Csa_010420293.1	PREDICTED: 40S ribosomal protein S7-3 [Camelina sativa]	0	67	10	190	286756	0.0074488	2.50265e+08	0.0607818	1.14364e+08	0.030059	2.36219e+08	0.048296	194815195	0.0350645	1.57532e+08	0.0397693
Csa_010481677.1	PREDICTED: elongation factor Tu, chloroplastic [Camelina sativa]	0	613	2	477	714936	0.00739734	3.08435e+07	0.00298382	3.16735e+07	0.00331601	51304204	0.00417815	32983057	0.00236467	21615629	0.00217362
Csa_010414996.1	PREDICTED: NHL repeat-containing protein 2-like [Camelina sativa]	0	34	6	1059	1.58491e+06	0.00738646	90079199	0.00392515	4.27815e+07	0.00201743	7.88901e+07	0.00289385	8.24947e+07	0.00266396	8.27662e+07	0.00374879
Csa_010497997.2	PREDICTED: uncharacterized protein LOC104775774 [Camelina sativa]	0	25	9	659	985653	0.00738185	5.49751e+07	0.00384954	4.96784e+07	0.00376462	6.91271e+07	0.00407486	6.89576e+07	0.00357845	3.69432e+07	0.00268895
Csa_010443776.1	PREDICTED: actin-depolymerizing factor 4 [Camelina sativa]	0	8	1	139	205573	0.00729926	1.24809e+07	0.00414342	4.47343e+06	0.00160718	17151570	0.00479335	1.33541e+07	0.00328547	2.83028e+07	0.00976672
Csa_010508934.1	PREDICTED: 60S acidic ribosomal protein P0-1 [Camelina sativa]	0	74	0	318	468159	0.00726595	6.11454e+08	0.0887288	3.70369e+08	0.0581629	5.94221e+08	0.0725889	5.89827e+08	0.0634301	5.0961e+08	0.0768678
Csa_010416631.1	PREDICTED: carboxyvinyl-carboxyphosphonate phosphorylmutase, chloroplastic [Camelina sativa]	0	4	3	339	496725	0.00723174	6.3828e+06	0.000868839	1.83337e+07	0.00270078		0	6233338	0.000628809	5490630	0.000776884
Csa_010495333.1	PREDICTED: germin-like protein subfamily 3 member 3 [Camelina sativa]	0	167	0	182	265163	0.00719066	3.60374e+08	0.0913715	5.16382e+08	0.14169	5.98803e+08	0.127809	4.0391e+08	0.0758947	250211072	0.0659431
Csa_010464828.1	PREDICTED: 60S acidic ribosomal protein P0-3 [Camelina sativa]	0	88	1	324	468159	0.0071314	6.32261e+08	0.0900491	3.78129e+08	0.0582819	6.26639e+08	0.0751315	6.36639e+08	0.0671965	5.33489e+08	0.0789795
Csa_019083061.1	PREDICTED: triose phosphate/phosphate translocator TPT, chloroplastic-like [Camelina sativa]	0	28	0	144	207533	0.00711297	9.07307e+07	0.029075	8.93672e+07	0.0309923	1.2292e+08	0.0331597	88006656	0.0209002	1.00296e+08	0.0334084
Csa_010477422.1	PREDICTED: protein disulfide isomerase-like 1-1 [Camelina sativa]	0	192	21	508	727950	0.00707236	4.95145e+08	0.0449777	3.32709e+08	0.0327069	5.50707e+08	0.0421121	5.63301e+08	0.0379206	3.95762e+08	0.0373684
Csa_010469553.1	PREDICTED: 26S proteasome non-ATPase regulatory subunit 1 homolog A [Camelina sativa]	0	15	3	1004	1.39161e+06	0.00684087	3.29927e+07	0.0015164	2.44073e+07	0.00121402	4.02957e+07	0.0015591	5.18673e+07	0.00176668	3.99899e+07	0.00191051
Csa_019088702.1	PREDICTED: haloacid dehalogenase-like hydrolase domain-containing protein At4g39970 isoform X2 [Camelina sativa]	0	10	0	287	397264	0.00683163	3.4848e+07	0.00560304	1.84561e+07	0.00321141	49862517	0.00674904	3.42191e+07	0.00407741	1.25574e+07	0.00209871
Csa_010425151.1	PREDICTED: lipoxygenase 2, chloroplastic-like [Camelina sativa]	0	34	1	896	1.23761e+06	0.00681714	53981924	0.00278015	3.15683e+07	0.00175947	5.84051e+07	0.00253217	7.47395e+07	0.0028526	47911624	0.00256488
Csa_010461121.1	PREDICTED: 50S ribosomal protein L11, chloroplastic [Camelina sativa]	0	102	8	222	306578	0.00681577	2.53956e+08	0.0527878	2.72428e+08	0.0612825	3.3435e+08	0.0585057	3.24266e+08	0.0499512	2.5093e+08	0.0542167
Csa_010463860.1	PREDICTED: putative H/ACA ribonucleoprotein complex subunit 1-like protein 1 [Camelina sativa]	0.005	1	1	202	278768	0.00681111		0	10031677	0.00248005	8639979	0.00166154	5.25325e+06	0.000889355	10640545	0.00252666
Csa_010479477.1	PREDICTED: ATP-dependent zinc metalloprotease FTSH 1, chloroplastic-like isoform X2 [Camelina sativa]	0	198	3	724	997203	0.00679785	2.20256e+07	0.00140384	1.63265e+07	0.00112614	1.88124e+07	0.00100938	2.51363e+07	0.0011873	1.7899e+07	0.00118583
Csa_010415772.1	PREDICTED: MLP-like protein 34 [Camelina sativa]	0	33	1	498	681829	0.00675729	1.30255e+08	0.0120696	44365871	0.00444896	1.31215e+08	0.0102354	1.6074e+08	0.0110381	1.50516e+08	0.0144973
Csa_010433071.1	PREDICTED: probable plastid-lipid-associated protein 1, chloroplastic [Camelina sativa]	0	5	0	320	435438	0.00671588	8.40504e+06	0.00121204	1.63066e+07	0.0025448	13071716	0.00158684	1.70579e+07	0.00182295	1.30075e+07	0.00194975
Csa_010431129.1	PREDICTED: thioredoxin M2, chloroplastic-like [Camelina sativa]	0	81	6	187	253757	0.00669736	2.88546e+08	0.0712035	3.08876e+08	0.0824861	3.02942e+08	0.0629315	2.96703e+08	0.0542597	2.24745e+08	0.0576476
Csa_010428671.1	PREDICTED: protoporphyrinogen oxidase 1, chloroplastic-like [Camelina sativa]	0	38	11	539	731174	0.00669512	6.43641e+07	0.0055104	5.45959e+07	0.00505835	5.76118e+07	0.00415215	7.957e+07	0.00504846	6.14835e+07	0.00547146
Csa_010496158.1	PREDICTED: probable plastid-lipid-associated protein 1, chloroplastic [Camelina sativa]	0	5	0	321	435438	0.00669496	8.40504e+06	0.00120827	1.63066e+07	0.00253687	13071716	0.00158189	1.70579e+07	0.00181727	1.30075e+07	0.00194368
Csa_010443559.1	PREDICTED: malate dehydrogenase [NADP], chloroplastic isoform X1 [Camelina sativa]	0	99	14	442	592994	0.00662147	2.96796e+08	0.0309859	2.78951e+08	0.0315169	3.87611e+08	0.0340662	3.45297e+08	0.0267158	2.97126e+08	0.0322443
Csa_010413644.1	PREDICTED: uncharacterized protein LOC104699942 [Camelina sativa]	0	27	1	734	962933	0.00647481	4.69987e+07	0.00295473	5.85988e+07	0.00398686	6.81723e+07	0.00360796	8.10372e+07	0.00377561	6.91284e+07	0.00451746
Csa_010467309.1	PREDICTED: ferredoxin--nitrite reductase, chloroplastic [Camelina sativa]	0	124	21	584	764206	0.00645839	2.92094e+08	0.0230801	3.07316e+08	0.0262791	4.16622e+08	0.0277127	4.58178e+08	0.0268299	3.79829e+08	0.0311967
Csa_010416859.1	PREDICTED: translocon-associated protein subunit alpha [Camelina sativa]	0	21	5	257	335753	0.00644783	1.01623e+08	0.0182468	9.15854e+07	0.0177964	122878531	0.0185735	1.07354e+08	0.0142851	1.07495e+08	0.0200626
Csa_010514598.1	PREDICTED: cell wall protein IFF6-like [Camelina sativa]	0.039	2	0	498	646306	0.00640524	2.10299e+06	0.000194866	733901	7.35947e-05	1.85862e+06	0.000144981	2.88045e+06	0.000197801	2.15034e+06	0.000207115
Csa_010466966.1	PREDICTED: glyoxylate/succinic semialdehyde reductase 1 [Camelina sativa]	0	24	7	289	373481	0.00637818	4.08223e+07	0.0065182	28839521	0.00498343	3.66006e+07	0.00491971	3.27295e+07	0.00387293	2.71759e+07	0.00451045
Csa_010460171.1	PREDICTED: MLP-like protein 423 isoform X1 [Camelina sativa]	0	355	8	154	198025	0.00634639	8.02074e+08	0.240338	4.92091e+08	0.159574	9.82077e+08	0.247728	1.07974e+09	0.239772	6.88676e+08	0.2145
Csa_010425660.1	PREDICTED: mucin-22-like [Camelina sativa]	0.039	2	0	504	646306	0.00632899	2.10299e+06	0.000192546	733901	7.27186e-05	1.85862e+06	0.000143255	2.88045e+06	0.000195447	2.15034e+06	0.000204649
Csa_010504876.1	PREDICTED: probable pectinesterase/pectinesterase inhibitor 35 [Camelina sativa]	0	31	2	529	677147	0.00631762	1.55487e+07	0.00135633	1.59387e+07	0.00150465	1.9275e+07	0.00141543	3.20259e+07	0.00207035	2.52197e+07	0.00228675
Csa_010425691.1	PREDICTED: uncharacterized protein LOC104710740 [Camelina sativa]	0.039	2	0	506	646306	0.00630397	2.10299e+06	0.000191785	733901	7.24312e-05	1.85862e+06	0.000142689	2.88045e+06	0.000194674	2.15034e+06	0.00020384
Csa_010443933.1	PREDICTED: 40S ribosomal protein S19-3 [Camelina sativa]	0	44	2	143	179892	0.00620873	3.23671e+07	0.0104447	6.38084e+06	0.00222833	1.96481e+07	0.00533746	1.25776e+07	0.00300788	1.5736e+07	0.00527829
Csa_010420905.1	PREDICTED: germin-like protein subfamily 3 member 3 [Camelina sativa]	0	178	1	211	265163	0.00620237	4.25214e+08	0.0929936	5.81325e+08	0.137586	6.91584e+08	0.127325	5.03618e+08	0.0816238	347722536	0.0790468
Csa_010490704.1	PREDICTED: glutamate--glyoxylate aminotransferase 1-like [Camelina sativa]	0	60	0	202	253192	0.00618621	2.78635e+08	0.063652	2.65635e+08	0.0656709	3.61404e+08	0.0695011	363873518	0.0616023	290257024	0.0689232
Csa_010423690.1	PREDICTED: GDSL esterase/lipase At5g03610-like [Camelina sativa]	0	17	1	358	445587	0.00614294	4.13437e+07	0.00532911	3.53422e+07	0.00493002	6.09432e+07	0.0066129	53747827	0.00513424	3.2131e+07	0.00430502
Csa_010423952.1	PREDICTED: pyridoxal 5'-phosphate synthase subunit PDX1.3 [Camelina sativa]	0	103	9	309	384281	0.00613786	2.08142e+08	0.0310834	1.85363e+08	0.0299574	2.35055e+08	0.0295502	3.27006e+08	0.0361905	1.89203e+08	0.02937
Csa_010458148.1	PREDICTED: superoxide dismutase [Cu-Zn] 1 [Camelina sativa]	0	29	5	152	188604	0.00612399	2.23075e+07	0.00677227	22319542	0.00733297	6.05411e+07	0.0154724	6.87993e+07	0.0154788	5.20089e+07	0.0164122
Csa_010504999.1	PREDICTED: uncharacterized protein LOC104781903 isoform X1 [Camelina sativa]	0	20	7	601	745360	0.00612094	4.18057e+07	0.00320988	1.54449e+07	0.00128336	3.28534e+07	0.00212352	3.39745e+07	0.0019332	3.98295e+07	0.00317881
Csa_010446586.1	PREDICTED: haloacid dehalogenase-like hydrolase domain-containing protein At4g39970 [Camelina sativa]	0	19	1	321	397264	0.00610803	4.6952e+07	0.00674958	3.01001e+07	0.00468275	6.70089e+07	0.00810918	4.51391e+07	0.00480891	2.1265e+07	0.00317757
Csa_010502904.1	PREDICTED: uncharacterized protein LOC104780133 [Camelina sativa]	0.039	2	0	523	646306	0.00609906	2.10299e+06	0.000185551	733901	7.00768e-05	1.85862e+06	0.000138051	2.88045e+06	0.000188346	2.15034e+06	0.000197214
Csa_010424384.1	PREDICTED: glutathione synthetase, chloroplastic-like [Camelina sativa]	0	18	0	516	633265	0.00605707	3.96116e+07	0.00354243	2.38652e+07	0.00230969	4.95886e+07	0.00373321	4.98013e+07	0.00330057	4.70021e+07	0.00436919
Csa_010458260.1	PREDICTED: probable elongation factor 1-gamma 1 [Camelina sativa]	0	114	6	415	504980	0.00600555	6.70653e+07	0.00745724	3.59151e+07	0.00432183	8.67904e+07	0.00812407	6.3657e+07	0.00524561	4.36982e+07	0.00505068
Csa_010473642.1	PREDICTED: 2-C-methyl-D-erythritol 2,4-cyclodiphosphate synthase, chloroplastic-like [Camelina sativa]	0	7	1	238	282051	0.00584893	8.97586e+06	0.00174031	3.91978e+06	0.000822475	1.30624e+07	0.00213205	8.88194e+06	0.00127623	1.17283e+07	0.0023637
Csa_010463507.1	PREDICTED: uncharacterized protein LOC104744195 [Camelina sativa]	0.04	3	1	486	575937	0.00584878	1.9553e+07	0.00185654	466589	4.79443e-05	1.74409e+07	0.00139406	26791688	0.00188522	1.15401e+07	0.00113896
Csa_010432788.1	PREDICTED: aspartate aminotransferase, chloroplastic isoform X1 [Camelina sativa]	0	50	8	495	585535	0.00583813	1.24114e+08	0.0115703	1.02217e+08	0.0103123	167453770	0.0131413	2.41136e+08	0.0166592	1.80433e+08	0.0174841
Csa_010455131.1	PREDICTED: glutathione synthetase, chloroplastic [Camelina sativa]	0	18	0	536	633265	0.00583106	3.96116e+07	0.00341025	2.38652e+07	0.00222351	4.95886e+07	0.00359391	4.98013e+07	0.00317742	4.70021e+07	0.00420616
Csa_010502763.1	PREDICTED: uncharacterized CRM domain-containing protein At3g25440, chloroplastic-like [Camelina sativa]	0.023	2	2	545	637709	0.00577501		0	5.40358e+06	0.000495135	12191103	0.000868953	6211413	0.000389755	7.43334e+06	0.000654216
Csa_019094090.1	PREDICTED: inner membrane protein ALBINO3, chloroplastic isoform X1 [Camelina sativa]	0	8	5	464	541180	0.00575639	3.70488e+07	0.00368455	3.44814e+06	0.000371112	5.34725e+06	0.000447675	7.16826e+06	0.000528316	5.19849e+06	0.000537395
Csa_010462202.1	PREDICTED: malate dehydrogenase 1, mitochondrial [Camelina sativa]	0	91	8	341	397581	0.00575437	241342342	0.0326593	2.37756e+08	0.034819	261227981	0.0297588	238616412	0.0239301	2.14293e+08	0.0301431
Csa_010421320.1	PREDICTED: vegetative storage protein 2 [Camelina sativa]	0	12	2	270	309244	0.00565281	30278085	0.00517479	16392289	0.0030319	54986752	0.00791123	37868469	0.00479636	2.349e+07	0.00417305
Csa_010460497.2	PREDICTED: 60S ribosomal protein L17-1 [Camelina sativa]	0	35	6	205	233776	0.00562823	2.04927e+08	0.0461289	1.20812e+08	0.0294303	1.97422e+08	0.0374104	2.81859e+08	0.0470194	1.81576e+08	0.0424853
Csa_010453511.1	PREDICTED: mitochondrial phosphate carrier protein 3, mitochondrial isoform X1 [Camelina sativa]	0	52	4	381	428197	0.00554683	2.2082e+08	0.026745	6.49217e+07	0.00850948	1.17309e+08	0.0119607	130892516	0.0117486	1.23086e+08	0.0154959
Csa_010447115.1	PREDICTED: 3-ketoacyl-CoA synthase 16-like [Camelina sativa]	0.016	3	1	484	541109	0.00551781		0	5.5593e+06	0.000573605		0	2.54314e+06	0.000179689		0
Csa_010435622.1	PREDICTED: peptidyl-prolyl cis-trans isomerase CYP38, chloroplastic isoform X2 [Camelina sativa]	0	87	10	438	488112	0.00550012	2.11521e+08	0.0222848	2.86523e+08	0.0326681	2.38264e+08	0.0211317	3.16292e+08	0.0246952	1.8431e+08	0.020184
Csa_010420406.1	PREDICTED: NADP-dependent alkenal double bond reductase P1-like [Camelina sativa]	0	3	0	346	379078	0.00540729	7.20783e+06	0.000961295	499180	7.20476e-05		0	1.00832e+06	9.96599e-05	2.87169e+06	0.000398103
Csa_010476773.1	PREDICTED: serine/arginine-rich splicing factor SR45-like [Camelina sativa]	0.01	1	1	417	454886	0.00538386		0		0		0	7347070	0.000602527	2.43629e+06	0.000280238
Csa_010465201.1	PREDICTED: serine/arginine-rich SC35-like splicing factor SCL30A [Camelina sativa]	0.02	4	1	263	285906	0.0053653	2.48155e+06	0.000435407	2.05521e+07	0.00390246	4.84213e+06	0.000715204	3.80254e+06	0.000494443	3.03147e+06	0.000552881
Csa_010479758.1	PREDICTED: uncharacterized protein LOC104758569 [Camelina sativa]	0	10	3	382	412459	0.00532898	1.23102e+07	0.00148706	1.69188e+07	0.00221179	1.34972e+07	0.00137255	1.60651e+07	0.00143819	1.60102e+07	0.00201032
Csa_010459234.1	PREDICTED: tubulin beta-2 chain-like [Camelina sativa]	0	216	4	451	486666	0.00532576	1.00039e+09	0.102357	3.91644e+08	0.0433664	8.65582e+08	0.0745558	1.15299e+09	0.087427	8.65936e+08	0.0920965
Csa_010503294.1	PREDICTED: protein TOC75-3, chloroplastic [Camelina sativa]	0	69	15	821	880885	0.00529545	1.0881e+08	0.00611579	8.53125e+07	0.00518929	1.56722e+08	0.00741544	2.10183e+08	0.00875493	1.44501e+08	0.00844232
Csa_010463509.1	PREDICTED: 40S ribosomal protein S3-1-like [Camelina sativa]	0	102	0	127	134474	0.00522589	5.76441e+08	0.20945	3.58055e+08	0.140794	5.58766e+08	0.170913	7.94713e+08	0.213996	5.19695e+08	0.196281
Csa_010420118.1	PREDICTED: 40S ribosomal protein S24-1 [Camelina sativa]	0	25	2	133	140807	0.00522517	7.44191e+07	0.0258203	5.10225e+07	0.0191579	8.89423e+07	0.0259781	8.20662e+07	0.0211014	5.73545e+07	0.0206847
Csa_010458280.1	PREDICTED: 2,3-bisphosphoglycerate-independent phosphoglycerate mutase 1-like [Camelina sativa]	0	64	10	557	587011	0.00520137	1.70767e+08	0.0141474	1.39717e+08	0.0125265	2.16665e+08	0.0151107	1.81762e+08	0.0111595	1.36351e+08	0.0117419
Csa_010416082.1	PREDICTED: rubisco accumulation factor 1.2, chloroplastic-like [Camelina sativa]	0	30	8	447	463654	0.00511933	4.78357e+07	0.00493825	4.03487e+07	0.00450776	5.89711e+07	0.00512486	5.01893e+07	0.00383974	3.86635e+07	0.00414885
Csa_010491130.1	PREDICTED: uncharacterized protein LOC104768779 [Camelina sativa]	0.005	10	1	441	453260	0.00507266	2.16996e+08	0.022706	214687316	0.0243112	273878449	0.0241251	2.72949e+08	0.0211661	261146808	0.028404
Csa_010492631.1	PREDICTED: NADP-dependent alkenal double bond reductase P2 [Camelina sativa]	0	30	4	374	379078	0.00500247	7.10006e+07	0.0087603	6.65029e+07	0.00887988	8.49002e+07	0.00881834	9.73453e+07	0.00890106	7.94283e+07	0.0101868
Csa_010508472.1	PREDICTED: 3-isopropylmalate dehydratase small subunit 3-like [Camelina sativa]	0	82	8	254	253903	0.00493357	1.68555e+08	0.0306222	1.13661e+08	0.0223468	1.85322e+08	0.0283427	2.441e+08	0.0328648	1.7642e+08	0.0333156
Csa_010434881.1	PREDICTED: importin subunit alpha-2 [Camelina sativa]	0	16	3	534	528897	0.00488828	77603359	0.00670606	4.73287e+07	0.00442611	7.40855e+07	0.00538941	4.85771e+07	0.00311092	4.20988e+07	0.00378148
Csa_010505057.1	PREDICTED: probable plastid-lipid-associated protein 3, chloroplastic [Camelina sativa]	0	23	5	378	371128	0.00484572	5.68164e+07	0.00693602	45879359	0.00606127	8.41871e+07	0.00865175	62175660	0.00562505	44946020	0.00570339
Csa_010505234.1	PREDICTED: S-adenosylmethionine synthase 3 [Camelina sativa]	0	147	9	390	382804	0.00484438	2.53879e+08	0.0300393	1.17369e+08	0.0150289	3.08833e+08	0.0307616	3.04442e+08	0.0266955	2.75828e+08	0.0339241
Csa_010483060.1	PREDICTED: 25S rRNA (cytosine-C(5))-methyltransferase nop2 [Camelina sativa]	0	4	2	658	645606	0.00484248	1.38611e+07	0.000972077	9.20432e+06	0.00069856	7510632	0.000443405	1.16712e+07	0.000606582	1.02386e+07	0.00074636
Csa_010517056.1	PREDICTED: aldo-keto reductase family 4 member C9-like isoform X2 [Camelina sativa]	0	5	0	299	290083	0.00478826	3807239	0.00058758	4.21993e+06	0.000704811	2.582e+07	0.00335456	7717348	0.000882663	1.38782e+07	0.00222637
Csa_010426464.1	PREDICTED: nascent polypeptide-associated complex subunit alpha-like protein 2 [Camelina sativa]	0	23	4	228	220894	0.00478163	1.80363e+07	0.00365041	1.77977e+07	0.00389822	3.08534e+07	0.00525676	3.0017e+07	0.00450225	2.29393e+07	0.00482592
Csa_010475652.1	PREDICTED: magnesium-chelatase subunit ChlD, chloroplastic [Camelina sativa]	0	42	11	759	728822	0.00473921	1.60106e+08	0.00973404	1.20332e+08	0.00791733	2.30068e+08	0.0117751	152719895	0.00688101	1.31622e+08	0.00831801
Csa_010443380.1	PREDICTED: coatomer subunit beta-1-like [Camelina sativa]	0	22	3	949	909166	0.00472829	2.83874e+07	0.00138035	1.70051e+07	0.00089485	3.51968e+07	0.00144074	3.00234e+07	0.00108191	2.47041e+07	0.00124864
Csa_010413916.1	PREDICTED: ATP synthase subunit gamma, mitochondrial [Camelina sativa]	0	44	8	330	316051	0.00472682	5.91378e+07	0.0082695	5.78912e+07	0.00876066	1.07381e+08	0.0126405	9.17978e+07	0.00951297	75667335	0.0109984
Csa_010444864.1	PREDICTED: sec-independent protein translocase protein TATB, chloroplastic-like [Camelina sativa]	0	19	1	268	256367	0.00472122	2.31203e+07	0.00398096	1.69224e+07	0.0031533	1.71124e+07	0.00248042	3.86544e+07	0.00493244	2.55696e+07	0.00457639
Csa_010482606.1	PREDICTED: sec-independent protein translocase protein TATB, chloroplastic [Camelina sativa]	0	16	0	270	256367	0.00468625	4.31722e+06	0.000737851	2.24916e+06	0.000416002	3.20333e+06	0.00046088	2.51829e+07	0.00318962	1.72766e+07	0.00306922
Csa_010517055.1	PREDICTED: aldo-keto reductase family 4 member C9-like isoform X1 [Camelina sativa]	0	5	0	316	290083	0.00453066	3807239	0.00055597	4.21993e+06	0.000666894	2.582e+07	0.00317409	7717348	0.000835178	1.38782e+07	0.0021066
Csa_010495540.1	PREDICTED: eukaryotic translation initiation factor 3 subunit B-like [Camelina sativa]	0	6	0	371	340439	0.00452889	5.08029e+06	0.000631892	2077873	0.000279694	4966528	0.000520031	32858317	0.00302879	4459840	0.000576606
Csa_010455313.1	PREDICTED: thylakoid lumenal 29 kDa protein, chloroplastic-like [Camelina sativa]	0	36	9	350	320116	0.00451405	6.41706e+07	0.0084605	6.14223e+07	0.00876388	8.98115e+07	0.00996813	6.67561e+07	0.0065226	4.63069e+07	0.00634617
Csa_010484561.1	PREDICTED: zeaxanthin epoxidase, chloroplastic [Camelina sativa]	0	18	7	668	609843	0.00450576	1.36257e+07	0.00094126	7.22412e+06	0.000540066	2.56649e+07	0.0014925	3.10308e+07	0.0015886	2.97181e+07	0.00213392
Csa_010462053.1	PREDICTED: clathrin heavy chain 2 isoform X2 [Camelina sativa]	0	104	0	1703	1.54145e+06	0.00446727	3.35379e+08	0.0090876	1.19141e+08	0.00349369	4.09788e+08	0.00934747	3.08128e+08	0.0061875	2.50639e+08	0.00705941
Csa_010418949.1	PREDICTED: probable ribose-5-phosphate isomerase 3, chloroplastic [Camelina sativa]	0	117	8	275	247948	0.00444995	4.57041e+08	0.076692	4.1728e+08	0.0757763	5.16797e+08	0.0730024	5.87228e+08	0.0730251	4.29635e+08	0.0749377
Csa_010413151.1	PREDICTED: 2-methyl-6-phytyl-1,4-hydroquinone methyltransferase, chloroplastic [Camelina sativa]	0	64	0	336	302234	0.00443947	1.53464e+08	0.0210764	1.87504e+08	0.0278683	2.48991e+08	0.0287868	2.32899e+08	0.0237043	1.60194e+08	0.0228686
Csa_010512759.1	PREDICTED: 2-methyl-6-phytyl-1,4-hydroquinone methyltransferase, chloroplastic-like isoform X3 [Camelina sativa]	0	64	0	336	302234	0.00443947	1.53464e+08	0.0210764	1.87504e+08	0.0278683	2.48991e+08	0.0287868	2.32899e+08	0.0237043	1.60194e+08	0.0228686
Csa_010461980.1	PREDICTED: clathrin heavy chain 2 isoform X1 [Camelina sativa]	0	104	0	1729	1.54145e+06	0.00440009	3.35379e+08	0.00895095	1.19141e+08	0.00344116	4.09788e+08	0.00920691	3.08128e+08	0.00609446	2.50639e+08	0.00695325
Csa_019085592.1	PREDICTED: chaperone protein dnaJ 3 [Camelina sativa]	0	41	0	390	343579	0.00434799	1.17579e+08	0.0139121	7.35573e+07	0.00941888	172027290	0.0171349	174168891	0.0152723	1.35333e+08	0.0166445
Csa_019099598.1	PREDICTED: uncharacterized protein LOC109132442 [Camelina sativa]	0.005	28	1	471	414025	0.00433843	3.19034e+06	0.000312567	7.06697e+06	0.000749291	6.7473e+06	0.000556492	1.42189e+07	0.00103239	6.55165e+06	0.000667212
Csa_010412889.1	PREDICTED: ATP synthase subunit d, mitochondrial-like [Camelina sativa]	0	19	0	102	89645.9	0.00433767	3.94103e+07	0.0178294	3.83483e+07	0.0187752	5.01564e+07	0.0191019	4.00758e+07	0.0134363	3.51505e+07	0.0165297
Csa_010417540.1	PREDICTED: proteasome subunit alpha type-2-B-like isoform X1 [Camelina sativa]	0	28	7	235	206480	0.00433648	76119938	0.0149472	3.92148e+07	0.00833338	1.0476e+08	0.0173172	1.07085e+08	0.0155833	9.6626e+07	0.0197224
Csa_010469924.1	PREDICTED: phosphomethylpyrimidine synthase, chloroplastic [Camelina sativa]	0	53	16	642	547373	0.00420799	8.75608e+07	0.00629366	8.77027e+07	0.00682207	1.11392e+08	0.00674015	7.6183e+07	0.00405809	5.95338e+07	0.00444798
Csa_010428990.1	PREDICTED: protein CHAPERONE-LIKE PROTEIN OF POR1, chloroplastic [Camelina sativa]	0.009	1	1	295	248833	0.00416306	3570928	0.000558582	10023586	0.00169683	9572925	0.00126059		0		0
Csa_010507893.1	PREDICTED: LOW QUALITY PROTEIN: UTP--glucose-1-phosphate uridylyltransferase 2 [Camelina sativa]	0	128	4	456	382259	0.00413732	4.26205e+08	0.0431302	435455182	0.0476889	5.21443e+08	0.0444213	5.73284e+08	0.0429935	3.84462e+08	0.040441
Csa_010466134.1	PREDICTED: DEAD-box ATP-dependent RNA helicase 2-like isoform X3 [Camelina sativa]	0	17	5	409	342600	0.0041342	8794681	0.000992259	3.73707e+07	0.00456296	29863809	0.00283643	19237082	0.00160847	8.38693e+06	0.000983588
Csa_010432309.1	PREDICTED: uncharacterized protein ycf39 [Camelina sativa]	0	80	6	395	328597	0.00410576	1.30289e+08	0.0152208	1.56611e+08	0.0198	1.59734e+08	0.0157091	1.6265e+08	0.0140817	1.26292e+08	0.015336
Csa_010419672.1	PREDICTED: DEAD-box ATP-dependent RNA helicase 56-like isoform X1 [Camelina sativa]	0	40	9	427	354073	0.00409252	75171069	0.00812365	7.48064e+07	0.00874882	6.80387e+07	0.00618982	8.62736e+07	0.00690952	4.909e+07	0.00551441
Csa_010463866.1	PREDICTED: T-complex protein 1 subunit theta [Camelina sativa]	0	34	11	549	455074	0.00409107	9.85893e+07	0.00828678	3.11931e+07	0.00283743	8.83272e+07	0.00624988	1.28565e+08	0.00800845	9.05423e+07	0.00791066
Csa_010492622.1	PREDICTED: TOM1-like protein 2 [Camelina sativa]	0	9	4	425	349390	0.00405741	14518805	0.00157641	5.98266e+06	0.000702981	2.16101e+07	0.00197523	2.97192e+07	0.00239137	1.46902e+07	0.00165795
Csa_010514755.1	PREDICTED: chaperone protein dnaJ 3 [Camelina sativa]	0	41	0	420	343579	0.00403742	1.17579e+08	0.0129184	7.35573e+07	0.0087461	172027290	0.015911	174168891	0.0141814	1.35333e+08	0.0154556
Csa_010465323.1	PREDICTED: pectinesterase/pectinesterase inhibitor 3 [Camelina sativa]	0	115	9	592	480834	0.00400867	3.94333e+08	0.0307376	3.32981e+08	0.028089	4.52121e+08	0.0296676	5.58407e+08	0.0322573	4.24743e+08	0.0344143
Csa_019099549.1	PREDICTED: LOW QUALITY PROTEIN: elongation factor 2 [Camelina sativa]	0	375	5	829	671272	0.00399641	1.66689e+08	0.00927855	1.41873e+08	0.00854643	200935047	0.00941567	2.46625e+08	0.0101737	1.94639e+08	0.0112618
Csa_010460447.1	PREDICTED: T-complex protein 1 subunit epsilon isoform X1 [Camelina sativa]	0	35	13	535	431584	0.00398142	35191003	0.00303533	4.763e+06	0.000444595	3.39116e+07	0.00246232	3.65819e+07	0.00233835	2.56201e+07	0.002297
Csa_010429973.1	PREDICTED: D-glycerate 3-kinase, chloroplastic isoform X1 [Camelina sativa]	0	80	2	482	387365	0.00396643	193652394	0.0185398	1.75369e+08	0.0181696	1.93746e+08	0.0156148	2.13307e+08	0.0151341	1.57064e+08	0.0156301
Csa_010450113.1	PREDICTED: selenium-binding protein 2 isoform X3 [Camelina sativa]	0	46	6	488	390722	0.00395161	1.01037e+08	0.0095541	1.09748e+08	0.011231	7.08629e+07	0.0056409	1.33293e+08	0.0093408	1.15513e+08	0.0113539
Csa_010436440.1	PREDICTED: early nodulin-75-like [Camelina sativa]	0	7	0	541	431449	0.00393603	4.68899e+06	0.000399954	199910	1.84533e-05	1.33661e+07	0.00095975	1.12849e+07	0.000713343	3.03489e+06	0.000269079
Csa_010421724.1	PREDICTED: enoyl-[acyl-carrier-protein] reductase [NADH], chloroplastic [Camelina sativa]	0	28	4	390	309095	0.0039116	1.32895e+08	0.0157243	64335991	0.00823811	6.39115e+07	0.00636596	9.71444e+07	0.00851827	7.50606e+07	0.00923169
Csa_010416519.1	PREDICTED: thioredoxin-like protein CDSP32, chloroplastic [Camelina sativa]	0	90	12	303	234466	0.00381912	2.88476e+08	0.0439335	2.65922e+08	0.0438279	3.31748e+08	0.0425319	3.8461e+08	0.0434087	2.82384e+08	0.0447024
Csa_010457723.1	PREDICTED: calnexin homolog 1-like [Camelina sativa]	0	53	11	531	408284	0.00379485	1.64203e+08	0.0142697	3.88425e+08	0.0365301	1.39143e+08	0.0101793	1.95253e+08	0.0125748	1.26392e+08	0.0114172
Csa_010424009.1	PREDICTED: serine/threonine-protein kinase STN8, chloroplastic [Camelina sativa]	0	3	2	490	376064	0.00378785	6.74301e+07	0.00635018	8.81956e+07	0.00898854	71637352	0.00567928	62734123	0.0043783	6.15641e+07	0.0060265
Csa_010479408.1	PREDICTED: ATP-dependent Clp protease proteolytic subunit-related protein 1, chloroplastic-like [Camelina sativa]	0	36	11	387	296420	0.00378027	9.76078e+07	0.0116386	7.03384e+07	0.00907653	1.06041e+08	0.0106442	7.88136e+07	0.00696447	8.47944e+07	0.0105097
Csa_010488092.1	PREDICTED: L-ascorbate peroxidase 1, cytosolic [Camelina sativa]	0	139	10	250	191174	0.00377412	5.48664e+08	0.101273	3.63285e+08	0.0725681	5.84666e+08	0.0908485	6.04117e+08	0.0826379	438806648	0.0841913
Csa_010491642.1	PREDICTED: B3 domain-containing transcription repressor VAL1 [Camelina sativa]	0.01	4	2	803	613529	0.00377091	2.59634e+07	0.00149202	4.91143e+07	0.00305443	3.0025e+07	0.00145251	41062862	0.00174877	2.15969e+07	0.00129006
Csa_010505756.1	PREDICTED: ferritin-4, chloroplastic [Camelina sativa]	0	8	2	254	193859	0.00376686	15087167	0.00274096	1.79819e+07	0.00353542	1.30058e+07	0.00198908	9.08606e+06	0.00122332	6.41219e+06	0.0012109
Csa_010421935.1	PREDICTED: probable sucrose-phosphate synthase 4 [Camelina sativa]	0.001	5	3	1050	800816	0.00376418	3.05046e+06	0.000134062	2794360	0.000132902	4.04729e+06	0.000149736	3.56093e+06	0.000115977	4405711	0.000201261
Csa_010427311.1	PREDICTED: 2-oxoglutarate dehydrogenase, mitochondrial [Camelina sativa]	0	11	4	1017	774054	0.00375644	5993113	0.000271932	1.16653e+07	0.000572814	9692358	0.000370219	2.06062e+07	0.000692908	1.2985e+07	0.000612429
Csa_010483921.1	PREDICTED: DEAD-box ATP-dependent RNA helicase 7-like [Camelina sativa]	0	5	5	681	516179	0.00374093	1.09122e+07	0.000739425	1.14804e+06	8.41873e-05	1.10657e+06	6.31224e-05	1.15195e+07	0.000578477	5.23644e+06	0.000368827
Csa_010444593.1	PREDICTED: 2-oxoglutarate dehydrogenase, mitochondrial-like isoform X2 [Camelina sativa]	0	2	0	1027	774054	0.00371987	2.54453e+06	0.000114332	5.00534e+06	0.000243389	5488702	0.00020761	3.55784e+06	0.000118472	4468535	0.000208703
Csa_010461603.1	PREDICTED: dihydrolipoyl dehydrogenase 1, mitochondrial [Camelina sativa]	0	172	13	507	380211	0.00370121	3.89405e+08	0.0354423	3.83024e+08	0.0377273	4.55258e+08	0.0348819	5.04413e+08	0.0340233	3.48992e+08	0.0330173
Csa_010422824.1	PREDICTED: probable nucleolar protein 5-2 [Camelina sativa]	0	12	4	554	412988	0.00367921	3.36069e+07	0.00279928	7.31314e+06	0.000659223	1.95033e+07	0.00136756	2.92599e+07	0.00180618	1.88954e+07	0.00163599
Csa_010512491.1	PREDICTED: bifunctional L-3-cyanoalanine synthase/cysteine synthase C1, mitochondrial [Camelina sativa]	0	41	7	369	274427	0.00367052	8.77714e+07	0.0109763	9.90561e+07	0.0134058	52108765	0.00548573	5.72572e+07	0.00530642	4.17842e+07	0.0054315
Csa_010431861.1	PREDICTED: V-type proton ATPase subunit a3 [Camelina sativa]	0	25	6	822	610205	0.00366379	5.3227e+07	0.00298805	5.43856e+07	0.00330408	5.64434e+07	0.00266742	5.92217e+07	0.00246381	3.82565e+07	0.00223238
Csa_010422030.1	PREDICTED: nucleoside diphosphate kinase III, chloroplastic/mitochondrial [Camelina sativa]	0	35	1	238	176658	0.00366338	1.59504e+08	0.0309259	8.21019e+07	0.0172272	151803256	0.0247773	176887821	0.0254167	1.29127e+08	0.0260241
Csa_010463686.1	PREDICTED: tyrosine--tRNA ligase, chloroplastic/mitochondrial [Camelina sativa]	0	9	4	511	372576	0.00359849	1.27951e+07	0.00115545	6.4906e+06	0.000634311	7.9694e+06	0.000605835	20741554	0.00138809	5050989	0.000474121
Csa_010439116.1	PREDICTED: nucleoside diphosphate kinase IV, chloroplastic/mitochondrial-like isoform X1 [Camelina sativa]	0	28	0	245	176658	0.00355871	7.49725e+07	0.0141209	2.55068e+07	0.00519911	55596712	0.00881521	52242885	0.00729221	3.40043e+07	0.00665736
Csa_010445210.1	PREDICTED: 36.4 kDa proline-rich protein-like [Camelina sativa]	0	7	0	608	431449	0.00350229	4.68899e+06	0.00035588	199910	1.64198e-05	1.33661e+07	0.000853988	1.12849e+07	0.000634735	3.03489e+06	0.000239427
Csa_010433099.1	PREDICTED: 60S ribosomal protein L28-2 [Camelina sativa]	0	22	3	143	101063	0.00348806	3.71227e+07	0.0119793	2.50073e+07	0.0087331	3.83124e+07	0.0104077	5.55899e+07	0.0132941	3.66357e+07	0.0122886
Csa_010423118.1	PREDICTED: porphobilinogen deaminase, chloroplastic [Camelina sativa]	0	254	20	384	271125	0.00348469	6.43297e+08	0.0773052	4.92942e+08	0.0641067	7.19081e+08	0.0727439	9.77481e+08	0.0870513	6.21501e+08	0.0776327
Csa_010419938.1	PREDICTED: 50S ribosomal protein L10, chloroplastic [Camelina sativa]	0	51	5	220	154767	0.00347202	1.80189e+08	0.0377949	1.24746e+08	0.0283167	1.74339e+08	0.0307838	1.51327e+08	0.0235229	1.00476e+08	0.0219064
Csa_010427138.1	PREDICTED: aspartyl protease AED3-like [Camelina sativa]	0	33	8	425	298564	0.00346718	9.13126e+07	0.00991447	3.89219e+07	0.00457344	61160177	0.00559023	1.0575e+08	0.00850921	6.33322e+07	0.00714776
Csa_010435225.1	PREDICTED: methionine--tRNA ligase, cytoplasmic-like [Camelina sativa]	0	17	5	799	558022	0.00344692	17428331	0.00100655	6.29532e+06	0.000393468	2.09855e+07	0.00102029	3.36123e+07	0.00143863	2.26167e+07	0.00135774
Csa_010506143.1	PREDICTED: uncharacterized protein LOC104782804 [Camelina sativa]	0	37	10	325	226131	0.00343402	8.91789e+07	0.0126621	3.71957e+07	0.00571541	7.10427e+07	0.00849153	8.54183e+07	0.00898806	5.62213e+07	0.00829758
Csa_010438336.1	PREDICTED: probable 3-hydroxyisobutyrate dehydrogenase-like 1, mitochondrial [Camelina sativa]	0	9	5	338	232075	0.00338874	2.10149e+07	0.00286905	1.55031e+07	0.00229056	2.91938e+07	0.00335524	3.75986e+07	0.00380411	1.84328e+07	0.00261582
Csa_010506469.1	PREDICTED: 3-phosphoshikimate 1-carboxyvinyltransferase, chloroplastic isoform X1 [Camelina sativa]	0	23	9	523	359075	0.00338852	9.05129e+07	0.00798614	3.59043e+07	0.00342833	5.26546e+07	0.00391097	6.4779e+07	0.00423575	4.329e+07	0.00397027
Csa_010451264.1	PREDICTED: proline-rich extensin-like protein EPR1 [Camelina sativa]	0	7	0	634	431449	0.00335866	4.68899e+06	0.000341286	199910	1.57465e-05	1.33661e+07	0.000818967	1.12849e+07	0.000608705	3.03489e+06	0.000229609
Csa_010507301.1	PREDICTED: protein TIC 62, chloroplastic-like [Camelina sativa]	0	36	0	748	506624	0.0033428	1.39571e+07	0.000861037	2.15963e+07	0.00144184	2.72968e+07	0.00141762	1.10472e+07	0.000505068	2.22344e+07	0.0014258
Csa_010433162.1	PREDICTED: GDSL esterase/lipase At4g28780-like [Camelina sativa]	0.006	1	1	367	247387	0.00332689	2.82299e+06	0.000354953	2.06301e+06	0.000280721	1.93825e+06	0.000205161	2.64381e+06	0.000246356	1735277	0.000226797
Csa_010464559.1	PREDICTED: uncharacterized protein LOC104745082 [Camelina sativa]	0	7	2	332	220377	0.00327608	2.49729e+06	0.000347104	968179	0.000145632	2576241	0.000301438	3281386	0.000338	5.49103e+06	0.000793322
Csa_010417499.1	PREDICTED: V-type proton ATPase catalytic subunit A [Camelina sativa]	0	154	19	623	412040	0.00326421	4.33339e+08	0.0320972	3.0018e+08	0.024062	4.68198e+08	0.0291938	5.75309e+08	0.0315799	3.73809e+08	0.0287803
Csa_019092296.1	PREDICTED: chromatin modification-related protein EAF1 B-like [Camelina sativa]	0.049	15	0	1799	1.16676e+06	0.00320093	49214328	0.00126238	36025588	0.00100004	39361100	0.000849935	63211660	0.00120161	41987040	0.00111948
Csa_010426989.1	PREDICTED: aquaporin PIP2-1 [Camelina sativa]	0	25	3	287	186077	0.0031999	5.26033e+07	0.00845783	7.21372e+07	0.0125521	7.89943e+07	0.0106921	1.15952e+08	0.0138164	7.14981e+07	0.0119494
Csa_010452479.1	PREDICTED: anthranilate synthase alpha subunit 1, chloroplastic-like [Camelina sativa]	0	10	3	596	385380	0.00319132	1.80351e+07	0.00139637	1.0122e+07	0.000848122	1.39403e+07	0.000908607	2.15123e+07	0.00123435	1.25216e+07	0.00100773
Csa_010434424.1	PREDICTED: pectin acetylesterase 7-like isoform X1 [Camelina sativa]	0	42	7	391	252329	0.00318506	8.08657e+07	0.00954368	2.53493e+07	0.00323763	9.50044e+07	0.0094388	1.24041e+08	0.0108489	9.64107e+07	0.0118272
Csa_010427081.1	PREDICTED: mitochondrial uncoupling protein 1 [Camelina sativa]	0	13	2	306	197410	0.00318401	2.71841e+07	0.00409941	1.61075e+07	0.00262872	34461757	0.00437488	37205154	0.00415795	3.05788e+07	0.00479327
Csa_010433058.1	PREDICTED: threonine synthase 1, chloroplastic-like [Camelina sativa]	0	40	5	529	340413	0.00317598	6.23956e+07	0.00544285	3.64223e+07	0.00343835	145498161	0.0106844	1.20288e+08	0.00777614	1.08712e+08	0.00985724
Csa_010448644.2	PREDICTED: nucleoside diphosphate kinase IV, chloroplastic/mitochondrial-like [Camelina sativa]	0	28	0	277	176658	0.0031476	7.49725e+07	0.0124896	2.55068e+07	0.00459849	55596712	0.00779685	52242885	0.00644979	3.40043e+07	0.00588828
Csa_010418940.1	PREDICTED: calreticulin-1-like [Camelina sativa]	0	73	3	276	173890	0.00310951	3.03135e+08	0.0506821	1.28583e+08	0.0232655	2.29177e+08	0.0322561	2.52505e+08	0.0312866	1.93843e+08	0.033688
Csa_010505193.2	PREDICTED: fructose-bisphosphate aldolase 6, cytosolic [Camelina sativa]	0	149	9	392	246765	0.00310688	1.02284e+08	0.0120407	7.77779e+07	0.00990851	1.03061e+08	0.0102131	8.78842e+07	0.00766695	7.01634e+07	0.00858535
Csa_010485723.1	PREDICTED: polyribonucleotide nucleotidyltransferase 1, chloroplastic isoform X2 [Camelina sativa]	0	43	13	922	577764	0.00309276	7.37447e+07	0.00369086	6.30499e+07	0.00341501	8.66701e+07	0.00365164	1.22828e+08	0.00455578	9.33356e+07	0.00485568
Csa_010464206.1	PREDICTED: bifunctional 3-dehydroquinate dehydratase/shikimate dehydrogenase, chloroplastic-like [Camelina sativa]	0	17	2	606	378024	0.00307874	8.60136e+08	0.0654972	947980461	0.0781205	1.1823e+09	0.0757885	1466731734	0.0827706	8.11349e+08	0.0642198
Csa_010488603.1	PREDICTED: chromatin modification-related protein EAF1 B isoform X1 [Camelina sativa]	0.049	15	0	1909	1.16676e+06	0.00301648	49214328	0.00118964	36025588	0.000942418	39361100	0.000800961	63211660	0.00113237	41987040	0.00105498
Csa_010417845.1	PREDICTED: calmodulin-5 [Camelina sativa]	0	35	0	181	110608	0.00301602	9.9627e+07	0.0253996	7.83837e+07	0.0216265	1.27632e+08	0.0273925	7.59759e+07	0.0143547	6.41333e+07	0.0169957
Csa_010429133.1	PREDICTED: PLAT domain-containing protein 2 [Camelina sativa]	0	46	4	183	111014	0.00299401	2.35085e+08	0.0592791	2.05842e+08	0.0561722	3.58054e+08	0.0760059	4.10183e+08	0.0766521	3.52212e+08	0.0923182
Csa_010455868.1	PREDICTED: DNA-directed RNA polymerase III subunit 1-like [Camelina sativa]	0.034	2	1	1379	831331	0.00297534	605632	2.02662e-05	92233.2	3.34012e-06	16208	4.56577e-07	10614.5	2.63229e-07	13960.7	4.85599e-07
Csa_010439809.1	PREDICTED: uncharacterized protein LOC104723179 isoform X2 [Camelina sativa]	0	16	7	629	377656	0.00296328	4.01795e+07	0.00294769	3.44405e+07	0.00273437	4.01269e+07	0.00247819	6.42338e+07	0.0034923	4.22437e+07	0.0032214
Csa_010422770.1	PREDICTED: mitochondrial adenine nucleotide transporter ADNT1 [Camelina sativa]	0	9	2	355	210827	0.00293106	1.19304e+08	0.015508	5.13286e+07	0.00722053	134676255	0.0147371	1.47841e+08	0.0142418	1.19776e+08	0.0161836
Csa_010498700.2	PREDICTED: 14-3-3-like protein GF14 epsilon [Camelina sativa]	0	74	14	282	166396	0.00291219	1.02362e+08	0.0167501	1.8786e+07	0.00332678	1.80241e+08	0.0248287	2.34561e+08	0.0284449	1.73874e+08	0.0295746
Csa_010426846.1	PREDICTED: ATP synthase subunit d, mitochondrial [Camelina sativa]	0	75	10	168	98812.7	0.00290289	2.89902e+08	0.0796289	3.34615e+08	0.0994659	4.95955e+08	0.114679	3.67116e+08	0.0747295	4.49295e+08	0.128279
Csa_010449591.1	PREDICTED: uncharacterized protein LOC104731803 [Camelina sativa]	0	7	3	269	157802	0.00289526	16070798	0.00275685	8509278	0.00157972	1.08311e+07	0.00156412	1.19262e+07	0.00151616	8.81366e+06	0.00157159
Csa_010457238.1	PREDICTED: ATP-dependent Clp protease proteolytic subunit 5, chloroplastic [Camelina sativa]	0	39	7	295	171921	0.0028763	1.54293e+08	0.0241352	168060039	0.0284499	1.80132e+08	0.0237203	2.20358e+08	0.025545	1.66496e+08	0.0270717
Csa_010442141.1	PREDICTED: allene oxide synthase, chloroplastic-like [Camelina sativa]	0	28	7	516	298644	0.00285648	7.5153e+07	0.00672086	34689480	0.00335727	9.91064e+07	0.00746109	1.00906e+08	0.00668754	4.67196e+07	0.00434294
Csa_010462335.1	PREDICTED: dihydrolipoyllysine-residue acetyltransferase component 3 of pyruvate dehydrogenase complex, mitochondrial-like [Camelina sativa]	0	23	2	539	309133	0.00283063	3.31381e+07	0.00283705	2.14386e+07	0.00198631	3.62186e+07	0.00261031	5.59217e+07	0.00354805	4.15774e+07	0.00370001
Csa_010460031.1	PREDICTED: uncharacterized protein ycf37 isoform X1 [Camelina sativa]	0	9	3	296	169281	0.00282255	1.14904e+07	0.00179131	1.68704e+07	0.00284624	4.05099e+07	0.00531642	1.0706e+07	0.00123689	2.5189e+07	0.00408181
Csa_010445530.1	PREDICTED: peroxisomal fatty acid beta-oxidation multifunctional protein MFP2-like isoform X2 [Camelina sativa]	0	22	7	725	414506	0.00282176	3.17464e+07	0.00202062	19915172	0.00137178	3.49029e+07	0.00187014	58689264	0.00276834	3.35475e+07	0.00221951
Csa_010433105.1	PREDICTED: profilin-2 [Camelina sativa]	0	19	1	131	74807	0.00281837	1.14547e+07	0.00403496	29751592	0.0113417	23887159	0.00708342	2.17102e+07	0.00566748	1.65184e+07	0.00604827
Csa_010417709.1	PREDICTED: N-alpha-acetyltransferase 15, NatA auxiliary subunit-like [Camelina sativa]	0	6	0	896	508535	0.00280117	1.16714e+07	0.000601094	1.37323e+07	0.000765376	1.326e+07	0.000574893	5.80105e+07	0.0022141	11469343	0.000613994
Csa_010419958.1	PREDICTED: uncharacterized protein LOC104705619 [Camelina sativa]	0	72	14	673	369982	0.00271326	1.29481e+08	0.0088781	6.1001e+07	0.00452648	1.22878e+08	0.00709268	1.52261e+08	0.00773697	9.82227e+07	0.00700053
Csa_010416009.1	PREDICTED: phenylalanine--tRNA ligase beta subunit, cytoplasmic [Camelina sativa]	0	19	6	591	322489	0.00269311	3.36482e+07	0.00262725	2.54349e+07	0.00214922	3.37036e+07	0.00221533	5.63812e+07	0.00326246	3.43607e+07	0.00278874
Csa_010431900.1	PREDICTED: probable cinnamyl alcohol dehydrogenase 9 [Camelina sativa]	0	18	6	381	206847	0.00267948	5.42626e+07	0.00657209	3.77884e+07	0.00495304	6.23866e+07	0.00636086	7.78609e+07	0.00698864	6.36495e+07	0.00801316
Csa_010490023.2	PREDICTED: proline-rich extensin-like protein EPR1 isoform X1 [Camelina sativa]	0	1	0	1324	714104	0.00266195	6.78367e+06	0.000236431	9020148	0.000340223	6.70931e+06	0.000196852	4701243	0.000121429	5825855	0.00021106
Csa_010422577.1	PREDICTED: thylakoid lumenal 16.5 kDa protein, chloroplastic [Camelina sativa]	0	16	5	218	117023	0.00264936	9.81889e+07	0.0207842	3.53418e+07	0.00809601	54821201	0.00976882	8.15697e+07	0.0127959	5.18311e+07	0.0114043
Csa_010419794.1	PREDICTED: elongation factor 1-beta 1 [Camelina sativa]	0	41	0	228	122001	0.00264092	2.01428e+08	0.0407674	1.10577e+08	0.0242197	2.0889e+08	0.0355905	3.73857e+08	0.0560749	209239195	0.0440192
Csa_010509553.1	PREDICTED: ATP synthase subunit d, mitochondrial [Camelina sativa]	0	21	0	168	89645.9	0.00263359	3.94103e+07	0.010825	3.83483e+07	0.0113992	5.01564e+07	0.0115976	4.00758e+07	0.00815776	3.51505e+07	0.0100359
Csa_010460815.1	PREDICTED: elongation factor 1-delta 1 [Camelina sativa]	0	83	3	230	122001	0.00261796	3.27258e+08	0.0656584	1.70311e+08	0.0369788	3.46194e+08	0.0584711	4.93459e+08	0.0733705	3.12742e+08	0.0652218
Csa_010453273.1	PREDICTED: elongation factor 1-beta 1-like [Camelina sativa]	0	41	0	230	122001	0.00261796	2.01428e+08	0.0404129	1.10577e+08	0.0240091	2.0889e+08	0.035281	3.73857e+08	0.0555873	209239195	0.0436364
Csa_010460765.1	PREDICTED: carbamoyl-phosphate synthase large chain, chloroplastic-like [Camelina sativa]	0	60	20	1198	634445	0.00261375	1.62444e+08	0.00625714	1.14621e+08	0.00477801	1.80974e+08	0.00586824	154365256	0.00440647	1.1317e+08	0.00453117
Csa_019097844.1	PREDICTED: ATP synthase subunit O, mitochondrial isoform X1 [Camelina sativa]	0	33	6	245	129654	0.00261185	1.30314e+08	0.0245445	8.91075e+07	0.018163	1.43468e+08	0.0227478	149861111	0.020918	1.02842e+08	0.0201344
Csa_010462282.1	PREDICTED: 26S protease regulatory subunit 7 homolog A [Camelina sativa]	0	30	4	426	224791	0.00260433	4.84075e+07	0.00524362	2.95944e+07	0.00346928	5.16358e+07	0.00470859	69136823	0.00555006	4.69004e+07	0.00528082
Csa_010465949.1	PREDICTED: protein ASPARTIC PROTEASE IN GUARD CELL 1-like [Camelina sativa]	0	16	4	502	263165	0.00258733	6.62104e+07	0.00608626	5.70841e+07	0.00567871	5.15187e+07	0.00398668	48893113	0.00333075	3.26843e+07	0.00312298
Csa_010479286.1	PREDICTED: formin-like protein 20 [Camelina sativa]	0	4	2	480	250965	0.00258047	5.38129e+06	0.000517337	3.38941e+06	0.000352632	4925509	0.000398621	11056219	0.000787705	9.894e+06	0.0009887
Csa_010428962.1	PREDICTED: glutathione S-transferase U20-like [Camelina sativa]	0	86	12	220	114443	0.00256739	2.19369e+08	0.046013	1.30635e+08	0.0296534	2.11612e+08	0.0373653	2.65139e+08	0.0412144	1.6436e+08	0.0358349
Csa_019084950.1	PREDICTED: calmodulin-7 isoform X1 [Camelina sativa]	0	35	0	214	110608	0.00255093	9.9627e+07	0.0214828	7.83837e+07	0.0182915	1.27632e+08	0.0231684	7.59759e+07	0.0121412	6.41333e+07	0.0143749
Csa_010474516.1	PREDICTED: N-alpha-acetyltransferase 15, NatA auxiliary subunit-like [Camelina sativa]	0	6	0	995	508535	0.00252246	1.16714e+07	0.000541287	1.37323e+07	0.000689223	1.326e+07	0.000517692	5.80105e+07	0.0019938	11469343	0.000552904
Csa_010417490.1	PREDICTED: epidermis-specific secreted glycoprotein EP1-like [Camelina sativa]	0	42	7	455	232258	0.00251934	6.31802e+07	0.00640764	8.82135e+07	0.00968193	1.11111e+08	0.00948623	9.97566e+07	0.00749771	7.07799e+07	0.00746161
Csa_010517498.1	PREDICTED: LL-diaminopimelate aminotransferase, chloroplastic isoform X1 [Camelina sativa]	0	71	4	753	383299	0.00251229	1.18322e+08	0.00725102	9.04331e+07	0.00599751	1.23136e+08	0.00635241	1.24065e+08	0.00563446	9.13244e+07	0.00581736
Csa_010503352.1	PREDICTED: malate dehydrogenase, chloroplastic [Camelina sativa]	0	93	10	407	205581	0.00249296	3.1443e+08	0.0356499	2.60068e+08	0.0319103	4.73367e+08	0.0451808	4.90396e+08	0.0412051	3.71378e+08	0.0437679
Csa_010485883.1	PREDICTED: bifunctional L-3-cyanoalanine synthase/cysteine synthase D1-like [Camelina sativa]	0	24	5	409	203899	0.00246048	2.22141e+07	0.0025063	4.08266e+07	0.00498492	3.97226e+07	0.00377281	3.75794e+07	0.00314213	9.07232e+07	0.0106397
Csa_010481497.1	PREDICTED: triose phosphate/phosphate translocator TPT, chloroplastic-like [Camelina sativa]	0	43	2	417	207533	0.00245628	1.45589e+08	0.0161109	1.28696e+08	0.0154123	1.87365e+08	0.0174543	1.3751e+08	0.0112771	1.332e+08	0.0153215
Csa_019088516.1	PREDICTED: uncharacterized protein LOC104724870 [Camelina sativa]	0	11	1	353	175206	0.00244963		0	45488600	0.00643526		0	29856602	0.00289244	1.5318e+07	0.00208142
Csa_010420048.1	PREDICTED: 3-isopropylmalate dehydrogenase 3, chloroplastic isoform X3 [Camelina sativa]	0	14	0	299	148347	0.00244869	38994965	0.00601818	2.40189e+07	0.00401162	1.88081e+07	0.00244356	2.25932e+07	0.00258407	1.3377e+07	0.00214596
Csa_010489007.1	PREDICTED: riboflavin synthase [Camelina sativa]	0	18	4	272	134735	0.00244477	5.3476e+07	0.00907232	3.68998e+07	0.00677475	87670080	0.0125208	84279670	0.0105962	48692569	0.00858673
Csa_010417687.1	PREDICTED: acetylornithine aminotransferase, chloroplastic/mitochondrial [Camelina sativa]	0	22	6	461	226734	0.00242741	6.21986e+07	0.00622598	4.38709e+07	0.00475241	6.09029e+07	0.005132	6.63899e+07	0.00492492	5.22285e+07	0.00543426
Csa_010515327.1	PREDICTED: branched-chain-amino-acid aminotransferase 3, chloroplastic isoform X1 [Camelina sativa]	0	21	8	423	206456	0.00240887	36222837	0.00395157	1.07585e+07	0.00127013	3.98185e+07	0.00365674	5.21353e+07	0.00421492	3.6645e+07	0.00415535
Csa_010434578.1	PREDICTED: 60S ribosomal protein L32-2 [Camelina sativa]	0	55	2	133	64540.5	0.00239501	1.44042e+08	0.0499765	7.73573e+07	0.0290461	1.8066e+08	0.0527667	2.68258e+08	0.0689761	2.27591e+08	0.0820802
Csa_010457853.1	PREDICTED: protein TIC110, chloroplastic [Camelina sativa]	0	121	31	1016	492499	0.00239242	2.62133e+08	0.0119057	2.12528e+08	0.0104462	3.65027e+08	0.0139566	3.89006e+08	0.0130937	3.09518e+08	0.0146126
Csa_010420788.1	PREDICTED: mitochondrial dicarboxylate/tricarboxylate transporter DTC [Camelina sativa]	0	96	8	298	144445	0.00239229	3.39418e+08	0.0525589	2.48549e+08	0.0416518	4.86211e+08	0.0633809	4.52037e+08	0.0518747	3.80814e+08	0.0612958
Csa_010416940.1	PREDICTED: probable ATP synthase 24 kDa subunit, mitochondrial [Camelina sativa]	0	35	5	240	116164	0.00238883	1.26744e+08	0.0243694	9.87202e+07	0.0205416	1.30603e+08	0.0211393	1.5551e+08	0.0221588	1.09323e+08	0.0218492
Csa_010500680.1	PREDICTED: probable plastid-lipid-associated protein 12, chloroplastic [Camelina sativa]	0	5	0	431	208389	0.00238629	9.36382e+06	0.00100254	4.50415e+06	0.000521884	1.27961e+07	0.00115332	1.20909e+07	0.000959357	6.61258e+06	0.000735915
Csa_010511855.1	PREDICTED: ATP sulfurylase 1, chloroplastic-like [Camelina sativa]	0	136	13	469	225004	0.0023678	1.921e+08	0.0189009	2.05884e+08	0.0219224	2.44689e+08	0.0202671	2.45676e+08	0.0179138	1.92119e+08	0.0196486
Csa_010479568.1	PREDICTED: probable plastid-lipid-associated protein 12, chloroplastic isoform X1 [Camelina sativa]	0	5	0	435	208389	0.00236435	9.36382e+06	0.000993326	4.50415e+06	0.000517085	1.27961e+07	0.00114272	1.20909e+07	0.000950535	6.61258e+06	0.000729148
Csa_010418401.1	PREDICTED: uncharacterized protein LOC104703990 [Camelina sativa]	0	11	4	768	367847	0.00236392	1.89228e+07	0.00113698	1.3811e+07	0.000898057	6366178	0.000322009	19107691	0.000850834	16049483	0.00100238
Csa_010454917.1	PREDICTED: eukaryotic translation initiation factor 3 subunit B-like [Camelina sativa]	0	18	0	715	340439	0.00234995	3.61125e+07	0.00233067	1.90517e+07	0.00133066	4.82221e+07	0.00261993	8.4017e+07	0.00401846	44350411	0.00297526
Csa_010455107.1	PREDICTED: eukaryotic translation initiation factor 3 subunit B-like [Camelina sativa]	0	30	2	721	340439	0.0023304	5.25817e+07	0.00336533	27175366	0.00188226	6.78355e+07	0.00365487	1.06433e+08	0.00504822	5.76637e+07	0.0038362
Csa_019090455.1	PREDICTED: DEAD-box ATP-dependent RNA helicase 46-like isoform X4 [Camelina sativa]	0	4	0	622	292563	0.00232143	3.66525e+06	0.00027192	2.45627e+06	0.000197208	2.76184e+06	0.000172487	4.86088e+06	0.000267253	2728353	0.000210399
Csa_010413195.1	PREDICTED: chloroplast stem-loop binding protein of 41 kDa a, chloroplastic [Camelina sativa]	0	166	17	406	190877	0.00232035	7.2147e+08	0.0820013	5.73791e+08	0.0705774	8.82925e+08	0.0844788	9.09157e+08	0.0765792	7.90257e+08	0.0933634
Csa_010423567.1	PREDICTED: 3-ketoacyl-CoA synthase 19-like [Camelina sativa]	0.012	106	1	464	216833	0.0023064	1.70695e+08	0.0169758	6.06101e+08	0.0652327	434951376	0.0364144	4.46888e+08	0.0329366	2.61087e+08	0.0269899
Csa_010415141.1	PREDICTED: glutamate decarboxylase 2-like [Camelina sativa]	0	119	10	495	231249	0.0023057	2.15956e+08	0.0201321	1.75239e+08	0.0176792	2.30553e+08	0.0180932	3.29919e+08	0.0227929	2.02967e+08	0.0196677
Csa_010421436.1	PREDICTED: eukaryotic translation initiation factor 3 subunit B-like isoform X3 [Camelina sativa]	0	18	0	734	340439	0.00228913	3.61125e+07	0.00227033	1.90517e+07	0.00129621	4.82221e+07	0.00255211	8.4017e+07	0.00391444	44350411	0.00289825
Csa_010437183.1	PREDICTED: probable xyloglucan endotransglucosylase/hydrolase protein 7 [Camelina sativa]	0	41	5	294	135252	0.00227052	1.39416e+08	0.0218824	76014731	0.0129119	1.96035e+08	0.0259022	2.04898e+08	0.0238336	1.80321e+08	0.0294193
Csa_010435631.1	PREDICTED: DEAD-box ATP-dependent RNA helicase 14 [Camelina sativa]	0	16	3	636	292563	0.00227033	1.7818e+07	0.0012928	4.98414e+06	0.000391355	1.64114e+07	0.00100239	3.19498e+07	0.00171794	2.02486e+07	0.00152712
Csa_010490986.1	PREDICTED: glutathione S-transferase U17-like [Camelina sativa]	0	7	2	262	120399	0.00226802	480396400	0.0846109	3.89053e+08	0.074156	3.61398e+08	0.0535839	6.27019e+08	0.0818422	433733972	0.0794065
Csa_010492271.1	PREDICTED: DEAD-box ATP-dependent RNA helicase 46 isoform X1 [Camelina sativa]	0	4	0	642	292563	0.00224911	3.66525e+06	0.000263449	2.45627e+06	0.000191064	2.76184e+06	0.000167114	4.86088e+06	0.000258927	2728353	0.000203845
Csa_019087622.1	PREDICTED: uncharacterized protein LOC104728802 [Camelina sativa]	0.02	3	0	164	74149.5	0.00223147		0		0	1.11057e+06	0.000263059	128592	2.68144e-05	77451.7	2.26528e-05
Csa_010461335.1	PREDICTED: annexin D1 [Camelina sativa]	0	216	24	317	142317	0.00221576	749850990	0.109155	3.79605e+08	0.0598013	7.9448e+08	0.0973584	9.08208e+08	0.097977	7.28475e+08	0.110227
Csa_010475731.1	PREDICTED: probable mediator of RNA polymerase II transcription subunit 37b isoform X1 [Camelina sativa]	0	26	0	666	294165	0.00217993	1.72468e+07	0.00119498	3.00307e+06	0.00022518	20495709	0.00119547	4.43452e+07	0.00227704	12802857	0.000922076
Csa_010440778.1	PREDICTED: DNA-binding protein SMUBP-2 [Camelina sativa]	0	3	3	983	429767	0.00215778	1.63038e+07	0.000765355	1.3025e+07	0.000661701	2.43503e+07	0.000962278	4.99126e+06	0.000173642	3.29415e+06	0.00016074
Csa_010420107.1	PREDICTED: DEAD-box ATP-dependent RNA helicase 46-like isoform X3 [Camelina sativa]	0	4	0	674	292563	0.00214233	3.66525e+06	0.000250941	2.45627e+06	0.000181993	2.76184e+06	0.00015918	4.86088e+06	0.000246634	2728353	0.000194167
Csa_010480721.1	PREDICTED: GDSL esterase/lipase At1g29670-like [Camelina sativa]	0	16	0	312	134558	0.00212854	2.92682e+07	0.00432881	2.14461e+07	0.00343268	3.35371e+07	0.00417561	4.41919e+07	0.0048438	3.19521e+07	0.00491224
Csa_010479961.1	PREDICTED: pectinesterase 2-like [Camelina sativa]	0	39	0	594	252352	0.00209675	1.31454e+08	0.0102121	1.41226e+08	0.0118731	1.13224e+08	0.00740462	1.56419e+08	0.00900536	1.10472e+08	0.00892071
Csa_010511052.1	PREDICTED: thionin-like [Camelina sativa]	0	60	2	136	57399.9	0.00208305	1.71447e+08	0.0581726	1.50959e+08	0.0554316	1.87195e+08	0.0534694	3.09512e+08	0.0778281	1.8605e+08	0.0656182
Csa_010505968.1	PREDICTED: 40S ribosomal protein S2-3-like [Camelina sativa]	0	48	5	288	120006	0.00205654	2.07991e+08	0.0333258	1.83273e+08	0.0317793	3.34614e+08	0.0451337	5.92543e+08	0.0703599	1.13554e+08	0.0189123
Csa_010476190.1	PREDICTED: thylakoid lumenal protein TL20.3, chloroplastic isoform X2 [Camelina sativa]	0	31	0	238	98687.7	0.0020465	4.07002e+07	0.00789129	3.26369e+07	0.00684811	4.37578e+07	0.00714214	4.13342e+07	0.00593924	1.89939e+07	0.00382799
Csa_010448090.1	PREDICTED: rhodanese-like domain-containing protein 14, chloroplastic [Camelina sativa]	0	22	5	227	93816.6	0.00203977	3.65405e+07	0.00742808	71702574	0.0157742	3.69657e+07	0.00632591	3.34997e+07	0.00504677	3.64165e+07	0.00769495
Csa_010435219.1	PREDICTED: glycine-rich RNA-binding protein 2, mitochondrial [Camelina sativa]	0	10	3	160	66108.9	0.00203923	3.71414e+07	0.0107119	1.80257e+07	0.00562615	3.685e+07	0.00894679	2.09455e+07	0.00447682	1.74178e+07	0.00522164
Csa_010434836.1	PREDICTED: pentatricopeptide repeat-containing protein At4g16390, chloroplastic [Camelina sativa]	0	3	3	705	288715	0.00202119		0	3.61898e+06	0.000256351		0		0		0
Csa_010459789.1	PREDICTED: pyrophosphate--fructose 6-phosphate 1-phosphotransferase subunit alpha 1 [Camelina sativa]	0	15	3	614	251100	0.00201839	3.73935e+07	0.00281032	6.38344e+06	0.000519188	2.29024e+07	0.00144898	3.02481e+07	0.00168472	2.66529e+07	0.00208214
Csa_010509073.1	PREDICTED: uncharacterized protein LOC104785539 [Camelina sativa]	0	10	1	354	144302	0.00201186	3.04999e+07	0.00397579	2.21482e+07	0.00312446	2.95166e+07	0.00323902	3.1382e+07	0.00303162	2.52044e+07	0.00341513
Csa_010416575.1	PREDICTED: pyrophosphate--fructose 6-phosphate 1-phosphotransferase subunit alpha 2 [Camelina sativa]	0	12	0	617	251100	0.00200858	3.73935e+07	0.00279665	6.38344e+06	0.000516664	1.95315e+07	0.00122971	25716843	0.00142538	2.23989e+07	0.0017413
Csa_010426980.1	PREDICTED: WD repeat-containing protein 20 [Camelina sativa]	0.007	8	1	563	225115	0.00197344	48391460	0.00396633	1.41067e+07	0.00125128	57724716	0.00398294	102320600	0.00621517	76462240	0.00651437
Csa_010501738.1	PREDICTED: granule-bound starch synthase 1, chloroplastic/amyloplastic-like [Camelina sativa]	0	6	1	577	229534	0.00196335	6.35495e+06	0.000508234	2.2742e+06	0.00019683	9.45628e+06	0.000636641	8.44264e+06	0.000500381	6.05891e+06	0.000503677
Csa_010451050.1	PREDICTED: V-type proton ATPase 16 kDa proteolipid subunit [Camelina sativa]	0	20	0	159	63188.2	0.0019614	5.08556e+07	0.0147594	1.20379e+08	0.0378088	5.65539e+07	0.0138171	5.34053e+07	0.0114864	5.63932e+07	0.0170123
Csa_010442240.1	PREDICTED: indole-3-glycerol phosphate synthase, chloroplastic isoform X1 [Camelina sativa]	0	15	4	412	162556	0.0019473	1.22573e+07	0.00137286	1.49582e+07	0.00181309	1.90146e+07	0.00179283	1.81944e+07	0.00151021	1.28855e+07	0.00150016
Csa_019087538.1	PREDICTED: putative ubiquitin-like-specific protease 1B [Camelina sativa]	0.038	4	1	278	109504	0.00194408	23132890	0.00383984	28318234	0.00508698	22447538	0.00313671	17904590	0.00220251	14961355	0.00258143
Csa_010497568.1	PREDICTED: photosynthetic NDH subunit of subcomplex B 1, chloroplastic [Camelina sativa]	0	14	6	458	178460	0.0019231	1.82659e+07	0.00184037	9.88208e+06	0.00107751	3.09452e+07	0.00262469	27444489	0.00204922	2.14121e+07	0.00224247
Csa_010425366.1	PREDICTED: aquaporin TIP1-2-like [Camelina sativa]	0	29	1	253	97381.2	0.00189968	1.12152e+08	0.0204558	1.4391e+08	0.028406	139520006	0.0214223	167858619	0.0226893	62419110	0.011834
Csa_010503939.2	PREDICTED: 30S ribosomal protein 2, chloroplastic-like [Camelina sativa]	0	53	2	274	105175	0.00189448	3.18718e+08	0.0536765	1.8128e+08	0.0330398	2.98839e+08	0.0423679	3.35029e+08	0.0418148	2.76509e+08	0.0484052
Csa_010416452.1	PREDICTED: V-type proton ATPase subunit c4 [Camelina sativa]	0	21	1	165	63188.2	0.00189007	5.08556e+07	0.0142227	1.20379e+08	0.0364339	5.65539e+07	0.0133146	5.34053e+07	0.0110687	5.63932e+07	0.0163937
Csa_010461082.1	PREDICTED: granule-bound starch synthase 1, chloroplastic/amyloplastic [Camelina sativa]	0	5	0	604	229534	0.00187558	5.25175e+06	0.000401232	2.2742e+06	0.000188031	8.3688e+06	0.00053824	7.19473e+06	0.000407357	4.95481e+06	0.000393481
Csa_010499477.1	PREDICTED: GDSL esterase/lipase At1g29670 [Camelina sativa]	0	30	5	363	134558	0.00182949	6.44672e+07	0.00819522	4.6187e+07	0.00635407	8.14298e+07	0.00871419	8.39129e+07	0.00790533	6.37121e+07	0.00841878
Csa_019090077.1	PREDICTED: uncharacterized protein LOC104738075 [Camelina sativa]	0	47	1	675	249192	0.00182204	1.06045e+08	0.00724959	85345245	0.00631414	1.45855e+08	0.00839399	2.02383e+08	0.0102534	1.29455e+08	0.00919915
Csa_019084755.1	PREDICTED: uncharacterized protein LOC104706443 [Camelina sativa]	0	45	0	676	249192	0.00181934	1.05376e+08	0.00719324	85345245	0.0063048	1.45026e+08	0.0083339	2.00385e+08	0.0101372	1.29177e+08	0.00916587
Csa_010421504.1	PREDICTED: T-complex protein 1 subunit gamma-like [Camelina sativa]	0	35	12	555	204443	0.00181805	1.14339e+08	0.0095067	5.12626e+07	0.0046126	9.68173e+07	0.00677657	1.29695e+08	0.00799149	8.96488e+07	0.00774793
Csa_010429527.1	PREDICTED: 3-isopropylmalate dehydrogenase 2, chloroplastic-like isoform X1 [Camelina sativa]	0	27	4	407	148347	0.00179892	5.85848e+07	0.0066423	39910800	0.00489705	4.34465e+07	0.00414677	4.6162e+07	0.00387872	2.95999e+07	0.00348843
Csa_010487842.1	PREDICTED: presequence protease 1, chloroplastic/mitochondrial [Camelina sativa]	0	81	15	1080	393000	0.00179595	1.57988e+08	0.00675038	1.19981e+08	0.00554788	1.73221e+08	0.00623057	2.32498e+08	0.00736195	1.69165e+08	0.00751311
Csa_010420047.1	PREDICTED: 3-isopropylmalate dehydrogenase 3, chloroplastic isoform X2 [Camelina sativa]	0	14	0	408	148347	0.00179451	38994965	0.00441038	2.40189e+07	0.00293989	1.88081e+07	0.00179074	2.25932e+07	0.00189372	1.3377e+07	0.00157265
Csa_010456565.2	PREDICTED: 5-methyltetrahydropteroyltriglutamate--homocysteine methyltransferase 1-like [Camelina sativa]	0	73	0	238	85977.1	0.00178292	1.07183e+08	0.0207816	63453470	0.0133143	1.8852e+08	0.0307702	1.22676e+08	0.017627	8.56818e+07	0.0172681
Csa_010505571.1	PREDICTED: uncharacterized protein LOC104782361 [Camelina sativa]	0	8	0	400	144302	0.00178049	2.96847e+07	0.00342453	2.12138e+07	0.00264848	28052074	0.0027243	29028044	0.00248174	2.34094e+07	0.00280714
Csa_010446199.1	PREDICTED: actin-85C [Camelina sativa]	0	45	0	287	101585	0.00174692	3.51793e+07	0.00565632	2.93488e+07	0.00510678	4.1981e+07	0.00568226	4.82462e+07	0.00574883	2.93937e+07	0.00491254
Csa_010458653.1	PREDICTED: thylakoid lumenal protein TL20.3, chloroplastic-like isoform X2 [Camelina sativa]	0	31	0	282	98687.7	0.00172719	4.07002e+07	0.00666003	3.26369e+07	0.00577961	4.37578e+07	0.00602776	4.13342e+07	0.00501255	1.89939e+07	0.00323071
Csa_010490883.1	PREDICTED: uncharacterized protein At5g03900, chloroplastic [Camelina sativa]	0.001	1	1	523	180879	0.00170692		0		0		0		0		0
Csa_010417054.1	PREDICTED: serine carboxypeptidase-like 9 [Camelina sativa]	0	512	15	440	149978	0.00168229	1.82222e+09	0.191107	1.7341e+09	0.196816	2.45757e+09	0.216972	2.4413e+09	0.189743	1.92541e+09	0.209896
Csa_010429282.1	PREDICTED: polyadenylate-binding protein 4 [Camelina sativa]	0	46	9	662	225190	0.00167887	8.55066e+07	0.00596032	5.00253e+07	0.00377373	1.08723e+08	0.00637989	112733535	0.00582362	9.38321e+07	0.00679873
Csa_019093376.1	PREDICTED: serine carboxypeptidase-like 9 [Camelina sativa]	0	224	2	339	113241	0.00164866	2.58941e+07	0.00352476	1.76549e+07	0.00260078	21327930	0.00244399	11120490	0.00112182	47129694	0.00666851
Csa_019083133.1	PREDICTED: NEP1-interacting protein 2-like [Camelina sativa]	0.04	42	1	150	48894.3	0.00160877	1.95946e+08	0.06028	2.01369e+08	0.0670409	2.06454e+08	0.0534666	3.50083e+08	0.0798138	1.92474e+08	0.061548
Csa_010432222.1	PREDICTED: aconitate hydratase 1 [Camelina sativa]	0	63	7	898	281614	0.00154777	1.18036e+08	0.00606551	5.41661e+07	0.00301224	1.43919e+08	0.00622576	1.1529e+08	0.00439049	1.04406e+08	0.00557679
Csa_010441486.1	PREDICTED: plasminogen activator inhibitor 1 RNA-binding protein [Camelina sativa]	0	128	11	349	105059	0.00148572	2.97885e+08	0.0393868	2.01476e+08	0.0288294	3.56556e+08	0.0396874	4.20864e+08	0.0412396	3.13402e+08	0.0430734
Csa_010421103.1	PREDICTED: protein CHAPERONE-LIKE PROTEIN OF POR1, chloroplastic [Camelina sativa]	0	2	1	258	75376.9	0.00144193	4781114	0.000855141	2.94494e+06	0.000570026	5563259	0.000837644		0	4648556	0.000864236
Csa_019101321.1	PREDICTED: putative uncharacterized protein DDB_G0291608 isoform X1 [Camelina sativa]	0.019	1	0	818	238495	0.00143897	994240	5.60875e-05	2667904	0.000162875		0		0		0
Csa_010484056.1	PREDICTED: nucleoside diphosphate kinase II, chloroplastic isoform X1 [Camelina sativa]	0	46	5	238	69315.7	0.00143741	1.08985e+08	0.021131	5.46502e+07	0.0114671	1.04163e+08	0.0170014	1.41062e+08	0.0202689	8.3354e+07	0.016799
Csa_010460714.1	PREDICTED: mediator of RNA polymerase II transcription subunit 15 isoform X1 [Camelina sativa]	0	4	0	843	238495	0.0013963	994240	5.44241e-05	2667904	0.000158045	1.63469e+06	7.53283e-05	2.54197e+06	0.000103119	2588674	0.000147294
Csa_010413764.1	PREDICTED: probable serine/threonine-protein kinase yakA isoform X2 [Camelina sativa]	0.019	1	0	843	238495	0.0013963	994240	5.44241e-05	2667904	0.000158045		0		0		0
Csa_010517038.1	PREDICTED: uncharacterized protein At2g37660, chloroplastic [Camelina sativa]	0	110	12	330	93152.1	0.00139317	3.43498e+08	0.0480329	2.95704e+08	0.0447488	4.25894e+08	0.0501345	3.27317e+08	0.0339197	2.88525e+08	0.0419376
Csa_010501374.1	PREDICTED: UDP-D-apiose/UDP-D-xylose synthase 2-like [Camelina sativa]	0	53	2	325	90576.4	0.00137549	1.19346e+08	0.0169454	1.06243e+08	0.0163251	1.85418e+08	0.0221624	1.36932e+08	0.0144085	9.65465e+07	0.0142491
Csa_010419814.1	PREDICTED: tubulin beta-6 chain-like [Camelina sativa]	0	136	6	449	125126	0.00137539	8.43849e+07	0.00867255	41481444	0.00461366	112054524	0.00969467	1.48939e+08	0.0113438	132763181	0.0141829
Csa_010413763.1	PREDICTED: alpha-protein kinase 1 isoform X1 [Camelina sativa]	0.019	1	0	864	238495	0.00136236	994240	5.31013e-05	2667904	0.000154204		0		0		0
Csa_010501381.1	PREDICTED: violaxanthin de-epoxidase, chloroplastic-like [Camelina sativa]	0	9	0	231	63100.5	0.00134818	2.03743e+07	0.00407004	30427636	0.00657801	26268577	0.00441748	3.41931e+07	0.00506203	23758058	0.00493325
Csa_010504198.1	PREDICTED: fructose-1,6-bisphosphatase, chloroplastic [Camelina sativa]	0	85	7	416	113562	0.0013473	2.40153e+08	0.0266393	3.21955e+08	0.0386492	305300580	0.0285091	3.21473e+08	0.0264271	2.51371e+08	0.0289838
Csa_010419919.1	PREDICTED: uncharacterized protein LOC104705593 [Camelina sativa]	0	10	5	438	118479	0.00133504	3.71134e+07	0.00391008	2.0082e+07	0.00228966	3.10225e+07	0.00275139	3.53179e+07	0.00275752	28073191	0.00307434
Csa_019094469.1	PREDICTED: RNA polymerase II degradation factor 1 [Camelina sativa]	0	4	0	902	238495	0.00130497	994240	5.08643e-05	2667904	0.000147707	1.63469e+06	7.04011e-05	2.54197e+06	9.63744e-05	2588674	0.000137659
Csa_010434236.1	PREDICTED: protein BUD31 homolog 1 [Camelina sativa]	0.001	2	2	145	38142.6	0.00129828	2.13047e+06	0.000678009		0		0	1.13717e+06	0.000268197	786178	0.000260068
Csa_010435596.1	PREDICTED: glutamine synthetase cytosolic isozyme 1-1-like isoform X2 [Camelina sativa]	0	2	0	276	72254.7	0.00129206	20056716	0.00335335	19404160	0.00351095	86486312	0.0121727	24265440	0.00300661		0
Csa_010516502.1	PREDICTED: serine/threonine-protein phosphatase PP2A-3 catalytic subunit isoform X2 [Camelina sativa]	0	4	0	300	78375.6	0.0012894	4827483	0.000742553	1.81787e+07	0.00302608	1.10985e+07	0.00143712	1.31826e+07	0.00150271	7.01157e+06	0.00112106
Csa_010490810.1	PREDICTED: cell division control protein 48 homolog E [Camelina sativa]	0	125	7	811	210210	0.00127926	3.06675e+08	0.0174496	1.44071e+08	0.00887146	2.40426e+08	0.0115162	3.29267e+08	0.0138843	2.16104e+08	0.0127813
Csa_010432358.1	PREDICTED: L-ascorbate peroxidase 3, peroxisomal-like [Camelina sativa]	0	31	3	287	73820.4	0.00126947	2.01366e+08	0.0323767	2.14775e+08	0.0373715	2.22828e+08	0.0301604	3.13461e+08	0.0373508	2.54538e+08	0.0425406
Csa_010448660.1	PREDICTED: tryptophan synthase beta chain 1, chloroplastic [Camelina sativa]	0	6	1	475	121148	0.00125878	11154168	0.00108361	10301396	0.00108303	11466890	0.000937782	1.69944e+07	0.00122352	1.258e+07	0.00127034
Csa_010453325.1	PREDICTED: protein RETICULATA-RELATED 4, chloroplastic [Camelina sativa]	0	24	4	385	96722.5	0.00123992	6.62835e+07	0.00794462	4.51049e+07	0.00585061	84288333	0.00850465	8.76272e+07	0.00778352	7.47248e+07	0.00930975
Csa_010460101.1	PREDICTED: probable phosphoglucomutase, cytoplasmic 1 [Camelina sativa]	0	126	14	583	145989	0.00123589	3.26703e+08	0.0258591	2.64226e+08	0.0226331	4.21998e+08	0.0281185	4.49591e+08	0.0263723	3.40072e+08	0.0279793
Csa_010427757.1	PREDICTED: serine/threonine-protein phosphatase PP2A-3 catalytic subunit [Camelina sativa]	0	4	0	313	78375.6	0.00123584	4827483	0.000711712	1.81787e+07	0.00290039	1.10985e+07	0.00137743	1.31826e+07	0.0014403	7.01157e+06	0.0010745
Csa_010443024.1	PREDICTED: NAD(P)H dehydrogenase (quinone) FQR1 [Camelina sativa]	0	21	3	204	51038.6	0.0012348	1.39692e+08	0.0315987	104864920	0.0256707	87690675	0.0166983	7.02226e+07	0.0117718	68295304	0.0160581
Csa_010443852.1	PREDICTED: probable pyridoxal 5'-phosphate synthase subunit PDX2 [Camelina sativa]	0	7	3	255	63668.2	0.00123228	7.95232e+06	0.00143907	1.54963e+07	0.00303477	34260758	0.00521923	17247443	0.00231304	1.45484e+07	0.00273659
Csa_010461878.1	PREDICTED: thioredoxin X, chloroplastic-like [Camelina sativa]	0	7	1	183	43063.8	0.00116142	31995836	0.00806809	31580031	0.00861787	33320312	0.00707307	2.16124e+07	0.00403878	2.87551e+07	0.00753698
Csa_010507859.1	PREDICTED: glutathione S-transferase F8, chloroplastic [Camelina sativa]	0	34	5	217	50730.2	0.00115381	3.11084e+07	0.00661524	4.94193e+07	0.011373	8.9046e+07	0.0159406	6.87162e+07	0.0108292	4.35064e+07	0.00961672
Csa_010414385.1	PREDICTED: glutathione S-transferase U5-like [Camelina sativa]	0	2	1	224	51579.8	0.00113647	1.72826e+06	0.000356031	1.80213e+06	0.000401768	2.27897e+06	0.000395222	3.4606e+06	0.000528326	2.02077e+06	0.000432717
Csa_019083578.1	PREDICTED: coatomer subunit beta'-1 [Camelina sativa]	0	19	2	929	212317	0.00112797	4.9251e+06	0.00024464	563209	3.02756e-05	4.50939e+06	0.000188561	6.98871e+06	0.000257264	4408516	0.00022762
Csa_010443548.1	PREDICTED: 26S protease regulatory subunit 6B homolog [Camelina sativa]	0	39	12	408	93015.1	0.00112517	5.68139e+07	0.00642573	3.20931e+07	0.00392817	9.23109e+07	0.00878906	8.50008e+07	0.00712461	6.50629e+07	0.00764905
Csa_010426930.1	PREDICTED: pyruvate kinase 1, cytosolic [Camelina sativa]	0	81	5	527	119152	0.00111588	1.56389e+08	0.0136938	1.2642e+08	0.0119797	167764750	0.0123663	1.86207e+08	0.0120833	1.7257e+08	0.0157068
Csa_010492280.1	PREDICTED: ADP-ribosylation factor isoform X1 [Camelina sativa]	0	66	6	183	41111	0.00110875	1.03718e+08	0.0261535	5.0658e+07	0.0138241	1.33806e+08	0.0284036	1.6752e+08	0.0313049	1.21076e+08	0.0317351
Csa_010427034.2	PREDICTED: actin-1-like [Camelina sativa]	0	79	4	294	65486.2	0.00109933	3.8063e+07	0.00597426	2.32037e+07	0.00394138	5.14914e+07	0.00680358	5.85609e+07	0.00681174	3.9499e+07	0.00644426
Csa_010426371.1	PREDICTED: glutamate-1-semialdehyde 2,1-aminomutase 2, chloroplastic [Camelina sativa]	0	296	7	473	105088	0.00109652	4.62349e+08	0.0451062	3.66184e+08	0.0386613	4.86038e+08	0.0399171	6.03043e+08	0.0435999	3.65015e+08	0.0370155
Csa_019083396.1	PREDICTED: prolyl endopeptidase [Camelina sativa]	0	11	5	808	176852	0.00108025	3.76985e+07	0.00215299	35909406	0.0022194	4.48084e+07	0.00215426	52620347	0.0022271	53140325	0.00315462
Csa_010477031.1	PREDICTED: 2-isopropylmalate synthase 1, chloroplastic [Camelina sativa]	0	34	5	626	136371	0.00107516	6.57781e+07	0.00484881	1.16259e+07	0.000927449	3.12043e+07	0.00193638	2.98238e+07	0.00162925	2.74634e+07	0.00210433
Csa_010435595.1	PREDICTED: glutamine synthetase cytosolic isozyme 1-1-like isoform X1 [Camelina sativa]	0	2	0	356	72254.7	0.00100171	20056716	0.00259979	19404160	0.00272197	86486312	0.00943729	24265440	0.00233097		0
Csa_010517479.1	PREDICTED: uroporphyrinogen decarboxylase 2, chloroplastic-like [Camelina sativa]	0	104	11	395	79943.1	0.000998874	2.52267e+08	0.0294708	2.88929e+08	0.0365285	2.97771e+08	0.0292843	2.07601e+08	0.0179734	1.6128e+08	0.0195848
Csa_010433943.1	PREDICTED: glutamate--cysteine ligase, chloroplastic [Camelina sativa]	0	19	6	529	105919	0.0009882	4.76503e+07	0.0041566	5.80201e+07	0.00547723	6.83813e+07	0.00502148	56013652	0.00362106	4.73426e+07	0.0042927
Csa_010428078.1	PREDICTED: patellin-1 [Camelina sativa]	0	14	6	575	114877	0.000986035	6.72303e+07	0.00539542	4.34161e+07	0.00377069	60221281	0.00406848	95036653	0.00565225	7.10407e+07	0.00592616
Csa_010474414.1	PREDICTED: UDP-glycosyltransferase 84A1-like [Camelina sativa]	0.043	3	1	414	82184.2	0.000979748	27183250	0.00302991	1.27023e+07	0.00153222	56392870	0.00529144	29581018	0.00244349	25107278	0.00290893
Csa_010423047.1	PREDICTED: pyruvate kinase, cytosolic isozyme [Camelina sativa]	0	33	4	510	100997	0.000977381	1.40243e+08	0.0126893	1.08585e+08	0.0106326	1.65871e+08	0.0126343	1.41352e+08	0.00947829	1.34871e+08	0.0126848
Csa_010472499.1	PREDICTED: protein TIC 55, chloroplastic-like [Camelina sativa]	0	9	0	538	105722	0.000969862	2.88307e+07	0.00247287	2.53773e+07	0.0023556	2.88611e+07	0.00208392	2.87184e+07	0.00182547	2.49904e+07	0.00222805
Csa_010429477.1	PREDICTED: protein TIC 55, chloroplastic-like [Camelina sativa]	0	7	0	539	105722	0.000968063	1.83218e+07	0.00156858	1.79441e+07	0.00166253	1.61513e+07	0.00116404	1.84073e+07	0.00116788	1.3486e+07	0.00120013
Csa_010472501.1	PREDICTED: protein TIC 55, chloroplastic [Camelina sativa]	0	9	0	542	105722	0.000962704	2.88307e+07	0.00245462	2.53773e+07	0.00233821	2.88611e+07	0.00206854	2.87184e+07	0.001812	2.49904e+07	0.00221161
Csa_010472125.1	PREDICTED: uncharacterized protein LOC104751794 isoform X2 [Camelina sativa]	0	4	0	314	58343.5	0.000917043	21831057	0.00320829	2.1059e+07	0.00334923	1.7112e+07	0.00211699	2.23904e+07	0.00243854	8.78419e+06	0.00134186
Csa_010508399.1	PREDICTED: endochitinase At2g43590-like [Camelina sativa]	0	40	4	266	47849.6	0.000887818	3.42992e+07	0.00595019	1.28079e+07	0.00240456	4.18165e+07	0.00610683	3.54581e+07	0.0045586	1.68534e+07	0.00303907
Csa_010466720.1	PREDICTED: protein transport protein SEC23 [Camelina sativa]	0	6	2	770	136426	0.000874448	3.70688e+06	0.00022215	4.43875e+06	0.000287878	2.81722e+06	0.000142128	4.18321e+06	0.000185788	2.70945e+06	0.000168781
Csa_010414628.1	PREDICTED: pyruvate dehydrogenase E1 component subunit alpha-1, mitochondrial [Camelina sativa]	0	29	6	389	68625.1	0.000870684	5.38944e+07	0.00639326	2.50495e+07	0.00321579	7.23241e+07	0.00722243	7.34242e+07	0.00645488	6.61805e+07	0.00816045
Csa_010416884.1	PREDICTED: uncharacterized protein LOC104702680 isoform X1 [Camelina sativa]	0	7	1	331	58343.5	0.000869944	26922347	0.0037533	2.36826e+07	0.00357305	2.14116e+07	0.00251288	29716395	0.0030702	12799107	0.00185475
Csa_010415138.2	PREDICTED: cytosolic isocitrate dehydrogenase [NADP] isoform X2 [Camelina sativa]	0	117	4	412	72146.8	0.000864265	1.20821e+09	0.135323	1.17112e+09	0.141952	1.87055e+09	0.176369	1.94069e+09	0.161086	1.9508e+09	0.227116
Csa_010415479.1	PREDICTED: alpha-xylosidase 1 [Camelina sativa]	0	29	9	919	160907	0.000864143	3.68388e+07	0.00184977	1.87865e+07	0.00102087	5.97119e+07	0.00252404	5.51431e+07	0.00205198	3.90969e+07	0.00204061
Csa_010460148.1	PREDICTED: quinone oxidoreductase-like protein At1g23740, chloroplastic [Camelina sativa]	0	87	17	389	67768.5	0.000859815	1.55924e+08	0.0184966	1.56872e+08	0.0201388	2.04622e+08	0.020434	2.63656e+08	0.0231786	1.51266e+08	0.018652
Csa_019093352.1	PREDICTED: betaine aldehyde dehydrogenase 1, chloroplastic-like [Camelina sativa]	0.011	1	1	287	49770.8	0.000855893	704188	0.000113223		0		0	6009966	0.000716124	4.58857e+06	0.000766884
Csa_010450905.1	PREDICTED: ubiquitin receptor RAD23d isoform X1 [Camelina sativa]	0	20	3	381	65127.4	0.000843656	5.44855e+07	0.00659909	4.05976e+07	0.00532126	65344422	0.00666244	8.21048e+07	0.00736956	6.32155e+07	0.00795852
Csa_010441734.1	PREDICTED: ATP-dependent Clp protease proteolytic subunit 4, chloroplastic [Camelina sativa]	0	76	9	293	49146.2	0.000827844	1.81988e+08	0.0286618	1.75929e+08	0.0299853	2.57019e+08	0.0340759	2.68705e+08	0.0313622	1.84147e+08	0.0301461
Csa_010441927.1	PREDICTED: alcohol dehydrogenase class-3 [Camelina sativa]	0	120	11	379	63125.5	0.000822039	3.7875e+08	0.0461149	3.28188e+08	0.0432436	5.17653e+08	0.0530578	468128022	0.04224	3.55307e+08	0.0449675
Csa_019092187.1	PREDICTED: rRNA biogenesis protein RRP5-like [Camelina sativa]	0.006	1	0	1237	205026	0.000818022		0		0		0		0	1.36217e+06	5.28198e-05
Csa_010473008.1	PREDICTED: heat shock 70 kDa protein 15-like [Camelina sativa]	0	66	5	830	136981	0.000814535	1.16878e+07	0.000649805	1.74794e+06	0.000105169	5.75466e+06	0.000269334	6.6233e+06	0.000272894	5.54397e+06	0.000320388
Csa_010458860.1	PREDICTED: nodulin-related protein 1-like [Camelina sativa]	0	82	4	159	25792.3	0.000800608	2.79082e+08	0.0809957	212504791	0.0667437	3.69251e+08	0.090214	3.90976e+08	0.0840912	361570886	0.109076
Csa_010433522.1	PREDICTED: arginine--tRNA ligase, chloroplastic/mitochondrial isoform X1 [Camelina sativa]	0	26	7	654	105775	0.000798235	4.13864e+07	0.00292017	2.03607e+07	0.00155472	4.31949e+07	0.00256569	6.40439e+07	0.00334887	4.09753e+07	0.00300523
Csa_010441599.1	PREDICTED: 3-oxoacyl-[acyl-carrier-protein] synthase I, chloroplastic [Camelina sativa]	0	65	13	472	74908.4	0.000783277	163334643	0.0159685	1.16681e+08	0.0123452	1.75076e+08	0.014409	1.7676e+08	0.0128068	1.6279e+08	0.0165432
Csa_010418409.1	PREDICTED: puromycin-sensitive aminopeptidase-like [Camelina sativa]	0	23	2	975	152768	0.000773313	4.91095e+07	0.00232428	2.49649e+07	0.00127869	3.75755e+07	0.0014971	5.05166e+07	0.00177185	35347976	0.00173898
Csa_010465901.1	PREDICTED: T-complex protein 1 subunit delta [Camelina sativa]	0	38	10	536	82914.1	0.000763467	1.08996e+08	0.00938367	3.87761e+07	0.00361275	7.635e+07	0.00553343	7.70689e+07	0.00491714	6.59524e+07	0.00590201
Csa_010423894.1	PREDICTED: uncharacterized protein LOC104708932 [Camelina sativa]	0	65	5	140	21053	0.000742187	8.94232e+07	0.0294747	1.44451e+08	0.0515265	1.37355e+08	0.0381123	1.44997e+08	0.0354184	1.25898e+08	0.0431344
Csa_001289902.1	probable aquaporin PIP1-4 [Camelina sativa]	0	89	5	287	42890.5	0.000737575	2.35963e+08	0.0379394	1.1647e+08	0.0202661	1.43438e+08	0.0194148	2.17306e+08	0.0258933	1.87478e+08	0.0313331
Csa_010418520.2	PREDICTED: 30S ribosomal protein S6 alpha, chloroplastic, partial [Camelina sativa]	0	11	2	228	33808.4	0.00073184	1.89447e+07	0.00383425	2859007	0.000626208	2.99808e+07	0.00510808	1.91777e+07	0.00287647	1.62568e+07	0.00342007
Csa_010417229.1	PREDICTED: pathogenesis-related protein R major form-like [Camelina sativa]	0	19	2	232	34253.3	0.000728688	3.6692e+07	0.00729813	1.0218e+08	0.0219947	5.69699e+07	0.0095391	61444275	0.00905715	1.9639e+07	0.00406036
Csa_010425190.1	PREDICTED: heat shock protein 90-5, chloroplastic [Camelina sativa]	0	157	21	783	115416	0.000727497	4.35939e+08	0.0256916	2.77803e+08	0.0177179	486371372	0.0241299	5.36006e+08	0.0234103	3.90298e+08	0.0239094
Csa_010415872.1	PREDICTED: peroxidase 12-like [Camelina sativa]	0	13	4	359	52202.2	0.000717664	2.09135e+07	0.00268819	1.79525e+07	0.00249729	2.24615e+07	0.00243049	2.31421e+07	0.00220448	1.78862e+07	0.00238978
Csa_010429549.1	PREDICTED: cystathionine gamma-synthase 1, chloroplastic [Camelina sativa]	0	15	4	563	81497	0.00071443	2.59354e+07	0.00212575	2.11889e+07	0.00187949	3.01364e+07	0.00207937	47775965	0.00290201	31231708	0.00266086
Csa_010414035.1	PREDICTED: 40S ribosomal protein S12-2-like [Camelina sativa]	0	259	2	143	20251.2	0.000698942	305298087	0.0985181	3.02719e+08	0.105716	4.25735e+08	0.115652	4.45822e+08	0.106616	2.86672e+08	0.0961577
Csa_010458094.1	PREDICTED: violaxanthin de-epoxidase, chloroplastic [Camelina sativa]	0	13	1	461	64335.1	0.000688769	2.57695e+07	0.00257949	3.45117e+07	0.00373856	3.13315e+07	0.00264016	3.91033e+07	0.00290075	3.0752e+07	0.00319968
Csa_010414716.1	PREDICTED: thionin-like [Camelina sativa]	0	191	2	133	18545.5	0.000688199	8.48534e+08	0.294405	4.80263e+08	0.180329	1.48823e+09	0.434677	1.68752e+09	0.433905	1.35668e+09	0.489282
Csa_010433357.1	PREDICTED: proton pump-interactor 1 isoform X1 [Camelina sativa]	0	11	1	617	82558.9	0.000660397	2.02495e+07	0.00151446	6.48721e+06	0.000525063	3.69314e+07	0.0023252	2.0263e+07	0.0011231	3.56155e+07	0.00276878
Csa_019086331.1	PREDICTED: uncharacterized protein LOC109126890 [Camelina sativa]	0.027	4	2	674	89656.1	0.000656518	1.31676e+07	0.000901517	2.01168e+07	0.00149052	2.59686e+07	0.00149671	15889892	0.00080623	1.54875e+07	0.00110219
Csa_010451256.1	PREDICTED: thioredoxin F1, chloroplastic-like [Camelina sativa]	0	47	0	93	12236.6	0.00064939	8.73741e+07	0.0433539	7.12297e+07	0.0382487	1.22103e+08	0.0510029	1.00311e+08	0.0368862	9.22323e+07	0.0475701
Csa_010434526.1	PREDICTED: magnesium-chelatase subunit ChlI-1, chloroplastic-like [Camelina sativa]	0	181	13	430	56349.8	0.000646772	6.20488e+08	0.0665876	4.59874e+08	0.0534083	785125281	0.0709284	7.58128e+08	0.0602937	643097402	0.0717368
Csa_010458722.1	PREDICTED: V-type proton ATPase subunit C [Camelina sativa]	0	26	9	375	47352.9	0.000623222	55029115	0.00677157	28024005	0.00373196	5.97861e+07	0.00619325	1.05956e+08	0.00966259	5.76871e+07	0.00737873
Csa_010516168.1	PREDICTED: sedoheptulose-1,7-bisphosphatase, chloroplastic-like [Camelina sativa]	0	460	21	472	59574.3	0.000622937	1.30376e+09	0.127463	1.42836e+09	0.151125	1.57696e+09	0.129787	1.82165e+09	0.131984	1.22563e+09	0.124552
Csa_010474098.1	PREDICTED: uncharacterized protein LOC104753562 [Camelina sativa]	0.022	11	0	467	58910.3	0.000622589	1.24743e+08	0.0123261	3.82047e+07	0.00408543	136738978	0.0113743	135130820	0.00989545	64961395	0.00667225
Csa_010415513.1	PREDICTED: 26S proteasome non-ATPase regulatory subunit 2 homolog A-like isoform X1 [Camelina sativa]	0	35	5	891	109371	0.000605829	1.03035e+08	0.00533622	4.27415e+07	0.00239558	1.08512e+08	0.00473097	8.54933e+07	0.00328135	7.25314e+07	0.00390465
Csa_019092683.1	PREDICTED: L-ascorbate peroxidase 3, peroxisomal-like isoform X1 [Camelina sativa]	0	6	0	306	37527.3	0.000605275	1.56406e+08	0.0235863	1.79513e+08	0.0292963	1.70711e+08	0.0216715	2.31386e+08	0.0258591	2.05693e+08	0.0322427
Csa_010434229.1	PREDICTED: dolichyl-diphosphooligosaccharide--protein glycosyltransferase subunit 2 [Camelina sativa]	0	16	8	692	84576.7	0.000603214	1.57486e+07	0.00105018	5.91914e+06	0.00042716	1.46217e+07	0.00082081	1.64674e+07	0.000813801	1.226e+07	0.000849802
Csa_010459995.1	PREDICTED: phospho-2-dehydro-3-deoxyheptonate aldolase 1, chloroplastic [Camelina sativa]	0	23	7	521	63585	0.000602343	1.04835e+07	0.000928533	10757159	0.00103109	21117878	0.00157457	31357513	0.00205827	1.68708e+07	0.00155322
Csa_010464067.1	PREDICTED: acyl-CoA-binding domain-containing protein 4 isoform X1 [Camelina sativa]	0	6	2	669	79969.2	0.000589961	4.92368e+06	0.000339619	4705072	0.000351219	13969489	0.000811156	24488507	0.0012518	1.11437e+07	0.000798981
Csa_019095330.1	PREDICTED: uncharacterized protein LOC109130252 [Camelina sativa]	0.001	10	0	385	45849.4	0.00058776	80949582	0.00970246	61834031	0.00802057	95424885	0.00962833	119877489	0.0106482	7.90884e+07	0.0098534
Csa_010506561.1	PREDICTED: remorin [Camelina sativa]	0	16	7	191	22461.2	0.000580399	5.84058e+07	0.0141108	3.92727e+07	0.0102682	3.80969e+07	0.00774829	4.11221e+07	0.00736276	3.68255e+07	0.00924804
Csa_010459017.1	PREDICTED: 10 kDa chaperonin, mitochondrial-like [Camelina sativa]	0	23	1	98	11333.2	0.000570758	9.77306e+07	0.0460185	5.24217e+07	0.0267131	1.1216e+08	0.0444591	2.24982e+08	0.0785091	1.17814e+08	0.0576642
Csa_019101832.1	PREDICTED: 10 kDa chaperonin, mitochondrial-like, partial [Camelina sativa]	0	17	0	101	11333.2	0.000553805	9.25444e+07	0.0422821	50295034	0.0248681	9.82733e+07	0.0377976	196540227	0.066547	1.0493e+08	0.0498324
Csa_010439646.1	PREDICTED: 60S ribosomal protein L13a-4 [Camelina sativa]	0	225	3	206	23109.3	0.000553664	7.79214e+07	0.0174549	5.2724e+07	0.0127814	7.71111e+07	0.0145412	8.31311e+07	0.0138005	6.15269e+07	0.0143262
Csa_010452650.2	PREDICTED: aspartyl protease AED3-like [Camelina sativa]	0	71	11	456	50866.7	0.000550548	3.03058e+08	0.0306682	9.87415e+07	0.0108137	3.90248e+08	0.033245	4.95251e+08	0.0371414	3.83439e+08	0.0403334
Csa_010432550.1	PREDICTED: phospho-2-dehydro-3-deoxyheptonate aldolase 2, chloroplastic [Camelina sativa]	0	21	6	508	54496.9	0.000529462	6.71462e+07	0.00609938	5.41081e+07	0.00531909	78688751	0.00601726	94524149	0.00636322	7.76463e+07	0.00733146
Csa_019102012.1	PREDICTED: 10 kDa chaperonin, mitochondrial-like isoform X2 [Camelina sativa]	0	18	0	106	11333.2	0.000527682	9.25444e+07	0.0402877	50295034	0.0236951	9.90211e+07	0.0362887	2.01109e+08	0.0648821	1.06414e+08	0.0481532
Csa_010452284.1	PREDICTED: uncharacterized protein LOC104734411 [Camelina sativa]	0	4	2	344	36571.3	0.000524697	20454400	0.00274382	28390764	0.00412152	24556174	0.00277301	10029622	0.000997067	21810776	0.00304121
Csa_010428593.1	PREDICTED: uncharacterized protein LOC104713218 isoform X1 [Camelina sativa]	0	7	0	200	21198.2	0.000523114	1.80361e+07	0.00416141	4.4404e+06	0.00110874	2.15066e+07	0.00417727	6.23433e+06	0.001066	5.79423e+06	0.00138963
Csa_010418276.1	PREDICTED: uncharacterized protein LOC104703887 [Camelina sativa]	0	90	9	238	25178.2	0.000522126	3.37761e+08	0.0654879	2.36174e+08	0.0495558	3.93396e+08	0.06421	4.98985e+08	0.0716982	3.73695e+08	0.0753137
Csa_010429374.1	PREDICTED: 60S ribosomal protein L18-3-like [Camelina sativa]	0	38	6	187	19669.2	0.000519124	1.8165e+08	0.0448251	8.95587e+07	0.0239169	2.95225e+08	0.0613284	1.56608e+08	0.0286398	5.00766e+07	0.0128448
Csa_010417141.1	PREDICTED: nucleoid-associated protein At2g24020, chloroplastic [Camelina sativa]	0	63	4	187	19592.2	0.000517093	7.95715e+07	0.0196356	8.67711e+07	0.0231724	1.4196e+08	0.02949	1.3714e+08	0.0250796	1.19777e+08	0.0307231
Csa_010471683.1	PREDICTED: uncharacterized protein LOC104751441 isoform X1 [Camelina sativa]	0	7	0	209	21198.2	0.000500588	1.80361e+07	0.00398221	4.4404e+06	0.001061	2.15066e+07	0.00399739	6.23433e+06	0.0010201	5.79423e+06	0.00132979
Csa_010443324.1	PREDICTED: malate dehydrogenase, cytoplasmic-like [Camelina sativa]	0	35	0	372	36807	0.00048833	1.18499e+08	0.0146995	1.00417e+08	0.0134804	1.92658e+08	0.0201184	111679323	0.0102666	9.93822e+07	0.0128144
Csa_010434685.1	PREDICTED: asparagine--tRNA ligase, chloroplastic/mitochondrial-like [Camelina sativa]	0.004	2	1	567	55602.3	0.00048399	5344541	0.000434966	3.96884e+06	0.000349558		0	1.12935e+07	0.000681152	8746467	0.000739918
Csa_010424302.1	PREDICTED: uncharacterized protein LOC104709375 [Camelina sativa]	0.022	15	0	605	58910.3	0.000480577	1.24743e+08	0.00951456	3.82047e+07	0.00315355	136738978	0.00877984	135130820	0.00763831	64961395	0.00515032
Csa_010464993.1	PREDICTED: bifunctional protein FolD 2 [Camelina sativa]	0	37	9	299	27529.3	0.000454412	92178960	0.0142262	8.28289e+07	0.013834	1.12547e+08	0.0146222	1.4035e+08	0.0160524	9.84709e+07	0.0157969
Csa_010417456.1	PREDICTED: trifunctional UDP-glucose 4,6-dehydratase/UDP-4-keto-6-deoxy-D-glucose 3,5-epimerase/UDP-4-keto-L-rhamnose-reductase RHM1 isoform X3 [Camelina sativa]	0	64	13	671	60899.7	0.000447939	1.48083e+08	0.0101838	7.57147e+07	0.00563503	1.40871e+08	0.00815547	1.49038e+08	0.00759578	1.38515e+08	0.00990164
Csa_010505887.1	PREDICTED: ferredoxin-dependent glutamate synthase 2, chloroplastic-like isoform X1 [Camelina sativa]	0	74	4	1629	145080	0.000439555	6.84625e+06	0.000193937	5783663	0.000177305	1.44307e+07	0.000344126	1.26737e+07	0.000266061	11825561	0.000348205
Csa_010421055.1	PREDICTED: probable 2-carboxy-D-arabinitol-1-phosphatase [Camelina sativa]	0	26	9	490	42889.1	0.000431994	2.93682e+07	0.00276573	3.31313e+07	0.00337661	3.20341e+07	0.00253961	4.13325e+07	0.00288465	3.3781e+07	0.00330682
Csa_010423588.1	PREDICTED: pullulanase 1, chloroplastic-like [Camelina sativa]	0	2	2	969	84542.4	0.000430603		0	5509277	0.000283929		0		0		0
Csa_010433719.1	PREDICTED: 26S proteasome non-ATPase regulatory subunit 6 homolog [Camelina sativa]	0	28	6	387	31041.8	0.000395879	64635349	0.00770703	3.56198e+07	0.00459641	8.07512e+07	0.00810565	1.17035e+08	0.0103419	9.15255e+07	0.011344
Csa_010503434.1	PREDICTED: glycine--tRNA ligase, chloroplastic/mitochondrial 2 isoform X1 [Camelina sativa]	0	10	6	1078	86130.8	0.000394336	2.07569e+07	0.000888531	4.1979e+06	0.000194469	1.36451e+07	0.00049171	2.16709e+07	0.000687476	2.28111e+07	0.00101499
Csa_010465258.1	PREDICTED: chaperonin CPN60-like 2, mitochondrial [Camelina sativa]	0	9	5	572	44582	0.000384672	5.14009e+06	0.00041467	3264245	0.000284987	5.79775e+06	0.000393744	5.33434e+06	0.000318921	5.2582e+06	0.000440935
Csa_010426271.1	PREDICTED: aldehyde dehydrogenase family 2 member B4, mitochondrial [Camelina sativa]	0	33	9	537	39865.8	0.000366398	2.13661e+08	0.0183602	1.56493e+08	0.0145532	2.13729e+08	0.015461	2.50155e+08	0.0159306	2.13888e+08	0.019105
Csa_010453336.1	PREDICTED: dicarboxylate transporter 1, chloroplastic-like isoform X2 [Camelina sativa]	0	22	2	560	40445.8	0.000356461	42399804	0.00349385	1.81022e+07	0.00161429	6.08304e+07	0.00421971	4.64325e+07	0.00283552	5.20897e+07	0.00446167
Csa_010414918.1	PREDICTED: ATPase 1, plasma membrane-type isoform X2 [Camelina sativa]	0	189	0	949	67974	0.000353511	5.54497e+08	0.0269626	4.94828e+08	0.0260391	7.26659e+08	0.029745	7.83052e+08	0.0282177	6.29872e+08	0.0318361
Csa_010433858.1	PREDICTED: probable polygalacturonase [Camelina sativa]	0	13	4	444	31353.1	0.000348518	40436972	0.00420266	3.72517e+07	0.00418988	85482087	0.00747897	167057726	0.0128671	122966036	0.0132842
Csa_010453658.1	PREDICTED: KH domain-containing protein At4g18375 [Camelina sativa]	0.02	1	1	545	38329.3	0.000347106	10715044	0.000907247	10668377	0.000977553	9481402	0.000675812	13185246	0.000827351	7656418	0.00067385
Csa_010414912.1	PREDICTED: ATPase 1, plasma membrane-type isoform X1 [Camelina sativa]	0	189	0	980	67974	0.000342329	5.54497e+08	0.0261097	4.94828e+08	0.0252154	7.26659e+08	0.0288041	7.83052e+08	0.0273251	6.29872e+08	0.0308291
Csa_010467020.1	PREDICTED: mannose-1-phosphate guanyltransferase alpha-like [Camelina sativa]	0	11	0	406	28034.3	0.000340793	1.3254e+07	0.00150643	9.00184e+06	0.00110724	2.00337e+07	0.00191684	2.10312e+07	0.00177148	1.14733e+07	0.00135549
Csa_010511111.1	PREDICTED: photosynthetic NDH subunit of subcomplex B 2, chloroplastic-like isoform X2 [Camelina sativa]	0	8	0	312	21388.4	0.000338337	1.62183e+07	0.00239872	1.85796e+07	0.00297386	33092543	0.00412027	43615856	0.00478066	3.43287e+07	0.0052776
Csa_010416042.1	PREDICTED: mitochondrial import inner membrane translocase subunit TIM23-2-like [Camelina sativa]	0	3	2	188	12884.1	0.000338238	3265673	0.000801573		0	3.90584e+06	0.000807062	1.40991e+06	0.000256466	566872	0.000144631
Csa_010416348.1	PREDICTED: mannose-1-phosphate guanyltransferase alpha-like [Camelina sativa]	0	29	6	415	28034.3	0.000333402	6.18845e+07	0.00688116	4.30434e+07	0.00517961	6.60355e+07	0.00618129	79464065	0.00654818	5.26004e+07	0.00607959
Csa_010463696.1	PREDICTED: thioredoxin F1, chloroplastic [Camelina sativa]	0	47	0	183	12236.6	0.000330018	8.73741e+07	0.0220323	7.12297e+07	0.0194379	1.22103e+08	0.0259195	1.00311e+08	0.0187455	9.22323e+07	0.024175
Csa_019102011.1	PREDICTED: 10 kDa chaperonin, mitochondrial-like isoform X1 [Camelina sativa]	0	18	0	173	11333.2	0.00032332	9.25444e+07	0.0246849	50295034	0.0145184	9.90211e+07	0.0222347	2.01109e+08	0.0397543	1.06414e+08	0.0295043
Csa_010466820.1	PREDICTED: dihydroxy-acid dehydratase, chloroplastic [Camelina sativa]	0	14	6	609	38721.2	0.000313804	36860947	0.00279304	6.33441e+06	0.00051943	3.22794e+07	0.00205901	3.87285e+07	0.00217476	3.08184e+07	0.00242731
Csa_010422927.1	PREDICTED: 26S proteasome non-ATPase regulatory subunit 12 homolog A [Camelina sativa]	0	17	0	442	27800.5	0.000310425	3.17074e+07	0.00331029	1.15178e+07	0.00130133	2.77301e+07	0.00243713	43032861	0.00332948	2.67855e+07	0.00290677
Csa_010444421.1	PREDICTED: 26S proteasome non-ATPase regulatory subunit 12 homolog B [Camelina sativa]	0	13	0	442	27800.5	0.000310425	2.86302e+07	0.00298903	9.86499e+06	0.00111458	2.36435e+07	0.00207797	3.58174e+07	0.00277121	2.22475e+07	0.00241431
Csa_010414866.1	PREDICTED: photosynthetic NDH subunit of subcomplex B 2, chloroplastic [Camelina sativa]	0	8	0	351	21388.4	0.000300744	1.62183e+07	0.0021322	1.85796e+07	0.00264344	33092543	0.00366246	43615856	0.00424948	3.43287e+07	0.0046912
Csa_019085062.1	PREDICTED: V-type proton ATPase subunit B2-like isoform X1 [Camelina sativa]	0	152	20	508	30202.5	0.000293431	4.04476e+08	0.0367416	2.41325e+08	0.0237234	5.36548e+08	0.0410294	4.56375e+08	0.0307225	4.0827e+08	0.0385494
Csa_010461511.1	PREDICTED: cysteine proteinase RD21A-like [Camelina sativa]	0	170	5	462	27141.5	0.000289947	2.62582e+08	0.0262271	3.11925e+08	0.0337169	4.45222e+08	0.0374355	428576018	0.0317237	2.65318e+08	0.0275461
Csa_019094920.1	PREDICTED: 14-3-3-like protein GF14 omicron [Camelina sativa]	0	25	1	237	13920.5	0.000289891	22516528	0.00438411	6297078	0.00132687	64471452	0.0105674	103291560	0.0149044	79501488	0.0160902
Csa_010420761.1	PREDICTED: aspartate aminotransferase, cytoplasmic isozyme 1 [Camelina sativa]	0	24	7	405	23104.3	0.000281556	3.15275e+07	0.00359222	1.764e+07	0.00217511	3.16993e+07	0.0030405	24304594	0.00205226	1.42616e+07	0.00168907
Csa_010431555.1	PREDICTED: kinesin-like protein KIN-7M, chloroplastic [Camelina sativa]	0	2	0	1084	58343.5	0.000265638	15419700	0.000656409	19754847	0.000910087	14865972	0.000532738	18851852	0.000594734	6.35194e+06	0.000281068
Csa_010414944.1	PREDICTED: linoleate 9S-lipoxygenase 1 [Camelina sativa]	0	11	3	860	45213.4	0.000259475	1.3128e+07	0.000704416	6.85171e+06	0.000397868	26008631	0.00117481	2.38628e+07	0.000948901	3.14172e+07	0.00175228
Csa_010421692.1	PREDICTED: rubisco accumulation factor 1.1, chloroplastic [Camelina sativa]	0	45	13	435	22766.7	0.000258307	1.38771e+08	0.0147211	9.76037e+07	0.0112051	1.48523e+08	0.0132633	1.83491e+08	0.0144253	1.31974e+08	0.0145524
Csa_010433265.1	PREDICTED: protein TSS [Camelina sativa]	0	79	21	1802	86767	0.000237644	2.06388e+08	0.00528516	1.04667e+08	0.00290064	1.92375e+08	0.00414708	2.02623e+08	0.00384531	1.72539e+08	0.00459268
Csa_019098151.1	PREDICTED: protein TSS isoform X1 [Camelina sativa]	0	52	12	1814	82630.9	0.000224818	5.55683e+07	0.00141357	4.69721e+07	0.00129313	6.42384e+07	0.00137565	7.58132e+07	0.00142924	5.99592e+07	0.00158545
Csa_010423841.1	PREDICTED: 60S ribosomal protein L35-4 [Camelina sativa]	0	4	0	123	5594.35	0.000224477	1.78304e+06	0.000668935	79526.2	3.22882e-05	6.31513e+06	0.00199447	5.71125e+06	0.0015879	3.06801e+06	0.00119643
Csa_010427278.1	PREDICTED: 60S ribosomal protein L35-1 [Camelina sativa]	0	4	0	123	5594.35	0.000224477	1.78304e+06	0.000668935	79526.2	3.22882e-05	6.31513e+06	0.00199447	5.71125e+06	0.0015879	3.06801e+06	0.00119643
Csa_010476869.1	PREDICTED: ATPase 10, plasma membrane-type-like [Camelina sativa]	0	24	0	187	8355.31	0.00022052	7.29844e+07	0.0180101	6.25338e+07	0.0166998	103363416	0.0214721	137197493	0.0250901	9.83344e+07	0.0252231
Csa_010458925.1	PREDICTED: 60S ribosomal protein L10-1 [Camelina sativa]	0	84	4	220	9202.21	0.000206441	2.32177e+08	0.0486995	9.56454e+07	0.021711	2.32231e+08	0.041006	2.83702e+08	0.0440998	4.08564e+08	0.0890782
Csa_010429657.1	PREDICTED: uncharacterized protein LOC104714100 [Camelina sativa]	0	8	2	239	9901.47	0.000204469	55033399	0.0106257	2.97751e+07	0.00622148	4.55143e+07	0.00739775	4.69538e+07	0.00671848	3.36838e+07	0.00676015
Csa_010466217.1	PREDICTED: protein TRIGALACTOSYLDIACYLGLYCEROL 2, chloroplastic isoform X1 [Camelina sativa]	0	3	2	386	15701.7	0.000200764	4.12153e+06	0.000492719	6.30717e+06	0.000815992	19145166	0.00192673	17236367	0.00152706	1.53305e+07	0.00190503
Csa_019090533.1	PREDICTED: 26S proteasome non-ATPase regulatory subunit 12 homolog A-like isoform X1 [Camelina sativa]	0	17	0	697	27800.5	0.000196855	3.17074e+07	0.00209921	1.15178e+07	0.000825232	2.77301e+07	0.0015455	43032861	0.00211138	2.67855e+07	0.00184332
Csa_010413173.1	PREDICTED: 60S ribosomal protein L8-1 isoform X1 [Camelina sativa]	0	172	10	258	10269.5	0.000196453	6.05938e+08	0.108377	3.59103e+08	0.0695084	6.3867e+08	0.0961628	6.16438e+08	0.0817086	4.74813e+08	0.0882747
Csa_010428454.1	PREDICTED: 26S protease regulatory subunit 6A homolog A [Camelina sativa]	0	36	9	424	16655	0.000193868	7.87315e+07	0.00856862	5.05964e+07	0.00595926	7.00216e+07	0.00641529	9.54239e+07	0.00769643	7.46529e+07	0.0084453
Csa_010446610.1	PREDICTED: uncharacterized protein At4g37920, chloroplastic [Camelina sativa]	0.005	2	2	424	16520.6	0.000192303	731893	7.96545e-05		0	948641	8.69132e-05	3.36017e+06	0.000271015	2.70426e+06	0.000305926
Csa_010413437.1	PREDICTED: uncharacterized protein At3g61260-like [Camelina sativa]	0	25	4	223	8523.76	0.000188648	2.32044e+07	0.00480169	2.05084e+07	0.00459267	8.0068e+07	0.0139477	4.66171e+07	0.00714889	2.74865e+07	0.00591219
Csa_010475556.1	PREDICTED: calcium-transporting ATPase 1, endoplasmic reticulum-type-like [Camelina sativa]	0	12	4	1059	39450.8	0.00018386	7.3447e+06	0.000320042	3.38606e+06	0.000159675	7.83929e+06	0.000287561	9.50631e+06	0.000306983	8.52571e+06	0.000386161
Csa_019084076.1	PREDICTED: stress-induced protein KIN2 [Camelina sativa]	0	47	7	66	2455.49	0.000183621	1.33831e+08	0.0935712	7.55094e+07	0.0571341	8.0273e+07	0.0472471	1.40098e+08	0.0725916	7.8965e+07	0.0573885
Csa_010498868.1	PREDICTED: 40S ribosomal protein S7-2 [Camelina sativa]	0	13	6	191	7045.4	0.000182054	64859141	0.0156699	1.82217e+07	0.00476424	3.48237e+07	0.00708258	3.26423e+07	0.00584447	2.77255e+07	0.00696272
Csa_019085555.1	PREDICTED: uncharacterized protein LOC104715499 [Camelina sativa]	0	52	1	178	6556.99	0.000181807	12224491	0.00316912	30016180	0.0084212	25775300	0.00562514	59656676	0.0114614	39702308	0.0106987
Csa_010432472.1	PREDICTED: uncharacterized protein LOC104716744 isoform X1 [Camelina sativa]	0	6	3	336	12144.6	0.00017839	10799296	0.00148315	2.74196e+06	0.000407531	9.94564e+06	0.00114986	8941130	0.000910021	8515872	0.00121569
Csa_010417246.1	PREDICTED: F-box/kelch-repeat protein At4g39753-like [Camelina sativa]	0.009	11	1	387	13592.7	0.000173349	1.66048e+08	0.0197993	100768555	0.0130033	140719024	0.0141251	312709380	0.027633	149779216	0.0185641
Csa_010460614.1	PREDICTED: non-classical arabinogalactan protein 31-like [Camelina sativa]	0	47	3	325	11302.3	0.000171637	2.04397e+08	0.0290215	1.75853e+07	0.00270212	3.21699e+08	0.0384517	2.97136e+08	0.0312659	2.50613e+08	0.0369874
Csa_010499343.1	PREDICTED: non-classical arabinogalactan protein 31-like [Camelina sativa]	0	33	0	325	11302.3	0.000171637	1.44463e+08	0.0205117	1.43266e+07	0.0022014	2.11314e+08	0.0252577	180108707	0.0189518	1.38496e+08	0.0204404
Csa_010447121.1	PREDICTED: D-3-phosphoglycerate dehydrogenase 1, chloroplastic isoform X2 [Camelina sativa]	0	45	3	605	20715.2	0.00016899	1.48254e+08	0.0113078	1.04393e+08	0.00861693	1.63882e+08	0.0105227	2.43323e+08	0.0137539	165935980	0.0131559
Csa_010435839.1	PREDICTED: protease Do-like 8, chloroplastic isoform X1 [Camelina sativa]	0	14	4	454	14606.2	0.000158784	2.22804e+07	0.00226462	1.14284e+07	0.0012571	1.3616e+07	0.00116505	2.41922e+07	0.00182229	1.22388e+07	0.00129305
Csa_010431959.1	PREDICTED: LOW QUALITY PROTEIN: inositol-3-phosphate synthase isozyme 1-like [Camelina sativa]	0	6	0	510	16188.3	0.00015666	2.90103e+06	0.000262488	3.19182e+06	0.000312541	1336918	0.000101832	1.64035e+07	0.00109993	1.86298e+07	0.00175215
Csa_010416979.1	PREDICTED: inositol-3-phosphate synthase isozyme 2 [Camelina sativa]	0	6	0	510	16188.3	0.00015666	2.90103e+06	0.000262488	3.19182e+06	0.000312541	1336918	0.000101832	1.64035e+07	0.00109993	1.86298e+07	0.00175215
Csa_010426749.1	PREDICTED: ERBB-3 BINDING PROTEIN 1 isoform X1 [Camelina sativa]	0	44	11	393	12045.5	0.000151272	1.79636e+08	0.0210925	6.92003e+07	0.00879333	1.73032e+08	0.0171035	2.1727e+08	0.0189063	1.74677e+08	0.0213195
Csa_010446462.1	PREDICTED: glycine-rich RNA-binding protein 8-like [Camelina sativa]	0	120	5	170	5203.41	0.000151066	2.42574e+08	0.0658451	8.12242e+07	0.0238602	1.78515e+08	0.040792	1.28931e+08	0.0259361	9.07491e+07	0.0256052
Csa_010453346.1	PREDICTED: DNA-damage-repair/toleration protein DRT100-like isoform X1 [Camelina sativa]	0.007	1	1	373	11332.1	0.000149944	1.63065e+06	0.000201735	713624	9.5543e-05		0	905635	8.30314e-05	198453	2.55201e-05
Csa_010436012.1	PREDICTED: prohibitin-3, mitochondrial [Camelina sativa]	0	16	2	277	8043.58	0.000143317	6.21764e+07	0.010358	3.12296e+07	0.00563021	5.71623e+07	0.00801641	7.25493e+07	0.00895678	46048180	0.00797382
Csa_010425473.1	PREDICTED: prohibitin-4, mitochondrial-like [Camelina sativa]	0	10	0	279	8043.58	0.000142289	2.99825e+07	0.00495897	1.89167e+07	0.00338595	4.46859e+07	0.00622181	4.82792e+07	0.00591771	27292720	0.0046922
Csa_010479318.1	PREDICTED: nucleolin 1-like [Camelina sativa]	0	43	11	554	15613.3	0.000139095	3.66078e+08	0.0304924	2.22755e+08	0.0200796	4.43891e+08	0.0311255	5.13639e+08	0.0317063	5.434e+08	0.0470483
Csa_010428483.1	PREDICTED: NAD(P)H-quinone oxidoreductase subunit O, chloroplastic-like [Camelina sativa]	0.001	2	1	159	4432.49	0.000137587	507024	0.00014715	497261	0.00015618	2.60602e+06	0.000636694	5523984	0.0011881	4714604	0.00142227
Csa_010467220.1	PREDICTED: methylmalonate-semialdehyde dehydrogenase [acylating], mitochondrial isoform X1 [Camelina sativa]	0	3	3	535	14145.2	0.000130491	8.22812e+06	0.0007097	2.32369e+06	0.000216902	3.2701e+06	0.000237442	6333915	0.000404871	4.06416e+06	0.000364377
Csa_019086355.1	PREDICTED: elongation factor 1-alpha-like [Camelina sativa]	0	13	0	137	3606.74	0.000129933	8.869e+07	0.0298732	2.69657e+07	0.00982945	7.46522e+07	0.0211676	98424609	0.0245686	7.68141e+07	0.0268939
Csa_010453196.1	PREDICTED: aspartate aminotransferase 3, chloroplastic [Camelina sativa]	0	33	8	455	11786	0.000127845	284857080	0.0288897	2.76338e+08	0.0303297	3.80407e+08	0.0324778	5.48976e+08	0.041261	3.90384e+08	0.0411542
Csa_010505110.1	PREDICTED: fasciclin-like arabinogalactan protein 16 [Camelina sativa]	0	1	1	492	12280.8	0.000123193	3.76456e+06	0.000353084	150475	1.52735e-05	358572	2.83114e-05	585544	4.06999e-05	277540	2.70579e-05
Csa_010422687.1	PREDICTED: protein translocase subunit SECA1, chloroplastic [Camelina sativa]	0	45	1	1014	25183.6	0.000122576	1.53701e+08	0.00699466	9.63557e+07	0.00474545	1.24623e+08	0.00477431	1.41578e+08	0.00477481	1.141e+08	0.00539736
Csa_010463632.1	PREDICTED: developmental protein SEPALLATA 2-like [Camelina sativa]	0.022	10	0	250	6147.81	0.000121369	40337616	0.00744558	38529484	0.00769647	60283056	0.0093671	23778548	0.0032527	26094902	0.00500668
Csa_019098053.1	PREDICTED: BAHD acyltransferase DCR-like isoform X1 [Camelina sativa]	0	21	6	467	11472.3	0.000121244	3.65322e+07	0.00360983	1.76027e+07	0.00188235	61139076	0.00508571	6.0942e+07	0.00446271	5.35643e+07	0.00550164
Csa_010420253.1	PREDICTED: developmental protein SEPALLATA 1-like isoform X1 [Camelina sativa]	0.022	10	0	252	6147.81	0.000120406	40337616	0.00738648	38529484	0.00763539	60283056	0.00929276	23778548	0.00322688	26094902	0.00496694
Csa_010505810.1	PREDICTED: expansin-A8-like [Camelina sativa]	0.014	8	0	257	6021.31	0.000115634	16825765	0.00302113	8.59989e+06	0.00167108	2.15333e+07	0.00325483	2.01996e+07	0.00268787	13897158	0.00259374
Csa_010414459.1	PREDICTED: expansin-A6-like [Camelina sativa]	0.014	8	0	257	6021.31	0.000115634	16825765	0.00302113	8.59989e+06	0.00167108	2.15333e+07	0.00325483	2.01996e+07	0.00268787	13897158	0.00259374
Csa_010456511.2	PREDICTED: uncharacterized protein LOC104737966, partial [Camelina sativa]	0.005	2	1	697	16212.5	0.0001148	5.15801e+06	0.00034149	1.75894e+06	0.000126025	7.40484e+06	0.000412698	9.41183e+06	0.000461785	3.86996e+06	0.000266323
Csa_010508552.1	PREDICTED: 14-3-3-like protein GF14 mu isoform X1 [Camelina sativa]	0	102	7	264	6053.27	0.000113165	1.39141e+08	0.0243209	1.10293e+08	0.0208632	2.03202e+08	0.0299001	2.35406e+08	0.0304938	1.97305e+08	0.0358482
Csa_019094301.1	PREDICTED: DEAD-box ATP-dependent RNA helicase 2-like, partial [Camelina sativa]	0.009	32	1	287	6542.04	0.000112501	3.35755e+07	0.00539844	327269608	0.0569459	1.18088e+08	0.0159836	73714858	0.00878357	4.95275e+07	0.00827749
Csa_010505660.1	PREDICTED: protein HESO1-like isoform X1 [Camelina sativa]	0.007	38	2	501	11404.2	0.000112345	5.30949e+06	0.000489038	216045	2.1535e-05	8.24218e+06	0.000639078	8656064	0.000590855	7.04233e+06	0.000674237
Csa_010422958.1	PREDICTED: soluble inorganic pyrophosphatase 6, chloroplastic [Camelina sativa]	0	73	9	300	6679.54	0.000109888	1.88818e+08	0.0290436	1.04922e+08	0.0174656	2.29005e+08	0.0296534	2.41764e+08	0.0275593	1.90113e+08	0.0303966
Csa_019084010.1	PREDICTED: L-ascorbate peroxidase S, chloroplastic/mitochondrial-like isoform X1 [Camelina sativa]	0	31	4	379	8352.01	0.000108762	1.03961e+08	0.0126579	8.34916e+07	0.0110013	8.2179e+07	0.00842309	103463672	0.0093357	4.82865e+07	0.00611111
Csa_010511610.1	PREDICTED: LOW QUALITY PROTEIN: glycerophosphodiester phosphodiesterase GDPDL1-like [Camelina sativa]	0	30	3	764	16217.4	0.000104764	9.08945e+07	0.00549	6.33607e+07	0.00414157	3.48755e+07	0.00177328	4.22504e+07	0.00189119	7.79712e+07	0.00489525
Csa_010457451.1	PREDICTED: eukaryotic translation initiation factor 2 subunit gamma [Camelina sativa]	0	25	8	465	9824.02	0.000104271	6.34944e+07	0.00630102	1.78063e+07	0.00191232	4.06908e+07	0.00339933	6.47519e+07	0.00476209	4.71221e+07	0.00486078
Csa_010420282.1	PREDICTED: 14-3-3-like protein GF14 upsilon [Camelina sativa]	0	135	2	267	5516.16	0.000101965	3.57727e+07	0.00618257		0	2.58542e+06	0.000376158	1.86014e+07	0.0023825	2.59806e+06	0.000466737
Csa_019095184.1	PREDICTED: ras-related protein RABG3b-like isoform X3 [Camelina sativa]	0	8	0	91	1876.41	0.000101769	1.45626e+07	0.00738459	8.26488e+06	0.00453559	1.74653e+07	0.00745565	24982942	0.00938859	15587582	0.0082162
Csa_010446699.1	PREDICTED: red chlorophyll catabolite reductase, chloroplastic-like [Camelina sativa]	0	5	1	314	6371.94	0.000100154	4680300	0.000687816	1.92043e+06	0.000305427	4.87832e+07	0.00603519	37606788	0.00409576	2.82969e+07	0.00432258
Csa_010457174.1	PREDICTED: pyruvate dehydrogenase E1 component subunit alpha-3, chloroplastic [Camelina sativa]	0	44	14	430	8700.69	9.98647e-05	8.66505e+07	0.00929888	5.15505e+07	0.00598691	8.99461e+07	0.00812575	1.18393e+08	0.00941573	7.32253e+07	0.00816821
Csa_010459250.1	PREDICTED: ras-related protein RABA1b [Camelina sativa]	0	41	4	216	4282.11	9.78433e-05	1.21605e+08	0.0259791	7.34898e+07	0.0169907	1.48494e+08	0.0267057	2.26519e+08	0.0358632	1.47174e+08	0.0326822
Csa_019087580.1	PREDICTED: uncharacterized protein LOC109127400 [Camelina sativa]	0.041	1	1	358	7070.95	9.74814e-05	6953654	0.00089631		0	19066448	0.00206889	20572698	0.0019652	13876504	0.00185922
Csa_010483179.1	PREDICTED: nucleosome assembly protein 1;3 [Camelina sativa]	0.005	6	0	376	7391.18	9.70181e-05	30519940	0.00374562	25251922	0.00335386	36935107	0.00381594	45334432	0.00412324	29844562	0.00380725
Csa_010467894.1	PREDICTED: nucleosome assembly protein 1;2 [Camelina sativa]	0	17	5	378	7391.18	9.65047e-05	8.7886e+07	0.0107289	5.82123e+07	0.00769062	98951073	0.010169	1.05797e+08	0.00957151	8.52697e+07	0.0108202
Csa_010486966.1	PREDICTED: cysteine proteinase inhibitor 6 [Camelina sativa]	0	10	3	232	4512.2	9.59902e-05	4.93401e+07	0.00981386	3.825e+06	0.000823344	2.95972e+07	0.00495579	5.43947e+07	0.00801802	4.02184e+07	0.00831517
Csa_010432025.1	PREDICTED: cytochrome c oxidase subunit 6a, mitochondrial [Camelina sativa]	0	4	1	102	1948.47	9.42803e-05	5638584	0.00255093	5.15016e+06	0.0025215	5.36011e+06	0.00204138	2.83416e+06	0.000950215	4222466	0.00198564
Csa_010419855.1	PREDICTED: uncharacterized protein LOC104705539 [Camelina sativa]	0.013	1	0	865	16212.5	9.25038e-05	2.17371e+06	0.000115961	845901	4.88362e-05	5.0176e+06	0.000225336	4.55126e+06	0.000179934	2.34988e+06	0.000130306
Csa_010435754.1	PREDICTED: 14-3-3-like protein GF14 psi isoform X1 [Camelina sativa]	0	190	5	293	5201.98	8.76249e-05	2.57729e+08	0.0405905	1.68641e+08	0.0287431	2.30481e+08	0.0305574	3.94452e+08	0.0460388	2.78533e+08	0.0455978
Csa_010504108.1	PREDICTED: 29 kDa ribonucleoprotein, chloroplastic [Camelina sativa]	0	83	6	338	5914.42	8.63618e-05	3.76487e+08	0.0513998	3.40008e+08	0.0502355	4.11371e+08	0.0472788	5.17123e+08	0.052321	3.54e+08	0.0502366
Csa_010513618.1	PREDICTED: glycerophosphodiester phosphodiesterase GDPDL1-like, partial [Camelina sativa]	0	13	0	647	11292.9	8.61448e-05	5.28631e+06	0.00037703	21777511	0.0016809	11321729	0.000679764	11348685	0.000599845	6346745	0.000470523
Csa_010426306.1	PREDICTED: uncharacterized protein LOC104711313 [Camelina sativa]	0	14	4	221	3733.34	8.33742e-05	3.5517e+07	0.00741604	2.37589e+07	0.00536875	4.41657e+07	0.00776324	2.89142e+07	0.00447421	2.86916e+07	0.00622726
Csa_010440041.1	PREDICTED: putative WEB family protein At4g17210 [Camelina sativa]	0.012	1	0	276	4586.81	8.20217e-05	182810	3.05646e-05	306645	5.54837e-05	849788	0.000119606	4.70225e+06	0.000582633	2.93263e+06	0.000509662
Csa_010442176.1	PREDICTED: B-cell receptor-associated protein 31-like [Camelina sativa]	0	4	1	218	3420.18	7.74318e-05	1.24882e+06	0.000264345	2.0407e+06	0.000467477	1.42941e+06	0.000254713	3.12765e+06	0.000490636	1.45994e+06	0.000321226
Csa_019091678.1	PREDICTED: stress-associated endoplasmic reticulum protein 2-like [Camelina sativa]	0	5	2	68	1048.68	7.6113e-05	1.31045e+07	0.00889282	7.51658e+06	0.00552014	22717382	0.0129777	27080932	0.0136192	23343560	0.0164662
Csa_010439224.1	PREDICTED: chaperone protein dnaJ GFA2, mitochondrial [Camelina sativa]	0.011	4	2	455	6972.95	7.56366e-05	190391303	0.0193092	151332432	0.0166096	165350576	0.0141171	266055186	0.0199967	115778954	0.0122054
Csa_010461079.1	PREDICTED: uncharacterized protein LOC104741854 [Camelina sativa]	0	7	2	181	2740.17	7.47181e-05	19946412	0.00508527	29189689	0.00805359	23289468	0.0049984	28772093	0.00543614	2.26369e+07	0.0059989
Csa_010515076.2	PREDICTED: thioredoxin reductase 2-like [Camelina sativa]	0	7	2	382	5665.07	7.31929e-05	5.69818e+06	0.000688336	2.64393e+06	0.000345641	7.0098e+06	0.00071284	8839807	0.000791366	5.77008e+06	0.000724523
Csa_010482945.1	PREDICTED: phenylalanine ammonia-lyase 4 [Camelina sativa]	0	10	0	706	10394.1	7.2662e-05	13079639	0.000854908	4.4333e+06	0.000313589	9.4246e+06	0.000518571	2.0882e+07	0.0010115	1.4682e+07	0.000997506
Csa_010442677.1	PREDICTED: CDGSH iron-sulfur domain-containing protein NEET [Camelina sativa]	0	21	2	111	1627.37	7.23587e-05	3.75005e+07	0.0155899	3.04751e+07	0.0137107	4.39708e+07	0.0153883	6.99787e+07	0.0215596	4.23752e+07	0.0183115
Csa_010432279.1	PREDICTED: thioredoxin reductase 1 isoform X1 [Camelina sativa]	0	2	0	390	5665.07	7.16915e-05	548599	6.49111e-05		0	793594	7.90467e-05	546882	4.79543e-05	372300	4.57891e-05
Csa_010413378.1	PREDICTED: putative glucose-6-phosphate 1-epimerase isoform X2 [Camelina sativa]	0.02	5	0	293	4248.65	7.15665e-05	1.02053e+07	0.00160727	1.22643e+07	0.00209032	36521896	0.00484212	1.41166e+07	0.00164763	6.52756e+06	0.00106861
Csa_010416914.1	PREDICTED: 40S ribosomal protein S25-2 [Camelina sativa]	0	43	1	108	1554.28	7.10285e-05	1.50428e+08	0.0642736	4.72117e+07	0.0218305	8.07855e+07	0.0290576	8.1915e+07	0.0259381	4.84257e+07	0.0215073
Csa_010505261.1	PREDICTED: phenylalanine ammonia-lyase 1-like [Camelina sativa]	0	20	5	727	10394.1	7.05631e-05	3.52161e+07	0.0022353	1.76603e+07	0.00121311	4.07257e+07	0.00217613	5.38237e+07	0.00253185	4.44298e+07	0.00293139
Csa_010444337.1	PREDICTED: non-specific lipid-transfer protein-like protein At5g64080 [Camelina sativa]	0	5	1	183	2592.86	6.99285e-05	7282233	0.00183629	2014019	0.000549605	6.914e+06	0.00146767	11860135	0.00221634	8.05645e+06	0.00211167
Csa_010428148.1	PREDICTED: germin-like protein subfamily 3 member 1 [Camelina sativa]	0	85	4	209	2954.52	6.97697e-05	5.81069e+08	0.128295	496371124	0.118604	6.25331e+08	0.116229	5.97568e+08	0.0977775	5.241e+08	0.120282
Csa_010422097.1	PREDICTED: eukaryotic translation initiation factor 3 subunit A [Camelina sativa]	0	39	17	985	13547.7	6.78822e-05	7.15273e+07	0.00335092	3.29275e+07	0.0016694	6.70799e+07	0.00264549	8.74061e+07	0.00303462	7.16226e+07	0.00348777
Csa_010467031.1	PREDICTED: fasciclin-like arabinogalactan protein 7 [Camelina sativa]	0	26	3	256	3491.07	6.73046e-05	1.20576e+08	0.0217344	2.06623e+07	0.00403068	1.10458e+08	0.0167612	1.68293e+08	0.0224815	51031123	0.00956157
Csa_010420161.1	PREDICTED: mitochondrial outer membrane protein porin 3 [Camelina sativa]	0	88	6	276	3743.37	6.69391e-05	7.03358e+07	0.0117597	85066687	0.0153918	9.49313e+07	0.0133613	1.0288e+08	0.0127474	6.33884e+07	0.0110163
Csa_010416398.1	PREDICTED: isoflavone reductase homolog P3 [Camelina sativa]	0	51	4	311	4207.7	6.67746e-05	7.23752e+07	0.0107388	1.0625e+08	0.0170611	9.00017e+07	0.0112419	1.27722e+08	0.0140444	7.84885e+07	0.0121054
Csa_010434707.1	PREDICTED: LOW QUALITY PROTEIN: farnesyl pyrophosphate synthase 2-like [Camelina sativa]	0	6	0	342	4586.81	6.61929e-05	8.15313e+06	0.00110009	7.76998e+06	0.00113457	9.0759e+06	0.00103089	1.76493e+07	0.00176482	1.13883e+07	0.00159723
Csa_010469105.1	PREDICTED: putative glucose-6-phosphate 1-epimerase [Camelina sativa]	0.02	5	0	320	4248.65	6.55281e-05	1.02053e+07	0.00147165	1.22643e+07	0.00191395	36521896	0.00443357	1.41166e+07	0.00150861	6.52756e+06	0.000978442
Csa_010416412.1	PREDICTED: 50S ribosomal protein L31, chloroplastic-like [Camelina sativa]	0	25	4	153	2018.11	6.51e-05	5.05086e+07	0.0152336	38424526	0.0125417	61182904	0.0155342	8.60068e+07	0.0192238	7.29092e+07	0.0228573
Csa_010457638.1	PREDICTED: synaptotagmin-5 [Camelina sativa]	0.015	2	1	560	7313.34	6.44547e-05	167001	1.37613e-05	94349.5	8.41375e-06	401816	2.78733e-05	391172	2.38879e-05	275794	2.36228e-05
Csa_010420717.1	PREDICTED: glucose-1-phosphate adenylyltransferase large subunit 1, chloroplastic [Camelina sativa]	0	74	12	521	6730.16	6.3755e-05	1.31475e+08	0.0116448	1.13176e+08	0.0108482	1.63321e+08	0.0121774	1.97238e+08	0.0129465	1.55866e+08	0.0143499
Csa_010507095.1	PREDICTED: UPF0496 protein At3g28270-like [Camelina sativa]	0.001	5	1	294	3770.54	6.3297e-05	3.76835e+06	0.000591468	2.44111e+06	0.000414646	1.90126e+07	0.00251214	9448248	0.00109901	8445578	0.00137789
Csa_010413372.1	PREDICTED: tubulin gamma-1 chain-like [Camelina sativa]	0.011	3	1	474	5981.39	6.22803e-05	19575908	0.00190578	29261285	0.00308286	4.14886e+07	0.00340017	43183141	0.00311554	26941547	0.00272633
Csa_010509620.1	PREDICTED: photosystem II 5 kDa protein, chloroplastic-like [Camelina sativa]	0	25	1	131	1618.92	6.09931e-05	4.2555e+07	0.0149902	2.77477e+07	0.0105778	5.44936e+07	0.0161594	6.89768e+07	0.0180065	4.83359e+07	0.0176983
Csa_010421275.1	PREDICTED: ribosome-binding factor PSRP1, chloroplastic [Camelina sativa]	0	25	6	306	3779.85	6.09649e-05	5.00873e+07	0.00755326	3.26114e+07	0.00532214	5.06361e+07	0.00642819	4.91741e+07	0.00549557	4.65315e+07	0.00729389
Csa_010422572.1	PREDICTED: NADH dehydrogenase [ubiquinone] flavoprotein 2, mitochondrial [Camelina sativa]	0	14	3	256	3143.79	6.06094e-05	3.89436e+07	0.00701979	3.86347e+07	0.00753661	35222889	0.00534484	48469705	0.00647483	2.86033e+07	0.00535932
Csa_010449655.1	PREDICTED: farnesyl pyrophosphate synthase 2-like isoform X1 [Camelina sativa]	0	6	0	375	4586.81	6.0368e-05	8.15313e+06	0.00100328	7.76998e+06	0.00103473	9.0759e+06	0.000940174	1.76493e+07	0.00160951	1.13883e+07	0.00145668
Csa_010481370.1	PREDICTED: farnesyl pyrophosphate synthase 1, mitochondrial [Camelina sativa]	0	12	1	388	4586.81	5.83453e-05	1.50737e+07	0.00179273	9.62003e+06	0.00123818	16327954	0.00163474	2.77727e+07	0.00244785	1.94777e+07	0.0024079
Csa_010506317.1	PREDICTED: 60S ribosomal protein L7-3 [Camelina sativa]	0	99	4	242	2822.14	5.75559e-05	7.1276e+07	0.0135912	3.67257e+07	0.00757868	113756267	0.0182604	5.68225e+07	0.00802977	5.42021e+07	0.0107432
Csa_010458731.1	PREDICTED: eukaryotic peptide chain release factor subunit 1-2 [Camelina sativa]	0	3	0	434	4778.88	5.43454e-05	2.13325e+06	0.00022682	453095	5.21361e-05	1.3128e+06	0.000117506	3353600	0.000264253	1.94257e+06	0.000214695
Csa_010425373.1	PREDICTED: eukaryotic peptide chain release factor subunit 1-3-like [Camelina sativa]	0	3	0	435	4778.88	5.42205e-05	2.13325e+06	0.000226298	453095	5.20162e-05	1.3128e+06	0.000117235	3353600	0.000263645	1.94257e+06	0.000214201
Csa_010419253.1	PREDICTED: peptidyl-prolyl cis-trans isomerase CYP19-2-like [Camelina sativa]	0	11	0	164	1781.73	5.36197e-05	31195959	0.00877774	1.67713e+07	0.00510694	26463436	0.00626834	50112880	0.0104497	38070625	0.0111347
Csa_010466847.1	PREDICTED: fe-S cluster assembly factor HCF101, chloroplastic isoform X3 [Camelina sativa]	0	18	0	510	5528.38	5.35001e-05	2.72137e+07	0.00246232	6.39039e+06	0.000625742	3.03172e+07	0.00230923	2.8392e+07	0.00190381	15193526	0.00142897
Csa_010447944.1	PREDICTED: photosystem II reaction center PSB28 protein, chloroplastic-like [Camelina sativa]	0	29	3	184	1993.5	5.34718e-05	7.26506e+07	0.01822	4.38229e+07	0.0118938	1.18058e+08	0.0249246	135807445	0.0252408	1.16801e+08	0.0304482
Csa_010506451.1	PREDICTED: vesicle-associated protein 1-2 [Camelina sativa]	0	5	3	239	2548.34	5.26244e-05	1.49047e+07	0.00287775	5.16897e+06	0.00108005	1.73679e+07	0.00282293	1.81875e+07	0.00260239	1.5154e+07	0.00304132
Csa_010487709.1	PREDICTED: phosphoethanolamine N-methyltransferase 1 isoform X1 [Camelina sativa]	0	13	1	494	5236.83	5.23201e-05	11712841	0.00109412	5852705	0.000591654	15310072	0.00120393		0		0
Csa_010454327.1	PREDICTED: blue copper protein-like [Camelina sativa]	0	2	2	208	2189.6	5.19551e-05	1.06932e+07	0.00237233	1.22087e+07	0.0029312	8.29727e+06	0.00154961	5.58371e+06	0.000918032	4.28154e+06	0.000987349
Csa_010472091.1	PREDICTED: peptidyl-prolyl cis-trans isomerase CYP19-2 [Camelina sativa]	0	12	0	174	1781.73	5.05381e-05	3.20169e+07	0.00849099	2.14203e+07	0.00614773	29753830	0.00664268	72423902	0.0142341	4.63166e+07	0.012768
Csa_010466845.1	PREDICTED: fe-S cluster assembly factor HCF101, chloroplastic isoform X1 [Camelina sativa]	0	18	0	543	5528.38	5.02487e-05	2.72137e+07	0.00231268	6.39039e+06	0.000587713	3.03172e+07	0.00216889	2.8392e+07	0.00178811	15193526	0.00134212
Csa_010508094.1	PREDICTED: U-box domain-containing protein 33 [Camelina sativa]	0.012	10	1	839	8412.53	4.94871e-05	121571560	0.00668649	84452864	0.00502679	103819504	0.00480692	177936688	0.00725273	116945200	0.00668581
Csa_010414863.1	PREDICTED: cysteine protease inhibitor WSCP-like [Camelina sativa]	0	10	0	229	2266.68	4.88518e-05		0		0		0	13343849	0.00199271	6.81038e+06	0.00142649
Csa_010428098.1	PREDICTED: cysteine protease inhibitor WSCP-like [Camelina sativa]	0	10	0	229	2266.68	4.88518e-05		0		0		0	13343849	0.00199271	6.81038e+06	0.00142649
Csa_010428108.1	PREDICTED: cysteine protease inhibitor WSCP-like [Camelina sativa]	0	10	0	231	2266.68	4.84289e-05		0		0		0	13343849	0.00197546	6.81038e+06	0.00141414
Csa_010421879.1	PREDICTED: ras-related protein RABG3a-like [Camelina sativa]	0	8	0	206	1876.41	4.4956e-05	1.45626e+07	0.00326212	8.26488e+06	0.00200358	1.74653e+07	0.00329351	24982942	0.00414739	15587582	0.00362949
Csa_010460036.1	PREDICTED: ras-related protein RABG3b [Camelina sativa]	0	8	0	206	1876.41	4.4956e-05	1.45626e+07	0.00326212	8.26488e+06	0.00200358	1.74653e+07	0.00329351	24982942	0.00414739	15587582	0.00362949
Csa_010461685.1	PREDICTED: phosphomethylethanolamine N-methyltransferase-like [Camelina sativa]	0.005	4	0	234	2129.9	4.49231e-05	8.2807e+06	0.00163297		0	2.01614e+07	0.00334699	20032544	0.00292764	2945501	0.000603778
Csa_019083894.1	PREDICTED: elongation factor 1-beta 2-like [Camelina sativa]	0	127	4	225	2040.63	4.47618e-05	2.23492e+08	0.045836	180228114	0.0400017	1.87258e+08	0.0323302	2.64029e+08	0.0401299	1.75461e+08	0.0374052
Csa_010424793.1	PREDICTED: fructose-bisphosphate aldolase 6, cytosolic-like [Camelina sativa]	0	50	0	526	4682.18	4.39328e-05	2.26799e+08	0.0198968	1.4299e+08	0.0135756	2.15937e+08	0.0159474	1.76146e+08	0.0114521	1.17144e+08	0.0106824
Csa_010416943.1	PREDICTED: ras-related protein RABG2 isoform X1 [Camelina sativa]	0	8	0	211	1876.41	4.38907e-05	1.45626e+07	0.00318482	8.26488e+06	0.00195611	1.74653e+07	0.00321547	24982942	0.00404911	15587582	0.00354348
Csa_010498018.1	PREDICTED: ACT domain-containing protein ACR11-like [Camelina sativa]	0	35	5	290	2562.56	4.36116e-05	8.54012e+07	0.0135892	109459202	0.0188492	8.96994e+07	0.0120155	9.91351e+07	0.0116903	7.38567e+07	0.0122159
Csa_010459298.1	PREDICTED: ATPase 10, plasma membrane-type isoform X1 [Camelina sativa]	0	65	0	949	8355.31	4.34533e-05	9.7785e+07	0.00475482	1.59979e+08	0.0084185	1.85176e+08	0.00757997	1.90356e+08	0.00685958	1.31918e+08	0.00666764
Csa_010420346.1	PREDICTED: probable UDP-arabinopyranose mutase 5 [Camelina sativa]	0	9	2	348	3053.43	4.33047e-05	122364676	0.0162258		0	5.59456e+07	0.00624505	89071479	0.00875301	49309393	0.00679648
Csa_010429432.1	PREDICTED: ATPase 5, plasma membrane-type-like [Camelina sativa]	0	48	0	958	8355.31	4.30451e-05	1.2877e+08	0.00620266	9.81534e+07	0.00511656	2.16123e+08	0.00876364	293326535	0.0104709	2.00737e+08	0.0100507
Csa_019094158.1	PREDICTED: LOW QUALITY PROTEIN: ATPase 5, plasma membrane-type [Camelina sativa]	0	48	0	990	8355.31	4.16537e-05	1.2877e+08	0.00600217	9.81534e+07	0.00495118	2.16123e+08	0.00848037	293326535	0.0101324	2.00737e+08	0.00972583
Csa_010509330.1	PREDICTED: histone H2B.8-like [Camelina sativa]	0	67	0	137	1139.18	4.10393e-05	1.46233e+06	0.000492552	2.88091e+06	0.00105014	5460017	0.00154819	5.63558e+06	0.00140675	2.1731e+06	0.000760839
Csa_010508078.1	PREDICTED: uncharacterized protein LOC104784717 [Camelina sativa]	0	10	2	302	2373.56	3.87901e-05	1.11565e+07	0.00170471	1.28599e+07	0.00212652	1.74469e+07	0.0022442	13868178	0.0015704	8.85672e+06	0.0014067
Csa_010507951.1	PREDICTED: 26S proteasome non-ATPase regulatory subunit 6 homolog [Camelina sativa]	0	8	0	331	2566.56	3.82692e-05	26669550	0.00371805	13261380	0.00200078	40808549	0.00478931	64206715	0.00663362	51713006	0.00749386
Csa_010423543.1	PREDICTED: ACT domain-containing protein ACR12 [Camelina sativa]	0	1	1	302	2290.13	3.74266e-05	4.62672e+06	0.000706959	2.31359e+06	0.000382575	5165022	0.000664378	2.32915e+06	0.000263747	2.27602e+06	0.000361495
Csa_010444089.1	PREDICTED: importin subunit alpha-1 [Camelina sativa]	0	6	1	534	4046.96	3.74037e-05	228626	1.97566e-05		0		0	2.16842e+06	0.000138867	20405384	0.00183289
Csa_010432016.1	PREDICTED: heat shock 70 kDa protein 9, mitochondrial [Camelina sativa]	0	68	15	684	5172.87	3.73252e-05	1.68129e+08	0.0113427	8.87701e+07	0.0064811	1.78183e+08	0.0101195	2.28767e+08	0.0114376	1.33755e+08	0.00937967
Csa_010461660.2	PREDICTED: bifunctional D-cysteine desulfhydrase/1-aminocyclopropane-1-carboxylate deaminase, mitochondrial [Camelina sativa]	0	9	5	406	2969.04	3.60925e-05	1.35321e+07	0.00153803	3.89479e+06	0.000479067	1.6762e+07	0.0016038	1.66304e+07	0.0014008	1.42331e+07	0.00168155
Csa_010418609.1	PREDICTED: transcription factor DIVARICATA-like [Camelina sativa]	0.015	11	1	189	1381.15	3.60666e-05		0	741759	0.000195993		0	18509384	0.0033491	9366209	0.00237704
Csa_010494113.1	PREDICTED: GDP-mannose 3,5-epimerase isoform X1 [Camelina sativa]	0	94	15	382	2778.82	3.59024e-05	2.6811e+08	0.0323876	1.96675e+08	0.0257113	2.6626e+08	0.0270765	3.10243e+08	0.0277739	2.55851e+08	0.032126
Csa_010447367.1	PREDICTED: photosynthetic NDH subunit of subcomplex B 3, chloroplastic [Camelina sativa]	0	3	1	169	1183.78	3.45711e-05		0		0	1.33994e+06	0.000307999	2.47381e+06	0.000500585	1.69932e+06	0.000482306
Csa_010435443.1	PREDICTED: proteasome subunit alpha type-6-A [Camelina sativa]	0	15	2	246	1713.81	3.43838e-05	4.14782e+07	0.00778061	1.82503e+07	0.00370487	4.63566e+07	0.00732026	7.30442e+07	0.0101543	4.5971e+07	0.00896361
Csa_010441957.1	PREDICTED: proteasome subunit alpha type-6-B-like isoform X1 [Camelina sativa]	0	6	0	246	1713.81	3.43838e-05	2.1533e+07	0.00403922	8.26007e+06	0.00167682	1.58775e+07	0.00250724	1.22923e+07	0.00170881	9.46806e+06	0.00184612
Csa_010433803.1	PREDICTED: endoplasmin homolog [Camelina sativa]	0	88	13	823	5596.56	3.3562e-05	4.48611e+08	0.0251535	283218340	0.0171854	5.90751e+08	0.0278839	7.61966e+08	0.0316617	5.87063e+08	0.0342152
Csa_010421357.1	PREDICTED: early nodulin-like protein 3 [Camelina sativa]	0	4	2	183	1228.95	3.31443e-05	22254912	0.00561181		0	1.39104e+07	0.00295284	1.5519e+07	0.00290008	1.22945e+07	0.0032225
Csa_010486348.1	PREDICTED: protein OBERON 1-like [Camelina sativa]	0.02	11	1	566	3758.79	3.27761e-05	15931198	0.00129885	1.36387e+07	0.00120336	11196009	0.000768417	18441742	0.00111425	9.25183e+06	0.000784053
Csa_010436032.1	PREDICTED: isoamylase 3, chloroplastic isoform X1 [Camelina sativa]	0	4	2	765	5071.77	3.27208e-05	6.53171e+06	0.000393998		0	9.15158e+06	0.000464712	5.64533e+06	0.000252363	6.19357e+06	0.000388341
Csa_010481180.1	PREDICTED: uncharacterized protein LOC104760026 [Camelina sativa]	0	13	0	390	2459.22	3.11215e-05	2.67086e+07	0.0031602	1.45348e+07	0.00186116	2.91301e+07	0.00290153	4.14323e+07	0.00363306	3.19409e+07	0.0039284
Csa_010453451.1	PREDICTED: magnesium-chelatase subunit ChlH, chloroplastic [Camelina sativa]	0	32	2	1381	8603.06	3.07458e-05	9.28181e+07	0.00310147	2.58809e+07	0.000935888	85538281	0.00240612	76315753	0.00188981	71441877	0.00248138
Csa_010463792.1	PREDICTED: mitochondrial inner membrane protease ATP23-like [Camelina sativa]	0	2	1	194	1207.86	3.07286e-05		0		0	6.14108e+06	0.00122968	7582938	0.0013367	5655276	0.00139825
Csa_010424085.1	PREDICTED: magnesium-chelatase subunit ChlH, chloroplastic-like, partial [Camelina sativa]	0	30	0	1404	8603.06	3.02422e-05	5.87777e+07	0.00193185	2.58809e+07	0.000920557	7.79956e+07	0.00215801	7.36946e+07	0.00179501	67102157	0.00229247
Csa_010412992.1	PREDICTED: calmodulin-2/4-like, partial [Camelina sativa]	0	28	0	195	1188.83	3.00893e-05	5.76818e+07	0.01365	5.77681e+07	0.0147942	9.47391e+07	0.0188732	6.56192e+07	0.0115079	4.57691e+07	0.0112583
Csa_010495044.1	PREDICTED: probable mediator of RNA polymerase II transcription subunit 37c [Camelina sativa]	0	557	0	611	3539.97	2.85947e-05	1481290624	0.111873	960827584	0.0785313	1446608512	0.0919729	1354674816	0.0758214	1382077696	0.108499
Csa_010508760.1	PREDICTED: calmodulin-A-like [Camelina sativa]	0.006	10	0	208	1188.83	2.82087e-05	1.60514e+07	0.00356105	1.14349e+07	0.00274542	3.35513e+07	0.00626609	33958105	0.00558314	2.07611e+07	0.00478763
Csa_010417662.1	PREDICTED: nucleolar GTP-binding protein 1 isoform X1 [Camelina sativa]	0.012	2	2	457	2597.82	2.80556e-05	9039320	0.000912741	1.51294e+06	0.000165328	8.65493e+06	0.000735694	1.00472e+07	0.000751841	9.05959e+06	0.000950881
Csa_010444752.1	PREDICTED: dolichyl-diphosphooligosaccharide--protein glycosyltransferase 48 kDa subunit [Camelina sativa]	0	22	3	437	2459.22	2.77743e-05	7.00402e+07	0.00739596	2.69569e+07	0.00308054	5.19881e+07	0.00462139	8.37361e+07	0.00655284	6.02043e+07	0.00660816
Csa_010466172.1	PREDICTED: mitochondrial import receptor subunit TOM40-1 [Camelina sativa]	0	5	2	308	1714.45	2.74727e-05	1.22055e+07	0.00182866	1.35272e+06	0.000219329	1.57921e+07	0.00199177	15817603	0.00175626	1.3105e+07	0.00204089
Csa_010419868.1	PREDICTED: uncharacterized protein LOC104705550 [Camelina sativa]	0	11	6	636	3534.28	2.74265e-05	1.60335e+08	0.0116332	8121523	0.000637703	1.01642e+07	0.000620823	4.62417e+07	0.00248642	1.99725e+07	0.00150629
Csa_010500197.2	PREDICTED: LOW QUALITY PROTEIN: uncharacterized protein LOC104777614 [Camelina sativa]	0	9	5	507	2714.29	2.64225e-05	1.55382e+07	0.00141424	3.60062e+06	0.000354656	1.49563e+07	0.00114595	2.01493e+07	0.00135909	1.57259e+07	0.00148779
Csa_010456953.1	PREDICTED: uncharacterized protein LOC104738482 [Camelina sativa]	0.021	1	1	694	3536.59	2.51508e-05	79236880	0.00526861	34394116	0.00247493	117084192	0.00655373	142105568	0.00700245	86893984	0.00600571
Csa_010414442.1	PREDICTED: ATP-dependent zinc metalloprotease FTSH 3, mitochondrial [Camelina sativa]	0	2	0	812	4136.93	2.51448e-05	1.81132e+08	0.0102936	1.28985e+08	0.00793271	2.41988e+08	0.0115768	238472176	0.0100434	1.80061e+08	0.0106364
Csa_010475511.1	PREDICTED: ATP-dependent zinc metalloprotease FTSH 10, mitochondrial isoform X1 [Camelina sativa]	0	9	1	815	4136.93	2.50523e-05	1.96919e+08	0.0111496	1.28985e+08	0.00790351	2.41988e+08	0.0115342	247077748	0.0103675	1.92137e+08	0.011308
Csa_010441533.1	PREDICTED: mitochondrial carnitine/acylcarnitine carrier-like protein [Camelina sativa]	0	27	7	300	1519.56	2.4999e-05	5.03349e+07	0.00774241	3.03221e+07	0.00504751	5.75769e+07	0.0074555	1.05959e+08	0.0120786	8.46348e+07	0.013532
Csa_010464885.1	PREDICTED: T-complex protein 1 subunit eta [Camelina sativa]	0	53	14	557	2808.8	2.48881e-05	2.1864e+09	0.181135	1.93849e+09	0.173798	1.19892e+09	0.0836153	1.32821e+09	0.0815475	1.16094e+09	0.0999742
Csa_010416314.1	PREDICTED: NAP1-related protein 1 [Camelina sativa]	0	16	3	258	1299.45	2.48581e-05	1.84772e+07	0.0033048	7.47449e+06	0.00144677	2.40863e+07	0.0036266	3.00598e+07	0.00398441	2.32536e+07	0.0043232
Csa_010505874.1	PREDICTED: calmodulin-2/4 [Camelina sativa]	0	28	0	238	1188.83	2.4653e-05	5.76818e+07	0.0111838	5.77681e+07	0.0121213	9.47391e+07	0.0154633	6.56192e+07	0.00942871	4.57691e+07	0.0092242
Csa_010415631.1	PREDICTED: delta-aminolevulinic acid dehydratase 1, chloroplastic [Camelina sativa]	0	45	9	430	2129.25	2.44391e-05	108111066	0.0116019	4.98616e+07	0.00579077	8.3955e+07	0.00758452	9.13315e+07	0.00726357	7.26757e+07	0.00810689
Csa_019093836.1	PREDICTED: uncharacterized protein LOC104741250 isoform X1 [Camelina sativa]	0	7	4	900	4436.27	2.43278e-05	2.70062e+07	0.00138468	1.42714e+07	0.000791884	1.80028e+07	0.000777047	26297617	0.000999245	1.40271e+07	0.000747585
Csa_010412912.2	PREDICTED: histone H2B.4-like [Camelina sativa]	0	67	0	232	1139.18	2.42344e-05	1.46233e+06	0.000290861	2.88091e+06	0.000620126	5460017	0.000914231	5.63558e+06	0.000830709	2.1731e+06	0.000449289
Csa_019094552.1	PREDICTED: phosphomethylethanolamine N-methyltransferase-like, partial [Camelina sativa]	0	8	0	448	2129.9	2.34643e-05	3.14685e+07	0.00324135	4.42601e+06	0.00049337	3.08946e+07	0.00267889	38856026	0.00296605	1.63591e+07	0.00175152
Csa_010426928.1	PREDICTED: bifunctional enolase 2/transcriptional activator-like [Camelina sativa]	0	101	0	445	2072.85	2.29898e-05	3.37925e+08	0.035042	2.37489e+08	0.0266515	4.10177e+08	0.0358065	5.26462e+08	0.0404581	3.57798e+08	0.0385667
Csa_010433142.1	PREDICTED: 26S proteasome regulatory subunit 4 homolog A [Camelina sativa]	0	28	10	444	1947.12	2.1644e-05	6.46201e+07	0.00671603	2.57645e+07	0.00289786	9.76919e+07	0.00854723	8.89498e+07	0.00685109	6.87468e+07	0.00742682
Csa_010461683.1	PREDICTED: phosphomethylethanolamine N-methyltransferase [Camelina sativa]	0	14	3	492	2129.9	2.13659e-05	6.35868e+07	0.0059639	1.75461e+07	0.00178096	7.044e+07	0.00556166	9.10392e+07	0.00632793	5.34717e+07	0.00521306
Csa_010459153.1	PREDICTED: 1-deoxy-D-xylulose 5-phosphate reductoisomerase, chloroplastic-like [Camelina sativa]	0	46	0	450	1894.51	2.07783e-05	1.61815e+08	0.0165933	1.17255e+08	0.0130124	1.65899e+08	0.0143212	1.94281e+08	0.0147644	1.75563e+08	0.0187135
Csa_010422282.1	PREDICTED: 110 kDa U5 small nuclear ribonucleoprotein component CLO isoform X1 [Camelina sativa]	0	6	5	985	4103.42	2.05607e-05	3.90711e+07	0.00183041	1.13797e+06	5.76942e-05	5.87543e+06	0.000231715	9.67121e+06	0.000335771	1.89611e+07	0.000923337
Csa_010421161.1	PREDICTED: 26S proteasome non-ATPase regulatory subunit 14 homolog [Camelina sativa]	0	30	6	308	1262.5	2.02305e-05	5.22527e+07	0.00782863	2.4124e+07	0.00391145	5.50328e+07	0.00694098	9.50367e+07	0.0105521	4.3214e+07	0.00672988
Csa_010444134.1	PREDICTED: 1-deoxy-D-xylulose 5-phosphate reductoisomerase, chloroplastic-like [Camelina sativa]	0	64	2	478	1894.51	1.95612e-05	2.65772e+08	0.0256572	1.65434e+08	0.0172836	2.10905e+08	0.0171399	2.77767e+08	0.0198724	2.43963e+08	0.024481
Csa_010490798.1	PREDICTED: isocitrate dehydrogenase [NAD] catalytic subunit 5, mitochondrial-like [Camelina sativa]	0	35	4	374	1467.72	1.93686e-05	7.81211e+07	0.00963884	6.92847e+07	0.00925132	7.53961e+07	0.00783118	8.99588e+07	0.00822565	6.82185e+07	0.00874912
Csa_010464149.1	PREDICTED: pectin acetylesterase 12 [Camelina sativa]	0.001	3	1	415	1622.18	1.9292e-05	2.70038e+06	0.000300265	1.41902e+06	0.000170757	3513594	0.000328892	5.72587e+06	0.000471837	4775318	0.000551935
Csa_010431729.1	PREDICTED: puromycin-sensitive aminopeptidase-like [Camelina sativa]	0	8	0	335	1293.06	1.90502e-05	15994232	0.00220316	1.23345e+07	0.00183872	1.44359e+07	0.00167397	2.07411e+07	0.00211731	1.40449e+07	0.00201097
Csa_010471234.1	PREDICTED: patellin-3 [Camelina sativa]	0	9	2	524	2016.19	1.89901e-05	11123577	0.000979583	11924986	0.00113649	15621319	0.00115807	2.83479e+07	0.00185007	1.8932e+07	0.00173301
Csa_010420869.1	PREDICTED: sucrose-phosphate synthase 1 [Camelina sativa]	0	15	5	1043	3831.56	1.81309e-05	2.11858e+07	0.000937322	2.1392e+07	0.00102425	2.0128e+07	0.000749662	1.96945e+07	0.000645741	2.07986e+07	0.000956497
Csa_010421937.1	PREDICTED: UDP-arabinopyranose mutase 3 [Camelina sativa]	0	24	0	356	1278.57	1.77256e-05	152184599	0.0197264	6.44719e+07	0.00904397	118644920	0.0129464	313333558	0.0300992	248675005	0.0335055
Csa_010464631.1	PREDICTED: syntaxin-71-like [Camelina sativa]	0	8	3	265	943.891	1.75793e-05	2.67218e+06	0.000465315	1.05373e+06	0.000198573	2.98402e+06	0.000437427	4.45491e+06	0.000574898	3.03879e+06	0.000550033
Csa_010464666.1	PREDICTED: threonine dehydratase biosynthetic, chloroplastic [Camelina sativa]	0	7	4	591	2040.32	1.70387e-05	21553323	0.00168289	6.37334e+06	0.00053854	1.85121e+07	0.0012168	47277440	0.00273568	2.7898e+07	0.00226422
Csa_010442289.1	PREDICTED: probable UDP-arabinopyranose mutase 4 isoform X1 [Camelina sativa]	0	21	0	378	1278.57	1.66939e-05	9.66871e+07	0.0118033	3.86114e+07	0.00510108	84665307	0.00870089	271487533	0.0245616	210283966	0.0266838
Csa_010466179.1	PREDICTED: T-complex protein 1 subunit alpha [Camelina sativa]	0	55	10	545	1826.92	1.65443e-05	7.1555e+07	0.00605859	2.58117e+07	0.00236515	8.38623e+07	0.00597751	1.04567e+08	0.00656142	6.63549e+07	0.00583996
Csa_010462039.1	PREDICTED: probable mitochondrial-processing peptidase subunit alpha-1, mitochondrial isoform X2 [Camelina sativa]	0	41	4	503	1659.12	1.62794e-05	1.20232e+08	0.0110301	1.35294e+08	0.0134322	1.20527e+08	0.00930822	1.48674e+08	0.010108	1.44959e+08	0.0138233
Csa_010420728.1	PREDICTED: caffeoylshikimate esterase-like [Camelina sativa]	0.005	2	1	331	1050.85	1.56689e-05	4.82478e+06	0.000672633		0	3853309	0.000452226	6985571	0.000721725	8025708	0.00116303
Csa_019093224.1	PREDICTED: WEB family protein At5g16730, chloroplastic [Camelina sativa]	0	21	0	582	1693.53	1.43614e-05	1.79795e+07	0.00142555	1.36089e+07	0.00116772	3.02611e+07	0.00201982	4.54684e+07	0.00267168	3.30663e+07	0.00272519
Csa_010424879.1	PREDICTED: nicotinate-nucleotide pyrophosphorylase [carboxylating], chloroplastic [Camelina sativa]	0	13	3	352	992.004	1.3909e-05	1.67442e+07	0.00219508	1.47045e+07	0.00208616	1.9251e+07	0.00212452	3.90627e+07	0.00379505	2.81087e+07	0.0038303
Csa_010508658.1	PREDICTED: villin-2-like [Camelina sativa]	0	17	6	980	2611.67	1.31528e-05	1.40646e+07	0.000662263	5.43939e+06	0.00027718	1.21189e+07	0.000480382	22019836	0.000768398	1.77897e+07	0.000870717
Csa_010421514.1	PREDICTED: glutamate--tRNA ligase, cytoplasmic [Camelina sativa]	0	22	7	721	1813.67	1.24151e-05	51487675	0.00329531	3.19708e+07	0.00221441	5.5322e+07	0.00298066	8.23038e+07	0.00390376	4.95449e+07	0.00329608
Csa_010414193.1	PREDICTED: aspartate aminotransferase, mitochondrial [Camelina sativa]	0	16	6	432	1073.94	1.22694e-05	5.67579e+07	0.00606277	2.83827e+07	0.00328101	5.31902e+07	0.00478297	7.80596e+07	0.00617932	4.68285e+07	0.00519948
Csa_010498417.1	PREDICTED: ATP sulfurylase 2 [Camelina sativa]	0	12	2	487	1122.52	1.13761e-05	1.2213e+07	0.00115724	1.22107e+07	0.00125213	2.00464e+07	0.00159903	2.53178e+07	0.00177785	16398923	0.00161518
Csa_010424979.1	PREDICTED: glutamate decarboxylase 4 [Camelina sativa]	0	48	0	490	1126.2	1.13435e-05	2.23907e+07	0.00210863	3.10514e+07	0.00316464	3.88877e+07	0.00308294	4.60355e+07	0.00321288	2.33507e+07	0.00228579
Csa_010432138.1	PREDICTED: probable Xaa-Pro aminopeptidase P [Camelina sativa]	0	24	9	646	1480.21	1.13088e-05	4.17125e+07	0.00297963	2.75323e+07	0.00212838	6.05493e+07	0.00364105	5.33173e+07	0.0028225	5.01218e+07	0.00372159
Csa_010422248.1	PREDICTED: pyrophosphate--fructose 6-phosphate 1-phosphotransferase subunit beta 2-like isoform X2 [Camelina sativa]	0	11	0	569	1303.14	1.13033e-05	4.06771e+06	0.000329887	954660	8.37867e-05	5.25488e+06	0.000358757	6.48262e+06	0.000389615	5.20977e+06	0.000439178
Csa_010465834.1	PREDICTED: glutamate decarboxylase 5-like [Camelina sativa]	0	48	0	493	1126.2	1.12744e-05	2.23907e+07	0.0020958	3.10514e+07	0.00314538	3.88877e+07	0.00306418	4.60355e+07	0.00319333	2.33507e+07	0.00227188
Csa_010425737.1	PREDICTED: alpha-glucan phosphorylase 1 [Camelina sativa]	0	44	14	964	2201.16	1.12694e-05	8.3144e+07	0.00397999	5.71996e+07	0.00296315	9.74009e+07	0.00392496	111292413	0.00394809	9.59246e+07	0.00477295
Csa_010420446.1	PREDICTED: glutamate decarboxylase 1-like [Camelina sativa]	0	48	0	505	1126.2	1.10065e-05	2.23907e+07	0.002046	3.10514e+07	0.00307064	3.88877e+07	0.00299137	4.60355e+07	0.00311745	2.33507e+07	0.0022179
Csa_010454415.1	PREDICTED: 5-methyltetrahydropteroyltriglutamate--homocysteine methyltransferase 3, chloroplastic isoform X1 [Camelina sativa]	0	118	0	813	1797.12	1.09097e-05	2.34393e+08	0.013304	1.03274e+08	0.00634362	2.47733e+08	0.0118371	2.14113e+08	0.00900639	2.23401e+08	0.0131804
Csa_010422247.1	PREDICTED: pyrophosphate--fructose 6-phosphate 1-phosphotransferase subunit beta 2-like isoform X1 [Camelina sativa]	0	11	0	594	1303.14	1.08276e-05	4.06771e+06	0.000316003	954660	8.02603e-05	5.25488e+06	0.000343658	6.48262e+06	0.000373217	5.20977e+06	0.000420694
Csa_010444003.1	PREDICTED: staphylococcal nuclease domain-containing protein 1-like isoform X1 [Camelina sativa]	0	49	11	981	1972.25	9.92247e-06	1.18205e+08	0.00556025	4.69579e+07	0.00239044	1.38397e+08	0.00548035	1.50746e+08	0.00525504	1.33212e+08	0.00651342
Csa_010423681.1	PREDICTED: 1,4-alpha-glucan-branching enzyme 2-2, chloroplastic/amyloplastic isoform X1 [Camelina sativa]	0	6	4	812	1586.74	9.64443e-06	9783204	0.000555972	1.03169e+07	0.000634498	12665366	0.000605915	1.40361e+07	0.000591139	13947544	0.000823902
Csa_010420934.1	PREDICTED: T-complex protein 1 subunit beta [Camelina sativa]	0	43	15	527	1005.4	9.41573e-06	1.30964e+08	0.0114675	4.65197e+07	0.00440823	1.0433e+08	0.00769036	1.20925e+08	0.00784703	1.15372e+08	0.0105008
Csa_010478037.1	PREDICTED: uncharacterized protein LOC104757043 isoform X1 [Camelina sativa]	0.001	19	0	1494	2353.76	7.77568e-06	1.73755e+08	0.00536678	4.80987e+08	0.0160776	3.13583e+08	0.00815364	4.05835e+08	0.00928961	2.21226e+08	0.00710263
Csa_010460500.1	PREDICTED: uncharacterized protein LOC104741353 [Camelina sativa]	0.001	19	0	1502	2353.76	7.73426e-06	1.73755e+08	0.00533819	4.80987e+08	0.015992	3.13583e+08	0.00811021	4.05835e+08	0.00924013	2.21226e+08	0.0070648
Csa_010509234.1	PREDICTED: acetyl-coenzyme A carboxylase carboxyl transferase subunit alpha, chloroplastic-like [Camelina sativa]	0	16	6	774	1182.25	7.53865e-06	2.85785e+07	0.00170383	1.54376e+07	0.00099604	4.32671e+07	0.00217154	5.22511e+07	0.00230862	35492727	0.00219954
Csa_010412520.1	PREDICTED: protein transport protein Sec24-like CEF isoform X2 [Camelina sativa]	0.007	2	0	1096	1563.2	7.03931e-06	6218517	0.000261821	4410030	0.000200941	4.33789e+06	0.000153751	4.49186e+06	0.000140157	3.24265e+06	0.000141914
Csa_010425852.1	PREDICTED: protein transport protein Sec24-like CEF [Camelina sativa]	0	3	1	1103	1563.2	6.99463e-06	6.94765e+06	0.000290664	4.66391e+06	0.000211161	4.33789e+06	0.000152775	5.46858e+06	0.00016955	3.24265e+06	0.000141013
Csa_010432725.1	PREDICTED: cellulose synthase A catalytic subunit 1 [UDP-forming] [Camelina sativa]	0.05	2	2	1081	1514.99	6.9169e-06	3225872	0.000137705		0		0		0		0
Csa_019095586.1	PREDICTED: uncharacterized protein LOC104778897 [Camelina sativa]	0.001	19	0	1754	2353.76	6.62307e-06	1.73755e+08	0.00457125	4.80987e+08	0.0136944	3.13583e+08	0.00694501	4.05835e+08	0.00791258	2.21226e+08	0.00604978
Csa_010435515.1	PREDICTED: acetyl-coenzyme A synthetase, chloroplastic/glyoxysomal isoform X1 [Camelina sativa]	0	4	0	743	979.012	6.50318e-06	1.00177e+07	0.000622168	1.29309e+06	8.69117e-05	23656970	0.00123686	28196141	0.00129777	14464094	0.000933762
Csa_010414021.1	PREDICTED: myosin-9-like [Camelina sativa]	0	41	9	1334	1693.53	6.2656e-06	9.49647e+08	0.0328499	4.22748e+07	0.00158258	206681843	0.00601861	5.79237e+08	0.014849	4.56813e+08	0.0164254
Csa_019087462.1	PREDICTED: acetyl-coenzyme A synthetase, chloroplastic/glyoxysomal-like [Camelina sativa]	0	4	0	813	979.012	5.94325e-06	1.00177e+07	0.000568598	1.29309e+06	7.94285e-05	23656970	0.00113036	28196141	0.00118603	14464094	0.000853365
Csa_010426817.1	PREDICTED: clustered mitochondria protein-like [Camelina sativa]	0	10	5	1407	843.295	2.9581e-06	6.73313e+06	0.000220826	3.80294e+06	0.000134978	1.09909e+07	0.000303452	1.40457e+07	0.000341388	1.17558e+07	0.000400768
Csa_010423825.2	PREDICTED: probable mediator of RNA polymerase II transcription subunit 37c [Camelina sativa]	0	582	0	654		0		0		0		0		0		0
Csa_010456365.1	PREDICTED: probable mediator of RNA polymerase II transcription subunit 37c [Camelina sativa]	0	560	0	931		0		0		0		0		0		0
Csa_010446275.1	PREDICTED: probable mediator of RNA polymerase II transcription subunit 37c [Camelina sativa]	0	560	0	632		0		0		0		0		0		0
Csa_010463840.1	PREDICTED: 5-methyltetrahydropteroyltriglutamate--homocysteine methyltransferase 2-like [Camelina sativa]	0	342	1	765		0	1.85246e+06	0.000111742	459421	2.99908e-05	2439761	0.00012389	2.66247e+06	0.00011902	2.09194e+06	0.000131166
Csa_010503529.1	PREDICTED: chaperone protein ClpC2, chloroplastic-like [Camelina sativa]	0	436	5	928		0	4.10474e+07	0.00204111	2.87139e+07	0.00154519	54253587	0.00227107	6.97558e+07	0.00257057	47615925	0.00246115
Csa_010464591.1	PREDICTED: heat shock 70 kDa protein 3 [Camelina sativa]	0	529	3	649		0	5.40063e+06	0.000383997	1.23299e+06	9.48757e-05	1.87376e+06	0.000112155		0	1.19501e+06	8.83206e-05
Csa_010465032.1	PREDICTED: probable mediator of RNA polymerase II transcription subunit 37c [Camelina sativa]	0	412	2	650		0	3.32203e+07	0.00235841	3.65055e+07	0.00280468	22712605	0.00135739	2.02301e+07	0.00106434	7.8021e+06	0.000575748
Csa_010422683.1	PREDICTED: S-adenosylmethionine synthase [Camelina sativa]	0	178	8	393		0	1.83762e+08	0.021577	1.10317e+08	0.0140181	2.00028e+08	0.0197719	1.36564e+08	0.0118835	1.02693e+08	0.0125337
Csa_010501783.1	PREDICTED: 14-3-3-like protein GF14 phi [Camelina sativa]	0	183	6	276		0	9.65801e+07	0.0161475	5.16934e+07	0.00935329	1.18781e+08	0.0167181	1.6664e+08	0.0206475	1.30812e+08	0.0227338
Csa_010433017.1	PREDICTED: ATPase 2, plasma membrane-type [Camelina sativa]	0	158	0	948		0		0		0		0		0		0
Csa_010415743.1	PREDICTED: glutamate--glyoxylate aminotransferase 2-like [Camelina sativa]	0	184	5	479		0	2.80575e+07	0.00270297	35279985	0.00367817	3.81646e+07	0.0030951	3.74678e+07	0.00267498	35043408	0.00350917
Csa_010428965.1	PREDICTED: peroxisomal (S)-2-hydroxy-acid oxidase GLO1-like [Camelina sativa]	0	395	5	369		0	1.13077e+07	0.00141409	3.76898e+06	0.000510077	1.8168e+07	0.00191263	1.60913e+07	0.00149129	1.33789e+07	0.00173912
Csa_010416813.1	PREDICTED: 14-3-3-like protein GF14 omega [Camelina sativa]	0	207	5	262		0	1.41026e+08	0.0248385	4.40355e+07	0.00839345	9.02181e+07	0.0133765	1.58289e+08	0.0206608	1.12825e+08	0.0206557
Csa_010446135.1	PREDICTED: heat shock protein 90-3-like [Camelina sativa]	0	168	2	437		0	2.28334e+07	0.00241112	1.64566e+07	0.0018806	22561031	0.00200552	1.74681e+07	0.00136698	12030148	0.00132045
Csa_010511351.1	PREDICTED: probable elongation factor 1-gamma 2 [Camelina sativa]	0	152	8	414		0	4.3987e+08	0.0490288	2.55135e+08	0.0307757	4.49692e+08	0.0421954	5.00872e+08	0.0413737	3.52063e+08	0.04079
Csa_010422840.1	PREDICTED: 14-3-3-like protein GF14 lambda isoform X1 [Camelina sativa]	0	104	8	248		0	2.66181e+08	0.0495284	1.41291e+08	0.0284512	2.27711e+08	0.0356682	2.28063e+08	0.0314486	1.93373e+08	0.0374005
Csa_010435053.1	PREDICTED: cysteine synthase 1-like [Camelina sativa]	0	109	1	322		0	3.65438e+06	0.000523703	15946525	0.00247314	1.52861e+06	0.000184413		0	10296077	0.00153373
Csa_010451233.1	PREDICTED: chaperonin 60 subunit beta 3, chloroplastic [Camelina sativa]	0	612	2	598		0	1.02233e+07	0.000788895	2.88463e+06	0.000240895	9.52261e+06	0.000618592	1.07327e+07	0.000613771	7.64886e+06	0.000613521
Csa_010463089.1	PREDICTED: 14-3-3-like protein GF14 kappa isoform X1 [Camelina sativa]	0	136	4	257		0	3.69446e+07	0.00663355	1.63578e+07	0.00317856	4.41559e+07	0.0066743	8.33545e+07	0.0110916	6.21411e+07	0.0115979
Csa_010464637.1	PREDICTED: adenosine kinase 1-like [Camelina sativa]	0	215	5	344		0	5.08812e+08	0.0682539	2.99349e+08	0.0434568	468460904	0.0529011	7.12677e+08	0.0708488	4.7434e+08	0.0661402
Csa_010437669.1	PREDICTED: polyadenylate-binding protein 2-like [Camelina sativa]	0	91	22	633		0	2.85173e+08	0.020789	1.24031e+08	0.00978506	3.12776e+08	0.0191946	3.13419e+08	0.0169324	2.58522e+08	0.0195897
Csa_010414217.1	PREDICTED: oxygen-evolving enhancer protein 2-1, chloroplastic [Camelina sativa]	0	728	1	263		0	54892676	0.00963134	27734156	0.0052662	78117240	0.0115383	56106640	0.00729553	60578556	0.0110483
Csa_010504960.1	PREDICTED: tubulin beta chain-like [Camelina sativa]	0	149	0	446		0		0		0		0		0		0
Csa_010459680.1	PREDICTED: tubulin beta-5 chain [Camelina sativa]	0	164	3	449		0	130361766	0.0133978	84796123	0.00943122	1.28587e+08	0.011125	168610751	0.0128421	1.31012e+08	0.0139959
Csa_010434259.1	PREDICTED: tubulin beta-9 chain [Camelina sativa]	0	131	1	444		0	36305539	0.00377327	2.34586e+07	0.0026385	4.50101e+07	0.00393801	58053525	0.0044714	4.02769e+07	0.00435117
Csa_010467981.2	PREDICTED: UTP--glucose-1-phosphate uridylyltransferase 2 [Camelina sativa]	0	112	3	407		0	4.59294e+07	0.00520744	3.69016e+07	0.00452782	94090045	0.00898047	8.43468e+07	0.00708716	7.05552e+07	0.00831512
Csa_010420793.1	PREDICTED: tubulin alpha-3 chain [Camelina sativa]	0	261	3	450		0	166419476	0.0170655	129491075	0.0143703	170331852	0.0147039	140234126	0.0106571	132833878	0.0141589
Csa_010426959.1	PREDICTED: cell division control protein 48 homolog D-like [Camelina sativa]	0	83	2	810		0	19320703	0.00110069	11786656	0.000726681	24345115	0.00116755	2.72033e+07	0.00114851	19225054	0.00113846
Csa_010457767.1	PREDICTED: ATP-dependent zinc metalloprotease FTSH 8, chloroplastic isoform X1 [Camelina sativa]	0	94	3	698		0	3.58463e+06	0.000236983	2.72529e+06	0.000194982	3.59047e+06	0.000199823	1.54519e+07	0.000757052	1.68563e+07	0.00115836
Csa_010467089.1	PREDICTED: aconitate hydratase 2, mitochondrial [Camelina sativa]	0	71	4	994		0	4.89943e+07	0.00227451	2.05043e+07	0.00103014	4.04126e+07	0.00157936	4.27499e+07	0.00147078	3.05844e+07	0.00147587
Csa_010460287.1	PREDICTED: eukaryotic translation initiation factor 5A-2 [Camelina sativa]	0	97	3	159		0	5.28566e+08	0.153402	2.40921e+08	0.0756687	3.05741e+08	0.0746976	3.01925e+08	0.0649382	2.61781e+08	0.0789724
Csa_010479017.1	PREDICTED: fructose-1,6-bisphosphatase, cytosolic [Camelina sativa]	0	230	11	341		0	3.00676e+08	0.0406885	392523940	0.0574844	4.00394e+08	0.0456124	4.69384e+08	0.047073	3.37709e+08	0.0475032
Csa_010443420.1	PREDICTED: ATPase 3, plasma membrane-type [Camelina sativa]	0	106	6	949		0	2.87491e+07	0.00139793	9313340	0.000490092	2.5861e+07	0.00105859	1.27981e+07	0.000461187	1.76348e+07	0.000891332
Csa_010441277.1	PREDICTED: heat shock 70 kDa protein 7, chloroplastic [Camelina sativa]	0	354	5	719		0	6.68252e+07	0.00428884	8.50065e+07	0.00590421	1.08554e+08	0.005865	9.57232e+07	0.00455288	7.56866e+07	0.00504922
Csa_010452360.1	PREDICTED: assimilatory sulfite reductase (ferredoxin), chloroplastic [Camelina sativa]	0	44	13	644		0	1.70318e+08	0.012204	7.22761e+07	0.00560463	1.615e+08	0.00974175	1.79394e+08	0.00952621	1.24084e+08	0.00924192
Csa_010463599.1	PREDICTED: probable mitochondrial-processing peptidase subunit beta, mitochondrial isoform X1 [Camelina sativa]	0	55	1	531		0	1.49392e+08	0.0129826	8.0859e+07	0.00760453	1.41263e+08	0.0103343	1.56241e+08	0.0100623	1.2837e+08	0.0115958
Csa_010442169.1	PREDICTED: 60S ribosomal protein L3-1 [Camelina sativa]	0	99	3	391		0	4601970	0.000543119		0	2.7167e+06	0.000269907	6.57922e+06	0.000575434	2.32518e+06	0.000285242
Csa_010414978.1	PREDICTED: calreticulin-1-like isoform X1 [Camelina sativa]	0	71	1	419		0	21105660	0.00232441	14844131	0.00176921	24409768	0.00226308	15414523	0.0012581	15002560	0.00171745
Csa_010470465.1	PREDICTED: cytosolic isocitrate dehydrogenase [NADP]-like isoform X2 [Camelina sativa]	0	91	0	425		0	2.38705e+08	0.0259179	1.04129e+08	0.0122355	1.89618e+08	0.0173317	2.43637e+08	0.0196043	2.13591e+08	0.0241061
Csa_010479432.2	PREDICTED: tubulin beta-1 chain-like [Camelina sativa]	0	117	1	407		0	4.16662e+06	0.000472408	3.08336e+06	0.000378328	10837293	0.00103437	11823670	0.000993473	6.57131e+06	0.000774447
Csa_010427644.1	PREDICTED: adenylosuccinate synthetase, chloroplastic [Camelina sativa]	0	46	12	491		0	1.23331e+08	0.011591	7.56744e+07	0.00769672	1.36046e+08	0.0107636	1.33658e+08	0.0093092	9.338e+07	0.00912234
Csa_010477226.1	PREDICTED: tubulin beta-5 chain-like [Camelina sativa]	0	118	0	450		0	32520232	0.0033348	11021548	0.00122312	1.21066e+07	0.0010451	9248107	0.000702811	9.72335e+06	0.00103642
Csa_010495848.1	PREDICTED: lipoxygenase 2, chloroplastic-like [Camelina sativa]	0	66	7	898		0	3.59153e+07	0.00184557	1.98917e+07	0.0011062	4.31563e+07	0.00186688	6.17368e+07	0.00235107	48949824	0.00261462
Csa_019101544.1	PREDICTED: calreticulin-1-like isoform X2 [Camelina sativa]	0	64	0	438		0		0		0		0		0		0
Csa_010448675.1	PREDICTED: cystine lyase CORI3-like [Camelina sativa]	0	190	5	423		0	296980337	0.0323978	4.46857e+07	0.00527554	253261064	0.0232583	5.50862e+08	0.0445349	1.92526e+08	0.0218314
Csa_010426151.1	PREDICTED: alpha-glucan phosphorylase 2, cytosolic isoform X1 [Camelina sativa]	0	60	12	841		0	8.51139e+07	0.00467017	7.80193e+07	0.00463281	1.2679e+08	0.0058565	8.05972e+07	0.00327735	5.81379e+07	0.00331587
Csa_010435439.1	PREDICTED: 40S ribosomal protein S3-3-like [Camelina sativa]	0	220	1	248		0	9387725	0.00174677	3.57894e+06	0.000720677	16399244	0.00256875	19069242	0.00262954	18072518	0.00349543
Csa_010470627.1	PREDICTED: probable lactoylglutathione lyase, chloroplastic isoform X1 [Camelina sativa]	0	131	7	354		0	2.18376e+08	0.0284662	2.53347e+08	0.0357397	1.98484e+08	0.0217807	2.21504e+08	0.0213982	1.60811e+08	0.0217895
Csa_010444259.1	PREDICTED: glutamate-1-semialdehyde 2,1-aminomutase 1, chloroplastic [Camelina sativa]	0	231	4	473		0	6.7533e+07	0.00658845	5.30632e+07	0.00560236	7.45444e+07	0.00612215	1.26493e+08	0.00914541	7.16921e+07	0.00727016
Csa_010416238.1	PREDICTED: 60S ribosomal protein L6-3 [Camelina sativa]	0	101	8	233		0	1.45394e+08	0.0287951	5.60595e+07	0.0120152	1.37589e+08	0.0229392	2.0045e+08	0.0294204	1.27721e+08	0.026293
Csa_010439990.1	PREDICTED: H/ACA ribonucleoprotein complex subunit 1 [Camelina sativa]	0	70	10	390		0	1.16799e+08	0.0138199	6.99028e+07	0.00895094	1.15652e+08	0.0115196	1.37133e+08	0.0120247	1.0883e+08	0.013385
Csa_010435035.1	PREDICTED: beta-amylase 5 [Camelina sativa]	0	128	12	498		0	1.22584e+08	0.0113588	140827576	0.014122	2.37491e+08	0.0185254	1.65585e+08	0.0113707	1.2207e+08	0.0117575
Csa_010459128.1	PREDICTED: 40S ribosomal protein S12-1 [Camelina sativa]	0	268	1	143		0	2.75492e+07	0.00889	1.54101e+07	0.00538155	39660452	0.0107739	57404620	0.0137281	5.3534e+07	0.0179568
Csa_010456986.1	PREDICTED: protein translocase subunit SECA1, chloroplastic-like [Camelina sativa]	0	50	1	990		0	1.3404e+06	6.2478e-05	1.52659e+07	0.00077006	5.76254e+06	0.000226115	4.42917e+06	0.000152998	2.22688e+06	0.000107894
Csa_010443979.1	PREDICTED: probable mitochondrial-processing peptidase subunit beta, mitochondrial isoform X2 [Camelina sativa]	0	52	0	535		0	1.38896e+08	0.0119802	8.0859e+07	0.00754768	1.22552e+08	0.00889852	1.48245e+08	0.00947597	1.20756e+08	0.0108265
Csa_010432371.1	PREDICTED: peptidyl-prolyl cis-trans isomerase-like [Camelina sativa]	0	70	6	171		0	7.58726e+07	0.0204747	6.8361e+07	0.0199641	8.1739e+07	0.0185688	89062223	0.0178113	5.0071e+07	0.0140451
Csa_010427594.1	PREDICTED: probable glucan endo-1,3-beta-glucosidase BG3 [Camelina sativa]	0	102	5	342		0	1.23544e+08	0.0166696	1.36832e+08	0.0199802	2.24137e+08	0.0254587	2.49461e+08	0.0249445	1.23273e+08	0.0172892
Csa_010452203.1	PREDICTED: adenosine kinase 2-like [Camelina sativa]	0	150	1	345		0	358807	4.79921e-05	2.4382e+06	0.00035293	1.82912e+06	0.000205955		0		0
Csa_010462211.1	PREDICTED: phosphoenolpyruvate carboxylase 1 isoform X1 [Camelina sativa]	0	201	1	967		0	3.65662e+06	0.000174494		0	2733775	0.000109821	2.34798e+06	8.30359e-05	2251548	0.000111683
Csa_010417704.1	PREDICTED: pyrophosphate-energized vacuolar membrane proton pump 1-like [Camelina sativa]	0	60	0	769		0	3.05783e+08	0.0183491	2.39373e+08	0.0155449	2.80482e+08	0.0141687	3.44368e+08	0.0153142	2.94041e+08	0.0183407
Csa_010426881.1	PREDICTED: ubiquitin-60S ribosomal protein L40-2 [Camelina sativa]	0	447	1	128		0	855924	0.00030857	59112.2	2.30625e-05	616467	0.00018709		0	587493	0.000220154
Csa_010509456.1	PREDICTED: pyruvate kinase 1, cytosolic-like [Camelina sativa]	0	62	2	527		0	4.55423e+06	0.00039878	2.86981e+06	0.000271945	1.14101e+07	0.000841061	1.12012e+07	0.00072686	6.38251e+06	0.000580918
Csa_010414799.1	PREDICTED: 60S ribosomal protein L21-1-like isoform X1 [Camelina sativa]	0	42	5	164		0	2.81096e+08	0.0790931	1.68007e+08	0.0511591	271451770	0.0642982	2.69859e+08	0.0562718	354115709	0.10357
Csa_010506734.1	PREDICTED: S-adenosylmethionine synthase 2-like [Camelina sativa]	0	116	2	391		0	9.68154e+06	0.0011426	4.00291e+06	0.000511255	9.27811e+06	0.000921792	1.15649e+07	0.0010115	9.32503e+06	0.00114395
Csa_010479473.1	PREDICTED: alanine--tRNA ligase [Camelina sativa]	0	56	3	1006		0	1.06483e+07	0.000488438	5.08685e+06	0.000252516	4.88304e+06	0.000188557	1.55227e+07	0.000527674	1.06766e+07	0.000509061
Csa_010463663.1	PREDICTED: 14-3-3-like protein GF14 nu [Camelina sativa]	0	121	2	265		0	1.59585e+07	0.0027789	7980819	0.00150397	1.89875e+07	0.00278338	27308218	0.00352408	23899854	0.00432597
Csa_010473202.1	PREDICTED: uncharacterized protein LOC104752695 [Camelina sativa]	0	40	0	1039		0	1.35522e+08	0.00601898	9.57348e+07	0.00460143	1.18195e+08	0.00441909	2.03935e+08	0.00671235	145024003	0.00669512
Csa_010440740.1	PREDICTED: aconitate hydratase 2, mitochondrial isoform X1 [Camelina sativa]	0	52	1	981		0	10182658	0.000478983	720753	3.66907e-05	4.15674e+06	0.000164601	7.5126e+06	0.00026189	6.95883e+06	0.000340253
Csa_010433886.1	PREDICTED: cystine lyase CORI3-like [Camelina sativa]	0	176	2	420		0	5.4456e+07	0.00598307	3.34382e+06	0.000397587	38408846	0.00355248	4.67817e+07	0.00380912	24954326	0.00284991
Csa_010465754.1	PREDICTED: dihydrolipoyl dehydrogenase 2, mitochondrial-like isoform X2 [Camelina sativa]	0	85	5	507		0	1.96757e+07	0.00179081	1.71336e+06	0.000168764	1.11155e+07	0.000851666	2.20281e+07	0.00148582	1.18282e+07	0.00111904
Csa_010466021.1	PREDICTED: protein TIC 62, chloroplastic-like [Camelina sativa]	0	35	0	775		0		0		0		0		0		0
Csa_010431895.1	PREDICTED: glycine-rich RNA-binding protein 8-like isoform X1 [Camelina sativa]	0	63	1	167		0	2.88624e+07	0.00797525	8.74679e+06	0.0026156	4.09351e+07	0.00952203	4.56642e+07	0.00935098	41020022	0.0117818
Csa_010456601.1	PREDICTED: 4-hydroxy-3-methylbut-2-en-1-yl diphosphate synthase (ferredoxin), chloroplastic [Camelina sativa]	0	56	13	743		0	8.05785e+07	0.00500447	2.87395e+07	0.00193165	7.23105e+07	0.00378061	9.18013e+07	0.00422531	6.79098e+07	0.00438407
Csa_010414582.1	PREDICTED: superoxide dismutase [Cu-Zn] 2, chloroplastic [Camelina sativa]	0	27	6	217		0	6.18472e+07	0.0131519	3.98612e+07	0.00917338	7.83356e+07	0.0140233	9.48932e+07	0.0149545	8.75042e+07	0.0193421
Csa_010497708.1	PREDICTED: calvin cycle protein CP12-1, chloroplastic-like [Camelina sativa]	0	34	3	125		0	1.9667e+08	0.0726033	9.44901e+07	0.0377498	8.40649e+07	0.0261249	8.24618e+07	0.0225601	8.35829e+07	0.0320731
Csa_010427174.1	PREDICTED: glutathione reductase, chloroplastic [Camelina sativa]	0	37	11	563		0	1.02703e+08	0.00841792	1.21079e+08	0.0107399	1.38547e+08	0.00955958	1.78705e+08	0.0108549	1.32133e+08	0.0112573
Csa_010484904.1	PREDICTED: 60S ribosomal protein L3-1-like [Camelina sativa]	0	44	0	232		0	1.38331e+08	0.0275144	5.17586e+07	0.0111412	1.34877e+08	0.0225839	1.08996e+08	0.0160665	1.03364e+08	0.0213706
Csa_010450205.1	PREDICTED: 3-isopropylmalate dehydratase large subunit, chloroplastic [Camelina sativa]	0	43	12	513		0	1.41522e+08	0.0127302	2.01021e+08	0.0195688	2.18757e+08	0.0165651	1.66254e+08	0.0110829	1.59464e+08	0.01491
Csa_010432528.1	PREDICTED: LL-diaminopimelate aminotransferase, chloroplastic [Camelina sativa]	0	65	2	462		0	1.05344e+07	0.00105219	7.98675e+06	0.000863309	14247413	0.00119796	10583357	0.000783393	9675132	0.0010045
Csa_010441650.1	PREDICTED: magnesium-chelatase subunit ChlI-2, chloroplastic [Camelina sativa]	0	49	2	420		0	1922249	0.000211197	1.0239e+07	0.00121744	1.09753e+07	0.00101512	14892373	0.00121259	1.0079e+07	0.00115107
Csa_010500615.1	PREDICTED: formate--tetrahydrofolate ligase [Camelina sativa]	0	48	5	634		0	1.39051e+08	0.0101208	5.3751e+07	0.00423385	2.45202e+08	0.015024	1.43377e+08	0.00773373	1.36941e+08	0.0103605
Csa_010465563.1	PREDICTED: phospholipase D alpha 1-like [Camelina sativa]	0	26	9	810		0	3.57625e+07	0.00203737	1.24156e+07	0.000765457	4.1652e+07	0.00199756	4.4037e+07	0.00185922	4.23049e+07	0.00250518
Csa_010413104.1	PREDICTED: calvin cycle protein CP12-1, chloroplastic-like [Camelina sativa]	0	35	1	112		0	6.07692e+06	0.00250377	5295609	0.00236122	3.05995e+06	0.00106132	7.29924e+06	0.00222873	4.58631e+06	0.00196417
Csa_010420443.1	PREDICTED: UTP--glucose-1-phosphate uridylyltransferase 1 [Camelina sativa]	0	42	0	469		0		0		0		0		0		0
Csa_010453428.1	PREDICTED: ADP,ATP carrier protein 2, mitochondrial [Camelina sativa]	0	178	3	394		0	40327269	0.00472314	7.15116e+07	0.00906398	5.31572e+07	0.00524102	1.34869e+07	0.00117062	1.43396e+07	0.00174573
Csa_010460963.1	PREDICTED: ubiquitin-NEDD8-like protein RUB2 [Camelina sativa]	0	228	3	156		0	29470672	0.00871753	20257696	0.00648491	18459841	0.00459677	2.91841e+07	0.00639763	22372263	0.0068789
Csa_010421843.1	PREDICTED: nucleoside diphosphate kinase 1 [Camelina sativa]	0	88	5	149		0	4.82783e+08	0.149518	3.44235e+08	0.115374	6.06585e+08	0.158145	8.51051e+08	0.195329	6.2547e+08	0.201351
Csa_010472637.1	PREDICTED: glycine dehydrogenase (decarboxylating) 2, mitochondrial-like [Camelina sativa]	0	50	2	1046		0	4747571	0.000209444		0	6375540	0.000236775	8000266	0.00026156	4.69127e+06	0.000215126
Csa_019092905.1	PREDICTED: succinate--CoA ligase [ADP-forming] subunit beta, mitochondrial [Camelina sativa]	0	81	14	444		0	1.82053e+08	0.018921	1.06798e+08	0.0120121	1.98121e+08	0.017334	2.68984e+08	0.0207177	2.06766e+08	0.0223373
Csa_010434651.1	PREDICTED: ras-related protein RABD2c [Camelina sativa]	0	63	4	202		0	2.10211e+08	0.0480211	1.17953e+08	0.0291607	2.59578e+08	0.0499191	3.1211e+08	0.0528389	231624501	0.0550005
Csa_010431896.1	PREDICTED: glycine-rich RNA-binding protein 8-like isoform X2 [Camelina sativa]	0	58	0	143		0	1.418e+07	0.00457581	6.41033e+06	0.00223863	1.42874e+07	0.0038812	3.2799e+07	0.00784373	30913830	0.0103693
Csa_010440655.1	PREDICTED: glycine--tRNA ligase, mitochondrial 1 isoform X1 [Camelina sativa]	0	54	11	660		0	1.05003e+08	0.00734148	5.95795e+07	0.00450808	1.14363e+08	0.00673121	1.59851e+08	0.00828266	1.12833e+08	0.00820026
Csa_010505953.1	PREDICTED: NADPH-dependent thioredoxin reductase 3 [Camelina sativa]	0	59	4	523		0	9.04288e+07	0.00797872	9.44918e+07	0.00902258	1.31946e+08	0.00980042	1.40075e+08	0.00915919	1.05756e+08	0.0096992
Csa_010490186.1	PREDICTED: leucine--tRNA ligase, cytoplasmic [Camelina sativa]	0	28	8	1087		0	9.31057e+07	0.00395253	3.73449e+07	0.00171569	4.47737e+07	0.00160009	8.75926e+07	0.00275573	5.66305e+07	0.00249893
Csa_019088358.1	PREDICTED: ATPase 11, plasma membrane-type isoform X1 [Camelina sativa]	0	72	2	959		0	5.40913e+06	0.000260278	2.2754e+06	0.000118489	1.08512e+07	0.000439552	1.84553e+07	0.000658114	11204688	0.000560422
Csa_010462633.1	PREDICTED: probable 2,3-bisphosphoglycerate-independent phosphoglycerate mutase 2 [Camelina sativa]	0	76	6	560		0	6.14963e+07	0.00506745	2.8935e+07	0.00258032	5.13919e+07	0.00356497	6.89885e+07	0.00421295	4.98498e+07	0.00426982
Csa_019090053.1	PREDICTED: UTP--glucose-1-phosphate uridylyltransferase 1-like [Camelina sativa]	0	41	1	452		0	1.33797e+06	0.000136595		0		0	2.80432e+06	0.000212172		0
Csa_010487495.1	PREDICTED: GDSL esterase/lipase APG-like [Camelina sativa]	0	50	11	366		0	7.4614e+07	0.00940735	4.8579e+07	0.00662836	8.73631e+07	0.0092725	1.11102e+08	0.010381	7.86704e+07	0.0103101
Csa_010506799.1	PREDICTED: 60S ribosomal protein L7a-1-like [Camelina sativa]	0	124	2	248		0	3.35037e+07	0.00623404	2.03538e+07	0.00409856	2.30546e+07	0.00361123	3.21193e+07	0.00442907	1.94665e+07	0.00376505
Csa_010413922.1	PREDICTED: elongation factor 1-delta 2 [Camelina sativa]	0	88	1	230		0	4.54215e+06	0.000911302	5.7776e+06	0.00125446	8.59884e+06	0.00145232	1.38106e+07	0.00205345	6.62049e+06	0.00138069
Csa_010425245.1	PREDICTED: dihydrolipoyllysine-residue acetyltransferase component 4 of pyruvate dehydrogenase complex, chloroplastic [Camelina sativa]	0	48	9	484		0	9.44149e+07	0.00900167	7.07694e+07	0.00730195	1.05168e+08	0.0084409	1.39392e+08	0.00984896	8.75304e+07	0.00867456
Csa_010515072.1	PREDICTED: uncharacterized protein LOC104790970 [Camelina sativa]	0	25	2	136		0	1.96946e+07	0.00668246	1.61574e+07	0.00593296	3.17636e+07	0.00907279	3.3166e+07	0.00833974	2.90697e+07	0.0102527
Csa_010465700.1	PREDICTED: 60S ribosomal protein L19-2 [Camelina sativa]	0	93	1	314		0	994321	0.000146125		0	1.47283e+06	0.000182211	2.45599e+06	0.000267482	977420	0.000149309
Csa_010459335.1	PREDICTED: 1-deoxy-D-xylulose 5-phosphate reductoisomerase, chloroplastic [Camelina sativa]	0	50	1	479		0	8462221	0.000815224	8974431	0.000935642	9931249	0.000805412	13996253	0.00099925	8.33855e+06	0.000835005
Csa_010465600.1	PREDICTED: MAR-binding filament-like protein 1 isoform X1 [Camelina sativa]	0	37	13	725		0	9.19662e+07	0.00585354	5.88189e+07	0.00405152	9.20652e+07	0.00493296	1.26638e+08	0.00597345	8.77865e+07	0.00580796
Csa_010505440.1	PREDICTED: pyridoxal 5'-phosphate synthase subunit PDX1.1 [Camelina sativa]	0	69	5	310		0	1.46874e+07	0.00218631	1.09466e+07	0.00176341	21526669	0.00269752	2.90649e+07	0.00320631	1.73339e+07	0.00268206
Csa_010427451.1	PREDICTED: 40S ribosomal protein S26-3 [Camelina sativa]	0	54	2	130		0	1.09424e+06	0.000388416	501917	0.000192809	447538	0.000133732	1.61602e+06	0.00042511	841299	0.000310414
Csa_010459142.1	PREDICTED: heat shock 70 kDa protein 5-like [Camelina sativa]	0	149	1	650		0		0		0		0		0		0
Csa_010456019.1	PREDICTED: translocase of chloroplast 159, chloroplastic isoform X1 [Camelina sativa]	0	45	12	1525		0	6.84411e+07	0.00207098	3.88163e+07	0.00127111	9.77395e+07	0.00248972	1.40376e+08	0.0031479	102444756	0.00322221
Csa_010459273.1	PREDICTED: heme-binding protein 2-like [Camelina sativa]	0	25	7	234		0	6.16918e+07	0.0121658	6.33614e+07	0.0135222	8.26436e+07	0.0137197	8.06647e+07	0.0117887	5.48692e+07	0.0112473
Csa_010507887.1	PREDICTED: protein disulfide-isomerase like 2-1 [Camelina sativa]	0	34	2	363		0	1.3292e+08	0.0168971	4.26216e+07	0.00586357	9.39892e+07	0.0100582	1.16048e+08	0.0109328	6.00722e+07	0.00793781
Csa_010441580.1	PREDICTED: 60S ribosomal protein L32-1 [Camelina sativa]	0	41	2	133		0	36673375	0.0127241	1.95641e+07	0.00734591	52482979	0.0153291	89342494	0.0229723	53555153	0.0193145
Csa_010511498.1	PREDICTED: ATP-dependent Clp protease proteolytic subunit 3, chloroplastic [Camelina sativa]	0	17	4	309		0	58323607	0.00870992	2.03402e+07	0.00328726	5.01782e+07	0.00630822	4.83534e+07	0.0053514	40354693	0.00626426
Csa_010442688.1	PREDICTED: phosphoglucomutase, chloroplastic [Camelina sativa]	0	63	10	623		0	5.98011e+07	0.00442945	6.10302e+07	0.0048921	9.2159e+07	0.00574645	1.02219e+08	0.00561101	6.84159e+07	0.00526748
Csa_010443869.1	PREDICTED: 60S ribosomal protein L12-3 [Camelina sativa]	0	288	2	166		0	8116329	0.00225621	1.93769e+06	0.000582927	5.00221e+06	0.00117059	6.29399e+06	0.00129663	5.85659e+06	0.00169227
Csa_019088701.1	PREDICTED: haloacid dehalogenase-like hydrolase domain-containing protein At4g39970 isoform X1 [Camelina sativa]	0	19	1	320		0	1994360	0.000287595	9115086	0.00142249	5.08399e+06	0.00061717	2.58684e+06	0.000276451		0
Csa_010506329.1	PREDICTED: methylenetetrahydrofolate reductase 2 [Camelina sativa]	0	40	4	594		0	1.28312e+07	0.000996801	4245728	0.000356947	1.37439e+07	0.000898821	1.26411e+07	0.000727775	7.82877e+06	0.00063218
Csa_010476874.1	PREDICTED: alanine aminotransferase 1, mitochondrial-like [Camelina sativa]	0	39	6	548		0	3.58989e+07	0.00302294	6.05869e+07	0.00552124	5.54261e+07	0.00392901	6.38974e+07	0.0039875	4.40268e+07	0.00385363
Csa_010438597.1	PREDICTED: early nodulin-like protein 2 [Camelina sativa]	0	48	7	363		0	1.2013e+08	0.0152712	1.05006e+08	0.0144459	1.61989e+08	0.0173351	1.76234e+08	0.0166028	1.64106e+08	0.0216847
Csa_010491456.1	PREDICTED: succinate--CoA ligase [ADP-forming] subunit alpha-1, mitochondrial [Camelina sativa]	0	20	3	348		0	5.79379e+07	0.00768266	3.79324e+07	0.0054434	3.71333e+07	0.0041451	3.57205e+07	0.00351024	2.78929e+07	0.00384458
Csa_010427802.1	PREDICTED: spermidine synthase 2 [Camelina sativa]	0	82	4	346		0	2.12047e+07	0.00282803	2.59979e+06	0.000375233	2.39992e+07	0.00269445	24720881	0.00244335	2.20249e+07	0.00305332
Csa_019083388.1	PREDICTED: defensin-like protein 1 [Camelina sativa]	0	247	2	90		0	2.95691e+08	0.151608	2.85779e+08	0.158572	4.90775e+08	0.211831	4.59933e+08	0.174763	4.57893e+08	0.244037
Csa_010505306.1	PREDICTED: 40S ribosomal protein S5-1 [Camelina sativa]	0	81	1	207		0	52172950	0.0116306	40813900	0.00984637	58804451	0.0110354	49424325	0.00816523	2.76636e+07	0.00641021
Csa_010506432.1	PREDICTED: thylakoid lumenal 15 kDa protein 1, chloroplastic [Camelina sativa]	0	23	4	226		0	4.31859e+07	0.00881783	3.62379e+07	0.00800742	5.40922e+07	0.00929772	7.06847e+07	0.0106958	6.45701e+07	0.0137043
Csa_010426818.1	PREDICTED: 30S ribosomal protein 2, chloroplastic [Camelina sativa]	0	42	1	253		0	5.775e+06	0.00105332		0	1.78459e+06	0.000274011	6.4236e+06	0.000868272	1.92081e+06	0.000364165
Csa_010518437.1	PREDICTED: probable glutamyl endopeptidase, chloroplastic isoform X1 [Camelina sativa]	0	38	11	960		0	5.74073e+07	0.00275946	58824126	0.00306001	8.40986e+07	0.00340304	7.88149e+07	0.0028076	4.96503e+07	0.00248076
Csa_010505755.1	PREDICTED: eukaryotic translation initiation factor 2 subunit alpha homolog [Camelina sativa]	0	36	6	344		0	8.71327e+07	0.0116883	4.8759e+07	0.0070784	6.73246e+07	0.00760266	1.21526e+08	0.0120812	8.65522e+07	0.0120685
Csa_010493802.1	PREDICTED: uncharacterized protein LOC104771027 [Camelina sativa]	0	103	5	370		0	2.05974e+08	0.0256885	1.80323e+08	0.0243381	2.52743e+08	0.0265355	2.7281e+08	0.0252149	1.98526e+08	0.0257365
Csa_010435586.1	PREDICTED: NADH dehydrogenase [ubiquinone] iron-sulfur protein 1, mitochondrial-like [Camelina sativa]	0	30	12	745		0	7.41799e+07	0.00459471	3.65546e+07	0.00245033	8.54355e+07	0.00445484	8.03897e+07	0.00369014	7.82906e+07	0.00504066
Csa_010462291.1	PREDICTED: proteasome subunit alpha type-5-A [Camelina sativa]	0	42	4	237		0	1.35208e+08	0.0263258	8.52718e+07	0.0179678	1.89433e+08	0.0310497	2.49895e+08	0.0360584	2.12754e+08	0.0430589
Csa_010465388.1	PREDICTED: trifunctional UDP-glucose 4,6-dehydratase/UDP-4-keto-6-deoxy-D-glucose 3,5-epimerase/UDP-4-keto-L-rhamnose-reductase RHM3 [Camelina sativa]	0	47	3	664		0	4.3119e+07	0.0029966	2.33875e+07	0.00175895	5.72967e+07	0.00335206	9.82111e+07	0.00505814	5.18344e+07	0.00374441
Csa_010469503.1	PREDICTED: chaperonin CPN60-like 1, mitochondrial [Camelina sativa]	0	60	7	585		0	3.11359e+07	0.00245603	1.20666e+07	0.00103007	4.01951e+07	0.00266911	3.87084e+07	0.0022628	2.35286e+07	0.00192919
Csa_010472943.1	PREDICTED: D-glycerate 3-kinase, chloroplastic isoform X2 [Camelina sativa]	0	70	0	461		0	878386	8.7925e-05	363368	3.93626e-05	1697314	0.000143025	1.53378e+06	0.000113778	1.03493e+06	0.000107682
Csa_019101546.1	PREDICTED: uncharacterized protein LOC104787410 isoform X2 [Camelina sativa]	0	22	1	727		0	5.14455e+06	0.000326543	4437574	0.000304824	9159722	0.000489438	10190873	0.000479375	11008893	0.000726345
Csa_010441346.1	PREDICTED: 40S ribosomal protein S7-3-like [Camelina sativa]	0	17	0	86		0	63739554	0.034201	26687272	0.0154969	44612216	0.0201514	48128266	0.0191381	4.49075e+07	0.0250469
Csa_010448542.1	PREDICTED: glucose-6-phosphate isomerase 1, chloroplastic [Camelina sativa]	0	38	11	617		0	6.74811e+07	0.00504691	5.17536e+07	0.00418884	8.43583e+07	0.0053112	106704186	0.00591418	8.87307e+07	0.00689799
Csa_010459749.1	PREDICTED: catalase-1-like [Camelina sativa]	0	151	2	492		0	9.08446e+06	0.000852044	685299	6.9559e-05	37226.8	2.93927e-06	100358	6.97568e-06		0
Csa_010416235.1	PREDICTED: 2-isopropylmalate synthase 2, chloroplastic [Camelina sativa]	0	21	2	627		0	1.17354e+07	0.000863695	1.48049e+07	0.00117917	8.58732e+06	0.000532035	1.01071e+07	0.000551263	7.66434e+06	0.000586329
Csa_010440587.1	PREDICTED: ATP-citrate synthase beta chain protein 2-like [Camelina sativa]	0	47	8	608		0	3.61419e+07	0.00274306	2.35504e+07	0.00193434	6.78095e+07	0.00433248	7.26907e+07	0.00408859	5.32537e+07	0.00420127
Csa_010465268.1	PREDICTED: dihydrolipoyllysine-residue acetyltransferase component 2 of pyruvate dehydrogenase complex, mitochondrial [Camelina sativa]	0	23	7	542		0	2.58838e+07	0.00220372	2.86142e+07	0.00263646	4.26562e+07	0.00305727	4.80497e+07	0.00303172	3.5244e+07	0.00311903
Csa_010460775.1	PREDICTED: 60S ribosomal protein L18a-1 [Camelina sativa]	0	26	1	178		0	24921746	0.0064608	4.15356e+06	0.0011653	8481518	0.00185099	9.50447e+06	0.00182602	8.00228e+06	0.00215639
Csa_010465008.1	PREDICTED: nascent polypeptide-associated complex subunit alpha-like protein 1 [Camelina sativa]	0	70	1	205		0	7.94409e+07	0.0178821	8.34589e+07	0.0203309	1.05832e+08	0.0200545	1.23183e+08	0.0205492	7.68011e+07	0.01797
Csa_019094442.1	PREDICTED: MLP-like protein 423 [Camelina sativa]	0	73	1	120		0	56434832	0.0217017	41017944	0.0170699	90937832	0.0294383	94969176	0.0270645	91174440	0.036444
Csa_010430531.1	PREDICTED: elongation factor Tu, mitochondrial [Camelina sativa]	0	37	4	453		0	3.53659e+07	0.00360258	1.54898e+07	0.0017076	2.16467e+07	0.00185628	4.06989e+07	0.00307244	3.41622e+07	0.00361727
Csa_010480239.1	PREDICTED: GTP-binding protein SAR1B-like [Camelina sativa]	0	15	0	254		0	2.79008e+07	0.00506888	1.16423e+07	0.00228899	3.64506e+07	0.00557469	4.30303e+07	0.00579347	3.25486e+07	0.00614657
Csa_010512789.1	PREDICTED: lipoxygenase 2, chloroplastic-like [Camelina sativa]	0	44	0	901		0		0		0		0		0		0
Csa_010420216.1	PREDICTED: 40S ribosomal protein S19-2 [Camelina sativa]	0	48	0	143		0		0		0		0		0		0
Csa_010474974.1	PREDICTED: coproporphyrinogen-III oxidase 1, chloroplastic-like [Camelina sativa]	0	48	3	388		0	1.68093e+08	0.0199915	1.43963e+08	0.0185292	1.97114e+08	0.019735	2.35809e+08	0.0207838	1.40598e+08	0.0173813
Csa_010421535.1	PREDICTED: serine hydroxymethyltransferase 2, mitochondrial [Camelina sativa]	0	153	0	517		0	5120099	0.000457	2.2913e+06	0.000221324	4411132	0.000331443	12576870	0.000831917	10695420	0.000992296
Csa_010429041.1	PREDICTED: coatomer subunit alpha-2-like [Camelina sativa]	0	36	4	1224		0	5.58348e+07	0.002105	3.10688e+07	0.0012676	7.77617e+07	0.00246794	1.14115e+08	0.00318831	7.28125e+07	0.00285337
Csa_010449352.1	PREDICTED: cell division protein FtsZ homolog 1, chloroplastic-like [Camelina sativa]	0	26	8	427		0	5.25729e+07	0.00568149	3.42904e+07	0.00401036	49027119	0.00446024	49131388	0.00393486	3.57073e+07	0.0040111
Csa_010415633.1	PREDICTED: 60S ribosomal protein L10-3-like [Camelina sativa]	0	73	0	221		0	45231432	0.00944444		0		0		0		0
Csa_010443038.1	PREDICTED: 50S ribosomal protein L24, chloroplastic [Camelina sativa]	0	42	7	197		0	1.66832e+08	0.0390788	8.01963e+07	0.0203295	1.42465e+08	0.0280926	1.22791e+08	0.0213156	7.49685e+07	0.0182535
Csa_010465351.1	PREDICTED: 60S ribosomal protein L18a-3 [Camelina sativa]	0	25	0	178		0		0		0		0		0		0
Csa_010459056.1	PREDICTED: methyl-CpG-binding domain-containing protein 10-like [Camelina sativa]	0	30	1	466		0	4.6761e+07	0.00463048	2.94135e+07	0.0031521	6.36093e+07	0.00530255	7.79334e+07	0.00571921	5.57328e+07	0.00573665
Csa_010453401.1	PREDICTED: uncharacterized protein LOC104735332 [Camelina sativa]	0	37	6	211		0	1.28971e+08	0.0282056	8.30301e+07	0.0196513	128215428	0.0236052	1.40266e+08	0.0227336	9.87199e+07	0.0224417
Csa_019093827.1	PREDICTED: ubiquitin-activating enzyme E1 1 [Camelina sativa]	0	42	10	1082		0	5.88241e+07	0.00250874	1.83673e+07	0.000847726	4.92707e+07	0.00176893	7.46687e+07	0.00235999	4.65258e+07	0.00206253
Csa_010517780.1	PREDICTED: protein COLD-REGULATED 15A, chloroplastic-like [Camelina sativa]	0	30	7	140		0	6.0125e+07	0.0198178	4.73402e+07	0.0168865	7.87568e+07	0.0218529	8.0978e+07	0.0197805	6.17413e+07	0.0211535
Csa_010509497.1	PREDICTED: cell division protein FtsZ homolog 2-1, chloroplastic isoform X2 [Camelina sativa]	0	28	7	482		0	6.75536e+07	0.0064674	4.17938e+07	0.00433016	7.85169e+07	0.00632799	7.19706e+07	0.0051063	6.60753e+07	0.00657546
Csa_010426556.1	PREDICTED: 40S ribosomal protein S13-2-like [Camelina sativa]	0	98	1	151		0	18853512	0.0057616	3.45861e+06	0.00114383	2.30633e+06	0.000593328	9083712	0.00205724	3.38789e+06	0.00107618
Csa_010465426.1	PREDICTED: phosphoenolpyruvate carboxylase 3-like [Camelina sativa]	0	182	0	968		0		0		0		0		0		0
Csa_010413397.1	PREDICTED: photosystem I chlorophyll a/b-binding protein 2, chloroplastic [Camelina sativa]	0	32	3	256		0	1.36043e+08	0.0245225	8.89653e+07	0.0173548	1.83307e+08	0.0278156	1.3052e+08	0.0174355	1.11296e+08	0.0208532
Csa_010449208.1	PREDICTED: plasma membrane-associated cation-binding protein 1 [Camelina sativa]	0	34	5	234		0	6.87159e+07	0.0135509	1.23938e+08	0.02645	1.33049e+08	0.0220874	1.47324e+08	0.0215306	1.24952e+08	0.025613
Csa_010484905.1	PREDICTED: 60S ribosomal protein L3-1-like [Camelina sativa]	0	30	0	163		0	8.19702e+07	0.0232058	3.88492e+07	0.0119024	7.39364e+07	0.0176206	5.77984e+07	0.0121262	5.658e+07	0.0166498
Csa_019094113.1	PREDICTED: D-glycerate 3-kinase, chloroplastic isoform X1 [Camelina sativa]	0	57	0	488		0	878386	8.30603e-05	363368	3.71848e-05	1697314	0.000135111	1.53378e+06	0.000107483	1.03493e+06	0.000101724
Csa_010432412.1	PREDICTED: coatomer subunit gamma [Camelina sativa]	0	25	5	888		0	6.40808e+07	0.00332999	23780301	0.00133734	5.13179e+07	0.00224495	5.22555e+07	0.00201241	4.97566e+07	0.00268764
Csa_010429381.1	PREDICTED: leucine aminopeptidase 1 [Camelina sativa]	0	62	0	518		0	1.61462e+08	0.0143836	1.10074e+08	0.0106119	1.50618e+08	0.0112952	1.3915e+08	0.00918652	1.09112e+08	0.0101036
Csa_010450798.2	PREDICTED: uncharacterized protein At5g39570 isoform X1 [Camelina sativa]	0	74	1	398		0	3.25677e+07	0.00377601	1.66754e+07	0.00209234	3.04533e+07	0.00297236	5.79841e+07	0.00498224	3.63544e+07	0.00438135
Csa_010461649.1	PREDICTED: 50S ribosomal protein L18, chloroplastic-like [Camelina sativa]	0	32	7	174		0	1.72052e+08	0.0456287	1.29191e+08	0.0370783	1.64915e+08	0.036818	1.27367e+08	0.0250326	7.97536e+07	0.0219854
Csa_010453488.1	PREDICTED: nascent polypeptide-associated complex subunit alpha-like protein 3 [Camelina sativa]	0	67	0	203		0	7.20739e+07	0.0163836	7.94807e+07	0.0195526	9.7639e+07	0.0186843	1.10003e+08	0.0185314	6.84418e+07	0.0161718
Csa_010461692.1	PREDICTED: receptor for activated C kinase 1B-like [Camelina sativa]	0	38	6	326		0	4.14689e+07	0.00586994	2.3347e+07	0.00357645	4.61765e+07	0.00550241	4.56837e+07	0.00479227	3.06044e+07	0.00450298
Csa_019092145.1	PREDICTED: 5-methyltetrahydropteroyltriglutamate--homocysteine methyltransferase 2-like [Camelina sativa]	0	13	0	246		0	6.12783e+07	0.0114948	2.00825e+07	0.00407682	3.47235e+07	0.00548325	3.15417e+07	0.00438479	2.46822e+07	0.00481264
Csa_010459726.1	PREDICTED: dehydrin COR47-like [Camelina sativa]	0	22	4	245		0	3.6658e+07	0.00690447	34883139	0.0071103	3.93981e+07	0.00624682	4.50588e+07	0.00628943	5.96906e+07	0.0116862
Csa_010476618.1	PREDICTED: methyl-CpG-binding domain-containing protein 10 [Camelina sativa]	0	28	0	387		0	4.6215e+07	0.00551062	2.94135e+07	0.00379555	6.36093e+07	0.00638498	6.51705e+07	0.00575888	5.27555e+07	0.00653869
Csa_010465286.1	PREDICTED: subtilisin-like protease SBT1.4 [Camelina sativa]	0	24	6	789		0	31742997	0.00185652	3.32193e+07	0.00210258	47847814	0.00235578	6.21352e+07	0.00269314	3.87647e+07	0.00235664
Csa_010512906.1	PREDICTED: NADPH-dependent thioredoxin reductase 3-like [Camelina sativa]	0	45	0	404		0	6.40973e+07	0.00732127	7.67263e+07	0.00948421	1.10975e+08	0.0106708	105774747	0.00895362	8.36505e+07	0.00993164
Csa_010417938.1	PREDICTED: UDP-D-apiose/UDP-D-xylose synthase 1 [Camelina sativa]	0	50	1	389		0	7877850	0.000934515	5.91008e+06	0.000758721	4.06736e+06	0.000406175	7.29966e+06	0.000641728	7.28757e+06	0.000898601
Csa_010421566.1	PREDICTED: 60S ribosomal protein L18-2 [Camelina sativa]	0	25	5	187		0	6.40561e+07	0.0158069	9.962e+06	0.00266038	6.41829e+07	0.013333	5.30382e+07	0.00969941	4.11706e+07	0.0105604
Csa_010459323.1	PREDICTED: 1-deoxy-D-xylulose 5-phosphate reductoisomerase, chloroplastic-like [Camelina sativa]	0	51	2	480		0	4720842	0.000453844	5565470	0.000579027	6.20829e+06	0.000502436	129918360	0.00925609	1.23768e+08	0.0123681
Csa_010460862.1	PREDICTED: obg-like ATPase 1 [Camelina sativa]	0	25	11	394		0	4.11894e+07	0.00482411	2.30559e+07	0.0029223	4.20137e+07	0.00414233	3.52747e+07	0.00306172	1.9864e+07	0.00241827
Csa_010516230.1	PREDICTED: copper transport protein CCH-like isoform X1 [Camelina sativa]	0	51	6	120		0	8.29371e+07	0.031893	5.69159e+07	0.0236859	1.14654e+08	0.0371159	1.28807e+08	0.0367077	8.26781e+07	0.0330478
Csa_010413275.1	PREDICTED: GTP-binding protein SAR1A-like [Camelina sativa]	0	14	0	193		0	2.79008e+07	0.00667096	1.16423e+07	0.00301246	3.64506e+07	0.00733664	4.30303e+07	0.00762456	3.25486e+07	0.00808927
Csa_010415162.1	PREDICTED: glutamine synthetase cytosolic isozyme 1-2-like isoform X1 [Camelina sativa]	0	36	0	356		0	77166294	0.0100024	61134649	0.00857582	75884950	0.00828048	116292272	0.0111712	65837887	0.00887074
Csa_010415164.1	PREDICTED: glutamine synthetase cytosolic isozyme 1-2-like isoform X4 [Camelina sativa]	0	36	0	276		0	77166294	0.0129017	61134649	0.0110616	75884950	0.0106806	116292272	0.0144092	65837887	0.011442
Csa_010445119.1	PREDICTED: heat shock protein 90-1 [Camelina sativa]	0	68	2	706		0	2.69939e+07	0.00176437	1.80952e+08	0.0127996	3.61657e+07	0.00198995	1.34727e+07	0.000652602	1.71723e+07	0.0011667
Csa_019101480.1	PREDICTED: uncharacterized protein LOC104777950 isoform X1 [Camelina sativa]	0	17	6	676		0	1.32997e+07	0.000907869	5.73789e+06	0.000423881	2.25955e+07	0.00129845	2.91861e+07	0.00147648	2.14859e+07	0.00152455
Csa_010439561.1	PREDICTED: tripeptidyl-peptidase 2-like [Camelina sativa]	0	29	13	1387		0	1.09486e+08	0.00364258	6.2001e+07	0.00223234	1.05089e+08	0.00294327	1.24075e+08	0.00305919	8.76845e+07	0.00303236
Csa_010465892.1	PREDICTED: receptor for activated C kinase 1C [Camelina sativa]	0	38	2	326		0	3.55239e+07	0.00502842	4.0777e+07	0.00624649	4.99019e+07	0.00594634	4.17067e+07	0.00437508	3.09489e+07	0.00455367
Csa_010445326.1	PREDICTED: ATP-dependent Clp protease proteolytic subunit-related protein 4, chloroplastic-like [Camelina sativa]	0	27	7	365		0	1.14078e+08	0.0144224	9.32611e+07	0.0127599	1.20084e+08	0.0127803	1.32665e+08	0.0124297	8.97869e+07	0.0117992
Csa_010420210.1	PREDICTED: UDP-glucose 6-dehydrogenase 3-like [Camelina sativa]	0	69	1	480		0	8.92672e+07	0.00858181	6.97986e+07	0.00726179	1.38477e+08	0.011207	1.87635e+08	0.0133682	1.31338e+08	0.0131245
Csa_010462880.1	PREDICTED: 60S ribosomal protein L10-2 [Camelina sativa]	0	36	0	184		0	45231432	0.0113436		0		0		0		0
Csa_010491343.1	PREDICTED: staphylococcal nuclease domain-containing protein 1 [Camelina sativa]	0	34	3	989		0	30869816	0.00144034	21667930	0.00109411	3.59788e+07	0.00141319	37831314	0.00130814	3.25148e+07	0.00157695
Csa_010432896.1	PREDICTED: aspartate--tRNA ligase 2, cytoplasmic [Camelina sativa]	0	31	6	551		0	7.47876e+07	0.00626334	3.31119e+07	0.00300103	7.47942e+07	0.0052731	4.28508e+07	0.00265953	6.02287e+07	0.00524307
Csa_010453680.1	PREDICTED: chaperone protein ClpB3, chloroplastic [Camelina sativa]	0	28	9	973		0	4.9097e+07	0.00232847	3.51395e+07	0.00180352	6.86835e+07	0.00274214	7.99047e+07	0.00280839	6.69431e+07	0.0033001
Csa_010466944.1	PREDICTED: peptidyl-prolyl cis-trans isomerase FKBP62-like [Camelina sativa]	0	44	10	562		0	5.17393e+07	0.00424827	2.085e+07	0.00185271	4.74898e+07	0.00328257	6.25178e+07	0.00380422	4.18934e+07	0.00357555
Csa_010478956.1	PREDICTED: 50S ribosomal protein L21, chloroplastic [Camelina sativa]	0	29	1	216		0	1.11068e+08	0.0237282	1.02123e+08	0.0236106	102625973	0.0184567	1.51556e+08	0.0239948	105852354	0.0235061
Csa_010416995.1	PREDICTED: chaperone protein dnaJ A6, chloroplastic [Camelina sativa]	0	27	6	446		0	2.81319e+07	0.00291067	1.61966e+07	0.00181354	3.6463e+07	0.0031759	5.88741e+07	0.00451427	3.56814e+07	0.00383743
Csa_010425739.1	PREDICTED: UDP-glucose 6-dehydrogenase 2 [Camelina sativa]	0	69	0	480		0		0		0		0		0		0
Csa_010420796.1	PREDICTED: importin-5 [Camelina sativa]	0	19	8	1116		0	4.16168e+07	0.00172081	1.6995e+07	0.000760495	4.93221e+07	0.00171683	6.46855e+07	0.00198217	5.47712e+07	0.00235409
Csa_010512253.1	PREDICTED: uncharacterized protein LOC104788231 [Camelina sativa]	0	26	0	714		0		0		0		0		0		0
Csa_010425847.1	PREDICTED: nitrilase 2 isoform X1 [Camelina sativa]	0	26	5	346		0	49983425	0.0066662	4.32091e+07	0.00623646	7.18876e+07	0.008071	9.62866e+07	0.00951674	6.80511e+07	0.00943393
Csa_010475970.1	PREDICTED: alpha-glucan water dikinase 1, chloroplastic [Camelina sativa]	0	46	5	1402		0	5.05627e+07	0.00166422	3.44255e+07	0.00122623	1.01389e+08	0.00280926	1.02922e+08	0.0025105	8.27869e+07	0.00283235
Csa_010420996.1	PREDICTED: chaperone protein dnaJ 2 isoform X1 [Camelina sativa]	0	35	1	421		0	4.86042e+06	0.000532746	1.84238e+06	0.000218542	5.60319e+06	0.000517015	11940492	0.000969925	5.82742e+06	0.000663939
Csa_010479447.1	PREDICTED: leucine-rich repeat extensin-like protein 3 [Camelina sativa]	0	45	1	502		0	1.01161e+08	0.00929906	1.06043e+08	0.0105492	1.30156e+08	0.0100719	1.40229e+08	0.00955284	8.76269e+07	0.00837274
Csa_010506558.1	PREDICTED: phosphomannomutase [Camelina sativa]	0	31	5	246		0	4.27363e+07	0.00801659	2.61226e+07	0.00530297	3.50055e+07	0.00552778	4.20499e+07	0.00584558	3.20456e+07	0.00624838
Csa_010426578.1	PREDICTED: transketolase, chloroplastic-like [Camelina sativa]	0	367	2	733		0	392794280	0.024728	333353416	0.0227112	555177648	0.0294224	730994712	0.0341042	650068344	0.0425392
Csa_010427300.1	PREDICTED: psbP-like protein 1, chloroplastic [Camelina sativa]	0	22	1	231		0	4.45627e+07	0.008902	3.7496e+07	0.0081061	6.06759e+07	0.0102036	5.34152e+07	0.00790772	5.64702e+07	0.0117258
Csa_010442845.1	PREDICTED: plastidial pyruvate kinase 2 [Camelina sativa]	0	34	8	581		0	6.89612e+07	0.00547718	3.60351e+07	0.00309734	5.74627e+07	0.00384202	8.7145e+07	0.00512938	6.93658e+07	0.00572669
Csa_010477513.1	PREDICTED: patellin-2-like [Camelina sativa]	0	30	2	712		0	2.93331e+07	0.00190111	4.14701e+07	0.00290866	5.01787e+07	0.00273772	4.20499e+07	0.00201968	3.9482e+07	0.00265983
Csa_010441760.1	PREDICTED: pectin acetylesterase 11 [Camelina sativa]	0	25	5	391		0	22677670	0.00267639	8763124	0.00111923	3.61713e+07	0.00359366	4.56466e+07	0.00399236	29505500	0.0036196
Csa_010459148.1	PREDICTED: uncharacterized protein LOC104740296 [Camelina sativa]	0	24	8	312		0	8.56799e+07	0.0126722	4.18591e+07	0.00669998	5.74334e+07	0.00715089	8.22847e+07	0.00901909	5.42399e+07	0.0083387
Csa_010456751.1	PREDICTED: ABC transporter F family member 1 [Camelina sativa]	0	31	7	596		0	3.30693e+07	0.00256039	1.43481e+07	0.00120223	4.18143e+07	0.00272539	8.74768e+07	0.00501932	7.15483e+07	0.00575821
Csa_010416364.1	PREDICTED: pathogenesis-related protein 5-like [Camelina sativa]	0	28	7	240		0	80926867	0.01556	4.97741e+07	0.0103569	1.17664e+08	0.0190451	158354007	0.022564	94532425	0.0188931
Csa_010427497.2	PREDICTED: psbP domain-containing protein 6, chloroplastic isoform X1 [Camelina sativa]	0	34	8	312		0	5.08455e+07	0.00752015	3.28575e+07	0.00525918	5.38658e+07	0.00670669	6.29364e+07	0.00689835	3.85255e+07	0.0059228
Csa_019100802.1	PREDICTED: 50S ribosomal protein L21, chloroplastic-like [Camelina sativa]	0	23	0	145		0	99696170	0.0317277	9.48319e+07	0.0326607	91644497	0.0245521	1.25645e+08	0.029633	96037070	0.0317691
Csa_010420373.1	PREDICTED: glutathione S-transferase DHAR3, chloroplastic [Camelina sativa]	0	44	6	258		0	368019290	0.0658232	258873707	0.050108	274676123	0.0413572	314998634	0.0417529	2.64234e+08	0.0491251
Csa_010437085.1	PREDICTED: nascent polypeptide-associated complex subunit alpha-like protein 4 [Camelina sativa]	0	35	4	213		0	7.2728e+07	0.0157561	3.86892e+07	0.00907085	9.32113e+07	0.0169996	1.18715e+08	0.01906	8.59908e+07	0.0193645
Csa_010500525.1	PREDICTED: leucine-rich repeat extensin-like protein 3 [Camelina sativa]	0	43	0	504		0	9.97305e+07	0.00913116	1.05935e+08	0.0104965	129652853	0.00999313	138952670	0.00942832	8.61477e+07	0.00819874
Csa_010518538.1	PREDICTED: 60S ribosomal protein L7-2-like, partial [Camelina sativa]	0	38	0	175		0	1.42532e+08	0.0375839	8.57663e+07	0.0244747	1.63607e+08	0.0363173	1.26895e+08	0.0247974	9.9681e+07	0.0273217
Csa_010464636.1	PREDICTED: isocitrate dehydrogenase [NAD] catalytic subunit 6, mitochondrial [Camelina sativa]	0	20	3	374		0	6.17433e+06	0.00076181	9.02542e+06	0.00120513	4.65989e+06	0.000484009	8.89417e+06	0.000813264	6.07611e+06	0.00077927
Csa_010414466.1	PREDICTED: outer envelope pore protein 16-1, chloroplastic [Camelina sativa]	0	12	4	148		0	4.25491e+07	0.0132665	6.82063e+06	0.00230145	2.80003e+07	0.00734938	2.70681e+07	0.00625452	2.39651e+07	0.00776697
Csa_010438032.1	PREDICTED: coatomer subunit beta-1 [Camelina sativa]	0	26	2	948		0	2.13034e+07	0.00103698	10154678	0.000534929	25365644	0.00103941	25896205	0.00093417	2.41007e+07	0.00121943
Csa_010416695.1	PREDICTED: protein disulfide isomerase-like 1-2 [Camelina sativa]	0	23	10	509		0	7.60501e+07	0.00689462	3.7724e+07	0.00370117	8.252e+07	0.00629784	9.65439e+07	0.00648642	6.5433e+07	0.00616613
Csa_010475097.1	PREDICTED: uncharacterized protein LOC104754577 [Camelina sativa]	0	22	1	416		0	9.21107e+07	0.0102175	4.77162e+07	0.00572811	6.4655e+07	0.00603752	9.08022e+07	0.00746451	4.99578e+07	0.00576029
Csa_010518448.1	PREDICTED: protein disulfide-isomerase like 2-1 isoform X2 [Camelina sativa]	0	20	1	327		0	4.48136e+06	0.000632398		0	4.00767e+06	0.000476096	9.19042e+06	0.000961138	6.46757e+06	0.000948697
Csa_010499182.1	PREDICTED: 3-oxoacyl-[acyl-carrier-protein] reductase, chloroplastic [Camelina sativa]	0	31	3	322		0	3.18953e+07	0.00457087	1.02066e+07	0.00158294	3.13903e+07	0.00378695	4.31855e+07	0.00458649	3.78232e+07	0.00563425
Csa_010431916.1	PREDICTED: S-adenosylmethionine carrier 1, chloroplastic/mitochondrial isoform X1 [Camelina sativa]	0	26	5	353		0	6.68725e+07	0.0087418	3.06822e+07	0.00434061	83213970	0.00915738	6.86857e+07	0.00665411	6.46855e+07	0.00878954
Csa_010475554.1	PREDICTED: histone H2B.1-like [Camelina sativa]	0	227	0	146		0		0		0		0		0		0
Csa_010443777.1	PREDICTED: histone H2B.11 [Camelina sativa]	0	227	0	150		0		0		0		0		0		0
Csa_010464784.1	PREDICTED: superoxide dismutase [Mn] 1, mitochondrial [Camelina sativa]	0	24	5	231		0	3.38461e+07	0.00676121	2.9171e+07	0.00630634	4.89678e+07	0.00823471	7.86446e+07	0.0116427	45634829	0.00947585
Csa_010458606.1	PREDICTED: aspartic proteinase A1 [Camelina sativa]	0	22	4	506		0	4.5308e+07	0.00413192	4.16284e+07	0.00410844	4.97705e+07	0.00382095	5.287e+07	0.00357319	3.74523e+07	0.00355028
Csa_010422616.1	PREDICTED: 60S ribosomal protein L19-3-like [Camelina sativa]	0	52	2	209		0	1.44747e+06	0.00031959	1.6202e+06	0.000387134	3.36513e+06	0.000625469	1.11738e+07	0.00182833	4.68974e+06	0.00107631
Csa_010434720.1	PREDICTED: beta-amylase 3, chloroplastic [Camelina sativa]	0	25	8	548		0	4.05596e+07	0.00341539	5.43003e+07	0.00494835	4.28912e+07	0.00304045	6.09044e+07	0.00380072	3.98223e+07	0.00348562
Csa_010508823.1	PREDICTED: tRNA-aminoacylation cofactor arc1-like isoform X1 [Camelina sativa]	0	15	6	389		0	26785785	0.00317748	1.25387e+07	0.00160969	1.73869e+07	0.00173629	1.69188e+07	0.00148737	1.78271e+07	0.00219819
Csa_010510827.1	PREDICTED: thionin-like [Camelina sativa]	0	154	1	133		0	1.79891e+08	0.0624146	1.11726e+08	0.0419507	2.17515e+08	0.0635313	2.55212e+08	0.0656218	2.06068e+08	0.074318
Csa_010443774.1	PREDICTED: actin-depolymerizing factor 3 [Camelina sativa]	0	18	5	139		0	3.43062e+07	0.011389	58296380	0.0209443	5.00025e+07	0.0139742	5.18512e+07	0.0127568	3.36761e+07	0.0116209
Csa_019088988.1	PREDICTED: aminoacylase-1-like [Camelina sativa]	0	29	4	670		0	8.33072e+07	0.00573767	3.76274e+07	0.00280458	77048159	0.00446722	114089248	0.00582328	7.67619e+07	0.00549547
Csa_010430239.1	PREDICTED: coatomer subunit alpha-1 [Camelina sativa]	0	35	2	1216		0	7.75698e+06	0.000294366	5.81913e+06	0.000238981	1.03094e+07	0.000329343	1.36958e+07	0.000385168	7.75099e+06	0.000305744
Csa_010418473.1	PREDICTED: 6-phosphogluconate dehydrogenase, decarboxylating 1, chloroplastic-like [Camelina sativa]	0	20	3	487		0	4.73143e+07	0.00448323	1.75712e+07	0.00180181	45658040	0.00364199	6.51233e+07	0.00457305	4.56135e+07	0.00449261
Csa_010479745.1	PREDICTED: coatomer subunit beta'-2 [Camelina sativa]	0	33	1	921		0	4.27676e+07	0.00214281	3.08994e+07	0.00167544	3.99027e+07	0.00168303	4.77916e+07	0.00177456	3.68151e+07	0.00191735
Csa_010460011.1	PREDICTED: patellin-2 [Camelina sativa]	0	27	0	714		0	2.84255e+07	0.00183712	4.0095e+07	0.00280434	4.7475e+07	0.00258295	3.93931e+07	0.00188677	3.69376e+07	0.00248144
Csa_010446372.1	PREDICTED: 26S proteasome non-ATPase regulatory subunit 4 homolog [Camelina sativa]	0	21	3	387		0	2.93534e+07	0.00350006	1.13963e+07	0.00147059	3.25863e+07	0.00327095	4.12014e+07	0.00364082	2.20641e+07	0.0027347
Csa_010433609.1	PREDICTED: mediator of RNA polymerase II transcription subunit 36a [Camelina sativa]	0	37	0	321		0	2.51382e+06	0.000361374	1.40486e+06	0.000218557	2.5979e+06	0.000314389	3225121	0.000343589	1.79622e+06	0.000268404
Csa_010416506.1	PREDICTED: 26S proteasome non-ATPase regulatory subunit 3 homolog B [Camelina sativa]	0	19	3	487		0	2.68139e+07	0.00254074	6.68139e+06	0.000685135	3.64113e+07	0.00290441	5.23558e+07	0.00367649	3.87613e+07	0.00381771
Csa_010459627.1	PREDICTED: glutathione S-transferase DHAR1, mitochondrial [Camelina sativa]	0	70	7	213		0	1.87597e+08	0.040642	9.35063e+07	0.021923	2.38104e+08	0.0434248	3.53359e+08	0.0567329	2.22104e+08	0.0500161
Csa_010436477.1	PREDICTED: bifunctional aspartokinase/homoserine dehydrogenase 2, chloroplastic-like [Camelina sativa]	0	21	7	935		0	6.15618e+07	0.00303828	2.64891e+07	0.0014148	4.24155e+07	0.00176223	46527319	0.00170175	37346242	0.00191588
Csa_010495134.1	PREDICTED: uncharacterized protein LOC104772190 [Camelina sativa]	0	19	4	350		0	5.07755e+07	0.00669444	1.81135e+07	0.00258448	4.62019e+07	0.00512793	4.90166e+07	0.00478931	3.00372e+07	0.00411647
Csa_010462242.1	PREDICTED: trifunctional UDP-glucose 4,6-dehydratase/UDP-4-keto-6-deoxy-D-glucose 3,5-epimerase/UDP-4-keto-L-rhamnose-reductase RHM2 [Camelina sativa]	0	38	1	668		0	2.1525e+06	0.000148694		0	3.29929e+06	0.000191864	3.40978e+06	0.000174561	2316687	0.000166351
Csa_010483764.1	PREDICTED: uncharacterized protein LOC104762211 [Camelina sativa]	0	21	0	416		0	9.21107e+07	0.0102175	4.77162e+07	0.00572811	6.4655e+07	0.00603752	9.08022e+07	0.00746451	4.99578e+07	0.00576029
Csa_010425792.1	PREDICTED: ATPase 8, plasma membrane-type-like [Camelina sativa]	0	46	1	948		0		0		0		0		0		0
Csa_010434247.1	PREDICTED: eukaryotic translation initiation factor 3 subunit D-like [Camelina sativa]	0	33	3	591		0	4.65718e+07	0.00363633	1.0125e+07	0.00085555	4.56024e+07	0.00299744	55474508	0.00320999	4.34696e+07	0.00352803
Csa_010416088.1	PREDICTED: ribulose bisphosphate carboxylase/oxygenase activase, chloroplastic-like isoform X1 [Camelina sativa]	0	20	0	428		0	1.42033e+07	0.00153135	1.62429e+07	0.00189521	1.94784e+07	0.00176791	1.1664e+07	0.000931973	9.81734e+06	0.00110023
Csa_019083325.1	PREDICTED: ribulose bisphosphate carboxylase/oxygenase activase, chloroplastic-like isoform X2 [Camelina sativa]	0	20	0	407		0	1.42033e+07	0.00161036	1.62429e+07	0.001993	1.94784e+07	0.00185913	1.1664e+07	0.00098006	9.81734e+06	0.001157
Csa_010489365.1	PREDICTED: ankyrin repeat domain-containing protein 2B [Camelina sativa]	0	34	4	345		0	3.03606e+07	0.00406088	1.97515e+07	0.00285903	2.39423e+07	0.00269586	3.3804e+07	0.00335079	2.85071e+07	0.00396341
Csa_010469273.1	PREDICTED: uncharacterized protein LOC104749364 isoform X2 [Camelina sativa]	0	23	0	767		0		0		0		0		0		0
Csa_010469272.1	PREDICTED: uncharacterized protein LOC104749364 isoform X1 [Camelina sativa]	0	23	0	789		0		0		0		0		0		0
Csa_019087372.1	PREDICTED: tubulin beta-9 chain-like [Camelina sativa]	0	39	0	213		0	1.73465e+07	0.00375804	8.0689e+06	0.00189179	24585378	0.00448381	2.71712e+07	0.00436242	2.15575e+07	0.00485458
Csa_010435836.1	PREDICTED: 40S ribosomal protein S9-2 [Camelina sativa]	0	175	1	197		0		0		0		0		0		0
Csa_010438961.1	PREDICTED: argininosuccinate synthase, chloroplastic [Camelina sativa]	0	14	2	497		0	1.67281e+06	0.000155316	28322	2.84581e-06		0	83236.1	5.72735e-06		0
Csa_010487081.1	PREDICTED: enhancer of mRNA-decapping protein 4 isoform X3 [Camelina sativa]	0	25	0	1355		0	2.73144e+07	0.000930209	1.52767e+07	0.000563026	3.59153e+07	0.00102965	4.85492e+07	0.0012253	3.07434e+07	0.00108829
Csa_010425553.1	PREDICTED: carbamoyl-phosphate synthase small chain, chloroplastic [Camelina sativa]	0	27	7	430		0	5.88961e+07	0.00632043	3.46206e+07	0.00402072	4.84603e+07	0.00437792	5.81409e+07	0.00462393	3.67747e+07	0.00410218
Csa_010441940.1	PREDICTED: acid phosphatase 1 [Camelina sativa]	0	27	5	272		0	4.00239e+07	0.00679013	4.28449e+07	0.00786626	5.02247e+07	0.00717296	71442473	0.00898226	5.26374e+07	0.00928237
Csa_010484397.1	PREDICTED: organellar oligopeptidase A, chloroplastic/mitochondrial [Camelina sativa]	0	25	5	818		0	4.51657e+07	0.00254791	3.42477e+07	0.00209082	5.43886e+07	0.00258288	7.55809e+07	0.00315978	5.28623e+07	0.00309975
Csa_010442043.1	PREDICTED: argininosuccinate synthase, chloroplastic-like [Camelina sativa]	0	17	3	494		0	6.66154e+07	0.00622266	2.57734e+07	0.00260545	26710577	0.00210042	5.22984e+07	0.00362042	3.96245e+07	0.00384743
Csa_010453759.1	PREDICTED: T-complex protein 1 subunit zeta 2 [Camelina sativa]	0	23	6	535		0	4.07009e+07	0.00351058	22820342	0.00213013	4.03446e+07	0.00292942	41151155	0.00263043	38127108	0.00341833
Csa_010426673.1	PREDICTED: proteasome subunit alpha type-7-A [Camelina sativa]	0	15	6	250		0	9.83964e+06	0.00181622	6.42276e+06	0.00128298	1.32043e+07	0.00205175	22223236	0.00303994	1.35437e+07	0.00259856
Csa_010432407.1	PREDICTED: cyclase-associated protein 1 [Camelina sativa]	0	23	11	478		0	5.96823e+07	0.00576164	3.43234e+07	0.00358592	77207138	0.0062745	1.29888e+08	0.00929264	1.03379e+08	0.0103738
Csa_010492649.1	PREDICTED: UDP-glycosyltransferase 91A1-like isoform X2 [Camelina sativa]	0	24	4	469		0	3.13323e+07	0.00308281	2.70298e+07	0.00287812	59791920	0.00495244	5.92329e+07	0.00431905	40306652	0.00412228
Csa_010457342.1	PREDICTED: elongation factor Tu, mitochondrial [Camelina sativa]	0	30	1	449		0	1.42502e+06	0.000146454	249455	2.7745e-05	983518	8.50914e-05	2.76556e+06	0.000210637		0
Csa_019089347.1	PREDICTED: uncharacterized protein At5g39570 isoform X2 [Camelina sativa]	0	59	0	351		0	2.08508e+07	0.00274122	3.79857e+06	0.000540444	2.10372e+07	0.00232826	3.12363e+07	0.00304334	2.28503e+07	0.00312261
Csa_010479124.1	PREDICTED: gamma carbonic anhydrase 2, mitochondrial-like [Camelina sativa]	0	21	5	278		0	3.9698e+07	0.0065895	2.41684e+07	0.00434152	4.69128e+07	0.00655536	5.82365e+07	0.00716389	4.08531e+07	0.00704879
Csa_010430348.1	PREDICTED: hsp70-Hsp90 organizing protein 2-like [Camelina sativa]	0	19	7	576		0	4.32498e+07	0.00346489	2.83441e+07	0.00245741	4.57982e+07	0.0030887	57657423	0.00342319	3.74938e+07	0.00312227
Csa_010442089.1	PREDICTED: 26S protease regulatory subunit 10B homolog A-like [Camelina sativa]	0	31	9	399		0	2.62134e+07	0.00303165	9.39956e+06	0.00117645	2.85895e+07	0.00278345	3.91076e+07	0.00335187	2.87296e+07	0.00345375
Csa_010433215.1	PREDICTED: 26S proteasome non-ATPase regulatory subunit 2 homolog B [Camelina sativa]	0	23	1	891		0	3.68565e+06	0.000190882	1130101	6.334e-05	3.19735e+06	0.0001394	4810152	0.00018462	3700810	0.000199229
Csa_010463641.1	PREDICTED: 6-phosphogluconate dehydrogenase, decarboxylating 3-like [Camelina sativa]	0	21	6	538		0	2.97958e+07	0.00255564	1.64119e+07	0.0015234	3.53848e+07	0.00255496	3.65576e+07	0.00232377	3.21485e+07	0.00286624
Csa_010466525.1	PREDICTED: putative inactive cysteine synthase 2 [Camelina sativa]	0	34	1	325		0		0		0		0	3344176	0.000351888	2.56257e+06	0.000378203
Csa_010428667.1	PREDICTED: L-ascorbate oxidase homolog [Camelina sativa]	0	22	6	542		0	8.96341e+07	0.00763136	2.13856e+07	0.00197042	7.41584e+07	0.00531509	44035173	0.00277842	3.32802e+07	0.00294524
Csa_010472129.2	PREDICTED: coatomer subunit alpha-2 [Camelina sativa]	0	32	0	1221		0		0		0		0		0		0
Csa_010476424.1	PREDICTED: nodulin-related protein 1-like [Camelina sativa]	0	65	1	159		0	1.78147e+06	0.000517022	589635	0.000185193	1994783	0.000487358	1357942	0.000292067	2.7014e+06	0.00081494
Csa_010465921.1	PREDICTED: 3-dehydroquinate synthase, chloroplastic [Camelina sativa]	0	35	9	439		0	8.1279e+07	0.00854362	6.97783e+07	0.00793769	1.1332e+08	0.0100275	1.45974e+08	0.0113713	1.0262e+08	0.0112125
Csa_010499612.1	PREDICTED: patellin-4-like [Camelina sativa]	0	27	3	560		0	2.3335e+07	0.00192286	9.97311e+06	0.000889367	3.18388e+07	0.00220861	4.51071e+07	0.00275458	2.86058e+07	0.00245019
Csa_010455161.1	PREDICTED: 5-methyltetrahydropteroyltriglutamate--homocysteine methyltransferase 1-like [Camelina sativa]	0	18	0	125		0	5.15e+07	0.0190119	1.47763e+07	0.00590331	45639754	0.0141835	42172745	0.0115377	41427034	0.0158967
Csa_019100108.1	PREDICTED: enhancer of mRNA-decapping protein 4-like [Camelina sativa]	0	22	1	1291		0	1.23107e+06	4.40031e-05	535343	2.07083e-05	4.85865e+06	0.000146197	4.85133e+06	0.000128509	5142595	0.000191069
Csa_019088407.1	PREDICTED: H/ACA ribonucleoprotein complex subunit 1-like [Camelina sativa]	0	29	3	354		0	3.07244e+07	0.00400505	18982048	0.0026778	39554441	0.00434052	6.027e+07	0.00582232	5.09581e+07	0.00690468
Csa_010434708.1	PREDICTED: ras-related protein RABB1c isoform X1 [Camelina sativa]	0	25	0	211		0	5.95916e+07	0.0130326	2.82393e+07	0.00668359	7.52345e+07	0.0138511	1.00583e+08	0.0163019	7.60053e+07	0.0172781
Csa_010465982.1	PREDICTED: putative 60S ribosomal protein L30-1 [Camelina sativa]	0	134	1	112		0		0		0	1.04473e+06	0.000362355		0		0
Csa_010482928.1	PREDICTED: dihydrolipoyllysine-residue succinyltransferase component of 2-oxoglutarate dehydrogenase complex 1, mitochondrial [Camelina sativa]	0	36	5	464		0	3.1653e+07	0.00314793	1.5494e+07	0.00166757	3.16e+07	0.00264557	4.22335e+07	0.0031127	2.82368e+07	0.00291898
Csa_010427414.1	PREDICTED: peptidyl-prolyl cis-trans isomerase CYP19-3-like [Camelina sativa]	0	27	2	176		0	28379365	0.00744077	10362801	0.00294038	3.17336e+07	0.00700417	35566604	0.00691079	3.61592e+07	0.00985461
Csa_019093695.1	PREDICTED: uncharacterized protein LOC104752898 [Camelina sativa]	0	20	4	762		0	2.23346e+07	0.00135255	1.45439e+07	0.000953158	2.22769e+07	0.00113566	2.70647e+07	0.00121463	2.31912e+07	0.00145983
Csa_010413305.1	PREDICTED: proline--tRNA ligase, cytoplasmic [Camelina sativa]	0	16	8	527		0	4.04429e+07	0.00354127	23993895	0.00227368	4.66052e+07	0.00343537	6.41524e+07	0.00416294	5.47892e+07	0.00498675
Csa_010505485.1	PREDICTED: protein FATTY ACID EXPORT 3, chloroplastic [Camelina sativa]	0	15	3	336		0	3.50826e+07	0.00481816	2.42489e+07	0.00360405	3.33248e+07	0.00385281	2.72121e+07	0.00276962	2.46888e+07	0.00352448
Csa_010490953.1	PREDICTED: protein BTR1 isoform X1 [Camelina sativa]	0	31	0	334		0	9.36292e+07	0.0129358	4.28936e+07	0.00641334	9.649e+07	0.0112224	1.31599e+08	0.0134742	1.08288e+08	0.0155513
Csa_010490954.1	PREDICTED: protein BTR1 isoform X2 [Camelina sativa]	0	31	0	313		0	9.36292e+07	0.0138037	4.28936e+07	0.00684363	9.649e+07	0.0119753	1.31599e+08	0.0143782	1.08288e+08	0.0165947
Csa_010476969.1	PREDICTED: eukaryotic peptide chain release factor GTP-binding subunit ERF3A-like [Camelina sativa]	0	22	2	532		0	3.90201e+07	0.00338458	2.22686e+07	0.00209035	4.57619e+07	0.0033415	5.92594e+07	0.00380929	5.05351e+07	0.00455633
Csa_010417494.1	PREDICTED: epidermis-specific secreted glycoprotein EP1-like [Camelina sativa]	0	27	4	443		0	4.75268e+07	0.00495066	1.72978e+07	0.00194995	4.93538e+07	0.0043278	6.9981e+07	0.00540225	4.68271e+07	0.00507022
Csa_010412819.1	PREDICTED: 40S ribosomal protein S2-4 [Camelina sativa]	0	18	0	288		0	82513387	0.0132209	3.25745e+07	0.00564838	6.78583e+07	0.00915294	49433132	0.00586981	4.37667e+07	0.00728929
Csa_010435343.1	PREDICTED: 40S ribosomal protein S13-2 [Camelina sativa]	0	64	1	151		0	8708743	0.00266138		0		0		0		0
Csa_010432252.1	PREDICTED: phosphoserine aminotransferase 1, chloroplastic-like [Camelina sativa]	0	15	5	432		0	3.19295e+07	0.00341064	9.50793e+06	0.00109911	31823654	0.00286165	54335386	0.00430127	3.29601e+07	0.00365964
Csa_010463355.1	PREDICTED: formate--tetrahydrofolate ligase-like [Camelina sativa]	0	26	0	335		0	5.88991e+07	0.0081132	3.38674e+07	0.00504866	7.82606e+07	0.00907503	7.33099e+07	0.0074837	7.28566e+07	0.0104318
Csa_010512766.1	PREDICTED: protein transport protein SEC31 homolog B isoform X1 [Camelina sativa]	0	26	8	1106		0	4.07452e+07	0.0017	3.23096e+07	0.00145886	6.5643e+07	0.00230559	86273029	0.00266758	5.8069e+07	0.00251839
Csa_010435389.1	PREDICTED: bifunctional purple acid phosphatase 26 [Camelina sativa]	0	17	4	475		0	2.20152e+07	0.00213874	1.31059e+07	0.00137789	3.06323e+07	0.00250516	2.87307e+07	0.00206847	20564335	0.00207661
Csa_019096120.1	PREDICTED: 40S ribosomal protein S5-2-like [Camelina sativa]	0	57	1	128		0	116877098	0.0421354	63408472	0.0247386	9.78439e+07	0.0296943	7.43832e+07	0.019873	67769850	0.0253957
Csa_010423685.1	PREDICTED: monodehydroascorbate reductase 2-like [Camelina sativa]	0	22	6	435		0	26519459	0.00281322	1.34283e+07	0.0015416	1.6356e+07	0.00146063	56289022	0.0044252	2.40282e+07	0.00264951
Csa_010427613.1	PREDICTED: villin-3-like [Camelina sativa]	0	20	5	965		0	3.95971e+07	0.00189349	2.96378e+07	0.00153376	52099887	0.00209729	5.70871e+07	0.00202306	34289648	0.00170439
Csa_010506246.1	PREDICTED: peptidyl-prolyl cis-trans isomerase FKBP16-3, chloroplastic [Camelina sativa]	0	20	5	231		0	31381809	0.00626894	4.20442e+07	0.00908934	3.67515e+07	0.00618035	45337023	0.0067118	2.59247e+07	0.00538313
Csa_010415777.1	PREDICTED: MLP-like protein 28 [Camelina sativa]	0	20	0	163		0		0	609539	0.000186747	3.91149e+06	0.000932189	5643094	0.00118393	4965503	0.0014612
Csa_010512631.1	PREDICTED: calvin cycle protein CP12-2, chloroplastic-like [Camelina sativa]	0	28	2	131		0	2.2586e+07	0.00795603	32828805	0.0125148	2.304e+07	0.00683221	29600415	0.00772724	31182955	0.0114177
Csa_010443314.1	PREDICTED: asparagine--tRNA ligase, cytoplasmic 1-like [Camelina sativa]	0	24	5	570		0	5.91475e+07	0.00478839	2.1899e+07	0.00191862	5.01037e+07	0.00341464	7.88987e+07	0.00473362	5.69694e+07	0.00479403
Csa_010475984.1	PREDICTED: ferredoxin-1, chloroplastic-like [Camelina sativa]	0	7	1	145		0	1.09019e+07	0.00346945	23908840	0.00823434	13009965	0.00348544	7.25111e+06	0.00171015	8.75757e+06	0.00289701
Csa_010412980.1	PREDICTED: xyloglucan endotransglucosylase/hydrolase protein 4 [Camelina sativa]	0	28	8	296		0	5.04848e+07	0.0078704	2.612e+07	0.00440676	6.02684e+07	0.00790947	6.98662e+07	0.00807185	4.31842e+07	0.00699789
Csa_010420501.1	PREDICTED: uncharacterized protein LOC104706070 [Camelina sativa]	0	54	3	323		0	5.65812e+07	0.00808346	4.25199e+07	0.00657398	5.81267e+07	0.00699073	1.05938e+08	0.0112162	5.80436e+07	0.00861958
Csa_010463529.1	PREDICTED: V-type proton ATPase subunit G1 [Camelina sativa]	0	16	3	110		0	4.2241e+07	0.0177203	1.99435e+07	0.00905413	4.8128e+07	0.0169963	5.59143e+07	0.0173831	4.80709e+07	0.0209616
Csa_010452950.1	PREDICTED: heat shock 70 kDa protein 10, mitochondrial [Camelina sativa]	0	19	7	685		0	3.19124e+07	0.0021498	1.32591e+07	0.000966634	3.05977e+07	0.00173519	4.53181e+07	0.00226245	2.79343e+07	0.00195606
Csa_010415773.1	PREDICTED: MLP-like protein 28 isoform X1 [Camelina sativa]	0	39	1	320		0	2.9793e+07	0.00429628	4.22671e+07	0.00659615	9.17059e+07	0.0111326	5.34595e+07	0.00571311	3.96234e+07	0.0059393
Csa_010413439.1	PREDICTED: DEAD-box ATP-dependent RNA helicase 12 isoform X1 [Camelina sativa]	0	14	0	524		0	9.24913e+06	0.000814512	682431	6.50378e-05	6.67417e+06	0.000494784	7.9356e+06	0.0005179	7.58612e+06	0.00069442
Csa_010512458.1	PREDICTED: DEAD-box ATP-dependent RNA helicase 12 [Camelina sativa]	0	14	0	502		0	9.24913e+06	0.000850208	682431	6.78881e-05	6.67417e+06	0.000516468	7.9356e+06	0.000540597	7.58612e+06	0.000724853
Csa_010435909.1	PREDICTED: glutaredoxin-C2 [Camelina sativa]	0	39	3	111		0	1.25757e+08	0.0522803	1.73413e+08	0.0780185	1.41334e+08	0.0494623	1.34264e+08	0.0413651	1.03144e+08	0.0445714
Csa_010499669.1	PREDICTED: phosphatase IMPL1, chloroplastic [Camelina sativa]	0	14	4	372		0	1.83251e+07	0.00227316	1.3993e+07	0.00187848	3.17086e+07	0.00331119	2.82762e+07	0.00259942	2.67057e+07	0.00344346
Csa_010459371.1	PREDICTED: glyoxylate/succinic semialdehyde reductase 2, chloroplastic [Camelina sativa]	0	13	5	368		0	3.95656e+07	0.00496133	3.8255e+07	0.00519133	38027756	0.00401423	5.12157e+07	0.00475941	3.10558e+07	0.00404789
Csa_010464238.1	PREDICTED: uncharacterized protein LOC104744797 [Camelina sativa]	0	26	4	235		0	2.7896e+07	0.00547775	4.36555e+07	0.00927704	3.15214e+07	0.00521059	7.10434e+07	0.0103384	3.94104e+07	0.0080441
Csa_010427020.1	PREDICTED: histone H2B.4 [Camelina sativa]	0	217	0	140		0		0		0		0		0		0
Csa_010466725.1	PREDICTED: uncharacterized protein LOC104746881 [Camelina sativa]	0	18	4	393		0	2.73476e+07	0.0032111	1.70134e+07	0.00216191	3.85843e+07	0.00381389	45653839	0.00397267	4.39246e+07	0.00536105
Csa_010415588.1	PREDICTED: eukaryotic translation initiation factor 5A-3 [Camelina sativa]	0	43	0	158		0	4.27096e+08	0.124737	1.43531e+08	0.0453656	2.07029e+08	0.0509007	2.51719e+08	0.0544824	1.97616e+08	0.0599926
Csa_010427867.1	PREDICTED: uncharacterized protein LOC104712634 [Camelina sativa]	0	20	6	610		0	4.22432e+07	0.00319562	1.42643e+07	0.00116778	3.62795e+07	0.00231037	7.80355e+07	0.00437482	6.00544e+07	0.00472225
Csa_019095963.1	PREDICTED: 40S ribosomal protein S28-1-like [Camelina sativa]	0	28	0	99		0	1.79526e+08	0.0836797	155860374	0.0786211	1.62272e+08	0.0636734	1.38189e+08	0.0477351	1.24822e+08	0.0604769
Csa_010423655.1	PREDICTED: uncharacterized protein LOC104708739 isoform X1 [Camelina sativa]	0	28	0	141		0	1.79526e+08	0.0587538	155860374	0.055202	1.62272e+08	0.0447069	1.38189e+08	0.0335161	1.24822e+08	0.0424625
Csa_010427436.1	PREDICTED: alpha-soluble NSF attachment protein 2 [Camelina sativa]	0	18	7	289		0	2.69417e+07	0.00430185	8.71738e+06	0.00150635	2.96573e+07	0.00398642	4.78064e+07	0.00565701	3.03696e+07	0.00504052
Csa_010518131.1	PREDICTED: 14 kDa proline-rich protein DC2.15-like [Camelina sativa]	0	35	2	134		0	8.56246e+07	0.0294864	4.22953e+07	0.0157625	94391027	0.0273638	108953692	0.0278058	9.76686e+07	0.034961
Csa_010490328.1	PREDICTED: 60S acidic ribosomal protein P0-like [Camelina sativa]	0	11	0	127		0	1.53946e+07	0.00559362	6625435	0.00260525	9.75579e+06	0.00298407	9.08387e+06	0.00244605	7065561	0.00266856
Csa_010435064.1	PREDICTED: proteasome subunit beta type-2-B-like isoform X1 [Camelina sativa]	0	12	2	204		0	5.94866e+07	0.013456	1.1002e+07	0.00269328	4.76515e+07	0.00907395	56928428	0.00954327	4.06703e+07	0.0095627
Csa_010458622.1	PREDICTED: pyrophosphate--fructose 6-phosphate 1-phosphotransferase subunit beta 1 [Camelina sativa]	0	20	4	567		0	4.68094e+07	0.00380959	1.30207e+07	0.00114681	4.69706e+07	0.00321805	69306053	0.0041801	4.67979e+07	0.00395892
Csa_010442091.1	PREDICTED: thioredoxin H3-like [Camelina sativa]	0	17	4	117		0	7.31798e+07	0.0288625	31519550	0.0134534	73508572	0.0244063	6.09445e+07	0.0178134	4.56702e+07	0.0187232
Csa_010426401.1	PREDICTED: oxalate--CoA ligase [Camelina sativa]	0	21	7	514		0	7.35151e+07	0.00659996	2.63345e+07	0.00255859	5.46152e+07	0.00412762	8.5671e+07	0.00569992	6.61607e+07	0.00617406
Csa_010436973.1	PREDICTED: subtilisin-like protease SBT3.9 isoform X1 [Camelina sativa]	0	18	3	758		0	2.84074e+07	0.00172938	1.44606e+07	0.000952698	3.19609e+07	0.00163795	4.00736e+07	0.00180795	21468512	0.00135852
Csa_010415645.1	PREDICTED: alpha-amylase 3, chloroplastic [Camelina sativa]	0	13	8	900		0	5.69232e+07	0.0029186	1.9521e+07	0.00108317	3.0269e+07	0.00130649	3.56753e+07	0.00135558	4.25581e+07	0.00226816
Csa_019082344.1	PREDICTED: DEAD-box ATP-dependent RNA helicase 37 isoform X1 [Camelina sativa]	0	32	2	626		0	3.14363e+07	0.00231731	1.99882e+07	0.00159455	4.97155e+07	0.00308508	8.13402e+07	0.00444354	4.381e+07	0.00335686
Csa_010460344.1	PREDICTED: serine/threonine-protein phosphatase 2A 65 kDa regulatory subunit A alpha isoform [Camelina sativa]	0	26	3	588		0	6.95141e+07	0.00545536	2.33872e+07	0.00198627	6.66088e+07	0.00440052	7.56685e+07	0.00440085	4.97885e+07	0.00406149
Csa_010414200.1	PREDICTED: uncharacterized protein LOC104700380 [Camelina sativa]	0	11	4	167		0	1.1302e+07	0.00312296	7.00926e+06	0.00209601	1.75243e+07	0.00407638	2.35964e+07	0.00483201	19891264	0.00571321
Csa_010457873.1	PREDICTED: 6-phosphofructo-2-kinase/fructose-2,6-bisphosphatase isoform X1 [Camelina sativa]	0	21	10	745		0	3.52016e+07	0.00218039	3.60304e+07	0.00241519	38875447	0.00202707	6.1827e+07	0.00283805	4.61972e+07	0.00297436
Csa_010413513.1	PREDICTED: proteasome subunit beta type-1 [Camelina sativa]	0	23	6	223		0	5.18342e+07	0.010726	6.50232e+07	0.0145614	7.70162e+07	0.0134161	1.16267e+08	0.01783	8.30497e+07	0.0178635
Csa_010428776.1	PREDICTED: psbP domain-containing protein 4, chloroplastic [Camelina sativa]	0	16	4	262		0	1.20032e+07	0.0021141	2.67497e+07	0.00509867	2.36875e+07	0.00351211	1.11946e+07	0.00146119	6.83652e+06	0.00125161
Csa_010414698.1	PREDICTED: dynamin-2B-like [Camelina sativa]	0	20	1	919		0	4.07786e+07	0.0020476	1.94393e+07	0.00105634	3.91535e+07	0.00165503	4.67274e+07	0.00173882	3.3792e+07	0.00176373
Csa_010443529.1	PREDICTED: phototropin-2 [Camelina sativa]	0	12	4	906		0	1.09331e+07	0.000556858	8.3058e+06	0.000457817	2.12977e+07	0.000913175	24507242	0.000925048	4.43523e+07	0.00234813
Csa_010470028.1	PREDICTED: outer envelope pore protein 16-1, chloroplastic-like isoform X1 [Camelina sativa]	0	7	2	162		0	9.91244e+06	0.00282354	7.25789e+06	0.00223735	3.87444e+06	0.000929059	2.37533e+06	0.000501427	2.75874e+06	0.000816827
Csa_010419878.1	PREDICTED: photosynthetic NDH subunit of lumenal location 5, chloroplastic [Camelina sativa]	0	36	5	259		0	5.25993e+07	0.00937148	4.20387e+07	0.00810564	6.1262e+07	0.00918843	7.04873e+07	0.00930699	5.23308e+07	0.00969152
Csa_010422832.1	PREDICTED: probable cytosolic oligopeptidase A [Camelina sativa]	0	17	0	701		0	9.33284e+06	0.000614361	4.62545e+06	0.000329514	6.91981e+06	0.000383466	1.46248e+07	0.000713459	7.58294e+06	0.000518864
Csa_010430165.1	PREDICTED: 60S ribosomal protein L3-2-like [Camelina sativa]	0	40	1	390		0	1.63538e+06	0.000193501	924993	0.000118444		0	3.46602e+06	0.000303923	1.33183e+06	0.000163802
Csa_010416676.1	PREDICTED: profilin-1-like [Camelina sativa]	0	38	4	131		0	4.58545e+07	0.0161525	2.07994e+07	0.007929	3.40148e+07	0.0100866	5.06594e+07	0.0132247	3.14108e+07	0.0115012
Csa_010418124.1	PREDICTED: mitochondrial import inner membrane translocase subunit TIM13-like [Camelina sativa]	0	13	3	86		0	9.81361e+06	0.00526573	1.05838e+07	0.00614584	1.53795e+07	0.00694692	2.46441e+07	0.0097997	1.86561e+07	0.0104054
Csa_010417407.1	PREDICTED: 3-ketoacyl-CoA synthase 10 isoform X1 [Camelina sativa]	0	16	7	550		0	2.81193e+07	0.00235923	1.76368e+07	0.00160139	2.0639e+07	0.00145773	4.29129e+07	0.00266823	2.01672e+07	0.0017588
Csa_010415760.1	PREDICTED: probable phosphoglucomutase, cytoplasmic 2 [Camelina sativa]	0	30	0	585		0	9.9512e+07	0.0078496	5.91499e+07	0.00504936	1.03869e+08	0.00689734	150565088	0.0088017	9.78599e+07	0.00802385
Csa_010428909.1	PREDICTED: probable beta-D-xylosidase 7 isoform X1 [Camelina sativa]	0	24	6	766		0	1.57486e+07	0.000948728	6.93511e+06	0.00045213	1.93747e+07	0.000982555	2.37326e+07	0.00105953	1.32396e+07	0.000829048
Csa_010452406.1	PREDICTED: coatomer subunit delta [Camelina sativa]	0	19	6	526		0	2.07881e+07	0.00182371	3.53852e+07	0.0033595	2.37844e+07	0.00175654	3.70203e+07	0.00240687	4.36449e+07	0.00397999
Csa_010479309.1	PREDICTED: chorismate synthase, chloroplastic-like [Camelina sativa]	0	23	7	436		0	3.88433e+07	0.0041111	1.24295e+07	0.00142366	3.78303e+07	0.00337057	4.71971e+07	0.00370192	3.66916e+07	0.00403659
Csa_019084952.1	PREDICTED: MLP-like protein 28 isoform X2 [Camelina sativa]	0	19	0	147		0		0	609539	0.000207073	3.91149e+06	0.00103365	5643094	0.0013128	4965503	0.00162024
Csa_010417155.1	PREDICTED: 40S ribosomal protein S11-1 isoform X2 [Camelina sativa]	0	43	1	131		0	15389168	0.00542091		0	66919.6	1.98441e-05	25413.8	6.63432e-06	99820.7	3.65496e-05
Csa_010419712.1	PREDICTED: uncharacterized protein LOC104705408 [Camelina sativa]	0	65	1	367		0	3.60414e+06	0.000453173	1.5735e+06	0.000214111	3.60879e+06	0.000381984		0		0
Csa_010443683.1	PREDICTED: non-specific lipid-transfer protein 4-like [Camelina sativa]	0	74	4	112		0	8.83599e+07	0.0364053	1.33274e+08	0.0594245	1.0668e+08	0.037001	1.53661e+08	0.0469185	1.21966e+08	0.0522342
Csa_010483522.1	PREDICTED: 40S ribosomal protein S8-2 [Camelina sativa]	0	73	1	220		0	10301885	0.00216084	6.62635e+06	0.00150415	4.15701e+06	0.00073402	7758060	0.00120595	2788712	0.000608016
Csa_010450213.1	PREDICTED: tubulin beta-4B chain-like isoform X1 [Camelina sativa]	0	10	0	144		0	60999481	0.0195475	2.50115e+07	0.00867393	73809374	0.0199113	68450762	0.016256	67056062	0.0223362
Csa_010450214.1	PREDICTED: tubulin beta-4B chain-like isoform X2 [Camelina sativa]	0	10	0	134		0	60999481	0.0210063	2.50115e+07	0.00932124	73809374	0.0213972	68450762	0.0174691	67056062	0.0240031
Csa_010450215.1	PREDICTED: tubulin beta-4 chain-like isoform X3 [Camelina sativa]	0	10	0	125		0	60999481	0.0225187	2.50115e+07	0.00999237	73809374	0.0229378	68450762	0.0187269	67056062	0.0257313
Csa_010476258.1	PREDICTED: uncharacterized protein LOC104755556 [Camelina sativa]	0	19	7	779		0	4.84989e+07	0.00287292	2.32096e+07	0.00148788	5.07327e+07	0.00252988	5.93828e+07	0.00260688	4.2696e+07	0.00262896
Csa_010444468.1	PREDICTED: annexin D2-like [Camelina sativa]	0	15	7	317		0	6.67953e+07	0.00972332	2.63508e+07	0.0041512	4.66956e+07	0.00572225	7.16802e+07	0.00773282	4.22096e+07	0.00638683
Csa_010420086.1	PREDICTED: delta(24)-sterol reductase-like [Camelina sativa]	0	36	0	511		0	7.99158e+07	0.00721672	3.03481e+07	0.00296585	7.17555e+07	0.00545487	8.54316e+07	0.00571736	7.02221e+07	0.00659154
Csa_010466145.1	PREDICTED: delta(24)-sterol reductase [Camelina sativa]	0	36	0	561		0	7.99158e+07	0.00657352	3.03481e+07	0.00270152	7.17555e+07	0.0049687	8.54316e+07	0.0052078	7.02221e+07	0.00600406
Csa_010505480.1	PREDICTED: non-specific lipid-transfer protein 1-like [Camelina sativa]	0	50	3	121		0	1.56683e+08	0.0597536	6.71083e+07	0.0276968	185501016	0.059554	2.15822e+08	0.0609969	2.01737e+08	0.0799713
Csa_010503640.1	PREDICTED: coatomer subunit beta'-3 [Camelina sativa]	0	27	0	919		0		0		0		0		0		0
Csa_010418304.1	PREDICTED: bifunctional dTDP-4-dehydrorhamnose 3,5-epimerase/dTDP-4-dehydrorhamnose reductase [Camelina sativa]	0	9	5	304		0	6.33764e+07	0.00962015	1.8813e+07	0.00309046	5.07053e+07	0.00647933	7.60654e+07	0.00855681	55794404	0.00880341
Csa_019083920.1	PREDICTED: uncharacterized protein LOC109125851 [Camelina sativa]	0	14	4	76		0	1.80343e+07	0.01095	7.29084e+06	0.00479074	1.57924e+07	0.00807206	1.54074e+07	0.0069329	2.51006e+07	0.0158418
Csa_010462768.1	PREDICTED: eukaryotic peptide chain release factor GTP-binding subunit ERF3A [Camelina sativa]	0	19	0	434		0	3.87408e+07	0.00411915	2.22147e+07	0.00255617	3.52002e+07	0.00315068	3.34946e+07	0.00263927	3.50492e+07	0.00387367
Csa_010460826.1	PREDICTED: CSC1-like protein ERD4 isoform X2 [Camelina sativa]	0	14	6	725		0	2.87361e+07	0.00182901	5.48766e+06	0.000377996	1.57892e+07	0.000846001	1.24751e+07	0.000588443	1.20919e+07	0.0008
Csa_019089818.1	PREDICTED: 1,2-dihydroxy-3-keto-5-methylthiopentene dioxygenase 2-like isoform X1 [Camelina sativa]	0	18	0	202		0	27617625	0.00630904	1.98997e+07	0.00491964	3.6322e+07	0.00698503	4.69577e+07	0.00794974	4.10138e+07	0.00973895
Csa_010466775.1	PREDICTED: glutathione reductase, cytosolic-like [Camelina sativa]	0	13	5	496		0	36934347	0.00343619	4.86756e+07	0.00490081	4.19435e+07	0.00328498	4.8275e+07	0.00332843	4.68441e+07	0.0045301
Csa_010434495.1	PREDICTED: ras-related protein RABA1d [Camelina sativa]	0	45	1	214		0	1.61715e+07	0.00348709	9.02353e+06	0.00210572	2.26822e+07	0.00411738	3.0838e+07	0.004928	2.77372e+07	0.00621703
Csa_010459703.1	PREDICTED: 26S proteasome non-ATPase regulatory subunit 3 homolog A [Camelina sativa]	0	17	2	488		0	4.74253e+06	0.000448454		0	5.50061e+06	0.000437866	8351701	0.000585266	4.47633e+06	0.000439983
Csa_010418664.1	PREDICTED: 60S ribosomal protein L37a-1-like, partial [Camelina sativa]	0	42	1	141		0	1.12374e+08	0.036777	4.72033e+07	0.0167183	1.24239e+08	0.0342285	167438517	0.0406101	1.16803e+08	0.0397346
Csa_010420707.1	PREDICTED: stem-specific protein TSJT1 [Camelina sativa]	0	13	4	234		0	3.13339e+07	0.00617913	2.40727e+07	0.00513744	2.47437e+07	0.0041077	15980140	0.00233541	1.89451e+07	0.00388342
Csa_010470237.1	PREDICTED: thionin isoform X4 [Camelina sativa]	0	19	0	130		0	3.85891e+07	0.0136978	43518669	0.0167175	6.83732e+07	0.0204311	3.45907e+07	0.00909943	3.41297e+06	0.00125928
Csa_010470234.1	PREDICTED: thionin isoform X1 [Camelina sativa]	0	19	0	133		0	3.85891e+07	0.0133888	43518669	0.0163404	6.83732e+07	0.0199703	3.45907e+07	0.00889418	3.41297e+06	0.00123088
Csa_010444307.1	PREDICTED: ultraviolet-B receptor UVR8 [Camelina sativa]	0	20	4	440		0	1.85853e+07	0.00194915	6.96038e+06	0.000789985	1.24452e+07	0.00109875	2.05881e+07	0.00160016	1.49227e+07	0.00162678
Csa_010421597.1	PREDICTED: uncharacterized protein LOC104707044 [Camelina sativa]	0	3	3	341		0	4.36234e+06	0.000590328	3.07776e+06	0.000450732	7117939	0.000810867	10838599	0.00108697	8373273	0.00117781
Csa_010426963.1	PREDICTED: phenylalanine ammonia-lyase 2-like [Camelina sativa]	0	16	3	718		0	8.40355e+06	0.000540091	4.3603e+06	0.000303271	7.81676e+06	0.000422914	8.77756e+06	0.000418068	8.45533e+06	0.000564859
Csa_010440286.1	PREDICTED: 1-deoxy-D-xylulose-5-phosphate synthase, chloroplastic-like [Camelina sativa]	0	16	4	722		0	30776531	0.00196703	2.55639e+07	0.00176819	2.88278e+07	0.00155104	4.62044e+07	0.00218849	2.6117e+07	0.00173508
Csa_010467159.1	PREDICTED: 36.4 kDa proline-rich protein-like [Camelina sativa]	0	70	2	298		0	1.75041e+08	0.0271051	119630328	0.0200476	172792538	0.0225247	2.41143e+08	0.027673	1.95167e+08	0.031414
Csa_010507785.1	PREDICTED: protein disulfide-isomerase like 2-1-like [Camelina sativa]	0	16	0	186		0		0		0		0		0		0
Csa_010425467.1	PREDICTED: cytochrome c1 1, heme protein, mitochondrial [Camelina sativa]	0	16	0	307		0	3.65951e+06	0.000550064	1.48184e+06	0.000241047	4486234	0.000567667	12318547	0.00137221	5.53225e+06	0.000864366
Csa_019099606.1	PREDICTED: cytochrome c1 1, heme protein, mitochondrial-like [Camelina sativa]	0	16	0	307		0	3.65951e+06	0.000550064	1.48184e+06	0.000241047	4486234	0.000567667	12318547	0.00137221	5.53225e+06	0.000864366
Csa_010428964.1	PREDICTED: glutathione S-transferase U19-like [Camelina sativa]	0	19	5	219		0	54049821	0.0113888	5.99405e+07	0.0136683	9.41634e+07	0.0167027	3.59489e+07	0.00561357	3.45848e+07	0.00757486
Csa_010421473.1	PREDICTED: 50S ribosomal protein L15, chloroplastic-like [Camelina sativa]	0	34	1	107		0	772340	0.000333083	251318	0.000117295	400789	0.000145506	1.08149e+06	0.00034565	334088	0.000149765
Csa_010488912.1	PREDICTED: proteasome subunit alpha type-5-A-like isoform X3 [Camelina sativa]	0	27	0	99		0	9.17362e+07	0.0427596	4.84504e+07	0.02444	1.14872e+08	0.0450741	1.65678e+08	0.0572304	1.40665e+08	0.0681531
Csa_010488911.1	PREDICTED: proteasome subunit alpha type-5-A-like isoform X2 [Camelina sativa]	0	27	0	113		0	9.17362e+07	0.0374619	4.84504e+07	0.021412	1.14872e+08	0.0394897	1.65678e+08	0.0501399	1.40665e+08	0.0597094
Csa_010488910.1	PREDICTED: proteasome subunit alpha type-5-A-like isoform X1 [Camelina sativa]	0	27	0	144		0	9.17362e+07	0.0293972	4.84504e+07	0.0168025	1.14872e+08	0.0309885	1.65678e+08	0.0393459	1.40665e+08	0.0468553
Csa_010413584.1	PREDICTED: 60S ribosomal protein L37a-2-like [Camelina sativa]	0	43	1	92		0	26090620	0.0130865	10081409	0.00547232	22633872	0.00955699	40006348	0.014871	21582388	0.0112524
Csa_019082600.1	PREDICTED: GTP-binding protein SAR1B-like [Camelina sativa]	0	9	0	166		0	2.34323e+07	0.00651379	9.17003e+06	0.00275868	1.93762e+07	0.0045343	1.60277e+07	0.00330188	1.16942e+07	0.00337905
Csa_019097405.1	PREDICTED: alanine--tRNA ligase, chloroplastic/mitochondrial-like [Camelina sativa]	0	17	1	891		0	3314334	0.000171651	3.70565e+06	0.000207695	5.0025e+06	0.000218102	5.65634e+06	0.000217098	5057103	0.000272244
Csa_019086912.1	PREDICTED: linolenate hydroperoxide lyase, chloroplastic isoform X1 [Camelina sativa]	0	20	8	528		0	2.11508e+07	0.00184851	1.15559e+07	0.00109297	2.0676e+07	0.00152119	2.58237e+07	0.00167256	1.77622e+07	0.0016136
Csa_010511531.1	PREDICTED: proteasome subunit beta type-2-A [Camelina sativa]	0	13	0	205		0	3.16975e+07	0.00713509	1.1002e+07	0.00268014	4.29294e+07	0.00813488	4.8062e+07	0.00801763	3.65269e+07	0.00854658
Csa_010475828.1	PREDICTED: ATP phosphoribosyltransferase 2, chloroplastic [Camelina sativa]	0	14	5	410		0	1.66285e+07	0.00187153	1.1532e+07	0.00140463	4.14837e+07	0.00393046	3.60414e+07	0.00300618	3.59279e+07	0.00420321
Csa_010417113.1	PREDICTED: uncharacterized protein LOC104702890 [Camelina sativa]	0	14	1	167		0	4.26474e+07	0.0117843	3.05685e+07	0.00914105	40866079	0.00950597	2.71785e+07	0.00556555	27182131	0.0078073
Csa_010427149.1	PREDICTED: uridine 5'-monophosphate synthase-like [Camelina sativa]	0	22	6	476		0	3.60003e+07	0.00349002	2.66095e+07	0.0027917	5.02857e+07	0.00410381	102636944	0.00737386	8.4941e+07	0.00855942
Csa_010416366.1	PREDICTED: pathogenesis-related protein 5-like [Camelina sativa]	0	19	4	240		0	1.18933e+07	0.00228675	1.514e+07	0.00315031	2.39498e+07	0.0038765	5.64131e+07	0.00803835	1.2449e+07	0.00248803
Csa_010432374.1	PREDICTED: UPF0051 protein ABCI8, chloroplastic-like [Camelina sativa]	0	15	4	552		0	1.57888e+07	0.0013199	16513686	0.00149398	1.79565e+07	0.00126367	25123227	0.00155645	1.81625e+07	0.00157823
Csa_010421305.1	PREDICTED: protein RETICULATA-RELATED 1, chloroplastic-like [Camelina sativa]	0	17	5	520		0	2.48422e+07	0.00220453	1.49591e+07	0.00143661	2.43734e+07	0.00182081	33557157	0.00220689	24802456	0.00228784
Csa_010515749.1	PREDICTED: cell division protein FtsZ homolog 2-2, chloroplastic-like isoform X1 [Camelina sativa]	0	9	1	476		0	1.34242e+06	0.00013014	1.42331e+06	0.000149325	2.2719e+06	0.00018541	520385	3.73866e-05	471090	4.74712e-05
Csa_010461368.1	PREDICTED: nitrate reductase [NADH] 2 [Camelina sativa]	0	37	10	917		0	3.97546e+07	0.00200054	4.00217e+07	0.00217954	68216916	0.00288983	8.69468e+07	0.00324252	6.14918e+07	0.00321649
Csa_010514580.1	PREDICTED: V-type proton ATPase subunit d1-like [Camelina sativa]	0	17	5	365		0	4.14704e+07	0.00524292	48959029	0.00669851	5.9886e+07	0.00637356	6.83168e+07	0.00640078	5.05761e+07	0.0066464
Csa_019093978.1	PREDICTED: ATPase 9, plasma membrane-type isoform X1 [Camelina sativa]	0	28	0	925		0	2.2854e+07	0.00114012	1.9735e+07	0.00106545	8.43054e+07	0.00354049	1.20218e+08	0.00444455	8.42254e+07	0.00436752
Csa_010470517.1	PREDICTED: probable fructokinase-6, chloroplastic [Camelina sativa]	0	21	5	387		0	4.75967e+07	0.00567537	30920544	0.00399002	4.06864e+07	0.00408402	5.7533e+07	0.00508398	37466636	0.00464374
Csa_010427880.1	PREDICTED: MLP-like protein 43 isoform X2 [Camelina sativa]	0	37	2	290		0	5003577	0.000796179		0	2.69794e+06	0.000361397	2.09507e+07	0.00247057	13687992	0.002264
Csa_010504808.1	PREDICTED: DEAD-box ATP-dependent RNA helicase 11 [Camelina sativa]	0	32	2	609		0	1.17309e+07	0.000888878	2.88908e+06	0.000236909	9978998	0.000636531	17344323	0.000973953	15984639	0.00125898
Csa_010417783.1	PREDICTED: glyoxylate/hydroxypyruvate reductase A HPR2-like [Camelina sativa]	0	27	6	313		0	2.30967e+07	0.00340513	2.30398e+07	0.00367598	3.62107e+07	0.0044941	3.60363e+07	0.00393726	3.03739e+07	0.00465468
Csa_010472717.1	PREDICTED: epidermis-specific secreted glycoprotein EP1-like [Camelina sativa]	0	22	4	456		0	2.63473e+07	0.00266624	3.74867e+07	0.00410535	3.19837e+07	0.00272467	3.1689e+07	0.00237652	1.91158e+07	0.00201077
Csa_019094404.1	PREDICTED: valine--tRNA ligase, mitochondrial 1-like [Camelina sativa]	0	14	1	1057		0	429603	1.87552e-05		0		0		0		0
Csa_010472697.1	PREDICTED: 50S ribosomal protein L13, chloroplastic [Camelina sativa]	0	13	3	243		0	2.43836e+07	0.00463041	1.08851e+07	0.00223699	1.6445e+07	0.00262893	2.94493e+06	0.000414445	8.78784e+06	0.00173464
Csa_010481942.1	PREDICTED: proteasome subunit alpha type-1-A isoform X1 [Camelina sativa]	0	18	1	278		0	12293833	0.00204066	7752686	0.00139266	12446933	0.00173927	15043037	0.0018505	7775242	0.00134154
Csa_010440503.1	PREDICTED: beta-D-xylosidase 1 [Camelina sativa]	0	18	1	775		0	2.83964e+07	0.00169079	3.15631e+07	0.00203384	3.66789e+07	0.0018385	4.39331e+07	0.0019386	3.40582e+07	0.00210792
Csa_010480432.1	PREDICTED: aspartyl protease family protein 2-like [Camelina sativa]	0	23	5	488		0	2.96954e+07	0.002808	1.93841e+07	0.00198364	3.17948e+07	0.00253097	5.70902e+07	0.00400074	2.97357e+07	0.00292275
Csa_010419603.1	PREDICTED: NAD-dependent malic enzyme 2, mitochondrial-like [Camelina sativa]	0	7	5	608		0	12229483	0.000928181	7.00229e+06	0.000575141	1.694e+07	0.00108233	2.38604e+07	0.00134206	17830928	0.00140671
Csa_010426495.1	PREDICTED: uncharacterized protein At3g49720 [Camelina sativa]	0	19	4	261		0	5.90341e+07	0.0104374	38179025	0.00730504	58571666	0.0087176	6.64204e+07	0.0087028	6.05057e+07	0.0111196
Csa_010478024.1	PREDICTED: 3-oxoacyl-[acyl-carrier-protein] reductase, chloroplastic-like isoform X1 [Camelina sativa]	0	20	1	320		0	192302	2.77307e-05		0		0		0		0
Csa_010505700.1	PREDICTED: eukaryotic translation initiation factor 3 subunit F [Camelina sativa]	0	23	4	293		0	3.00872e+07	0.00473852	1.36771e+07	0.00233111	4.39777e+07	0.00583062	5.87909e+07	0.00686184	4.2367e+07	0.00693576
Csa_010484303.1	PREDICTED: asparagine synthetase [glutamine-hydrolyzing] 2 isoform X1 [Camelina sativa]	0	27	4	589		0	5.97463e+07	0.00468084	8.02354e+07	0.00680282	1.3433e+08	0.00885945	1.39823e+08	0.00811825	1.48102e+08	0.0120609
Csa_010466579.1	PREDICTED: stem-specific protein TSJT1 [Camelina sativa]	0	20	4	248		0	2.0509e+07	0.00381611	1.73653e+07	0.00349678	2.87604e+07	0.00450499	3.44498e+07	0.00475043	24325607	0.00470485
Csa_010455043.1	PREDICTED: threonine--tRNA ligase, mitochondrial 1 [Camelina sativa]	0	22	6	716		0	4.7041e+07	0.00303174	2.1888e+07	0.00152662	4.69976e+07	0.00254984	5.74456e+07	0.00274373	45526985	0.00304993
Csa_010442830.1	PREDICTED: probable NADH dehydrogenase [ubiquinone] 1 alpha subcomplex subunit 5, mitochondrial [Camelina sativa]	0	11	4	170		0	1.41052e+07	0.00382877	2.32272e+07	0.00682316	3.21252e+07	0.00734086	2.29804e+07	0.00462283	2.18923e+07	0.00617699
Csa_019085999.1	PREDICTED: protease Do-like 1, chloroplastic isoform X1 [Camelina sativa]	0	26	5	448		0	4.05623e+07	0.00417804	5.05833e+07	0.00563855	6.92436e+07	0.00600415	6.72325e+07	0.00513215	5.2055e+07	0.00557337
Csa_010442925.1	PREDICTED: cytochrome b5 [Camelina sativa]	0	7	5	134		0	1.08944e+07	0.00375169	7.16018e+06	0.00266844	9.25319e+06	0.00268248	2.81513e+07	0.00718442	1.21452e+07	0.00434744
Csa_010416905.1	PREDICTED: uncharacterized protein LOC104702696 [Camelina sativa]	0	37	4	206		0	4.58419e+07	0.0102689	6.48242e+07	0.0157148	7.17905e+07	0.0135378	4.02086e+07	0.00667497	3.16133e+07	0.00736099
Csa_010419745.1	PREDICTED: NADP-dependent malic enzyme 2 isoform X1 [Camelina sativa]	0	20	4	589		0	43576421	0.00341401	2.7103e+07	0.00229795	39796804	0.00262472	4.23324e+07	0.00245785	3.97705e+07	0.00323877
Csa_010447638.1	PREDICTED: omega-6 fatty acid desaturase, chloroplastic [Camelina sativa]	0	21	5	446		0	5.56328e+07	0.00575604	3.65836e+07	0.00409628	5.1175e+07	0.00445731	52810529	0.00404934	43397946	0.00466733
Csa_010465236.1	PREDICTED: beta-galactosidase 1 [Camelina sativa]	0	13	5	846		0	2.98841e+07	0.00163004	1.54795e+07	0.000913745	22439617	0.00103037	3.54286e+07	0.00143213	2.33507e+07	0.00132393
Csa_010517149.1	PREDICTED: non-specific lipid-transfer protein 1 [Camelina sativa]	0	55	3	118		0	5.26338e+08	0.205831	2.81878e+08	0.119294	3.87728e+08	0.127642	4.23561e+08	0.122753	3.83415e+08	0.155855
Csa_010441673.1	PREDICTED: ras-related protein RABA1c isoform X2 [Camelina sativa]	0	42	0	216		0	1.42842e+07	0.00305161	7.84184e+06	0.00181302	2.02007e+07	0.00363298	2.48578e+07	0.00393557	24813631	0.00551024
Csa_010435830.2	PREDICTED: UDP-glucose 6-dehydrogenase 4-like isoform X1 [Camelina sativa]	0	50	0	480		0		0		0		0		0		0
Csa_010437124.2	PREDICTED: phospho-2-dehydro-3-deoxyheptonate aldolase 1, chloroplastic [Camelina sativa]	0	20	5	525		0	4.06182e+07	0.00357018	2.38909e+07	0.00227254	4.84766e+07	0.00358693	38856290	0.00253105	5.00443e+07	0.00457224
Csa_010489859.1	PREDICTED: coatomer subunit beta'-3-like [Camelina sativa]	0	25	0	608		0	3.5894e+07	0.00272425	27405945	0.00225102	31412800	0.00200703	3.90446e+07	0.00219612	2.9137e+07	0.00229867
Csa_010458966.1	PREDICTED: valine--tRNA ligase, mitochondrial 1 [Camelina sativa]	0	14	1	1112		0	3.63922e+07	0.00151019	2.66284e+07	0.00119585	1.37149e+07	0.000479113	3.33753e+07	0.0010264	2.03895e+07	0.000879498
Csa_019096367.1	PREDICTED: enhancer of mRNA-decapping protein 4-like [Camelina sativa]	0	15	0	1391		0	2.12596e+07	0.000705272	1.26547e+07	0.000454322	2.29156e+07	0.00063996	3.0773e+07	0.000756556	17292178	0.000596289
Csa_010465156.1	PREDICTED: enhancer of mRNA-decapping protein 4-like isoform X2 [Camelina sativa]	0	15	0	1303		0	2.12596e+07	0.000752904	1.26547e+07	0.000485005	2.29156e+07	0.000683181	3.0773e+07	0.000807652	17292178	0.00063656
Csa_010458082.1	PREDICTED: calreticulin-3 [Camelina sativa]	0	12	5	423		0	4.17742e+07	0.00455717	2.35226e+07	0.00277705	5.63337e+07	0.00517342	80456518	0.00650458	4.26024e+07	0.0048309
Csa_010447354.1	PREDICTED: la protein 1 [Camelina sativa]	0	13	1	433		0	2.38145e+07	0.00253794	4.67383e+06	0.000539043	1.14054e+07	0.00102323	27681058	0.00218622	16733158	0.00185363
Csa_010414081.1	PREDICTED: soluble inorganic pyrophosphatase 2 [Camelina sativa]	0	10	0	218		0	5.51034e+06	0.00116641	4.88366e+06	0.00111874	11188651	0.00199375	9.31937e+06	0.00146194	5.94628e+06	0.00130835
Csa_010489522.1	PREDICTED: soluble inorganic pyrophosphatase 2-like isoform X1 [Camelina sativa]	0	10	0	250		0	5.51034e+06	0.00101711	4.88366e+06	0.000975537	11188651	0.00173855	9.31937e+06	0.00127481	5.94628e+06	0.00114088
Csa_010413538.1	PREDICTED: vesicle-associated protein 1-1 isoform X1 [Camelina sativa]	0	14	3	240		0	1.23604e+07	0.00237656	5.96297e+06	0.00124077	1.2884e+07	0.0020854	2.04497e+07	0.0029139	1.63216e+07	0.003262
Csa_010415715.1	PREDICTED: beta carbonic anhydrase 4 isoform X1 [Camelina sativa]	0	13	2	280		0	3.73722e+07	0.00615912	1.66024e+07	0.00296108	2.92988e+07	0.00406482	1.9543e+07	0.00238688	1.96422e+07	0.00336486
Csa_010481828.1	PREDICTED: ATP sulfurylase 4, chloroplastic [Camelina sativa]	0	21	1	474		0		0		0		0		0		0
Csa_019093264.1	PREDICTED: dynamin-2B-like [Camelina sativa]	0	17	0	959		0	4.07786e+07	0.00196219	1.80979e+07	0.00094243	3.61107e+07	0.00146274	4.28734e+07	0.00152886	29484389	0.00147471
Csa_010425386.1	PREDICTED: alanine--tRNA ligase, chloroplastic/mitochondrial-like isoform X1 [Camelina sativa]	0	15	1	979		0	2.61229e+07	0.00123131	2.03469e+07	0.0010379	3.38008e+07	0.0013412	5.63909e+07	0.00196981	3.78441e+07	0.00185417
Csa_010413280.1	PREDICTED: calvin cycle protein CP12-2, chloroplastic [Camelina sativa]	0	21	2	131		0	1.1568e+08	0.0407488	1.08967e+08	0.0415398	1.05056e+08	0.031153	142678099	0.0372464	1.17678e+08	0.0430883
Csa_010497409.1	PREDICTED: psbP-like protein 1, chloroplastic, partial [Camelina sativa]	0	11	0	127		0	3.33609e+07	0.0121217	2.36863e+07	0.00931392	3.21476e+07	0.00983318	2.16788e+07	0.00583752	2.15414e+07	0.00813586
Csa_010452436.1	PREDICTED: 60S ribosomal protein L37a-1-like isoform X1 [Camelina sativa]	0	38	0	92		0	9.02943e+07	0.0452898	3.72179e+07	0.0202024	1.05029e+08	0.0443478	135737057	0.0504555	9.708e+07	0.0506146
Csa_010460986.1	PREDICTED: primary amine oxidase-like [Camelina sativa]	0	16	3	677		0	6.62061e+07	0.00451271	5.65538e+07	0.00417168	5.33107e+07	0.00305897	8.97135e+07	0.00453176	5.88209e+07	0.00416751
Csa_010472362.1	PREDICTED: uncharacterized protein LOC104752001 [Camelina sativa]	0	13	0	167		0	4.26474e+07	0.0117843	3.05685e+07	0.00914105	40866079	0.00950597	2.71785e+07	0.00556555	27182131	0.0078073
Csa_010420360.1	PREDICTED: protein TIC 40, chloroplastic isoform X1 [Camelina sativa]	0	35	5	445		0	3.95345e+07	0.00409963	2.49381e+07	0.00279861	3.19875e+07	0.00279235	5.01966e+07	0.00385755	3.09832e+07	0.00333965
Csa_010421506.1	PREDICTED: UMP-CMP kinase 3 isoform X1 [Camelina sativa]	0	27	4	211		0	3.53419e+07	0.00772922	1.05584e+07	0.00249893	4.35433e+07	0.00801657	5.38571e+07	0.00872888	34629599	0.00787225
Csa_019100885.1	PREDICTED: acetyl-CoA carboxylase 1-like [Camelina sativa]	0	20	0	2147		0	7.06084e+06	0.000151758	5.59654e+06	0.000130174	1.82934e+07	0.000330989	1.81347e+07	0.000288853	1.51637e+07	0.000338771
Csa_010500071.1	PREDICTED: acetyl-CoA carboxylase 1 isoform X1 [Camelina sativa]	0	20	0	2254		0	7.06084e+06	0.000144554	5.59654e+06	0.000123995	1.82934e+07	0.000315276	1.81347e+07	0.000275141	1.51637e+07	0.000322689
Csa_010416277.1	PREDICTED: probable phosphoribosylformylglycinamidine synthase, chloroplastic/mitochondrial [Camelina sativa]	0	14	8	1407		0	4.21047e+07	0.00138091	2.34582e+07	0.000832606	4.01771e+07	0.00110926	4.5661e+07	0.00110981	3.97198e+07	0.00135409
Csa_010459035.1	PREDICTED: fruit protein pKIWI502 [Camelina sativa]	0	10	3	295		0	4.3332e+07	0.00677821	2.46264e+07	0.00416885	4.49935e+07	0.00592486	47532772	0.00551022	4.17834e+07	0.00679384
Csa_010433849.1	PREDICTED: NAD(P)H-quinone oxidoreductase subunit S, chloroplastic-like [Camelina sativa]	0	12	5	250		0	1.23885e+07	0.0022867	1.02563e+07	0.00204874	1.06143e+07	0.0016493	8.57423e+06	0.00117288	9.98422e+06	0.00191561
Csa_010482581.1	PREDICTED: low-temperature-induced 78 kDa protein [Camelina sativa]	0	19	1	740		0	2.35352e+07	0.00146762	2.40407e+07	0.00162238	3.32962e+07	0.00174788	33797533	0.00156189	2.65443e+07	0.00172057
Csa_010436115.1	PREDICTED: 6-phosphogluconate dehydrogenase, decarboxylating 2, chloroplastic [Camelina sativa]	0	19	1	487		0	3.66856e+06	0.000347612	1.80029e+06	0.000184608	3.43526e+06	0.000274019	3.51065e+06	0.000246523	2.02956e+06	0.000199897
Csa_010495961.1	PREDICTED: defensin-like protein 1 [Camelina sativa]	0	11	1	77		0	8.22065e+06	0.00492655	380074	0.000246499	1.13454e+06	0.000572372	1.86623e+06	0.000828845	1.61721e+06	0.00100742
Csa_010456256.1	PREDICTED: DEAD-box ATP-dependent RNA helicase 8 [Camelina sativa]	0	14	4	503		0	4.82186e+07	0.00442359	1.64934e+07	0.00163749	41132465	0.00317663	3.76703e+07	0.00256111	2.97857e+07	0.00284036
Csa_010439735.1	PREDICTED: ABC transporter E family member 2 [Camelina sativa]	0	14	0	605		0	1.98194e+07	0.00151169	1.1975e+07	0.000988456	39868669	0.00255992	5.73782e+07	0.00324332	4.60509e+07	0.00365104
Csa_019086242.1	PREDICTED: ABC transporter E family member 2-like [Camelina sativa]	0	14	0	569		0	1.98194e+07	0.00160734	1.1975e+07	0.00105099	39868669	0.00272188	5.73782e+07	0.00344852	4.60509e+07	0.00388204
Csa_010446194.1	PREDICTED: 40S ribosomal protein S8-2-like [Camelina sativa]	0	67	0	148		0	3.27267e+08	0.10204	2.35597e+08	0.0794963	2.57265e+08	0.0675255	4.28946e+08	0.0991149	2.76047e+08	0.0894654
Csa_010490860.1	PREDICTED: fructose-bisphosphate aldolase 4, cytosolic [Camelina sativa]	0	49	0	359		0	249159297	0.0320266	8.98689e+07	0.0125012	194979964	0.0210982	292544702	0.0278674	2.05038e+08	0.0273952
Csa_010443497.1	PREDICTED: eukaryotic translation initiation factor [Camelina sativa]	0	20	7	782		0	5.25759e+07	0.00310247	2.5102e+07	0.00160303	50889895	0.00252799	52797499	0.0023089	56838779	0.00348636
Csa_010487679.1	PREDICTED: glutamine synthetase cytosolic isozyme 1-3 [Camelina sativa]	0	15	2	354		0	54387096	0.00708958	2.01706e+07	0.00284547	8.50893e+07	0.0093373	9.09462e+07	0.00878576	8.05692e+07	0.0109169
Csa_010426233.1	PREDICTED: aldose 1-epimerase [Camelina sativa]	0	10	5	360		0	1.58336e+07	0.00202957	9.58488e+06	0.0013296	1.87457e+07	0.00202278	2.24885e+07	0.00213627	1.45843e+07	0.0019432
Csa_010457879.1	PREDICTED: ran-binding protein 1 homolog a [Camelina sativa]	0	18	3	226		0	6.47411e+07	0.013219	2.32504e+07	0.0051376	3.09993e+07	0.00532836	3.86107e+07	0.00584248	3.28979e+07	0.00698223
Csa_010430775.1	PREDICTED: coproporphyrinogen-III oxidase 1, chloroplastic [Camelina sativa]	0	29	0	390		0	1.09067e+08	0.012905	9.17434e+07	0.0117476	1.29271e+08	0.0128762	1.48854e+08	0.0130525	9.33934e+07	0.0114864
Csa_010414114.1	PREDICTED: probable glutathione peroxidase 2 [Camelina sativa]	0	44	6	169		0	77223901	0.0210859	7.90301e+07	0.0233531	6.44695e+07	0.0148189	6.60682e+07	0.0133691	4.09821e+07	0.0116316
Csa_010442995.1	PREDICTED: protochlorophyllide reductase A, chloroplastic-like [Camelina sativa]	0	25	0	401		0		0		0		0		0		0
Csa_010480188.1	PREDICTED: peroxisomal isocitrate dehydrogenase [NADP] [Camelina sativa]	0	32	1	415		0		0		0		0		0		0
Csa_019082466.1	PREDICTED: phosphoglucan phosphatase DSP4, chloroplastic isoform X1 [Camelina sativa]	0	22	6	388		0	2.37923e+07	0.00282965	2.20155e+07	0.00283357	35835037	0.00358778	5.27274e+07	0.00464732	4.42452e+07	0.00546976
Csa_010516340.1	PREDICTED: glucan endo-1,3-beta-glucosidase, acidic isoform-like [Camelina sativa]	0	12	2	340		0	7.68999e+06	0.0010437	1.78864e+07	0.00262714	26694909	0.00305	2.4848e+07	0.00249925	1.68948e+07	0.00238346
Csa_010449710.1	PREDICTED: plasminogen activator inhibitor 1 RNA-binding protein-like isoform X2 [Camelina sativa]	0	17	0	263		0	1.44182e+07	0.00252979	9868211	0.00187379	18195142	0.00268751	27808872	0.00361598	26245374	0.00478664
Csa_010466224.1	PREDICTED: reactive Intermediate Deaminase A, chloroplastic-like [Camelina sativa]	0	40	5	189		0	8.15105e+07	0.0199012	3.33439e+07	0.00881035	8.2592e+07	0.0169756	124702065	0.0225637	51503038	0.0130709
Csa_019089780.1	PREDICTED: uncharacterized protein LOC104732699 isoform X1 [Camelina sativa]	0	15	0	832		0	1.44799e+07	0.000803103	1.16339e+07	0.000698296	1.41318e+07	0.000659819	2.06326e+07	0.000848064	9.63045e+06	0.00055521
Csa_010472217.1	PREDICTED: bifunctional aspartate aminotransferase and glutamate/aspartate-prephenate aminotransferase [Camelina sativa]	0	16	5	482		0	1.56341e+07	0.00149677	1.26388e+07	0.00130947	2.10597e+07	0.00169728	37737333	0.00267746	22800263	0.00226896
Csa_010426943.1	PREDICTED: DEAD-box ATP-dependent RNA helicase 38 [Camelina sativa]	0	19	5	495		0	3.78881e+07	0.00353204	2.65262e+07	0.00267614	5.64845e+07	0.00443276	78066812	0.00539336	6.06889e+07	0.00588082
Csa_010420056.1	PREDICTED: ribulose-1,5 bisphosphate carboxylase/oxygenase large subunit N-methyltransferase, chloroplastic [Camelina sativa]	0	8	4	517		0	2.06762e+07	0.00184548	1.48358e+07	0.00143304	1.49326e+07	0.001122	15728279	0.00104037	11525241	0.00106928
Csa_010503496.1	PREDICTED: acetolactate synthase, chloroplastic [Camelina sativa]	0	9	3	667		0	2.00585e+07	0.00138772	2.06113e+07	0.00154318	1.47113e+07	0.00085679	1.82994e+07	0.000938229	1.60671e+07	0.00115543
Csa_010441143.1	PREDICTED: methionine S-methyltransferase-like isoform X1 [Camelina sativa]	0	18	0	1088		0	2.7679e+07	0.00117395	2.71043e+07	0.00124408	3.42712e+07	0.00122363	3.95024e+07	0.00124163	2.89605e+07	0.00127676
Csa_010442452.1	PREDICTED: methionine S-methyltransferase [Camelina sativa]	0	18	0	1069		0	2.7679e+07	0.00119482	2.71043e+07	0.00126619	3.42712e+07	0.00124538	3.95024e+07	0.0012637	2.89605e+07	0.00129946
Csa_010504501.1	PREDICTED: eukaryotic translation initiation factor 3 subunit C-like isoform X1 [Camelina sativa]	0	25	5	894		0	106490090	0.00549667	20681183	0.00115525	6.97903e+07	0.00303255	101506227	0.00388287	78911078	0.00423384
Csa_010462020.1	PREDICTED: IAA-amino acid hydrolase ILR1-like 5 [Camelina sativa]	0	17	1	456		0	4.61558e+07	0.00467078	2.66412e+07	0.00291762	5.49484e+07	0.00468102	7.38201e+07	0.00553615	6.05942e+07	0.00637383
Csa_010461040.1	PREDICTED: uncharacterized protein At1g32220, chloroplastic [Camelina sativa]	0	16	3	296		0	1.71057e+07	0.00266672	1.35375e+07	0.00228395	21004681	0.0027566	1.32113e+07	0.00152635	7.6116e+06	0.00123344
Csa_010442238.1	PREDICTED: nitrile-specifier protein 5-like [Camelina sativa]	0	18	1	326		0	4.0991e+07	0.00580229	2.45094e+07	0.00375451	4.62727e+07	0.00551388	8.41262e+07	0.00882494	5.29876e+07	0.00779634
Csa_010436020.1	PREDICTED: cytochrome c1 2, heme protein, mitochondrial [Camelina sativa]	0	19	2	307		0	2.56297e+08	0.0385241	2.36347e+08	0.0384459	3.35653e+08	0.042472	300094741	0.0334286	1.80735e+08	0.0282383
Csa_010504129.1	PREDICTED: ras-related protein RABE1a [Camelina sativa]	0	47	0	269		0		0		0		0		0		0
Csa_010503220.2	PREDICTED: LOW QUALITY PROTEIN: ras-related protein RABE1c [Camelina sativa]	0	47	0	227		0		0		0		0		0		0
Csa_010435085.1	PREDICTED: 1,2-dihydroxy-3-keto-5-methylthiopentene dioxygenase 3 isoform X1 [Camelina sativa]	0	17	0	200		0	27617625	0.00637213	1.98997e+07	0.00496884	3.6322e+07	0.00705488	4.69577e+07	0.00802924	4.10138e+07	0.00983634
Csa_019085394.1	PREDICTED: phosphoglycerate kinase, cytosolic-like [Camelina sativa]	0	256	0	80		0	5.49836e+07	0.0317155	9471126	0.00591221	23855762	0.0115839	34885620	0.0149126	25747980	0.0154379
Csa_010466706.1	PREDICTED: endo-1,3;1,4-beta-D-glucanase [Camelina sativa]	0	15	4	241		0	2.24843e+07	0.00430517	30361574	0.00629138	28794481	0.00464133	44510581	0.00631603	3.83688e+07	0.00763651
Csa_010501418.1	PREDICTED: alpha-glucan water dikinase 1, chloroplastic-like [Camelina sativa]	0	19	0	504		0	2.29059e+07	0.00209722	1.86736e+07	0.00185028	5.24244e+07	0.00404066	5.53451e+07	0.00375532	4.87071e+07	0.00463549
Csa_010444283.1	PREDICTED: pyruvate kinase, cytosolic isozyme isoform X1 [Camelina sativa]	0	23	0	510		0	8.72536e+07	0.0078948	6.59424e+07	0.00645703	1.28679e+08	0.00980138	120666179	0.00809121	1.13728e+08	0.0106962
Csa_010419920.1	PREDICTED: cytochrome b-c1 complex subunit Rieske-4, mitochondrial-like [Camelina sativa]	0	11	4	275		0	7.73755e+06	0.00129837	1.81921e+06	0.00033036	1.90447e+07	0.00269023	2.73573e+07	0.00340203	1.63486e+07	0.00285156
Csa_010473160.1	PREDICTED: flagellar radial spoke protein 5-like [Camelina sativa]	0	11	2	387		0	2.60241e+07	0.00310307	1.43486e+07	0.00185155	2.62136e+07	0.00263127	3.01805e+07	0.00266694	3.48116e+07	0.00431466
Csa_019088405.1	PREDICTED: beta-D-xylosidase 1-like [Camelina sativa]	0	16	1	823		0	5547026	0.00031102	5.61433e+06	0.000340672	1.3466e+06	6.35609e-05	3.46616e+06	0.000144028	2340266	0.000136395
Csa_010427722.1	PREDICTED: phenylalanine--tRNA ligase, chloroplastic/mitochondrial [Camelina sativa]	0	34	5	431		0	4.35234e+07	0.00465986	5.94782e+07	0.00689159	4.57983e+07	0.00412783	6.31015e+07	0.0050068	3.96132e+07	0.00440856
Csa_010441684.1	PREDICTED: peptidyl-prolyl cis-trans isomerase FKBP13, chloroplastic [Camelina sativa]	0	14	3	210		0	4.67961e+07	0.010283	3.94643e+07	0.00938477	56507895	0.010453	60630432	0.00987346	69944588	0.015976
Csa_010503257.1	PREDICTED: bifunctional 3-dehydroquinate dehydratase/shikimate dehydrogenase, chloroplastic-like [Camelina sativa]	0	11	0	480		0	2.70338e+07	0.00259893	1.56789e+07	0.00163122	3.34929e+07	0.00271058	4.34095e+07	0.00309272	3.03724e+07	0.00303509
Csa_010506559.1	PREDICTED: DEAD-box ATP-dependent RNA helicase 6 [Camelina sativa]	0	11	0	520		0	7.18382e+06	0.0006375		0	3.77886e+06	0.000282297	4.41904e+06	0.000290618	4.27858e+06	0.000394667
Csa_010465154.1	PREDICTED: DNA damage-inducible protein 1 [Camelina sativa]	0	11	4	415		0	1.58425e+07	0.00176158	8.18677e+06	0.000985151	1.13997e+07	0.00106708	3.06699e+07	0.00252734	1.79671e+07	0.00207665
Csa_010467487.1	PREDICTED: homoserine kinase [Camelina sativa]	0	4	2	370		0	6988717	0.000871613		0	4489207	0.000471322	6700782	0.00061933	3.10401e+06	0.000402397
Csa_010492268.1	PREDICTED: isocitrate dehydrogenase [NADP], chloroplastic/mitochondrial [Camelina sativa]	0	24	2	493		0	4.33842e+06	0.000406081	2.08071e+06	0.000210767	4.25179e+06	0.000335023	5.748e+06	0.00039872	4.87911e+06	0.000474709
Csa_019090006.1	PREDICTED: probable cytosolic oligopeptidase A [Camelina sativa]	0	12	0	670		0	9.33284e+06	0.000642787	4.62545e+06	0.00034476	6.91981e+06	0.000401208	1.46248e+07	0.00074647	7.58294e+06	0.000542871
Csa_010414131.1	PREDICTED: probable fructokinase-1 [Camelina sativa]	0	10	2	325		0	3.36074e+07	0.00477177	1.87732e+07	0.00288465	5.6743e+07	0.00678233	7.22679e+07	0.00760431	57175285	0.00843838
Csa_010412398.1	PREDICTED: threonine--tRNA ligase, chloroplastic/mitochondrial 2-like [Camelina sativa]	0	17	5	650		0	24979486	0.00177337	1.64518e+07	0.00126397	2.90696e+07	0.0017373	3.69112e+07	0.00194197	2.99029e+07	0.00220665
Csa_010447096.1	PREDICTED: 4-hydroxy-3-methylbut-2-enyl diphosphate reductase, chloroplastic-like [Camelina sativa]	0	12	4	502		0	2.49241e+07	0.0022911	1.98052e+07	0.00197021	2.5599e+07	0.00198093	6.33625e+07	0.00431645	5.59207e+07	0.00534321
Csa_010486391.1	PREDICTED: phosphoinositide phospholipase C 2-like isoform X2 [Camelina sativa]	0	20	4	601		0	3.96143e+07	0.00304163	2.55439e+07	0.00212251	4.08631e+07	0.00264123	5.04648e+07	0.00287152	3.95808e+07	0.00315896
Csa_010454606.1	PREDICTED: succinate--CoA ligase [ADP-forming] subunit alpha-2, mitochondrial [Camelina sativa]	0	10	0	346		0	3.7462e+07	0.00499623	2.76409e+07	0.00398946	2.15784e+07	0.00242266	2.67667e+07	0.00264556	2.07496e+07	0.00287652
Csa_010479261.1	PREDICTED: protein argonaute 1 isoform X1 [Camelina sativa]	0	8	3	1074		0	7.40711e+06	0.000318253	3.28165e+06	0.00015259	1.02524e+07	0.000370828	1.21492e+07	0.000386849	8.66985e+06	0.000387205
Csa_010442710.1	PREDICTED: sorbitol dehydrogenase [Camelina sativa]	0	30	6	364		0	49425148	0.00626577	4.65685e+07	0.00638895	5.81458e+07	0.00620536	7.28583e+07	0.00684504	58052660	0.00764988
Csa_010421939.1	PREDICTED: acyl carrier protein 1, chloroplastic isoform X1 [Camelina sativa]	0	3	0	134		0	2.20327e+06	0.000758736	1224782	0.000456449	3.09185e+06	0.000896322	601584	0.000153529	4.01685e+06	0.00143785
Csa_019099968.1	PREDICTED: acyl carrier protein 1, chloroplastic isoform X2 [Camelina sativa]	0	3	0	98		0	2.20327e+06	0.00103746	1224782	0.000624124	3.09185e+06	0.00122558	601584	0.000209927	4.01685e+06	0.00196605
Csa_010496994.1	PREDICTED: protein TSS-like isoform X1 [Camelina sativa]	0	19	3	1582		0	5.67054e+07	0.00165404	17607532	0.000555815	57576503	0.0014138	59543203	0.00128713	4.49938e+07	0.00136421
Csa_010432707.1	PREDICTED: cystine lyase CORI3-like isoform X2 [Camelina sativa]	0	34	0	351		0		0		0		0		0		0
Csa_010432700.1	PREDICTED: cystine lyase CORI3-like isoform X1 [Camelina sativa]	0	34	0	367		0		0		0		0		0		0
Csa_010500304.1	PREDICTED: enhancer of mRNA-decapping protein 4-like [Camelina sativa]	0	14	0	1342		0	1.42058e+07	0.000488473	5.6227e+06	0.000209233	1.75046e+07	0.000506698	2.25568e+07	0.000574808	1.16034e+07	0.000414731
Csa_010517148.1	PREDICTED: non-specific lipid-transfer protein 1-like [Camelina sativa]	0	32	2	119		0	1.92456e+07	0.007463	5.6021e+06	0.00235094	29836129	0.0097397	3.5473e+07	0.0101941	4.02031e+07	0.0162049
Csa_010510752.1	PREDICTED: probable thionin-2.4 [Camelina sativa]	0	95	1	134		0	1.11599e+08	0.0384311	6.62429e+07	0.0246873	9.42789e+07	0.0273312	199176854	0.0508314	81458528	0.0291585
Csa_010471087.1	PREDICTED: MLP-like protein 34 [Camelina sativa]	0	32	2	320		0	6664889	0.000961105		0	8593384	0.00104319	8.31837e+06	0.000888968	5839864	0.00087536
Csa_010475063.1	PREDICTED: basic 7S globulin-like [Camelina sativa]	0	15	3	434		0	1.99743e+07	0.00212378	5.118e+06	0.00058891	2.61361e+07	0.00233938	3.27315e+07	0.00257914	1.87141e+07	0.0020683
Csa_010506315.1	PREDICTED: guanosine nucleotide diphosphate dissociation inhibitor 1 [Camelina sativa]	0	20	2	444		0	6.19282e+07	0.00643626	3.20274e+07	0.00360227	7.4906e+07	0.00655365	7.35681e+07	0.00566636	6.68631e+07	0.00722333
Csa_010418043.1	PREDICTED: ferredoxin, leaf L-A [Camelina sativa]	0	12	1	148		0	48718601	0.0151901	132304500	0.0446428	61070250	0.0160294	40109375	0.00926792	50528025	0.0163759
Csa_010415893.1	PREDICTED: NADH dehydrogenase [ubiquinone] 1 alpha subcomplex subunit 9, mitochondrial [Camelina sativa]	0	9	5	403		0	1.55539e+07	0.00178099	3.00772e+07	0.0037271	17725905	0.00170865	1.92085e+07	0.00163	1.84231e+07	0.00219276
Csa_010420024.1	PREDICTED: translocon-associated protein subunit beta [Camelina sativa]	0	10	1	195		0	2.58179e+07	0.00610961	2.19752e+07	0.00562776	21646426	0.00431223	1.48502e+07	0.00260433	1.31847e+07	0.00324318
Csa_010460695.1	PREDICTED: uncharacterized protein At2g34160 [Camelina sativa]	0	22	3	128		0	2.55339e+07	0.00920525	1.60311e+07	0.00625448	3.63062e+07	0.0110184	5.09908e+07	0.0136232	3.77616e+07	0.0141506
Csa_010444735.1	PREDICTED: succinate dehydrogenase [ubiquinone] flavoprotein subunit 1, mitochondrial isoform X1 [Camelina sativa]	0	10	3	634		0	2.43566e+07	0.00177278	1.94412e+07	0.00153134	25318755	0.00155133	3.35831e+07	0.00181146	37307674	0.00282256
Csa_010457327.1	PREDICTED: heat shock protein 90-6, mitochondrial [Camelina sativa]	0	18	0	800		0	1.35409e+08	0.00781064	5.84274e+07	0.00364724	1.11707e+08	0.00542424	1.4385e+08	0.0061492	9.10826e+07	0.00546109
Csa_010464927.1	PREDICTED: uncharacterized protein LOC104745401 isoform X1 [Camelina sativa]	0	25	3	206		0	3.71782e+07	0.00832815	3.00604e+07	0.00728729	32911482	0.00620626	64669191	0.0107356	48682316	0.0113354
Csa_010417735.1	PREDICTED: cytochrome c oxidase subunit 5b-2, mitochondrial [Camelina sativa]	0	4	1	171		0	1.4573e+07	0.00393261	10672983	0.00311694	15950752	0.00362356	6.2684e+06	0.0012536	6.58976e+06	0.00184845
Csa_010437867.1	PREDICTED: la protein 1 [Camelina sativa]	0	12	0	428		0	1.50644e+07	0.00162419	4.67383e+06	0.000545341	1.14054e+07	0.00103518	27681058	0.00221175	16733158	0.00187529
Csa_010461521.1	PREDICTED: proteasome subunit alpha type-1-B-like [Camelina sativa]	0	16	1	277		0	4.94186e+07	0.00823264	23392075	0.00421723	28671537	0.00402088	2.59922e+07	0.00320893	23283340	0.0040318
Csa_010479747.1	PREDICTED: K(+) efflux antiporter 1, chloroplastic-like [Camelina sativa]	0	13	2	1166		0	24657863	0.000975854	2.35039e+07	0.00100665	2.60068e+07	0.000866441	3.32528e+07	0.000975278	2.31198e+07	0.000951087
Csa_010472132.1	PREDICTED: V-type proton ATPase subunit a2 [Camelina sativa]	0	6	0	756		0	7516128	0.000458776	3641948	0.000240575	1.06748e+07	0.000548513	6426562	0.000290707	9703081	0.000615633
Csa_010413131.1	PREDICTED: carotenoid 9,10(9',10')-cleavage dioxygenase 1 isoform X2 [Camelina sativa]	0	15	6	538		0	4.05984e+07	0.00348221	34670394	0.00321821	46919558	0.00338783	6.24304e+07	0.00396837	4.94695e+07	0.00441051
Csa_010415006.1	PREDICTED: uncharacterized protein LOC104701072 [Camelina sativa]	0	8	4	162		0	3.16901e+07	0.00902686	1.54981e+07	0.00477752	1.63429e+07	0.00391889	1.65379e+07	0.0034911	1.70831e+07	0.00505808
Csa_010493715.1	PREDICTED: myrosinase-binding protein 2 [Camelina sativa]	0	13	1	446		0	16237972	0.00168006	450989	5.04975e-05	1.89803e+07	0.00165317	29675354	0.00227541	9.96096e+06	0.00107127
Csa_010488815.1	PREDICTED: ATPase 6, plasma membrane-type [Camelina sativa]	0	16	0	949		0		0		0		0		0		0
Csa_010443834.1	PREDICTED: thiol protease aleurain [Camelina sativa]	0	23	0	359		0	2.22924e+07	0.00286544	2.96538e+07	0.00412501	3.08177e+07	0.00333469	4.96483e+07	0.00472943	2.86279e+07	0.00382498
Csa_019086929.1	PREDICTED: thiol protease aleurain-like, partial [Camelina sativa]	0	23	0	283		0	2.22924e+07	0.00363495	2.96538e+07	0.00523278	3.08177e+07	0.00423022	4.96483e+07	0.00599952	2.86279e+07	0.00485218
Csa_010503954.1	PREDICTED: uncharacterized protein LOC104781067 [Camelina sativa]	0	29	3	149		0	1.07154e+08	0.0331855	7.27841e+07	0.0243943	7.05827e+07	0.0184019	1.15487e+08	0.026506	7.66263e+07	0.0246675
Csa_010486839.1	PREDICTED: lysine--tRNA ligase, cytoplasmic [Camelina sativa]	0	17	6	629		0	5.04237e+07	0.00369924	2.26218e+07	0.00179603	4.7326e+07	0.0029228	4.8659e+07	0.00264552	3.78377e+07	0.00288541
Csa_019101928.1	PREDICTED: probable glucan endo-1,3-beta-glucosidase BG3 [Camelina sativa]	0	42	0	267		0	44564505	0.00770204	4.73059e+07	0.00884794	64591116	0.00939748	63549565	0.00813953	3.75571e+07	0.00674706
Csa_010418516.1	PREDICTED: 26S proteasome non-ATPase regulatory subunit 8 homolog A isoform X1 [Camelina sativa]	0	11	1	267		0	1.67424e+07	0.00289357	1.2064e+07	0.00225641	1.43692e+07	0.0020906	3.39144e+07	0.00434381	29380758	0.0052782
Csa_010413126.1	PREDICTED: thylakoid lumenal 19 kDa protein, chloroplastic [Camelina sativa]	0	10	3	231		0	1.30093e+07	0.00259878	3.54667e+07	0.00766739	4.29058e+07	0.00721529	3.59492e+07	0.00532201	3.2694e+07	0.00678874
Csa_010472516.1	PREDICTED: chaperone protein ClpB4, mitochondrial [Camelina sativa]	0	31	0	975		0		0		0		0		0		0
Csa_010434871.1	PREDICTED: dihydrolipoyl dehydrogenase 2, chloroplastic [Camelina sativa]	0	18	4	564		0	8.98186e+07	0.00734878	57558184	0.00509643	95075832	0.00654849	1.43455e+08	0.0086983	1.0871e+08	0.00924539
Csa_010476843.1	PREDICTED: heme-binding protein 2-like [Camelina sativa]	0	13	1	233		0	1.09482e+07	0.00216829	6.39378e+06	0.00137038	1.2938e+07	0.00215705	1.42334e+07	0.00208906	1.54195e+07	0.00317429
Csa_010466094.1	PREDICTED: D-3-phosphoglycerate dehydrogenase 3, chloroplastic [Camelina sativa]	0	15	3	586		0	7.18988e+06	0.000566177	29417789	0.00250698	4.50531e+06	0.00029866	23111425	0.00134874	1.22532e+07	0.00100296
Csa_010493009.1	PREDICTED: cinnamoyl-CoA reductase 1-like [Camelina sativa]	0	13	1	326		0	6.51786e+06	0.000922604	3.85446e+06	0.000590451	14190435	0.00169094	1.08384e+07	0.00113696	1.03708e+07	0.00152591
Csa_010511131.1	PREDICTED: uncharacterized protein LOC104787289 [Camelina sativa]	0	26	2	291		0	4.43932e+07	0.00703965	2.3727e+07	0.00407182	4.85632e+07	0.00648283	57735152	0.00678493	4.97073e+07	0.00819334
Csa_010491715.1	PREDICTED: kinesin-like protein KIN-14A isoform X1 [Camelina sativa]	0	16	4	1273		0	3.34112e+07	0.00121113	2.29933e+07	0.000902009	3.16139e+07	0.000964717	3.58642e+07	0.000963454	2.92571e+07	0.00110239
Csa_010425851.1	PREDICTED: nicalin-1 isoform X2 [Camelina sativa]	0	8	4	570		0	8.94902e+06	0.000724484	2.52164e+06	0.000220926	5.91466e+06	0.000403093	6.63952e+06	0.000398346	4.44147e+06	0.000373754
Csa_010505940.1	PREDICTED: calcium-transporting ATPase 4, plasma membrane-type-like [Camelina sativa]	0	16	3	1030		0	3.11341e+07	0.00139485	2.79803e+07	0.0013566	4.22918e+07	0.00159503	4.24227e+07	0.00140851	4.16083e+07	0.00193766
Csa_010502390.1	PREDICTED: protein SPIRAL1-like [Camelina sativa]	0	7	1	125		0	18649706	0.00688478	7.2325e+06	0.00288946	35632120	0.0110734	32475421	0.0088847	3.5286e+07	0.0135403
Csa_010474258.1	PREDICTED: beta carbonic anhydrase 4-like [Camelina sativa]	0	9	1	277		0	10649285	0.00177406	13598749	0.00245165	11631349	0.00163117	8922559	0.00110156	8877070	0.00153718
Csa_010478312.1	PREDICTED: probable methyltransferase PMT24 isoform X1 [Camelina sativa]	0	12	1	769		0	2.56369e+07	0.0015384	1.5507e+07	0.00100702	2.41464e+07	0.00121976	2.83064e+07	0.0012588	1.63331e+07	0.00101877
Csa_010467348.1	PREDICTED: coatomer subunit gamma-like [Camelina sativa]	0	12	2	886		0	1.03088e+07	0.000536911	6.23277e+06	0.000351306	1.38311e+07	0.00060642	1.80824e+07	0.000697942	1.40497e+07	0.000760621
Csa_010442756.1	PREDICTED: low-temperature-induced 78 kDa protein-like [Camelina sativa]	0	15	1	745		0	1.09606e+06	6.789e-05	441551	2.9598e-05	1.45353e+06	7.5791e-05		0	835348	5.3783e-05
Csa_010458366.1	PREDICTED: dynamin-2A [Camelina sativa]	0	14	3	915		0	2.35996e+06	0.000119018	609343	3.32567e-05	2.48988e+06	0.000105708	4.08575e+06	0.000152703	2.03054e+06	0.000106445
Csa_019091201.1	PREDICTED: low-temperature-induced 78 kDa protein-like isoform X1 [Camelina sativa]	0	21	1	743		0	3.89452e+06	0.000241876	2.18149e+06	0.000146623	6.1772e+06	0.000322963	4.82294e+06	0.000221984	5.97208e+06	0.000385541
Csa_010451138.1	PREDICTED: probable glucan endo-1,3-beta-glucosidase A6 [Camelina sativa]	0	18	4	461		0	4.02767e+07	0.00403163	1.5646e+07	0.00169489	5.35668e+07	0.00451383	4.57885e+07	0.00339667	4.17546e+07	0.00434447
Csa_010506787.1	PREDICTED: fumarate hydratase 1, mitochondrial [Camelina sativa]	0	12	2	493		0	3.76067e+07	0.00352003	2.67539e+07	0.00271006	2.53208e+07	0.00199517	6.85306e+07	0.00475374	6.30478e+07	0.00613419
Csa_010461000.1	PREDICTED: protein LUTEIN DEFICIENT 5, chloroplastic [Camelina sativa]	0	12	6	595		0	1.87897e+07	0.00145724	4.97605e+06	0.000417644	2.36591e+07	0.00154465	2.00064e+07	0.00114988	1.98341e+07	0.00159893
Csa_019086508.1	PREDICTED: aminoacylase-1-like isoform X1 [Camelina sativa]	0	19	0	206		0	52499634	0.0117603	2.93705e+07	0.00712005	4.94874e+07	0.00933206	8.11673e+07	0.0134745	5.17079e+07	0.0120399
Csa_010444660.1	PREDICTED: subtilisin-like protease SBT1.7 [Camelina sativa]	0	15	4	759		0	1.81151e+07	0.00110136	1.35744e+07	0.000893137	3.21136e+07	0.0016436	2.51648e+07	0.00113383	2.49065e+07	0.001574
Csa_019085739.1	PREDICTED: glycine-rich RNA-binding protein 8-like, partial [Camelina sativa]	0	30	0	116		0	1.26936e+08	0.0504956	7.03155e+07	0.0302713	1.45651e+08	0.0487758	9.54157e+07	0.0281294	6.82837e+07	0.0282353
Csa_010412484.1	PREDICTED: brefeldin A-inhibited guanine nucleotide-exchange protein 5 [Camelina sativa]	0	20	1	1816		0	1.78553e+07	0.000453711	2.84548e+06	7.82488e-05	8059678	0.000172406	9.75837e+06	0.000183764	1.40318e+07	0.000370621
Csa_010461038.1	PREDICTED: glycerol-3-phosphate acyltransferase, chloroplastic [Camelina sativa]	0	20	6	460		0	2.29681e+07	0.00230407	1.03627e+07	0.001125	2.67062e+07	0.0022553	5.43743e+07	0.00404235	3.16873e+07	0.00330416
Csa_010428104.1	PREDICTED: cysteine protease inhibitor WSCP-like [Camelina sativa]	0	11	3	218		0	3.36697e+07	0.00712706		0	5.92393e+07	0.0105561	3.75168e+07	0.00588529		0
Csa_010505484.1	PREDICTED: non-specific lipid-transfer protein 1-like [Camelina sativa]	0	45	4	118		0	3.39347e+08	0.132706	1.89897e+08	0.0803665	4.35399e+08	0.143336	602253136	0.17454	5.05273e+08	0.205389
Csa_010424162.1	PREDICTED: general negative regulator of transcription subunit 3-like [Camelina sativa]	0	9	0	774		0	1.16576e+07	0.000695019	1.42959e+06	9.22381e-05	8.71989e+06	0.000437643	2.21321e+07	0.000977867	1.86484e+07	0.00115567
Csa_010495274.1	PREDICTED: general negative regulator of transcription subunit 3-like [Camelina sativa]	0	9	0	835		0	1.16576e+07	0.000644245	1.42959e+06	8.54997e-05	8.71989e+06	0.000405672	2.21321e+07	0.00090643	1.86484e+07	0.00107125
Csa_010422073.1	PREDICTED: protein SGT1 homolog B [Camelina sativa]	0	12	4	358		0	18059419	0.00232782	1.99818e+07	0.00278734	2.29452e+07	0.00248977	2.728e+07	0.00260591	1.87742e+07	0.00251543
Csa_010510826.2	PREDICTED: LOW QUALITY PROTEIN: proteasome subunit alpha type-3 [Camelina sativa]	0	19	6	322		0	8.50963e+07	0.012195	1.17494e+07	0.00182221	4.29303e+07	0.00517914	6.61586e+07	0.00702633	4.17616e+07	0.00622093
Csa_019086797.1	PREDICTED: FAM10 family protein At4g22670 [Camelina sativa]	0	15	1	457		0	4.76996e+07	0.00481644	2.11401e+07	0.00231009	2.99106e+07	0.00254249	7.31315e+07	0.00547251	4.09656e+07	0.00429969
Csa_010420330.1	PREDICTED: biotin carboxyl carrier protein of acetyl-CoA carboxylase 1, chloroplastic-like isoform X1 [Camelina sativa]	0	21	3	281		0	7.55323e+07	0.0124038	5.48299e+07	0.00974427	1.01551e+08	0.0140388	152128381	0.0185141	9.14617e+07	0.0156123
Csa_010430487.1	PREDICTED: puromycin-sensitive aminopeptidase-like [Camelina sativa]	0	7	1	583		0	1.7304e+06	0.000136964		0		0		0		0
Csa_010422271.1	PREDICTED: probable aminotransferase TAT4 [Camelina sativa]	0	36	1	424		0	17411889	0.001895		0	1.63618e+07	0.00149905	1.63354e+07	0.00131754	12258146	0.00138673
Csa_010445250.1	PREDICTED: plasma membrane-associated cation-binding protein 1 [Camelina sativa]	0	21	0	303		0	5.59119e+07	0.0085151	9.86308e+07	0.0162558	1.17401e+08	0.0150515	1.31614e+08	0.0148545	1.12741e+08	0.0178473
Csa_010414272.1	PREDICTED: ferrochelatase-2, chloroplastic [Camelina sativa]	0	7	4	511		0	9.39443e+06	0.000848355	5.5101e+06	0.000538489	14743900	0.00112083	2.31677e+07	0.00155046	1.79132e+07	0.00168146
Csa_019101636.1	PREDICTED: ras GTPase-activating protein-binding protein 1-like [Camelina sativa]	0	13	2	476		0	5.26635e+06	0.000510541	1.66141e+06	0.000174305	4.76582e+06	0.000388938	5.67339e+06	0.000407599	4.94535e+06	0.000498337
Csa_010434821.1	PREDICTED: NADH-ubiquinone oxidoreductase 20.9 kDa subunit-like [Camelina sativa]	0	4	2	106		0	1.90586e+07	0.00829683	25134835	0.0118416	2.27042e+07	0.00832053	24081456	0.00776918	1.37269e+07	0.00621158
Csa_010460049.1	PREDICTED: cytochrome c-like [Camelina sativa]	0	23	1	112		0	10706367	0.00441115	826209	0.000368392		0	1.28169e+06	0.000391349	722122	0.000309262
Csa_019087908.1	PREDICTED: probable aminotransferase TAT4 [Camelina sativa]	0	60	0	84		0	2.62998e+07	0.0144478	7.96402e+06	0.00473469	2.47267e+07	0.011435	4.31312e+07	0.0175594	1.10071e+07	0.00628534
Csa_010414209.1	PREDICTED: glutathione S-transferase F9 [Camelina sativa]	0	8	5	215		0	1.76487e+07	0.00378794	5.18934e+06	0.00120535	2.40816e+07	0.00435107	3.88504e+07	0.00617953	1.36811e+07	0.00305222
Csa_010459999.1	PREDICTED: cytochrome c oxidase subunit 6b-1 [Camelina sativa]	0	9	1	191		0	8.0042e+06	0.0019338	1.49598e+06	0.000391139	1.91219e+06	0.000388909	2.97744e+06	0.000533099	1.54109e+06	0.000387015
Csa_010416046.2	PREDICTED: monothiol glutaredoxin-S12, chloroplastic [Camelina sativa]	0	16	1	191		0	1.77578e+07	0.00429026	11895951	0.00311031	2.29974e+07	0.0046773	3.47671e+07	0.0062249	2.23394e+07	0.00561012
Csa_010468615.1	PREDICTED: D-3-phosphoglycerate dehydrogenase 1, chloroplastic-like, partial [Camelina sativa]	0	9	1	229		0		0		0	6.55019e+06	0.00111114	6.98212e+06	0.00104268	6.01133e+06	0.00125913
Csa_010436970.1	PREDICTED: cold shock protein 2 [Camelina sativa]	0	8	0	200		0	3.24342e+07	0.00748344	373480	9.32559e-05	3.56255e+07	0.00691959	20512356	0.00350739	1.89546e+07	0.00454589
Csa_010446385.1	PREDICTED: cold shock protein 2 [Camelina sativa]	0	8	0	189		0	3.24342e+07	0.00791899	373480	9.86834e-05	3.56255e+07	0.00732232	20512356	0.00371152	1.89546e+07	0.00481047
Csa_010442587.1	PREDICTED: chaperone protein ClpD, chloroplastic [Camelina sativa]	0	51	1	949		0		0		0		0		0		0
Csa_010482993.1	PREDICTED: putative lipid-transfer protein DIR1 [Camelina sativa]	0	11	2	108		0	1.54816e+07	0.00661483	1.47509e+07	0.00682075	26907255	0.00967822	3.20764e+07	0.0101569	2.5515e+07	0.011332
Csa_010428285.1	PREDICTED: phosphoethanolamine N-methyltransferase 3 isoform X1 [Camelina sativa]	0	8	2	504		0	16798657	0.00153806	4.11203e+06	0.00040744	9.0266e+06	0.000695734	1.33496e+07	0.000905806	1.48662e+07	0.00141482
Csa_010427009.1	PREDICTED: diaminopimelate epimerase, chloroplastic [Camelina sativa]	0	21	5	364		0	1.60183e+07	0.00203069	1.53348e+07	0.00210385	1.32129e+07	0.00141009	1.54055e+07	0.00144735	1.26869e+07	0.00167181
Csa_010434505.1	PREDICTED: uncharacterized protein At4g15545 [Camelina sativa]	0	10	4	344		0	1.34802e+07	0.00180828	1.33845e+07	0.00194303	1.8723e+07	0.0021143	1.59944e+07	0.00159004	15631117	0.00217954
Csa_010509618.1	PREDICTED: RNA-binding protein CP31B, chloroplastic-like [Camelina sativa]	0	17	1	321		0	78412058	0.0112721	62990822	0.00979965	73749436	0.0089249	96497451	0.0102804	69825564	0.0104338
Csa_010454830.1	PREDICTED: UDP-glucuronic acid decarboxylase 3 [Camelina sativa]	0	12	3	342		0	1.13211e+07	0.00152753	7.97272e+06	0.00116418	26742344	0.00303755	4.7112e+07	0.0047109	2.86159e+07	0.00401342
Csa_010433683.1	PREDICTED: peptide methionine sulfoxide reductase A4, chloroplastic-like [Camelina sativa]	0	8	3	258		0	2.79417e+07	0.00499759	1.68599e+07	0.00326343	3.81146e+07	0.00573881	4.9501e+07	0.00656133	2.71906e+07	0.00505514
Csa_019082898.1	PREDICTED: fasciclin-like arabinogalactan protein 10 [Camelina sativa]	0	6	0	424		0	3.07758e+07	0.00334944		0	17345603	0.00158918	1.29416e+07	0.00104381	2.50244e+07	0.00283095
Csa_010500508.1	PREDICTED: presequence protease 2, chloroplastic/mitochondrial [Camelina sativa]	0	21	0	1071		0	62839565	0.00270752	48726828	0.00227205	6.20623e+07	0.00225107	93082901	0.0029722	6.30905e+07	0.00282558
Csa_010460563.1	PREDICTED: non-specific lipid transfer protein GPI-anchored 1-like [Camelina sativa]	0	49	1	198		0	2.47159e+07	0.00576023	41043335	0.0103518	6.64847e+07	0.0130439	5.02803e+07	0.00868422	3.11724e+07	0.00755159
Csa_010496671.2	PREDICTED: enoyl-[acyl-carrier-protein] reductase [NADH], chloroplastic-like [Camelina sativa]	0	22	0	234		0	120803846	0.0238228	45982596	0.00981332	5.78807e+07	0.00960877	8.26517e+07	0.0120791	6.52686e+07	0.013379
Csa_010461768.1	PREDICTED: ras-related protein RABG3e [Camelina sativa]	0	19	3	207		0	2.97279e+07	0.00662707	2.38774e+07	0.00576043	3.75699e+07	0.0070505	5.67171e+07	0.00937005	3.30867e+07	0.00766685
Csa_010434710.1	PREDICTED: probable phospholipid hydroperoxide glutathione peroxidase 6, mitochondrial [Camelina sativa]	0	41	2	233		0	4.37553e+07	0.00866568	1.81808e+07	0.00389669	5.77925e+07	0.0096353	5.10133e+07	0.0074873	3.43076e+07	0.00706265
Csa_010454672.1	PREDICTED: uncharacterized protein LOC104736400 isoform X1 [Camelina sativa]	0	13	0	933		0	1.87711e+07	0.000928401	1.55764e+07	0.000833725	2.31819e+07	0.0009652	2.75183e+07	0.00100865	2.39879e+07	0.00123323
Csa_010421195.1	PREDICTED: uncharacterized protein LOC104706684 isoform X1 [Camelina sativa]	0	13	0	919		0	1.87711e+07	0.000942544	1.55764e+07	0.000846426	2.31819e+07	0.000979904	2.75183e+07	0.00102401	2.39879e+07	0.00125202
Csa_010506629.1	PREDICTED: eukaryotic translation initiation factor 3 subunit I-like isoform X1 [Camelina sativa]	0	14	0	361		0	3.42765e+07	0.00438144	1.42987e+07	0.00197801	3.07874e+07	0.00331296	46285820	0.00438469	33000181	0.00438473
Csa_010495920.1	PREDICTED: monothiol glutaredoxin-S12, chloroplastic [Camelina sativa]	0	18	0	178		0	28061602	0.00727479	20808432	0.00583791	25618956	0.00559102	45550752	0.00875132	26665076	0.0071855
Csa_019083389.1	PREDICTED: defensin-like protein 1 [Camelina sativa]	0	159	0	81		0		0		0		0		0		0
Csa_010460737.1	PREDICTED: GDSL esterase/lipase At1g29660 [Camelina sativa]	0	5	3	364		0	17639597	0.00223622	428390	5.87728e-05	1.26501e+07	0.00135002		0	6.79238e+06	0.000895065
Csa_010429614.1	PREDICTED: far upstream element-binding protein 2-like [Camelina sativa]	0	18	3	636		0	2.1208e+07	0.00153876	1.10409e+07	0.000866932	1.97993e+07	0.00120932	32298589	0.0017367	2.38814e+07	0.0018011
Csa_010448390.1	PREDICTED: protein transport protein Sec24-like At3g07100 [Camelina sativa]	0	17	1	1049		0	1.67663e+07	0.000737546	3507990	0.000167002	1.09916e+07	0.00040704	21174217	0.000690287	1.12828e+07	0.000515913
Csa_010473163.1	PREDICTED: flagellar radial spoke protein 5-like [Camelina sativa]	0	6	0	386		0		0		0		0		0		0
Csa_010448188.1	PREDICTED: aconitate hydratase 3, mitochondrial [Camelina sativa]	0	11	1	998		0	3.79582e+06	0.000175511	3.94727e+06	0.000197517	6.79937e+06	0.00026466	4.68303e+06	0.00016047	4.81081e+06	0.000231218
Csa_010458784.1	PREDICTED: LOW QUALITY PROTEIN: serine/threonine-protein phosphatase 2A 65 kDa regulatory subunit A gamma isoform [Camelina sativa]	0	20	2	587		0	2.41449e+06	0.000189808		0	615402	4.07259e-05	495804	2.88849e-05	507058	4.14337e-05
Csa_010473093.1	PREDICTED: protein argonaute 4 [Camelina sativa]	0	12	3	923		0	7.93698e+07	0.00396809	6.13202e+07	0.00331772	1.0747e+08	0.00452309	119738659	0.0044364	8.60386e+07	0.00447122
Csa_010446585.1	PREDICTED: chaperone protein dnaJ A6, chloroplastic [Camelina sativa]	0	12	1	448		0		0	5626433	0.000627182	3.07906e+06	0.000266987	936202	7.14644e-05	1.9978e+06	0.000213899
Csa_019093982.1	PREDICTED: ATPase 9, plasma membrane-type isoform X4 [Camelina sativa]	0	26	0	960		0	1.9685e+07	0.000946222	1.9735e+07	0.00102661	7.67374e+07	0.00310517	1.11633e+08	0.00397667	7.54647e+07	0.00377057
Csa_010448862.1	PREDICTED: FAM10 family protein At4g22670-like [Camelina sativa]	0	14	0	427		0	3.73792e+07	0.00403953	2.04495e+07	0.00239163	2.99106e+07	0.00272112	7.08861e+07	0.00567716	3.92193e+07	0.00440561
Csa_010418474.1	PREDICTED: V-type proton ATPase subunit E3 [Camelina sativa]	0	13	1	237		0		0		0		0		0		0
Csa_010458259.1	PREDICTED: ras-related protein RABA2a-like [Camelina sativa]	0	38	0	217		0		0	1.01477e+06	0.000233531	2.37357e+06	0.000424904	2135275	0.000336506	1999725	0.000442023
Csa_010490204.1	PREDICTED: ras-related protein RABA2a isoform X1 [Camelina sativa]	0	38	0	244		0		0	1.01477e+06	0.00020769	2.37357e+06	0.000377886	2135275	0.000299269	1999725	0.00039311
Csa_010446870.1	PREDICTED: ras-related protein RABB1b-like [Camelina sativa]	0	8	0	211		0	2.29033e+07	0.00500891	6.78634e+06	0.00160617	2.84506e+07	0.00523792	5.0923e+07	0.00825334	3.05903e+07	0.00695401
Csa_010449662.1	PREDICTED: ras-related protein RABB1c-like [Camelina sativa]	0	19	0	170		0	5.0075e+07	0.0135925	2.47025e+07	0.00725655	60885498	0.0139128	8.20314e+07	0.0165017	6.3191e+07	0.0178296
Csa_010451424.1	PREDICTED: ras-related protein RABB1c-like [Camelina sativa]	0	19	0	151		0	5.0075e+07	0.0153028	2.47025e+07	0.00816963	60885498	0.0156634	8.20314e+07	0.0185781	6.3191e+07	0.020073
Csa_010421886.1	PREDICTED: 40S ribosomal protein S18 [Camelina sativa]	0	17	4	152		0	101409129	0.0307866	1.52632e+07	0.00501465	3.85681e+07	0.00985677	6.01041e+07	0.0135225	3.44222e+07	0.0108625
Csa_010460876.1	PREDICTED: patellin-4-like [Camelina sativa]	0	17	1	532		0	260128	2.25634e-05		0		0	742422	4.77241e-05		0
Csa_010458429.1	PREDICTED: ATP-citrate synthase alpha chain protein 1 [Camelina sativa]	0	19	1	423		0	1.24295e+06	0.000135594	7.41919e+06	0.0008759	9612397	0.000882757	14579702	0.00117871	8.08731e+06	0.000917059
Csa_010480316.1	PREDICTED: S-adenosylmethionine synthase 1-like [Camelina sativa]	0	12	0	162		0	5.49665e+06	0.00156571		0	98125.7	2.35298e-05		0	12985.3	3.84477e-06
Csa_010467817.1	PREDICTED: 60S ribosomal protein L14-1 isoform X1 [Camelina sativa]	0	31	0	134		0	2.22957e+08	0.0767795	123325204	0.0459606	254368385	0.0737409	3.22921e+08	0.0824119	2.76335e+08	0.0989157
Csa_010435019.1	PREDICTED: cytochrome P450 97B3, chloroplastic-like [Camelina sativa]	0	7	4	579		0	748268	5.96357e-05	573255	4.94433e-05	1.50788e+07	0.00101167	1.57918e+07	0.000932721	1.439e+07	0.00119211
Csa_010461048.1	PREDICTED: diaminopimelate decarboxylase 2, chloroplastic-like [Camelina sativa]	0	12	1	485		0	1.255e+07	0.00119407	5.15687e+06	0.000530986	1.89784e+07	0.00152009	3.67867e+07	0.00259387	25488236	0.00252076
Csa_010451220.1	PREDICTED: 60S ribosomal protein L11-1-like [Camelina sativa]	0	11	0	185		0	27597385	0.00688374	792277	0.000213867	55629741	0.0116811	7.99761e+07	0.0147838	51900979	0.0134567
Csa_010512842.1	PREDICTED: 60S ribosomal protein L11-1-like [Camelina sativa]	0	11	0	220		0	27597385	0.0057886	792277	0.000179843	55629741	0.00982278	7.99761e+07	0.0124318	51900979	0.0113158
Csa_019091108.1	PREDICTED: acetyl-CoA carboxylase 1-like [Camelina sativa]	0	14	0	1699		0	5.09126e+06	0.00013828	3.90285e+06	0.000114717	1.39003e+07	0.00031782	1.19616e+07	0.000240766	1.08514e+07	0.000306356
Csa_010501645.2	PREDICTED: probable methyltransferase PMT24 [Camelina sativa]	0	11	0	850		0	1.78031e+07	0.000966505	1.03629e+07	0.000608834	1.19368e+07	0.00054553	1.9126e+07	0.000769491	1.63331e+07	0.00092169
Csa_010423703.1	PREDICTED: ras-related protein RABE1d isoform X2 [Camelina sativa]	0	26	1	206		0	6.05198e+07	0.0135568	3.00623e+07	0.00728775	3.10555e+07	0.00585627	4.30801e+07	0.00715167	3.98398e+07	0.00927649
Csa_010432683.1	PREDICTED: probable aminotransferase TAT4 [Camelina sativa]	0	31	0	424		0	1857525	0.000202161	618594	7.28582e-05	2.4299e+06	0.000222624	4629991	0.000373433		0
Csa_010459168.1	PREDICTED: glyceraldehyde-3-phosphate dehydrogenase GAPCP2, chloroplastic isoform X1 [Camelina sativa]	0	34	0	426		0	7.68252e+06	0.000832189		0	10039633	0.0009155	9950129	0.000798762	7.53639e+06	0.00084857
Csa_010472812.1	PREDICTED: glyceraldehyde-3-phosphate dehydrogenase GAPCP1, chloroplastic [Camelina sativa]	0	34	0	424		0	7.68252e+06	0.000836114		0	10039633	0.000919818	9950129	0.000802529	7.53639e+06	0.000852573
Csa_010500077.1	PREDICTED: uncharacterized protein LOC104777502 [Camelina sativa]	0	23	0	300		0	4.22818e+07	0.0065037	2.22901e+07	0.00371046	4.60535e+07	0.00596337	5.37945e+07	0.00613217	4.60424e+07	0.00736157
Csa_019102086.1	PREDICTED: 60S ribosomal protein L15-1-like [Camelina sativa]	0	33	0	160		0	1.03171e+08	0.0297554	7.16167e+07	0.0223528	96602346	0.023454	1.89451e+08	0.0404925	8.78352e+07	0.0263319
Csa_010442206.1	PREDICTED: adenylate kinase 2, chloroplastic [Camelina sativa]	0	20	5	287		0	53142699	0.00854456	2.55091e+07	0.00443867	3.99e+07	0.00540058	59334247	0.00707004	5.78991e+07	0.00967662
Csa_010494044.1	PREDICTED: probable nucleolar protein 5-1 [Camelina sativa]	0	9	3	531		0	1.1512e+07	0.00100043	2132205	0.000200527	12934480	0.000946247	4.26115e+06	0.000274429	1.83041e+06	0.000165344
Csa_010482634.1	PREDICTED: 40S ribosomal protein S10-3 [Camelina sativa]	0	14	2	184		0	1.3085e+07	0.0032816	675427	0.000183315	11326004	0.00239116	11876794	0.00220739	9647767	0.00251503
Csa_010484241.1	PREDICTED: beta-D-xylosidase 4 [Camelina sativa]	0	14	4	785		0	1.81497e+07	0.00106691	1.22686e+07	0.000780486	1.83017e+07	0.000905671	3.35006e+07	0.00145942	2.12429e+07	0.00129801
Csa_010431379.1	PREDICTED: nucleoside diphosphate kinase 1-like [Camelina sativa]	0	37	0	136		0	1.14602e+08	0.0388851	67661426	0.0248451	248465896	0.0709705	2.0248e+08	0.0509146	221965840	0.0782855
Csa_010467108.1	PREDICTED: subtilisin-like protease SBT1.8 isoform X3 [Camelina sativa]	0	13	3	756		0	1.87478e+07	0.00114435	4.94889e+06	0.000326907	1.96807e+07	0.00101127	1.89984e+07	0.000859398	1.71541e+07	0.00108838
Csa_010460197.1	PREDICTED: pyruvate dehydrogenase E1 component subunit alpha-2, mitochondrial [Camelina sativa]	0	15	2	393		0	3.20966e+06	0.000376872	2.58844e+06	0.000328915	5686818	0.000562117	6.79773e+06	0.00059152	7.60451e+06	0.000928138
Csa_010491681.1	PREDICTED: asparagine synthetase [glutamine-hydrolyzing] 3-like isoform X1 [Camelina sativa]	0	14	0	580		0	1.53425e+07	0.00122067	1.85537e+06	0.00015975	17687031	0.00118461	1.93419e+07	0.00114043	2.61957e+07	0.00216639
Csa_019097199.1	PREDICTED: asparagine synthetase [glutamine-hydrolyzing] 3-like isoform X2 [Camelina sativa]	0	14	0	551		0	1.53425e+07	0.00128491	1.85537e+06	0.000168158	17687031	0.00124696	1.93419e+07	0.00120045	2.61957e+07	0.00228041
Csa_010413060.1	PREDICTED: 40S ribosomal protein S16-1-like isoform X2 [Camelina sativa]	0	42	2	146		0	30235696	0.00955642	8.30917e+06	0.00284212	286123	7.6129e-05		0		0
Csa_010505936.1	PREDICTED: S-formylglutathione hydrolase-like [Camelina sativa]	0	12	3	280		0	18195258	0.00299867	7.09032e+06	0.00126458	2.12478e+07	0.00294786	3.54355e+07	0.00432792	2.11011e+07	0.00361477
Csa_010457620.1	PREDICTED: ubiquitin-like modifier-activating enzyme 5 isoform X1 [Camelina sativa]	0	13	4	432		0	1.76135e+07	0.00188144	8.27864e+06	0.000957004	2.33142e+07	0.00209646	28157497	0.00222899	1.8514e+07	0.00205566
Csa_010430471.1	PREDICTED: uncharacterized protein LOC109124642 [Camelina sativa]	0	10	5	534		0	1.6801e+07	0.00145185	1144966	0.000107075	6.25461e+06	0.000454997	2.21133e+07	0.00141615	1.72509e+07	0.00154955
Csa_010421968.1	PREDICTED: subtilisin-like protease SBT3.9 isoform X1 [Camelina sativa]	0	10	0	759		0	1.46376e+07	0.000889931	1.24354e+07	0.000818194	23769458	0.00121654	27819082	0.00125343	1.57119e+07	0.000992936
Csa_019084056.1	PREDICTED: subtilisin-like protease SBT3.9 isoform X2 [Camelina sativa]	0	10	0	712		0	1.46376e+07	0.000948676	1.24354e+07	0.000872204	23769458	0.00129685	27819082	0.00133617	1.57119e+07	0.00105848
Csa_010424990.1	PREDICTED: transmembrane 9 superfamily member 3 [Camelina sativa]	0	12	3	592		0	3.65157e+07	0.00284634	2.16311e+07	0.00182471	4.29569e+07	0.00281878	4.75486e+07	0.00274672	4.41867e+07	0.00358017
Csa_010422126.1	PREDICTED: probable thionin-2.4 [Camelina sativa]	0	8	2	134		0	3.69456e+07	0.0127229	6.58952e+06	0.00245577	6.2493e+07	0.0181166	9.70126e+07	0.0247583	67797822	0.0242686
Csa_010504356.1	PREDICTED: probable mitochondrial-processing peptidase subunit alpha-2, chloroplastic/mitochondrial isoform X1 [Camelina sativa]	0	20	0	502		0	73938897	0.00679669	104245684	0.0103703	5.25169e+07	0.00406392	57930982	0.00394644	62745640	0.00599534
Csa_019083407.1	PREDICTED: eukaryotic translation initiation factor 5B-like [Camelina sativa]	0	7	1	1239		0	8.82575e+06	0.000328706	2.0246e+06	8.16031e-05	3.24265e+06	0.000101667	2.36279e+07	0.000652158	12424353	0.00048099
Csa_010427780.1	PREDICTED: V-type proton ATPase subunit D-like [Camelina sativa]	0	20	6	261		0	5.03591e+07	0.0089036	3.28646e+07	0.0062882	7.63939e+07	0.0113702	1.03828e+08	0.0136042	8.11086e+07	0.014906
Csa_010422963.1	PREDICTED: eukaryotic initiation factor 4A-6-like [Camelina sativa]	0	17	0	222		0	8.94289e+06	0.00185889	215647	4.85097e-05	9.18695e+06	0.00160756	1.29249e+07	0.00199101	1.23344e+07	0.00266501
Csa_010433843.1	PREDICTED: nucleoside diphosphate kinase IV, chloroplastic/mitochondrial isoform X2 [Camelina sativa]	0	17	0	220		0	5.48445e+07	0.0115037	8.2371e+06	0.00186978	2.34975e+07	0.00414905	3.5623e+07	0.0055374	2.49477e+07	0.00543929
Csa_010463230.1	PREDICTED: ras-related protein RABA4a-like [Camelina sativa]	0	13	1	228		0	7.59444e+06	0.00153705	3.06643e+06	0.00067164	1.11157e+07	0.00189388	1.98651e+07	0.00297958	1.37194e+07	0.00288624
Csa_010516000.1	PREDICTED: tryptophan synthase alpha chain, chloroplastic [Camelina sativa]	0	8	1	316		0	1.37012e+07	0.00200078	12795041	0.00202206	1.39479e+07	0.00171464	1.39783e+07	0.00151275	10399391	0.00157854
Csa_010479333.1	PREDICTED: ras-related protein RABD2a [Camelina sativa]	0	43	1	203		0	4454364	0.00101255	2164428	0.000532458	11463425	0.00219365	9785695	0.00164852	9729918	0.00229904
Csa_010438889.1	PREDICTED: ATP-dependent Clp protease ATP-binding subunit CLPT1, chloroplastic [Camelina sativa]	0	19	1	245		0	3.88366e+07	0.00731482	2.90261e+07	0.00591644	4.2732e+07	0.00677544	5.96827e+07	0.00833068	43131330	0.00844424
Csa_010451961.1	PREDICTED: putative glucose-6-phosphate 1-epimerase [Camelina sativa]	0	10	4	313		0	1.30789e+07	0.00192821	1.35752e+07	0.00216592	1.71071e+07	0.00212315	2.05817e+07	0.00224872	2.0517e+07	0.00314416
Csa_010488658.1	PREDICTED: uncharacterized protein LOC104766465 [Camelina sativa]	0	9	2	201		0	7.81516e+06	0.0017942	1.71092e+07	0.00425082	1.40169e+07	0.00270898	8.20395e+06	0.00139581	8490789	0.00202622
Csa_010465499.1	PREDICTED: thioredoxin M4, chloroplastic [Camelina sativa]	0	38	5	194		0	7.66048e+07	0.0182214	5.34335e+07	0.0137547	1.16004e+08	0.0232285	1.11968e+08	0.0197374	8.09493e+07	0.0200145
Csa_010480797.1	PREDICTED: bifunctional aspartokinase/homoserine dehydrogenase 1, chloroplastic [Camelina sativa]	0	13	1	874		0	1.2907e+07	0.000681464	8.12758e+06	0.000464396	1.81997e+07	0.000808913	2.50247e+07	0.000979163	1.52323e+07	0.000835962
Csa_010464649.1	PREDICTED: ras-related protein RABE1e isoform X1 [Camelina sativa]	0	45	0	218		0		0		0		0		0		0
Csa_010485145.1	PREDICTED: fasciclin-like arabinogalactan protein 1 [Camelina sativa]	0	10	1	386		0	5.47884e+06	0.000654983	2.35489e+06	0.000304664	14567999	0.0014661	16946246	0.00150136	10192217	0.00126653
Csa_010440938.1	PREDICTED: probable thionin-2.4 [Camelina sativa]	0	54	1	133		0	1.26241e+07	0.00438002	1.59512e+06	0.000598935	6.31539e+06	0.00184458	8.04681e+06	0.00206905	4.33738e+06	0.00156426
Csa_010435989.1	PREDICTED: proteasome subunit beta type-7-B [Camelina sativa]	0	10	3	274		0	3.68932e+07	0.00621332	1.14273e+07	0.00208273	6.55843e+07	0.00929821	7.76636e+07	0.00969316	6.50641e+07	0.01139
Csa_010438646.1	PREDICTED: probable histone H2A.3 [Camelina sativa]	0	51	0	131		0	5696735	0.0020067	1.69433e+06	0.000645901	1256214	0.000372514	2.25452e+06	0.000588547	2.16478e+06	0.000792642
Csa_010461941.1	PREDICTED: probable histone H2A.1 [Camelina sativa]	0	51	0	133		0	5696735	0.00197653	1.69433e+06	0.000636189	1256214	0.000366912	2.25452e+06	0.000579697	2.16478e+06	0.000780723
Csa_010466270.1	PREDICTED: probable histone H2A.2 [Camelina sativa]	0	51	0	132		0	5696735	0.0019915	1.69433e+06	0.000641008	1256214	0.000369692	2.25452e+06	0.000584089	2.16478e+06	0.000786637
Csa_010491778.1	PREDICTED: argininosuccinate lyase, chloroplastic [Camelina sativa]	0	12	6	519		0	2.5291e+07	0.00224868	8.06931e+06	0.000776439	31236450	0.002338	4.9814e+07	0.00328233	3.09155e+07	0.00285722
Csa_010428488.1	PREDICTED: betaine aldehyde dehydrogenase 1, chloroplastic [Camelina sativa]	0	7	2	502		0	1.18497e+07	0.00108926	9781969	0.000973108	1.46918e+07	0.0011369	1.13022e+07	0.00076994	1.11389e+07	0.00106432
Csa_010477504.1	PREDICTED: cytochrome c oxidase subunit 6b-1 [Camelina sativa]	0	8	0	191		0	3.77834e+06	0.000912842	844451	0.00022079	1.72725e+06	0.000351295	2.54575e+06	0.000455806	1.54109e+06	0.000387015
Csa_010477771.1	PREDICTED: uncharacterized protein LOC104756820 [Camelina sativa]	0	12	3	421		0	2.43438e+07	0.0026683	3.08751e+06	0.000366239	1.26809e+07	0.00117009	3.56336e+07	0.00289452	2.80617e+07	0.00319717
Csa_010415785.1	PREDICTED: MLP-like protein 43 [Camelina sativa]	0	4	0	159		0	2.01469e+06	0.000584709		0	4.00043e+06	0.000977372	1789992	0.000384992	2.518e+06	0.000759612
Csa_010427896.1	PREDICTED: MLP-like protein 43 [Camelina sativa]	0	4	0	158		0	2.01469e+06	0.00058841		0	4.00043e+06	0.000983558	1789992	0.000387429	2.518e+06	0.00076442
Csa_010417036.1	PREDICTED: probable malate dehydrogenase, glyoxysomal isoform X2 [Camelina sativa]	0	33	1	356		0	1.76879e+06	0.000229274		0		0	908412	8.72632e-05	583311	7.8593e-05
Csa_010462123.1	PREDICTED: serine-threonine kinase receptor-associated protein [Camelina sativa]	0	13	1	343		0	2.4498e+07	0.00329582	781425	0.000113771	5.87455e+06	0.000665319	9.04668e+06	0.000901972	6.73183e+06	0.000941397
Csa_010443918.1	PREDICTED: uncharacterized protein LOC104726691 [Camelina sativa]	0	6	0	488		0	3.60141e+06	0.00034055	724763	7.41677e-05	5.23179e+06	0.000416467	9.25788e+06	0.000648769	7.66706e+06	0.000753604
Csa_010502195.1	PREDICTED: probable leucine-rich repeat receptor-like serine/threonine-protein kinase At3g14840 [Camelina sativa]	0	16	0	1018		0	1.5547e+07	0.000704739	1.62681e+07	0.000798046	1.95782e+07	0.000747094	2.04873e+07	0.000688234	1.3545e+07	0.000638214
Csa_010465400.1	PREDICTED: probable leucine-rich repeat receptor-like serine/threonine-protein kinase At3g14840 [Camelina sativa]	0	16	0	1022		0	1.5547e+07	0.000701981	1.62681e+07	0.000794923	1.95782e+07	0.00074417	2.04873e+07	0.00068554	1.3545e+07	0.000635716
Csa_010512127.1	PREDICTED: 3-isopropylmalate dehydratase small subunit 3-like [Camelina sativa]	0	14	0	258		0	6.35274e+07	0.0113624	1.96891e+07	0.00381104	4.12354e+07	0.0062087	5.65417e+07	0.00749457	4.48802e+07	0.0083439
Csa_010480676.1	PREDICTED: 28 kDa ribonucleoprotein, chloroplastic-like [Camelina sativa]	0	14	0	290		0	1.58495e+07	0.002522	1.27097e+07	0.00218865	1.9871e+07	0.00266177	3.22647e+07	0.00380477	2.04282e+07	0.00337883
Csa_010450015.1	PREDICTED: ATP-sulfurylase 3, chloroplastic [Camelina sativa]	0	18	0	465		0	3.38593e+07	0.00336011	2.04859e+07	0.00220009	3.82924e+07	0.00319896	4.7705e+07	0.0035084	4.069e+07	0.00419729
Csa_010414263.1	PREDICTED: trans-cinnamate 4-monooxygenase-like [Camelina sativa]	0	19	6	505		0	1.01844e+07	0.000930621	4.48922e+06	0.000443934	1.98371e+07	0.00152593	3.39259e+07	0.00229741	2.16156e+07	0.00205309
Csa_010462205.1	PREDICTED: protein DJ-1 homolog B [Camelina sativa]	0	9	3	447		0	1.98124e+07	0.0020453	6.88269e+06	0.000768934	2.68618e+07	0.00233441	2.54622e+07	0.00194799	2.0775e+07	0.00222929
Csa_010421606.1	PREDICTED: serine--tRNA ligase, cytoplasmic [Camelina sativa]	0	18	6	451		0	2.69776e+07	0.00276029	8.88223e+06	0.000983521	2.18725e+07	0.00188396	3.4605e+07	0.00262398	2.84879e+07	0.00302983
Csa_010433532.1	PREDICTED: 60S ribosomal protein L31-3 [Camelina sativa]	0	11	0	119		0	6.40103e+07	0.0248217	2.38862e+07	0.0100239	6.88518e+07	0.0224759	8.44416e+07	0.0242665	7.22341e+07	0.0291158
Csa_010513890.1	PREDICTED: HMG-Y-related protein A-like [Camelina sativa]	0	13	3	200		0	8.27629e+06	0.00190956	3.58283e+06	0.000894613	1.21965e+07	0.00236895	1.68066e+07	0.00287374	1.45435e+07	0.00348796
Csa_010419788.1	PREDICTED: omega-amidase, chloroplastic [Camelina sativa]	0	11	2	370		0	12866743	0.0016047	9070685	0.00122427	1.53278e+07	0.00160927	24906547	0.00230202	1.27766e+07	0.00165634
Csa_010421920.1	PREDICTED: cytochrome c-2 [Camelina sativa]	0	25	1	112		0	3.49818e+07	0.0144129	28867114	0.0128713	5.22157e+07	0.0181106	4.85086e+07	0.0148115	2.68724e+07	0.0115086
[truncated: 3,083 more rows]

## Sheet: crTCA
Accession	Description	Exp. q-value: Combined	# PSMs	# Protein Unique Peptides	# AAs	Abundance: T1	Normalized_T1 (%)	Abundance: T2	Normalized_T2 (%)	Abundance: T3	Normalized_T3 (%)	Abundance: T4	Normalized_T4 (%)	Abundance: T5	Normalized_T5 (%NSAF)	Abundance: cp_T	Normalized_cp_T (%)
[truncated: 4,566 more rows]

[truncated: 3 more sheets: Construct 1, Construct 1 Ratios, crTCA Ratios]
